# Supplementary material for: Library Screening, Divergent Evolution and Chemoenzymatic Relay Enabled Comprehensive Oxidation of Labdane
Source: Research Square preprint supplement (doi:10.21203/rs.3.rs-4320968/v1), 2024-04-30

# Library Screening, Divergent Evolution and Chemoenzymatic Relay Enabled Comprehensive Oxidation of *Labdane*

Xiaotao Liu<sup>1,2</sup>, Yaoyao Xu<sup>1,2</sup> and Jian Li<sup>1</sup>

<sup>1</sup>Frontiers Science Center for Transformative Molecules, School of Chemistry and Chemical Engineering,  
Shanghai Key Laboratory for Molecular Engineering of Chiral Drugs and Zhangjiang Institute for  
Advanced Study, Shanghai Jiao Tong University, Shanghai 200240, China

<sup>2</sup>These authors contributed equally: Xiaotao Liu, Yaoyao Xu.

## SUPPLEMENTARY INFORMATION

### Table of Contents

|                                                                                    |    |
|------------------------------------------------------------------------------------|----|
| General Materials and Methods.....                                                 | 2  |
| Protein and DNA Sequences .....                                                    | 3  |
| Generation of pESC-URA-Sth10-TnPOR Expression Vector .....                         | 9  |
| Generation of pET22b(+)-MERO1 and pRSF-Opt13 Co-expression Vector .....            | 9  |
| Generation of pET22b(+)-KSA15 and pRSF-Opt13 Co-expression Expression Vector ..... | 9  |
| Generation of pET28a(+)-AndA and pET28a(+)-Trt7 expression Expression Vectors..... | 9  |
| Generation of Mutants of AndA .....                                                | 10 |
| General synthetic procedures.....                                                  | 10 |
| Initial screen of enzyme variants .....                                            | 11 |
| Figure S1.....                                                                     | 13 |
| Synthetic procedures.....                                                          | 14 |
| References.....                                                                    | 44 |
| NMR Spectra of Compounds .....                                                     | 45 |

## General Materials and Methods

All reactions were carried out under an argon atmosphere with dry solvents under anhydrous conditions, unless otherwise noted. All reagents were purchased at the highest commercial quality and used without further purification, unless otherwise stated. Solvents for chromatography were used as supplied by GENERAL-REAGENT<sup>®</sup>. Reactions were monitored by thin layer chromatography (TLC). TLC was performed with 0.25 mm Merck glass plates (silica gel 60 F<sub>254</sub>) using shortwave UV light as the visualizing agent, KMnO<sub>4</sub>, cerium ammonium molybdate (Hanessian's stain), phosphomolybdic acid and heat as developing agents. SiliaFlash<sup>®</sup> P60 silica gel (particle size: 40–63  $\mu$ m, 230–400 mesh) was used for flash column chromatography. NMR spectra were recorded on a Bruker AVANCE NEO 400 MHz, Bruker AVANCE NEO 500 MHz and Bruker AVANCE III 600 MHz NMR spectrometer. The spectra were calibrated by using residual undeuterated solvents (for <sup>1</sup>H NMR) and deuterated solvents (for <sup>13</sup>C NMR) as internal references: undeuterated chloroform ( $\delta_{\text{H}} = 7.26$  ppm) and CDCl<sub>3</sub> ( $\delta_{\text{C}} = 77.16$  ppm); undeuterated methanol ( $\delta_{\text{H}} = 3.31$  ppm) and methanol-*d*<sub>4</sub> ( $\delta_{\text{C}} = 49.00$  ppm); undeuterated acetone ( $\delta_{\text{H}} = 2.05$  ppm) and acetone-*d*<sub>6</sub> ( $\delta_{\text{C}} = 29.84$  ppm). The following abbreviations are used to designate multiplicities: s = singlet, d = doublet, t = triplet, g = quartet, m = multiplet, br = broad. Melting points (m.p.) were recorded on an SGW X-4B apparatus. Specific rotations were recorded on Anton Paar MCP 5500. High-resolution mass spectra (HRMS) were recorded on a Waters G2-XS/APGC. Expression vectors were obtained via DNA synthesis from Universe Gene Technology (Tianjin) Co., Ltd. and were used directly to competent *E. coli* BL21(DE3). Competent *E. coli* BL21(DE3) strains were purchased from Sangon Biotech (Shanghai) Co., Ltd. All *E. coli* strains generated in this work are stored as glycerol stocks at –80 °C.

## *Protein and DNA Sequences*

### Protein sequence of Sth10:

MSNSTLVSFASLRLLDTVVQPGGGSSSSDVLALAKTHSLELGLGAFIVATRYMYQLLKARANALKELDGPSPISS  
IWGDENLLSDFENGLSAHDELLNRYGSVCRIKGPLGEDRLWTADPRAINIIILKGFDFHEPEGLLAWFDLSFGPT  
LISQIGHKHKIQRKILNPVFTAAMRKLTPIFHSITHYLEDDVVASKVRASGGKTGIVDMYTWSNVALEMIGQAGI  
GHSFGVMGKEPEYIDASRQLFILICRMWYIRPFLPILMKIGTTFRQFVIERIPHGPTNEMKKVVDVMDKMATDI  
YAQKKEALANGTLDSEIAAGNDIISMLLKQNEVVPEDQMSEEEIILAQVNGLIIFAGHDTTSGGLTRTLHLLAQHPE  
VQDQLRAEVREAHGLHGKELDYDQINSLTYLDAVCRESLRLWSPAQTLERVAMKDWNLPLHYPVKSNDGKKMVTSL  
NIPEGTHIYISLGSVNRDKQTWGDDADKFNPARWLSPPPASVTESRIPGVYSNMMTFSGGPRSCLGFKFSQLEMKV  
VLSALVASFKFELGPEQHMWGAAGVLKPHVRHQDGTIDATPSLRMKVTLVEE

### DNA sequence of Sth10:

**GGATCC**ATGTCAAACCTCAACATTAGTATCATTTGCATCATTACGTACATTGCTAGACACTGTTGTACAACCGGGTG  
GAGGTTCTTCTCATCCGACGTTCTGGCATTGGCCAAAACCCACAGTCTGGAGCTAGGTCTAGGGGCATTTGCTAT  
TGTTGCAACAAGGTACATGTACCAGCTTTTAAAAAGGGCCAACGCCTTGAAAGAATTAGACGGACCATCTCCTATA  
TCTTCAATCTGGGGGATGAAAATCTTTTAAAGTGACTTCGAAAACGGTCTAAGTGCCCATGACGAATTGTTGAATA  
GGTATGGTTCTGTCTGCAGAATCAAAGGTCCATTGGGCGAAGATAGATTATGGACAGCTGATCCCAGAGCAATTAA  
TGACATCATCTTAAAAGGATTGACCATTTTCACGAACCAGAAGGTCTACTTGCTTGCTTGCAGTTGAGCTTTGGT  
CCAACTCTGATCTCACAGATTGGTCATAAGCATAAGATCCAAAGAAAGATTTTGAACCCGGTCTTCACAGCCGCC  
ACATGAGAAAGTTGACTCCGATCTTTCACTCCATAACACATTACCTAGAGGATGTAGTCGCCTCTAAAGTGAGAGC  
TTCCGGCGGTAAAACCGGTATTGTTGACATGTACACGTGGATGTCAAATGTGGCTTTGGAGATGATAGGTCAAGCA  
GGGATCGGACATAGCTTCGGCGTAATGGAAGGTAAAGAACCCGAGTATATTGATGCGTCAAGACAATTATTCATCT  
TAATTTGCAGAATGTGGTATATCAGACCCTTCCTTCCAATCTTGATGAAAATTGGAACAACGAGGTTTAGGCAATT  
TGTCATAGAAAGAATCCCTCATGGTCCGACGAATGAAATGAAAAAAGTGGTTGACGTGATGGACAAGATGGCTACA  
GACATTTACGCTCAAAAAAAGAAGCCCTGGCCAACGGGACGCTAGATAGTGAAATAGCAGCTGGTAACGATATCA  
TCTCCATGCTACTTAAGCAAAACGAAGTAGTACCACCAGAAGATCAAATGAGCGAGGAGGAGATTTTGGCTCAAGT  
TAATGGATTGATCTTTGCTGGACATGATACAACATCTGGAGGCCTGACACGTACCTTACATCTGCTGGCCCAACAT  
CCCGAAGTGCAAGACCAATTGAGAGCAGAAGTACGTGAGGCACATGGCCTTCATGGAAAAGAATTAGACTACGATC  
AGTTAAATTCTCTAACATACCTAGATGCTGTATGTCGTGAGAGTCTTAGGTTATGGTCTCCTGCTCAAACCTCTGGA  
ACGTGTTGCTATGAAAGATTGGAACCTGCCACTGCATTACCCAGTTAAGTCCAACGACGGCAAGAAGATGGTAACT  
TCTTTGAATATTCCGGAAGGTACCCATATATACATCTCCCTTGGCTCCGTAAACAGAGATAAAACAACTTGGGGTG  
ACGACGCTGATAAATTCAATCCAGCCAGGTGGTTATCTCCACCACCCGCATCAGTGACCGAATCTAGAATCCCTGG  
TGTTTATTCAAATATGATGACATTCAGTGGGGGTCCAAGAAGTTGCCTGGGGTTCAAATTCTCACAATTGGAGATG  
AAGGTCGTTTTGTCTGCATTGGTTGCCTCTTTTAAAGTTGCAATTGGGTCCAGAACACATATGTGGGGTGCAGCTG  
GTGTGCTAAAACCACATGTCAGGCATCAAGACGGCACTATAGATGCAACACCATCCTTGAGAATGAAAGTCACATT  
GGTTGAAGAGTAA**AAGCTT**

### Protein sequence of TnPOR:

MAPALSTNDLALIGVGVGLTTAFIFREQIFGDKKKSVPNAAKKAVADQGDPRDFVAKMIANKKRLAIFYGSQTGTA  
EEYAIRIAKEAKSRFGLGSLVCDLEEDFNKLDALPEGCAAFVMTYGEGETDNAVEMNNINEDDFEFSKGEH  
RLEGLKYVVFGLGNKTYEHYNKVARDVDDKLTTLGAQRIGERGEEDDKSMEEDYLEWKEKMWPEFARVMGVEEGA  
GSDSPDFKVTEVDTHPPEKVYLGELSARALTKTRGIHDAKNPYPAPIQGIRELFAVGGERNCIHAEFNIEGSGITY  
QHGDHVGLWPSNADVEVDRLLFSLGLGAPDRRTAVIDIESLDPQLAKVPFPVPTTYETVLRHYIDISSVASRQTLG  
ALAKYAPTPEAGAALTALATDKAQYGSIVAGGCLKLGEVLQLVAGNSINSKPTGDNTTTWNIPFDVIVSAIPRLQP  
RYYSISSSPKLHPTSIHVTCVVLKYESEASERAPSKWVFGVGSNYLLNLKMAAHGEQAPLLSEGGVESVTNPIYAI  
SGPRSSYQGEAGYKAPIHVRRSTFRLPTNPKTPVIMIGPGTGAVPFRGFVQERVALARKAIEKNGEDALADWGQIS  
LYYGCRDENEDFLYKDEWPEYQSELKGKFTMRNAFSRSGARKPDGSKIYVQDLLWEDRAAVSEAINKRGYVYICG  
DAKNMSKAVEDILIKIFNEAGKNGTEELKTMKERSRLLLDVWS

### DNA sequence of TnPOR:

**GAATTC**ATGGCCCCAGCTCTATCCACAAATGACTTAGCTTTAATCGGCGTAGGCGTAGGCTTAACGACGGCTTTTA  
TTTTTAGGGAACAAATCTTTGGCGATAAAAAAAAAAGTGTTCTAATGCCGCAAAAAAGCCGTCGCAGATCAAGG  
TGATCCCCGTGATTTCGTTGCTAAAATGATTGCTAATAAGAAGCGTTTGGCAATTTTTTATGGTTCTCAAACCGGT  
ACAGCTGAGGAATATGCGATTCTGTATAGCAAAAGAAGCTAAATCCAGATTCGGCTTGGGCTCTTTGGTTTGCGACC  
TTGAAGAATACGATTTTAACAAGTTGGATGCTCTTCCAGAGGGTTGCGCTGCCATCTTCGTGATGGCAACGTATGG  
TGAGGGTGAACCAACGGACAACGCTGTAGAGTTTATGAATAATATAAATGAAGATGACTTCGAGTTTAGTAAAGGT  
GAACATCGTCTGGAGGGGCTAAAATATGTGGTGTGTTGGTTTAGGTAACAAAACGTATGAGCATTACAACAAGGTGG  
CTAGGGATGTTGATGATAAATTAACCTACATTGGGTGCTCAGAGAATTGGTGAAAGAGGTGAGGGTGATGATGATAA  
GTCTATGGAAGAAGATTACTTAGAATGGAAAGAAAAGATGTGGCCTGAGTTTGCAAGAGTGATGGGAGTTGAAGAA  
GGTGCTGGTTCTGATTCTCCGGATTTTAAAGTGACGGAAGTCGATACGCACCCACCAGAAAAGGTATATCTTGCGC  
AACTGAGCGCAAGAGCTCTTACCAAGACTCGTGGTATTCATGATGCAAAAAACCTTACCCAGCCCCTATTCAAGG  
GATTAGAGAGCTATTTGCCGTTGGTGGGGAAAGAACTGTATCCATGCCGAGTTCAACATTGAAGGTTACAGGTATT  
ACATATCAACATGGAGACCACGTTGGCCTTTGGCCATCTAACGCAGATGTAGAAGTCGATAGGTTACTGTTCTCTT  
TAGGGTTGGGCGCACCAGACAGGAGGACCGCTGTTATTGATATAGAGTCTCTGGACCCACAACCTTGCTAAAGTTCC  
TTTTCCAGTCCCAACTACCTATGAAACAGTTTTGAGGCATTACATTGATATTAGCTCAGTTGCTTCAAGACAACT  
CTGGGTGCCTTAGCCAAATACGCTCCAACGCCTGAAGCCGGTGCTGCCTTAACAGCTCTGGCAACCGACAAAGCAC  
AATACGGCAGCATTGTGGCTGGTGGTTGCTTGAAACTAGGTGAGGTTCTGCAATTGGTTGCTGGAAACTCAATTAA  
TTCTAAACCTACAGGCGACAACACCACTACGTGGAACATTCCATTCGACGTGATTGTCTCAGCTATTCCTAGGTTA  
CAACCTAGATACTATTCTATTTCTCCAGCCCGAAGCTGCACCCACATCTATTGATGTTACGTGTGTAGTGTGTA  
AATACGAAAGTGAAGCCTCAGAAAGAGCACCGTCAAAGTGGGTTTTTGGGGTTGGATCTAATTATTTACTAAACCT  
AAAGATGGCTGCACACGGTGAACAAGCACTGTTGTCTGAGGGTGGTGTGAGTCAGTAACAAATCCTATCTAT  
GCCATCTCTGGCCCAAGATCTTCTTACCAAGGTGAAGCTGGTTACAAAGCGCCTATTCATGTCAGAAGGAGTACGT  
TCAGATTACCAACGAACCCGAAAACACCCGTTATTATGATCGGTCCAGGTACCGGTGTAGCACCTTTCAGAGGTTT  
TGTGCAGGAGAGGGTCGCTTTGGCTAGAAAAGCTATTGAAAAAATGGTGAAGACGCCTTAGCTGATTGGGGACAG



ATTTCTTTGTATTACGGATGCCGTGACGAAAATGAGGACTTCCTTTACAAAGATGAGTGGCCGGAATACCAGTCAG  
AGTTGAAGGGAAAATTTACTATGAGAAATGCTTTTTCTAGATCAGGGGCGCGTAAGCCTGATGGTTCCAAGATATA  
TGTTCAAGATCTATTGTGGGAAGATAGAGCAGCGGTTTCCGAAGCCATAAATGAAAAGAGAGGGTACGTCTATATT  
TGCGGAGATGCTAAGAATATGTCTAAAGCTGTTGAGGATATATTGATAAAAATCTTCAATGAAGCGGGGAAAAACG  
GTACAGAAGAGTTGAAAACGATGAAGGAAAGATCTAGACTGTTATTAGATGTGTGGTCATAA**ACTAGT**

#### Protein sequence of AndA:

MTIESKNYPPIRRVNASQGSDAAYQILQEDGCVIVEQVICPNIIAKISDDVNRVMDKATIGAKKGEQTHIINMHNH  
TIHMGDLVLTSKTYRDELLNLPFAHEVLEKVFKKDSGDYWLNMGNI LNMLPGAEAQRPHRDDYLYPVSQHMDPATS  
PDLMINITFPLNEFRHDNGGTL LLLPKSHTGPNADFYANAEDLPAAEMQVGDALIFTGKCVHGGGANRSDKPRIGLA  
LAAQPGYLTpresNVNPRDIVETMTPLAQRMIGWGTVRTKDTYGLNMLQDKDFHEALGLKSKTA

#### DNA sequence of AndA:

ATGACCATTGAAAGCAAAAAC TACCGCCGATTTCGTCTGTGAATGCCAGTCAGGGTAGCGATGCAGCATATCAGA  
TTCTGCAGGAAGATGGTTGCGTTATTGTTGAACAGGTTATTTGCCCGAATATTATTGCAAAAATCAGCGATGATGT  
GAATCGTGTTATGGATAAAGCAACCATTTGGCGCAAAAAAAGGTGAACAGACCCATATTATTAACATGCATAATCGT  
ACCATCCATATGGGCGATCTGGTGCTGACCAGCAAAACCTATCGTGATGAACTGCTGAATCTGCCGTTTGACATG  
AAGTTCTGGAAAAAGTTTTTAAAAAGGACAGTGGCGATTATTGGCTGAATATGGGTAATATTCTGAATATGCTGCC  
GGGTGCAGAAGCCCAGCGTCCGCATCGCGATGATTATCTGTATCCGTTAGCCAGCATATGGATCCGGCAACCAGC  
CCGGATCTGATGATTAATATTACCTTTCCGCTGAATGAATTCCGCCATGATAATGGCGGCACCCTGCTGCTGCCGA  
AAAGCCATACCGGTCCGAATGCCGATTTTTATGCAAATGCCGAAGATCTGCCGGCAGCAGAAATGCAGGTTGGTGA  
TGCACTGATTTTTACCGGTAAATGTGTTTCATGGCGGCGGCGCCAATCGCAGCGATAAACCGCGTATTGGTCTGGCA  
CTGGCCGCACAGCCGGGTTATCTGACCCCGCGTGAAAGCAATGTTAATGTGCCGCGCGATATTGTTGAAACCATGA  
CCCCGCTGGCCCAGCGTATGATTGGCTGGGGTACCGTGCGCACCAAAGATACCTATGGTCTGAATATGTTACAGGA  
TAAAGATTTTCACGAGGCACTGGGTCTGAAAAGCAAAACCGCC

#### Protein sequence of Trt7:

MTGQAEAIRRVHPTVSPKQAAQMLQEDGVII LKSFLAPDVMQRFQAEVDEDVEKTSTGARMKAYKLVNDKTKHMAD  
LIVRSEVFRSDILTHPLYHAIADELFRADYGDHWNASAVLQLMPGAPAQQLHRDEEIFAASKFRSPTDPQLSLSC  
LVALTEFTEENGATRLIPGSHLWDSAH PAPSPDQTVPAIMQPGEAILFLGSLFHGGGENRTENVRRLGMSLIPCQ  
FTPYSSMHVPRTI IETMTPLAQKLVGWRTVESHRQYPFWQGGDRRLEDVLGLASREA

#### DNA sequence of Trt7:

ATGACCGGCCAGGCAGAAGCAATTCGTCTGTTCATCCGACCGTGAGCCCCGAAACAGGCAGCACAGATGCTGCAGG  
AAGATGGTGTGATTATTCTGAAAAGTTTTCTGGCACCGGATGTGATGCAGCGTTTTCAGGCCGAAGTTGATGAAGA  
TGTTGAAAAAACAGCACCGGTGCACGTATGAAAGCCTATAAACTGGTGAATGATAAAACCAAACACATGGCCGAT  
CTGATTGTGCGTAGCGAAGTGTTCGTAGCGATATTCTGACCCATCCGCTGTATCATGCAATTGCAGATGAACTGT  
TTCGTGCAGATTATGGTGATCATTGGCTGAATGCCAGCGCCGTGCTGCAGCTGATGCCGGGTGCCCTGCCAGCA

GCTGCATCGTGATGAAGAAATTTTTGCAGCCAGTAAATTTTCGCAGTCCGACCGATCCGCAGCTGAGTCTGAGTTGT  
CTGGTGGCCCTGACCGAATTTACCGAAGAAAATGGTGCCACCCGCCTGATTCCGGGTAGTCATCTGTGGGATAGTG  
CCCATCCGGCCCCGAGCCCGGATCAGACAGTTCCGGCCATTATGCAGCCGGGCGAAGCAATTCTGTTTTCTGGGTAG  
TCTGTTTTCATGGTGGCGGTGAAAAATCGCACCGAAAATGTGCGTCGCGGTCTGGGTATGAGTCTGATTCCGTGTCAG  
TTTACCCCGTATAGCAGCCACATGCATGTTCCGCGCACCATTATTGAAACCATGACCCCGCTGGCACAGAAACTGG  
TTGGCTGGCGCACCGTTGAAAGTCATCGTCAGTATCCGTTTTTGGCAGGGCGGCGATCGTCGCCTGGAAGATGTGCT  
GGGCCTGGCAAGTCGCGAAGCA

### Protein sequence of MERO1:

MTIKEMPQPKTFGELKNLPLLNTDKPVQALMKIADELGEIFKFEAPGRVTRYLSSQRLIKEACDESFRDKNLSQAL  
KFARDFGGDGLVTSWTHEKNWKKAHNILLPSFSQQAMKGYHAMMVDIAVQLVQKWERLNADEHIEVSEDMTRLTLD  
TIGLCGFNYRFNSFYRDQPHPFIIISMVRALDEVMNKLQRANPDDPAYDENKRQCQEDIKVMNDLVDKIIADRKARG  
EQSDDLTLQMLNGKDPETGEPLDDGNISYQIIITFLIAGHETTSGLLSFALYFLVKNPHVLQKVAEEAARVLVDPVP  
SYKQVKQLKYVGMVLNEALRLWPTAPAFSLYAKEDTVLGGEYPLEKGDEVMLIPQLHRDKTIWGDDVEEFRPERF  
ENPSAIPQHAFKPFNGQRACIGQQFALHEATLVLGMMMLKHFDFFEDHTNYELDIKETLTLKPEGFVVKAKSKKIPL  
GGIPSPSTEQSAKKVRKKAENAHNTPLLVLVYGSNMGTAEGTARDLADIAMSKGFAPQVATLDSHAGNLPREGAVLI  
VTASYNHPPDNAKQFVDWLDQASADEVKGVRYSVFGCGDKNWATTYQKVPAFIDETLAAKGAENIADRGEADASD  
DFEGTYEEWREHMWSDVAAYFNLDIENSEDNKSTLSLQFVDSAADMPLAKMHGAFSTNVVASKELQQPGSARSTRH  
LEIELPKEASYQEGDHLGVI PRNYEGIVNRVTARFGLDASQQIRLEAEEEEKLAHLPLAKTVSVEELLQYVELQDPV  
TRTQLRAMAAKTVCPPHKVELEALLEKQAYKEQVLAKRLTMLELLEKYPACEMKFSEFIALLPsirpryysissp  
RVDEKQASITVSVVSGEAWSGYGEYKGIASNYLAELQEGDTITCFISTPQSEFTLPKDPETPLIMVGPGTGVPFR  
GFVQARKQLKEQGQSLGEAHLVFGCRSPHEDYLYQEELENAQSEGIITLHTAFSRMPNQPKTYVQHVMEQDGKKLI  
ELLDQGAHFYICGDGSQMAPAVEATLMKSYADVHQVSEADARLWLQQLEEKGRYAKDVWAG

### DNA sequence of MERO1:

ATGACAATTAAAGAAATGCCTCAGCCAAAACGTTTGGAGAGCTTAAAAATTTACCGTTATTAAACACAGATAAAC  
CGGTTCAAGCTTTGATGAAAATTGCGGATGAATTAGGAGAAATCTTTAAATTCGAGGCGCCTGGTCGTGTAACGCG  
CTACTTATCAAGTCAGCGTCTAATTAAAGAAGCATGCGATGAATCACGCTTTGATAAAAACCTTAAGTCAAGCGCTT  
AAATTCGCGCGTGATTTTGGCGGAGACGGGTAGTTACAAGCTGGACGCATGAAAAAATTGGAAAAAAGCGCATA  
ATATCTTACTTCCAAGCTTTAGTCAGCAGGCAATGAAAGGCTATCATGCGATGATGGTCGATATCGCCGTGCAGCT  
TGTTCAAAGTGGGAGCGTCTAAATGCAGATGAGCATATTGAAGTATCGGAAGACATGACACGTTTAACGCTTGAT  
ACAATTGGTCTTTGCGGCTTTAACTATCGCTTTAACAGCTTTTACCGAGATCAGCCTCATCCATTTATTATAAGTA  
TGGTCCGTGCACTGGATGAAGTAATGAACAAGCTGCAGCGAGCAAATCCAGACGACCCAGCTTATGATGAAAACAA  
GCGCCAGTGTCAAGAAGATATCAAGGTGATGAACGACCTAGTAGATAAAATTATTGCAGATCGCAAAGCAAGGGGT  
GAACAAAGCGATGATTTATTAACGCAGATGCTAAACGGAAAAGATCCAGAAACGGGTGAGCCGCTTGATGACGGGA  
ACATTAGCTATCAAATTATTACATTCTTAATTGCGGGACACGAAACAACAAGTGGTCTTTTATCATTGTGCGTGTA  
TTTCTTAGTGAAAAATCCACATGTATTACAAAAAGTAGCAGAAGAAGCAGCACGAGTTCTAGTAGATCCTGTTCCA  
AGCTACAAACAAGTCAAACAGCTTAAATATGTCGGCATGGTCTTAAACGAAGCGCTGCGCTTATGGCCAACTGCGC

CTGCGTTTTCCCTATATGCAAAAGAAGATACGGTGCTTGGAGGAGAATATCCTTTAGAAAAAGGCGACGAAGTAAT  
GGTCTGATTCCCTCAGCTTCACCGTGATAAAACAATTTGGGGAGACGATGTGGAGGAGTTCCGTCCAGAGCGTTTT  
GAAAATCCAAGTGCGATTCCGCAGCATGCGTTTAAACCGTTTGAAACGGTCAGCGTGCGTGTATCGGTCAGCAGT  
TCGCTCTTCATGAAGCAACGCTGGTACTTGGTATGATGCTAAAACACTTTGACTTTGAAGATCATACAAACTACGA  
GCTCGATATTAAAGAACTTTAACGTTAAAACCTGAAGGCTTTGTGGTAAAAGCAAAATCGAAAAAATTCCGCTT  
GGCGGTATTCCCTCACCTAGCACTGAACAGTCTGCTAAAAAAGTACGCAAAAAGGCAGAAAACGCTCATAATACGC  
CGCTGCTTGTGCTATACGGTTCAAATATGGGAACAGCTGAAGGAACGGCGCGTGATTTAGCAGATATTGCAATGAG  
CAAAGGATTTGCACCGCAGGTCGCAACGCTTGATTACACGCCGAAATCTTCCGCGCGAAGGAGCTGTATTAATT  
GTAACGGCGTCTTATAACGGTCATCCGCCTGATAACGCAAAGCAATTTGTGCGACTGGTTAGACCAAGCGTCTGCTG  
ATGAAGTAAAAGGCGTTCGCTACTCCGTATTTGGATGCGGCGATAAAAACCTGGGCTACTACGTATCAAAAAGTGCC  
TGCTTTTATCGATGAAACGCTTGCCGCTAAAGGGGCAGAAAACATCGCTGACCGCGGTGAAGCAGATGCAAGCGAC  
GACTTTGAAGGCACATATGAAGAATGGCGTGAACATATGTGGAGTGACGTAGCAGCCTACTTTAACCTCGACATTG  
AAAACAGTGAAGATAATAAATCTACTCTTTCACCTTCAATTTGTGCGACAGCGCCGCGGATATGCCGCTTGCGAAAAT  
GCACGGTGCGTTTTCAACGAACGTCGTAGCAAGCAAAGAACTTCAACAGCCAGGCAGTGCACGAAGCACGCGACAT  
CTTGAAATTGAACTTCCAAAAGAAGCTTCTTATCAAGAAGGAGATCATTTAGGTGTTATTCCTCGCAACTATGAAG  
GAATAGTAAACCGTGTAACAGCAAGGTTGCGCCTAGATGCATCACAGCAAATCCGTCTGGAAGCAGAAGAAGAAAA  
ATTAGCTCATTTGCCACTCGCTAAAACAGTATCCGTAGAAGAGCTTCTGCAATACGTGGAGCTTCAAGATCCTGTT  
ACGCGCACGCAGCTTCGCGCAATGGCTGCTAAAACGGTCTGCCCCGCCGATAAAGTAGAGCTTGAAGCCTTGCTTG  
AAAAGCAAGCCTACAAAGAACAAGTGCTGGCAAAACGTTTAAACAATGCTTGAAGTCTTGA AAAAATACCCGGCGTG  
TGAAATGAAATTCAGCGAATTTATCGCCCTTCTGCCAAGCATAACGCCCGCGCTATTACTCGATTTCTTCATCACCT  
CGTGTCGATGAAAAACAAGCAAGCATCACGGTCAGCGTTGTCTCAGGAGAAGCGTGGAGCGGATATGGAGAATATA  
AAGGAATTGCGTCGAACTATCTTGCCGAGCTGCAAGAAGGAGATACGATTACGTGCTTTATTTCCACACCGCAGTC  
AGAATTTACGCTGCCAAAAGACCCTGAAACGCCGCTTATCATGGTCGGACCGGGAACAGGCGTCGCGCCGTTTAGA  
GGCTTTGTGCAGGCGCGCAAACAGCTAAAAGAACAAGGACAGTCACTTGGAGAAGCACATTTATACTTCGGCTGCC  
GTTACCTCATGAAGACTATCTGTATCAAGAAGAGCTTGAAAACGCCCAAAGCGAAGGCATCATTACGCTTCATAC  
CGCTTTTTTCTCGCATGCCAAATCAGCCGAAAACATACGTTTACGACGTAATGGAACAAGACGGCAAGAAATTGATT  
GAACTTCTTGATCAAGGAGCGCACTTCTATATTTGCGGAGACGGAAGCCAAATGGCACCTGCCGTTGAAGCAACGC  
TTATGAAAAGCTATGCTGACGTTACCAAGTGAGTGAAGCAGACGCTCGCTTATGGCTGCAGCAGCTAGAAGAAAA  
AGGCCGATACGCAAAAGACGTGTGGGCTGGG

**Protein sequence of KSA15 (heme domain):**

MTIKEMPQPKTFGELKNLPLLNTDKPVQALMKIADELGEIFKFEAPGYVFRYLSSQRLIKEACDESRFDKNLSQAL  
KFIRDFMGDLATSWTHEKNWKKAHNILLPSFSQQAMKGYHAMMVDIAVQLVQKWERLNADEHIEVPEDMTRLTLTD  
TIGLCGFNYRFNSFYRDQPHPFITSMVRALDEAMNKLQRANPDDPAYDENKRQFQEDIKVMNDLVDKI IADRKASG  
EQSDDLLTHMLNGKDPETGEPLDDENIRYQIITFLIAGHETTSGLLSFALYFLVKNPHVLQKAAEEAARVLVDPVP  
SYKQVKQLKYVGMVLNEALRLWPTAPAFSLYAKEDTVLGGEYPLEKGDELMVLIPQLHRDKTIWGDDVEEFRPERF  
ENPSAIPQHAFKPFNGQRACIGQQFALHEATLVLGMLLKHFD FEDHTNYELDIKETLTLKPEGFVVKAKSKKIPL  
GGIPSPSTEQSAKKVRKKAENAHNTP

### DNA sequence of KSA15 (heme domain):

ATGACAATTAAAGAAATGCCTCAGCCAAAAACGTTTGGAGAGCTTAAAAATTTACCGTTATTAAACACAGATAAAC  
CGGTTCAAGCTTTGATGAAAATTGCGGATGAGTTAGGTGAGATCTTTAAGTTGAGGCCCCCGGGTATGTATTCCG  
CTACCTGTCTAGTCAACGCTTAATCAAGGAAGCGTGTGACGAGTCTCGCTTCGACAAGAACTTAAGTCAGGCACTT  
AAGTTCATTGCGGACTTCATGGGCGATGGCTTGGCGACATCGTGGACCCACGAGAAGAATTGGAAGAAGGCACACA  
ATATTTTGCTTCCGAGCTTCTCACAACAAGCCATGAAGGGGTATCATGCAATGATGGTTGACATCGCAGTGCAGCT  
CGTTCAGAAGTGGGAGCGCTTGAACGCTGATGAGCACATTGAAGTCCCAGAGGACATGACGCGTCTGACATTGGAC  
ACGATTGGCTTATGTGGCTTTAATTATCGTTTTAACTCCTTCTATCGTGATCAACCGCACCCATTTATTACCTCTA  
TGGTGCGCGCACTGGACGAAGCCATGAATAAGTTACAACGCGCAAACCCTGATGACCCCGCGTATGACGAGAACAA  
GCGCCAATTTCAAGAGGACATCAAGGTTATGAACGACTTAGTAGACAAGATCATCGCGGACCGCAAGGCATCTGGT  
GAACAGTCCGATGACCTGCTGACACACATGTTAAACGGGAAGGACCCAGAAACGGGCGAGCCACTGGACGATGAAA  
ACATCCGTTATCAAATTATCACCTTCTTAATCGCAGGTCACGAGACCACGTCCGGCCTGCTTTCCTTCGCCCTCTA  
TTTTCTCGTTAAGAACCCGCACGTACTCCAAAAGGCGGCGGAAGAGGCCGCACGCGTTCTTGTGGACCCCGTCCCG  
AGCTACAAGCAAGTTAAGCAATTGAAGTATGTGGAATGGTTCTTAATGAGGCGCTGCGTCTCTGGCCAACTGCGC  
CCGCCTTTAGCTTGTACGCGAAAAGAGGACACTGTACTGGGCGGCGAGTACCCGTTAGAGAAGGGAGACGAACTGAT  
GGTTTTGATTCCACAGTTACACCGTGACAAGACGATTTGGGGCGACGACGTTGAGGAGTTTCGCCCTGAACGCTTC  
GAAAACCCGTCAGCGATTCCACAGCATGCCTTCAAGCCATTTGGTAATGGGCAACGCGCCTGCATCGGTCAGCAGT  
TCGCTCTTCATGAAGCAACGCTGGTACTTGGTATGATGCTAAAACACTTTGACTTTGAAGATCATACAAACTACGA  
GCTCGATATTAAAGAACTTTAACGTTAAAACCTGAAGGCTTTGTGGTAAAAGCAAATCGAAAAAATTCCGCTT  
GGCGGTATTCTTCACCTAGCACTGAACAGTCTGCTAAAAAAGTACGCAAAAAGGCAGAAAACGCTCATAATACGC  
CG

### Protein sequence of Opt-13:

MLPKLVITHRVHEEILQLLAPHCELITNQTDSTLTREEILRRCRDAQAMMAFMPDRVDADFLQACPELRVIGCALK  
GFDNFDVDACTARGVWLTFFPDLLTVPTAELAIGLAVGLGRHLRAADAFVRSKGFKGWQPHFYGTGLDNSTVGFGLG  
MGAIGLAMADRLQGWGATLQYHAAKALDTQTEQRLGLRQVACSELFASSDFILLALPLNADTLHLVNAELLALVRP  
GALLVNPCRGSVVDEAAVLAALERGLGGYAADVFEEDWARADRPLCIDPALLAHPNTLFTPHIGSAVRAVRLEI  
ERCAAQNILQALAGERPINAVNRLPKANPAAD

### DNA sequence of Opt-13:

AGTCTGCGGCAGGATTGGCCTTGGGCAGACGGTTCACAGCGTTGATTGGGCGCTCACCTGCCAATGCCTGGAGGAT  
GTTCTGCGCTGCACAACGTTCAATCTCCAGGCGCACCGCGCGCACTGCCGACCCTATGTGCGGAGTGAACAGCGTA  
TTCGGATGCGCGAGCAGCGCAGGATCGATGCACAGCGCCGGTCCGCGCGAGCCCAGTCTTCCATTTTGAATACAT  
CCGCCGCATACCCGCCGAGCTGGCCTCGCTCAAGCGCCGCGAGCACGGCGGCTTCATCCACTACCGAGCCACGACA  
GGGGTTTACAAGCAGAGCGCCCGGCCGTACGAGGGCAAGCAGCTCGGCGTTGACCAGATGCAGGGTATCGGCATTC  
AAGGGAAGCGCCAGCAGGATGAAGTCCGAGCTGGCGAAGAGTTCGCTGCACGCCACCTGGCGCAGGCCGAGCCGTT  
GCTCGGTTTGTGTATCCAGAGCCTTCGCCGCGTGGTACTGCAGGGTCGCGCCCCATCCCTGCAAGCGATCAGCCAT

GGCCAGTCCGATGGCGCCCATGCCAAGGAAGCCGACCGTAGAGTTATCCAGCCCCGTGCCGTAGAAATGTGGTTGC  
CAGCCCTTGAACCTGCCAGAGCGGACGAACGCATCTGCTGCCCCGAGATGCCGCCCCAGCCCCACCGCCAGTCCGA  
TCGCCAGCTCGGCAGTCGGGACCGTCAACAGATCAGGCACGAAGGTCAGCCAGACCCCGCGGGCAGTACAGGCGTC  
CACATCGAAATTGTCTGAAGCCCTTGAGCGCGCAGCCGATTACACGCAGCTCAGGGCAGGCTTGAAGAAAGTCTGCA  
TCGACCCGATCGGGCATGAACGCCATCATCGCCTGAGCATCGCGACAGCGGCGCAGAATTTCTCGCGCGTCAGCG  
TGCTGTCGGTCTGGTTGGTTATCAGCTCGCAATGTGGCGCCAGCAGTTGCAGGATCTCTTCGTGTACTCGGTGAGT  
TATAACGAGTTTCGGCAGCAT

### ***Generation of pESC-URA-Sth10-TnPOR Expression Vector***

Gene of Sth10 were excised with *Bam*HI and *Hind*III and cloned into the same sites of the pESC-URA to yield the plasmid pESC-URA-Sth10. Gene of TnPOR were excised with *Spe*I and *Eco*RI and cloned into the same sites of the pESC-URA-Sth10 to yield the plasmid pESC-URA-Sth10-TnPOR. The resulting plasmid were further confirmed by DNA sequencing. Afterwards, they were transformed into *S. cerevisiae* YPH499 using the Frozen-EA Yeast Transformation IITM Kit (Zymo Research) and verified by PCR amplification.

### ***Generation of pET22b(+)-MERO1 and pRSF-Opt13 Co-expression Vector***

The respective gene fragment of MERO1 was synthesized and assembled directly into pET22b(+) between *Nde*I and *Xho*I by Universe Gene Technology (Tianjin) Co to yield vector pET22b(+)-MERO1. Ltd. Opt-13 gene were inserted between *Nco*I and *Xho*I restriction sites of pRSF-1b to yield vector pRSF-Opt13. The resulting vectors pET22b(+)-MERO1 and pRSF-Opt13 were used to co-transform competent *E. coli* strain BL21(DE3).

### ***Generation of pET22b(+)-KSA15 and pRSF-Opt13 Co-expression Expression Vector***

The respective gene fragment of KSA15 heme domain was obtained via DNA synthesis from Universe Gene Technology (Tianjin) Co. A standard overlap extension PCR was performed on pET22b(+)-MERO1<sup>1</sup> to amplify its reductase domain and the rest of its backbone (minus its heme domain). Separately, a standard overlap extension PCR was performed on the respective heme domain gene fragments and the resulting linear fragments were ligated using NEBuilder HiFi DNA assembly to produce pET22b(+)-KSA15. The resulting vector pET22b(+)-KSA15 along with pRSF-Opt13 were used to co-transform competent *E. coli* strain BL21(DE3).

### ***Generation of pET28a(+)-AndA and pET28a(+)-Trt7 expression Expression Vectors***

The respective gene fragment of AndA and Trt7 was obtained via DNA synthesis from Universe Gene Technology (Tianjin) Co., Ltd. Both genes were inserted between *Nde*I and *Xho*I restriction sites of pET-

28a to yield vectors pET28a(+)-AndA and pET28a(+)-Trt7. The vectors were used directly to transform competent *E. coli* strain BL21(DE3).

### ***Generation of Mutants of AndA***

Site-saturated mutagenesis on pET28a(+)-AndA was performed by using standard QuikChange PCR method with primers containing the desired mutation at the appropriate position. The resulting PCR products were digested with DpnI, gel purified, and used directly to competent *E. coli* strain BL21(DE3).

### ***General synthetic procedures***

#### **Method A: Sth10**

*S. cerevisiae* strains hosting pESC-URA-Sth10-TnPOR were first inoculated into 4 mL uracil-free synthetic glucose medium (SD-URA, FunGenome Company) and cultured at 30 °C for 48 h at 220 rpm. Then cell culture was transfer into 50 mL uracil-free synthetic glucose medium (SD-URA, FunGenome Company) and cultured at 30 °C for 48 h at 220 rpm. 54 mL uracil-free culture was directly transfer 420 mL inducible medium which contained 1.8% (w/v) galactose and 0.2% (w/v) glucose and used directly for subsequent whole cell transformation.

#### **Method B: Preparation of Clarified Lysate of *E. coli* Expressing AndA Mutants and Trt7**

An overnight culture of recombinant *E. coli* BL21(DE3) cells harboring pET-28a(+)-based vector for expressing of AndA mutants or Trt7 plasmid was used to inoculate 500 mL TB media (in 2 L Erlenmeyer flasks) containing 50 µg/mL kanamycin. The cultures were shaken at 220 rpm at 37 °C for roughly 4 hours or until an optical density of OD<sub>600</sub> = 0.7 – 1.0 was reached. The cultures were cooled to 20 °C (20 min) and then induced with IPTG to final concentrations of 0.5 mM. The cultures were allowed to continue for another 20 hours at 20 °C and shaking at 220 rpm. Cell were harvested by centrifugation (4 °C, 15 min, 4,200 rpm), and the cell pellet was resuspended to 50 mM kPi (pH = 8.0) to required optical density of OD<sub>600</sub>. Cells were disrupted by sonication (5 min, cycle = 1 s on/2 s off, 50% amplitude) and used directly for subsequent reactions.

Clarified lysates containing the desired enzyme variants were prepared from 50 mL expression cultures according to the procedure described above.

## **Method C: Preparation of Clarified Lysate of *E. coli* Expressing P450BM3 Variant and Opt13 in Co-transformed Cells**

An overnight culture of recombinant *E. coli* BL21(DE3) cells harboring pET-22b(+)-based vector for expressing of P450<sub>BM3</sub> variant and pRSF-Opt13 plasmid was used to inoculate 500 mL TB media (in 2 L Erlenmeyer flasks) containing 50 µg/mL kanamycin, and 100 µg/mL ampicillin. The cultures were shaken at 220 rpm at 37 °C until an optical density of OD<sub>600</sub> = 0.7 – 1.0 was reached. The cultures were cooled to 20 °C (20 min) and then induced with 5-aminolevulinic, IPTG and FeSO<sub>4</sub>·7H<sub>2</sub>O to final concentrations of 1.0 mM, 0.5 mM and 0.05 mM, respectively. The cultures were allowed to continue for another 20 hours at 20 °C and shaking at 220 rpm. Cell were harvested by centrifugation (4 °C, 15 min, 4,200 rpm), and the cell pellet was resuspended to 50 mM kPi (pH = 8.0) to required optical density of OD<sub>600</sub>. Cells were disrupted by sonication (5 min, cycle = 1 s on/2 s off, 50% amplitude) and pelleted by centrifugation (4 °C, 15 min, 4200 rpm). The supernatant was used directly for subsequent reactions.

Clarified lysates containing the desired enzyme variants were prepared from 50 mL expression cultures according to the procedure described above.

### ***Initial screen of enzyme variants***

#### **Method A: Sth10**

Two 250 mL Erlenmeyer flasks were each charged with 47.5 mL of whole cell transformation expressing Sth10. A pre-dissolved solution of **12** (5 mg, 0.020 mmol, 0.40 mM final concentration) in 2.5 mL DMSO was added to the inducible medium, followed by 5-ALA to final concentration of 1.0 mM. The flasks were shaken at 220 rpm at 30 °C under air for 72 h. The mixture was extracted with EtOAc (50 mL × 3) and combined organic extracts were washed with sat. aq. NaHCO<sub>3</sub> (50 mL), dried over anhydrous Na<sub>2</sub>SO<sub>4</sub>, and concentrated *in vacuo*. Percentage conversion of the reaction was calculated based on <sup>1</sup>H NMR analysis of product: starting material ratio.

#### **Method B: AndA Mutants and Trt7**

A 250 mL Erlenmeyer flask was charged with 47.5 mL of clarified lysate of *E. coli* expressing AndA mutants and Trt7 ( $OD_{600} = 30/60$ ). A pre-dissolved solution of **12** (12.5 mg, 0.050 mmol, 1.0 mM final concentration) in 2.5 mL DMSO was added to the lysate, followed by ascorbic acid sodium salt (21.3 mg, 0.11 mmol, 2.1 equiv.),  $\alpha$ -ketoglutaric acid (disodium salt dihydrate, 125 mg, 0.66 mmol, 13.2 equiv.) and  $FeSO_4 \cdot 7H_2O$  (7.0 mg, 0.025 mmol, 0.5 equiv.). The flask was shaken at 150 rpm at 30 °C under air for 20 h. Then, 5 g NaCl was added to flask and the mixture was extracted with EtOAc (50 mL  $\times$  3). The combined organic extracts were washed with sat. aq.  $NaHCO_3$  (50 mL), dried over anhydrous  $Na_2SO_4$ , and concentrated *in vacuo*. Percentage conversion of the reaction was calculated based on  $^1H$  NMR analysis of product: starting material ratio.

#### **Method C: Bacterial P450**

A 250 mL Erlenmeyer flask was charged with 47.5 mL of clarified lysate of *E. coli* co-expressing bacterial P450 and Opt13 ( $OD_{600} = 30$ ). A pre-dissolved solution of **12** (25.0 mg, 0.10 mmol, 2 mM final concentration) in 2.5 mL DMSO was added to the lysate, followed by  $\cdot NaNADP$  (25.0 mg, 0.032 mmol, 0.34 equiv.) and  $Na_2HPO_3 \cdot 5H_2O$  (0.63 g, 2.89 mmol, 30.6 equiv.). The flask was shaken at 150 rpm at 23 °C under air for 20 h. Then, 5 g NaCl was added to flask and the mixture was extracted with EtOAc (50 mL  $\times$  3). The combined organic extracts were washed with sat. aq.  $NaHCO_3$  (50 mL), dried over anhydrous  $Na_2SO_4$ , and concentrated *in vacuo*. Percentage conversion of the reaction was calculated based on  $^1H$  NMR analysis of product: starting material ratio.



**Figure S1.** The ORTEP drawings of **14**, **15**, **17**, **18**, **20**, **25**, **26**, **30**, **35**, **36** and **40**.

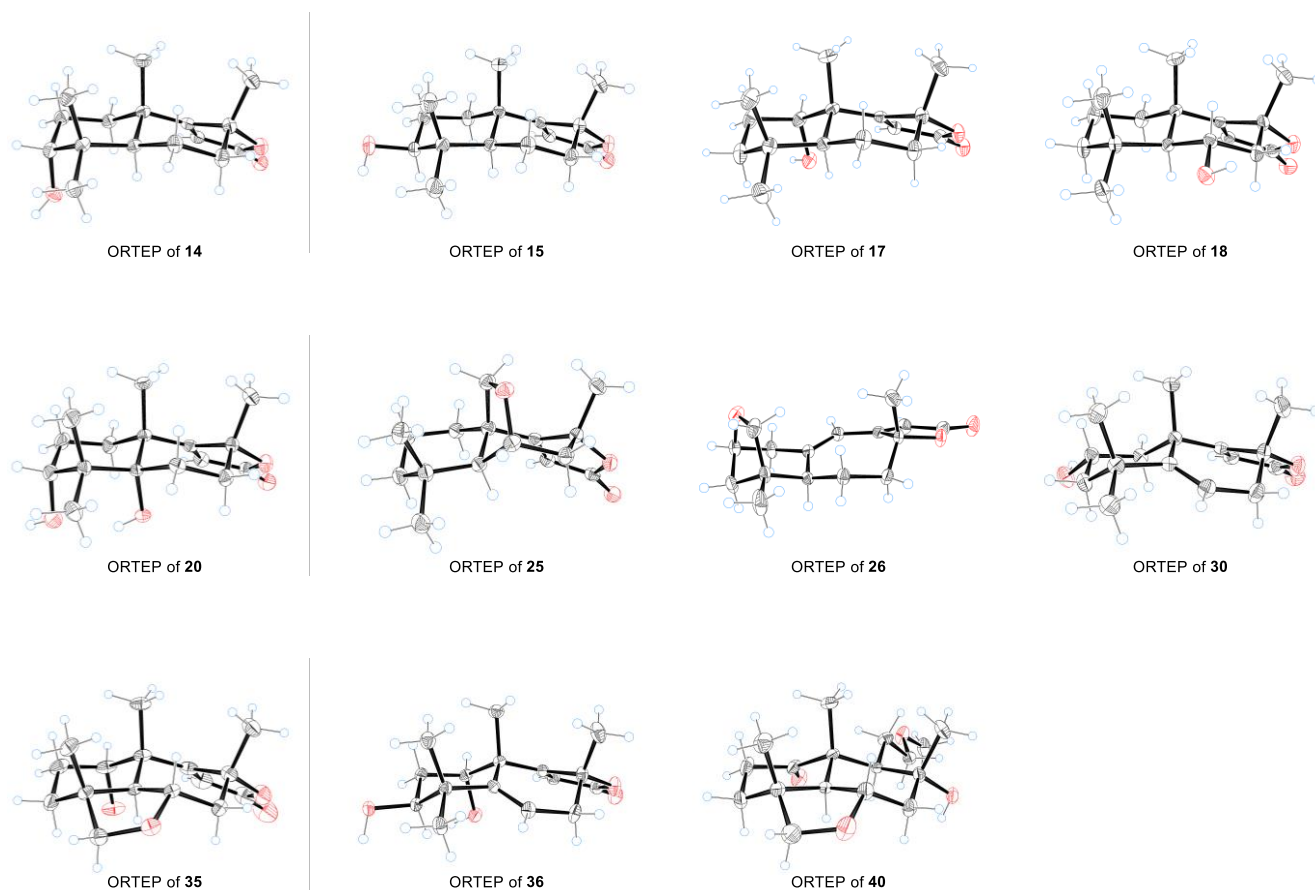

Crystallographic data for the structure reported in this article have been deposited at the Cambridge Crystallographic Data Centre, under deposition nos. CCDC 2348093 (**14**), CCDC 2348094 (**15**), CCDC 2348087 (**17**), CCDC 2348090 (**18**), CCDC 2348091 (**20**), CCDC 2348085 (**25**), CCDC 2348092 (**26**), CCDC 2348089 (**30**), CCDC 2348086 (**35**), CCDC 2348088 (**36**) and CCDC 2348161 (**40**). Copies of the data can be obtained free of charge via <https://www.ccdc.cam.ac.uk/structures>.

## Synthetic procedures

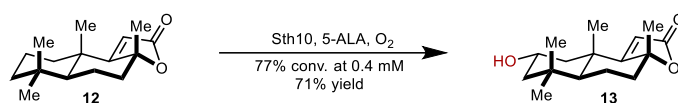

Compound **13** was prepared according to the general procedure. The crude material was purified by flash column chromatography (4: 1 to 3: 2 petroleum ether: EtOAc) to yield compound **13** (7.6 mg, 77% conversion, 71% yield) as a white powder.

Gram-scale synthesis of compound **13**:

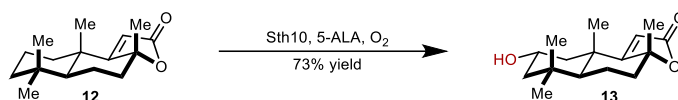

Thirty 2 L Erlenmeyer flasks were each charged with 474 mL of whole cell transformation expressing Sth10. A pre-dissolved solution of **12** (50 mg, 0.20 mmol, 0.40 mM final concentration) in 25 mL DMSO was added to the inducible medium, followed by 5-ALA to final concentration of 1.0 mM. The flasks were shaken at 220 rpm at 30 °C under air for 72 h. The mixture was extracted with EtOAc (400 mL × 3) and combined organic extracts were washed with sat. aq. NaHCO<sub>3</sub> (400 mL), dried over anhydrous Na<sub>2</sub>SO<sub>4</sub>, and concentrated *in vacuo*. The crude material was purified by flash column chromatography (4: 1 to 3: 2 petroleum ether: EtOAc) to yield compound **13** (1.17 g, 73% yield) as white powder.

**<sup>1</sup>H NMR (500 MHz, CDCl<sub>3</sub>):** δ 5.56 (s, 1H), 4.12 – 4.04 (m, 1H), 2.32 (dd, *J* = 9.1, 2.8 Hz, 1H), 2.18 (ddd, *J* = 12.0, 4.1, 2.3 Hz, 1H), 1.90 – 1.82 (m, 2H), 1.56 (s, 3H), 1.55 – 1.49 (m, 3H), 1.44 (dd, *J* = 11.6, 11.6 Hz, 1H), 1.23 (s, 3H), 1.17 (dd, *J* = 12.1, 12.1 Hz, 1H), 0.97 (s, 3H), 0.96 (s, 3H).

**<sup>13</sup>C NMR (126 MHz, CDCl<sub>3</sub>):** δ 183.3, 172.2, 110.0, 87.1, 64.5, 55.4, 51.1, 46.2, 41.2, 40.8, 35.5, 33.6, 25.6, 22.6, 19.3, 19.2.

**HRMS (*m/z*):** [M+Na]<sup>+</sup> calcd for C<sub>16</sub>H<sub>24</sub>O<sub>3</sub>Na<sup>+</sup> 287.1618, found 287.1620.

**[α]<sub>D</sub><sup>20</sup>** = −159.1 (*c* = 0.5, MeOH)

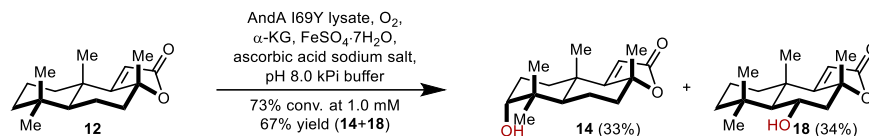

Compound **14** and **18** was prepared according to the general procedure (AndA I69Y, OD<sub>600</sub> = 30). The crude material was purified by flash column chromatography (4: 1 to 3: 2 petroleum ether: EtOAc) to yield compound **14** (4.4 mg, 36% conversion, 33% yield) and **18** (4.5 mg, 37% conversion, 34% yield) as white solid.

(Compound **14**)<sup>1</sup>H NMR (500 MHz, CDCl<sub>3</sub>): δ 5.55 (s, 1H), 3.50 – 3.47 (m, 1H), 2.30 (dd, *J* = 9.3, 2.8 Hz, 1H), 2.08 – 2.04 (m, 2H), 1.77 – 1.68 (m, 2H), 1.55 (s, 3H), 1.54 – 1.44 (m, 4H), 1.19 (s, 3H), 0.98 (s, 3H), 0.93 (s, 3H).

<sup>13</sup>C NMR (126 MHz, CDCl<sub>3</sub>): δ 184.1, 172.5, 109.7, 87.3, 75.4, 48.6, 40.9, 39.6, 38.5, 30.3, 28.5, 25.5, 25.2, 22.0, 19.3, 18.1.

HRMS (*m/z*): [M+H]<sup>+</sup> calcd for C<sub>16</sub>H<sub>24</sub>O<sub>3</sub>H<sup>+</sup> 265.1798, found 265.1801.

[α]<sub>D</sub><sup>20</sup> = −188.8 (*c* = 0.5, MeOH)

[*m.p.*] = 185–187 °C

(Compound **18**)<sup>1</sup>H NMR (500 MHz, CDCl<sub>3</sub>): δ 5.55 (s, 1H), 4.14 (ddd, *J* = 11.0, 11.0, 3.9 Hz, 1H), 2.55 (dd, *J* = 11.8, 3.8 Hz, 1H), 1.77 – 1.69 (m, 2H), 1.62 – 1.48 (m, 6H), 1.45 – 1.40 (m, 1H), 1.31 – 1.23 (m, 1H), 1.22 (s, 3H), 1.16 (s, 3H), 1.08 (s, 3H), 1.06 (d, *J* = 10.7 Hz, 1H).

<sup>13</sup>C NMR (126 MHz, CDCl<sub>3</sub>): δ 183.5, 172.3, 110.1, 86.0, 68.3, 59.8, 50.8, 43.6, 38.9, 37.5, 36.1, 34.7, 26.7, 22.0, 19.1, 18.1.

HRMS (*m/z*): [M+H]<sup>+</sup> calcd for C<sub>16</sub>H<sub>24</sub>O<sub>3</sub>H<sup>+</sup> 265.1798, found 265.1802.

[α]<sub>D</sub><sup>20</sup> = −103.7 (*c* = 0.5, MeOH)

[*m.p.*] = 110–112 °C

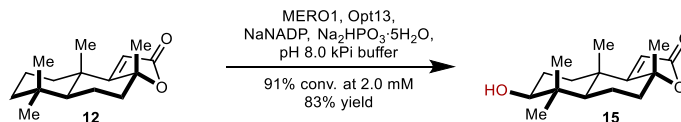

Compound **15** was prepared according to the general procedure (MERO1, OD<sub>600</sub> = 30). The crude material was purified by flash column chromatography (4: 1 to 3: 2 petroleum ether: EtOAc) to yield compound **15** (22.1 mg, 91% conversion, 83% yield) as a white solid.

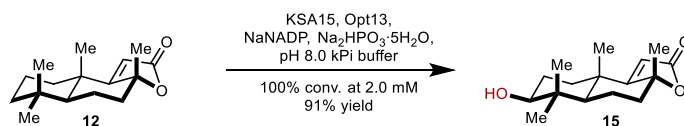

Compound **15** was prepared according to the general procedure (KSA15, OD<sub>600</sub> = 30). The crude material was purified by flash column chromatography (4: 1 to 3: 2 petroleum ether: EtOAc) to yield compound **15** (24.3 mg, 91% conversion, 91% yield) as a white solid.

Gram-scale synthesis of compound **15**:

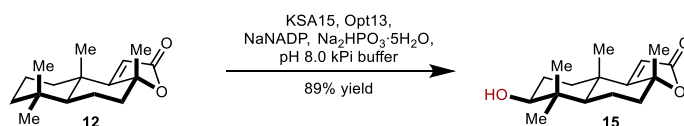

Six 2 L Erlenmeyer flasks were each charged with 475 mL of clarified lysate of *E. coli* co-expressing KSA15 and Opt13 (OD<sub>600</sub> = 30). A pre-dissolved solution of **12** (250 mg, 1.0 mmol, 2.0 mM final concentration) in 25 mL DMSO was added to the lysate, followed by NaNADP (250 mg, 0.32 mmol, 0.32 equiv.) and Na<sub>2</sub>HPO<sub>3</sub>·5H<sub>2</sub>O (6.25 g, 28.9 mmol, 28.9 equiv.). The flasks were shaken at 150 rpm at 23 °C under air for 20 h. Then, 25 g NaCl was added to flask and the mixture was extracted with EtOAc (400 mL × 3). The combined organic extracts were washed with sat. aq. NaHCO<sub>3</sub> (400 mL), dried over anhydrous Na<sub>2</sub>SO<sub>4</sub>, and concentrated *in vacuo*. The crude material was purified by flash column chromatography (4: 1 to 3: 2 petroleum ether: EtOAc) to yield compound **15** (1.42 g, 89% yield) as a white solid.

**<sup>1</sup>H NMR (500 MHz, CDCl<sub>3</sub>):** δ 5.52 (s, 1H), 3.25 (dd, *J* = 11.1, 4.4 Hz, 1H), 2.30 (ddd, *J* = 12.3, 2.8, 2.8 Hz, 1H), 1.87 – 1.77 (m, 3H), 1.77 – 1.62 (m, 2H), 1.57 – 1.44 (m, 5H), 1.19 (s, 3H), 1.01 (s, 3H), 0.93 (dd, *J* = 12.0, 2.5 Hz, 1H), 0.88 (s, 3H).

**<sup>13</sup>C NMR (126 MHz, CDCl<sub>3</sub>):** δ 184.0, 172.3, 109.9, 87.2, 78.2, 54.8, 40.6, 39.8, 39.5, 35.4, 28.3, 27.0, 25.4, 19.4, 18.3, 15.6.

**HRMS ( $m/z$ ):**  $[M+H]^+$  calcd for  $C_{16}H_{24}O_3H^+$  265.1798, found 265.1800.

$[\alpha]_D^{20} = -152.8$  ( $c = 0.5$ , MeOH)

**[m.p.]** = 155–157 °C

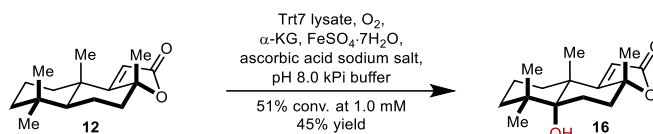

Compound **15** was prepared according to the general procedure ( $OD_{600} = 60$ ). The crude material was purified by flash column chromatography (4: 1 to 3: 2 petroleum ether: EtOAc) to yield compound **15** (6.0 mg, 51% conversion, 45% yield) as white powder.

Gram-scale synthesis of compound **16**:

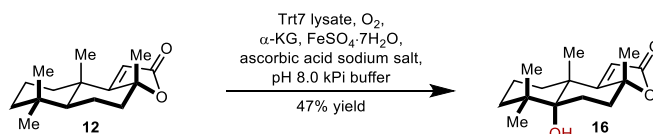

Twenty 2 L Erlenmeyer flasks were each charged with 475 mL of clarified lysate of *E. coli* expressing Trt7 ( $OD_{600} = 60$ ). A pre-dissolved solution of **12** (125 mg, 0.50 mmol, 1.0 mM final concentration) in 25 mL DMSO was added to the lysate, followed by ascorbic acid sodium salt (426 mg, 2.15 mmol, 4.3 equiv.),  $\alpha$ -ketoglutaric acid (disodium salt dihydrate, 2.50 g, 13.3 mmol, 26.6 equiv.) and  $FeSO_4 \cdot 7H_2O$  (140 mg, 0.50 mmol, 1.0 equiv.). The flasks were shaken at 150 rpm at 30 °C under air for 20 h. Then, 5 g NaCl was added to flask and the mixture was extracted with EtOAc (400 mL  $\times$  3). The combined organic extracts were washed with sat. aq.  $NaHCO_3$  (400 mL), dried over anhydrous  $Na_2SO_4$ , and concentrated *in vacuo*. The crude material was purified by flash column chromatography (4: 1 to 7: 3 petroleum ether: EtOAc) to yield compound **16** (1.25 g, 47% yield) as white powder.

**$^1H$  NMR (500 MHz,  $CDCl_3$ ):**  $\delta$  5.57 (s, 1H), 2.09 – 1.94 (m, 3H), 1.91 (ddd,  $J = 14.4, 12.9, 4.8$  Hz, 1H), 1.86 – 1.68 (m, 3H), 1.63 – 1.58 (m, 4H), 1.47 – 1.41 (m, 1H), 1.36 (s, 3H), 1.24 – 1.19 (m, 1H), 1.09 (s, 3H), 0.93 (s, 3H).

$^{13}\text{C}$  NMR (126 MHz,  $\text{CDCl}_3$ ):  $\delta$  182.9, 172.5, 112.5, 86.6, 78.3, 44.2, 38.6, 35.9, 35.0, 30.5, 27.9, 26.5, 24.5, 23.6, 22.0, 17.6.

HRMS ( $m/z$ ):  $[\text{M}+\text{H}]^+$  calcd for  $\text{C}_{16}\text{H}_{24}\text{O}_3\text{H}^+$  265.1798, found 265.1799.

$[\alpha]_{\text{D}}^{25} = -153.0$  ( $c = 0.05$ , MeOH)

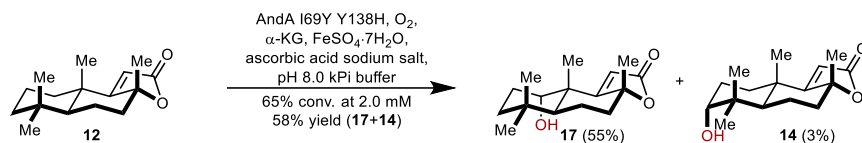

Compound **17** was prepared according to the general procedure ( $\text{OD}_{600} = 30$ ). The crude material was purified by flash column chromatography (4: 1 to 3: 2 petroleum ether: EtOAc) to yield compound **17** (14.7 mg, 60% conversion, 55% yield) and compound **14** (0.8 mg, 5% conversion, 3% yield) as white solid.

Gram-scale synthesis of compound **17**:

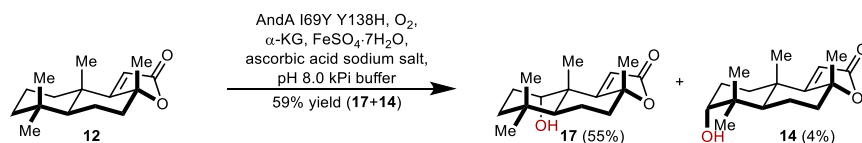

Eight 2 L Erlenmeyer flasks were each charged with 475 mL of clarified lysate of *E. coli* expressing AndA-I69Y Y138H ( $\text{OD}_{600} = 30$ ). A pre-dissolved solution of **12** (250 mg, 1.0 mmol, 2.0 mM final concentration) in 25 mL DMSO was added to the lysate, followed by ascorbic acid sodium salt (213 mg, 1.08 mmol, 1.1 equiv.),  $\alpha$ -ketoglutaric acid (disodium salt dihydrate, 1.25 g, 6.65 mmol, 6.6 equiv.) and  $\text{FeSO}_4 \cdot 7\text{H}_2\text{O}$  (70 mg, 0.25 mmol, 0.25 equiv.). The flasks were shaken at 150 rpm at 30 °C under air for 20 h. Then, 25 g NaCl was added to flask and the mixture was extracted with EtOAc (400 mL  $\times$  3). The combined organic extracts were washed with sat. aq.  $\text{NaHCO}_3$  (400 mL), dried over anhydrous  $\text{Na}_2\text{SO}_4$ , and concentrated *in vacuo*. The crude material was purified by flash column chromatography (4: 1 to 3: 2 petroleum ether: EtOAc) to yield compound **15** (1.17 g, 55% yield) and **14** (89.3 mg, 4% yield) as white solid.

(Compound **17**) **<sup>1</sup>H NMR (500 MHz, CDCl<sub>3</sub>):**  $\delta$  5.88 (s, 1H), 4.05 – 4.01 (m, 1H), 2.25 – 2.20 (m, 1H), 2.16 (m, 1H), 1.90 – 1.82 (m, 1H), 1.72 (ddd,  $J = 14.4, 14.4, 4.7$  Hz, 1H), 1.62 – 1.57 (m, 2H), 1.55 (s, 3H), 1.55 – 1.49 (m, 2H), 1.27 – 1.21 (m, 4H), 0.95 (s, 3H), 0.93 (s, 3H).

**<sup>13</sup>C NMR (126 MHz, CDCl<sub>3</sub>):**  $\delta$  178.9, 172.9, 112.4, 87.8, 71.2, 47.0, 44.9, 39.3, 34.3, 34.1, 33.4, 26.5, 26.0, 21.9, 19.6, 19.2.

**HRMS ( $m/z$ ):**  $[M+H]^+$  calcd for C<sub>16</sub>H<sub>24</sub>O<sub>3</sub>H<sup>+</sup> 265.1798, found 265.1800.

**$[\alpha]_D^{20}$**  = −72.2 ( $c = 0.5$ , MeOH)

**[m.p.]** = 171–173 °C

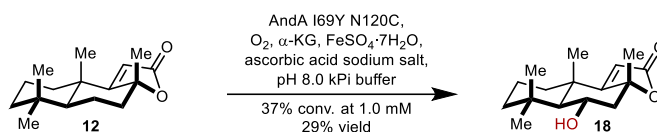

Compound **17** was prepared according to the general procedure ( $OD_{600} = 60$ ). The crude material was purified by flash column chromatography (4: 1 to 2: 1 petroleum ether: EtOAc) to yield compound **18** (3.9 mg, 37% conversion, 29% yield) as a white solid.

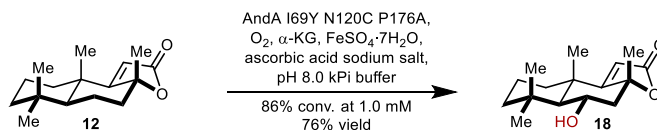

Compound **17** was prepared according to the general procedure ( $OD_{600} = 60$ ). The crude material was purified by flash column chromatography (4: 1 to 2: 1 petroleum ether: EtOAc) to yield compound **18** (10.2 mg, 86% conversion, 76% yield) as a white solid.

Gram-scale synthesis of compound **18**:

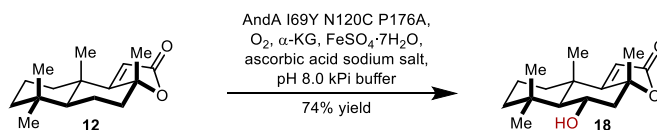

Twelve 2 L Erlenmeyer flasks were each charged with 475 mL of clarified lysate of *E. coli* expressing AndA-I69Y N120C P176A ( $OD_{600} = 60$ ). A pre-dissolved solution of **12** (125 mg, 0.50 mmol, 1.0 mM

final concentration) in 25 mL DMSO was added to the lysate, followed by ascorbic acid sodium salt (426 mg, 2.15 mmol, 4.3 equiv.),  $\alpha$ -ketoglutaric acid (disodium salt dihydrate, 2.5 g, 13.2 mmol, 26.4 equiv.) and  $\text{FeSO}_4 \cdot 7\text{H}_2\text{O}$  (140 mg, 0.50 mmol, 1.0 equiv.). The flasks were shaken at 150 rpm at 23 °C under air for 20 h. Then, 25 g NaCl was added to flask and the mixture was extracted with EtOAc (400 mL  $\times$  3). The combined organic extracts were washed with sat. aq.  $\text{NaHCO}_3$  (400 mL), dried over anhydrous  $\text{Na}_2\text{SO}_4$ , and concentrated *in vacuo*. The crude material was purified by flash column chromatography (4: 1 to 2: 1 petroleum ether: EtOAc) to yield compound **18** (1.18 g, 74% yield) as white powder.

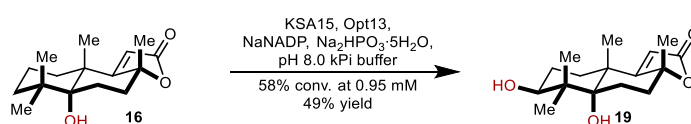

A 250 mL Erlenmeyer flask was charged with 47.5 mL of clarified lysate of *E. coli* co-expressing KSA15 and Opt13 ( $\text{OD}_{600} = 30$ ). A pre-dissolved solution of **16** (12.5 mg, 0.047 mmol, 0.95 mM final concentration) in 2.5 mL DMSO was added to the lysate, followed by NaNADP (25 mg, 0.032 mmol, 0.67 equiv.) and  $\text{Na}_2\text{HPO}_3 \cdot 5\text{H}_2\text{O}$  (0.63 g, 2.89 mmol, 61.2 equiv.). The flask was shaken at 150 rpm at 23 °C under air for 20 h. Then, 5 g NaCl was added to flask and the mixture was extracted with EtOAc (50 mL  $\times$  3). The combined organic extracts were washed with sat. aq.  $\text{NaHCO}_3$  (50 mL), dried over anhydrous  $\text{Na}_2\text{SO}_4$ , and concentrated *in vacuo*. The crude material was purified by flash column chromatography (7: 3 to 1: 2 petroleum ether: EtOAc) to yield compound **19** (6.5 mg, 49% yield) as white powder.

**$^1\text{H}$  NMR (500 MHz, Methanol- $d_4$ ):**  $\delta$  5.55 (s, 1H), 3.82 (dd,  $J = 11.2, 5.9$  Hz, 1H), 2.23 (ddd,  $J = 12.9, 12.9, 5.3$  Hz, 1H), 2.13 – 1.99 (m, 3H), 1.84 – 1.74 (m, 3H), 1.60 (s, 3H), 1.48 (ddd,  $J = 13.0, 3.5, 3.5$  Hz, 1H), 1.37 (s, 3H), 1.03 (s, 3H), 0.99 (s, 3H).

**$^{13}\text{C}$  NMR (126 MHz, Methanol- $d_4$ ):**  $\delta$  186.3, 175.2, 112.3, 88.6, 80.7, 74.2, 45.3, 45.0, 35.2, 30.5, 27.5, 26.8, 25.7, 23.3, 22.3, 17.7.

**HRMS ( $m/z$ ):**  $[\text{M}+\text{H}]^+$  calcd for  $\text{C}_{16}\text{H}_{24}\text{O}_4\text{H}^+$  281.1747, found 281.1751.

**$[\alpha]_D^{20}$**  =  $-108.6$  ( $c = 0.5$ , MeOH)



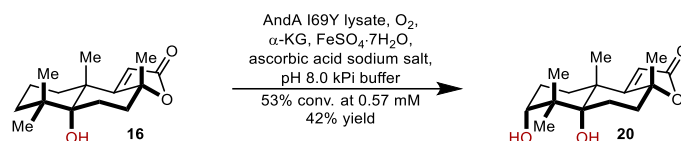

Two 250 mL Erlenmeyer flasks were each charged with 47.5 mL of clarified lysate of *E. coli* expressing AndA-I69Y (OD<sub>600</sub> = 60). A pre-dissolved solution of **16** (7.5 mg, 0.028 mmol, 0.57 mM final concentration) in 2.5 mL DMSO was added to the lysate, followed by ascorbic acid sodium salt (42.6 mg, 0.22 mmol, 7.6 equiv.),  $\alpha$ -ketoglutaric acid (disodium salt dihydrate, 250 mg, 1.33 mmol, 46.8 equiv.) and FeSO<sub>4</sub>·7H<sub>2</sub>O (14.0 mg, 0.050 mmol, 1.8 equiv.). The flasks were shaken at 150 rpm at 30 °C under air for 20 h. Then, 5 g NaCl was added to flask and the mixture was extracted with EtOAc (50 mL  $\times$  3). The combined organic extracts were washed with sat. aq. NaHCO<sub>3</sub> (50 mL), dried over anhydrous Na<sub>2</sub>SO<sub>4</sub>, and concentrated *in vacuo*. The crude material was purified by flash column chromatography (2: 1 to 2: 3 petroleum ether: EtOAc) to yield compound **20** (6.7 mg, 42% yield) as a white solid.

**<sup>1</sup>H NMR (500 MHz, Methanol-*d*<sub>4</sub>):**  $\delta$  5.59 (s, 1H), 3.54 (dd,  $J$  = 2.7, 2.7 Hz, 1H), 2.34 (ddd,  $J$  = 13.4, 13.4, 3.2 Hz, 1H), 2.28 – 2.20 (m, 1H), 2.04 (dd,  $J$  = 13.0, 4.7 Hz, 1H), 2.00 – 1.92 (m, 2H), 1.81 – 1.73 (m, 2H), 1.61 (s, 3H), 1.41 – 1.36 (m, 4H), 1.11 (s, 3H), 1.06 (s, 3H).

**<sup>13</sup>C NMR (126 MHz, Methanol-*d*<sub>4</sub>):**  $\delta$  186.6, 175.3, 112.1, 88.7, 81.1, 77.8, 45.7, 42.0, 34.9, 26.9, 26.5, 26.0, 25.7, 24.5, 23.4, 22.9.

**HRMS ( $m/z$ ):** [M+H]<sup>+</sup> calcd for C<sub>16</sub>H<sub>24</sub>O<sub>4</sub>H<sup>+</sup> 281.1747, found 281.1749.

**$[\alpha]_D^{20}$**  = –166.0 ( $c$  = 0.5, MeOH)

**[m.p.]** = 264–266 °C

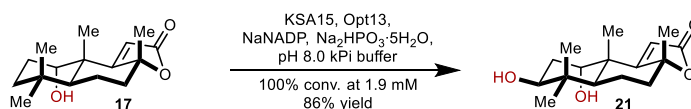

A 250 mL Erlenmeyer flask was charged with 47.5 mL of clarified lysate of *E. coli* co-expressing KSA15 and Opt13 (OD<sub>600</sub> = 30). A pre-dissolved solution of **17** (25.0 mg, 0.095 mmol, 1.9 mM final concentration) in 2.5 mL DMSO was added to the lysate, followed by NaNADP (25.0 mg, 0.032 mmol, 0.34 equiv.) and Na<sub>2</sub>HPO<sub>3</sub>·5H<sub>2</sub>O (0.63 g, 2.89 mmol, 30.6 equiv.). The flask was shaken at 150 rpm at 23 °C under air for 20 h. Then, 5 g NaCl was added to flask and the mixture was extracted with EtOAc (50 mL × 3). The combined organic extracts were washed with sat. aq. NaHCO<sub>3</sub> (50 mL), dried over anhydrous Na<sub>2</sub>SO<sub>4</sub>, and concentrated *in vacuo*. The crude material was purified by flash column chromatography (2: 1 to 3: 2 petroleum ether: EtOAc) to yield compound **21** (22.9 mg, 86% yield) as white powder.

**<sup>1</sup>H NMR (500 MHz, Methanol-*d*<sub>4</sub>):** δ 5.84 (s, 1H), 4.06 (s, 1H), 3.72 (dd, *J* = 12.1, 4.7 Hz, 1H), 2.24 (ddd, *J* = 12.3, 2.9, 2.9 Hz, 1H), 2.10 (m, 1H), 1.94 – 1.88 (m, 1H), 1.85 (ddd, *J* = 14.0, 4.2, 4.2 Hz, 1H), 1.75 – 1.65 (m, 1H), 1.60 (d, *J* = 19.2 Hz, 4H), 1.47 (ddd, *J* = 12.8, 12.8, 3.9 Hz, 1H), 1.25 (s, 3H), 1.04 (s, 3H), 0.89 (s, 3H).

**<sup>13</sup>C NMR (126 MHz, Methanol-*d*<sub>4</sub>):** δ 181.4, 175.3, 113.3, 89.7, 73.4, 72.6, 47.6, 45.7, 40.9, 40.1, 35.4, 28.8, 26.6, 20.1, 19.9, 16.1.

**HRMS (*m/z*):** [M+H]<sup>+</sup> calcd for C<sub>16</sub>H<sub>24</sub>O<sub>4</sub>H<sup>+</sup> 281.1747, found 281.1751.

**[α]<sub>D</sub><sup>20</sup>** = −69.4 (*c* = 0.5, MeOH)

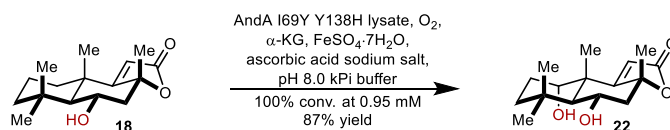

A 250 mL Erlenmeyer flask was charged with 47.5 mL of clarified lysate of *E. coli* expressing AndA-L69Y Y138H (OD<sub>600</sub> = 30). A pre-dissolved solution of **16** (12.5 mg, 0.047 mmol, 0.95 mM final concentration) in 2.5 mL DMSO was added to the lysate, followed by ascorbic acid sodium salt (21.3 mg, 0.11 mmol, 2.3 equiv.), α-ketoglutaric acid (disodium salt dihydrate, 125 mg, 0.66 mmol, 14.1 equiv.) and FeSO<sub>4</sub>·7H<sub>2</sub>O (7.0 mg, 0.025 mmol, 0.53 equiv.). The flask was shaken at 150 rpm at 30 °C under air for 20 h. Then, 5 g NaCl was added to flask and the mixture was extracted with EtOAc (50 mL × 3). The

combined organic extracts were washed with sat. aq. NaHCO<sub>3</sub> (50 mL), dried over anhydrous Na<sub>2</sub>SO<sub>4</sub>, and concentrated *in vacuo*. The crude material was purified by flash column chromatography (2: 1 to 2: 3 petroleum ether: EtOAc) to yield compound **20** (11.5 mg, 87% yield) as white powder.

**<sup>1</sup>H NMR (500 MHz, Methanol-*d*<sub>4</sub>):** δ 5.93 (s, 1H), 4.14 (ddd, *J* = 11.0, 11.0, 3.6 Hz, 1H), 3.94 – 3.90 (m, 1H), 2.42 (dd, *J* = 11.8, 3.6 Hz, 1H), 2.23 – 2.13 (m, 1H), 1.87 (ddd, *J* = 14.1, 14.1, 4.6 Hz, 1H), 1.69 (d, *J* = 11.0 Hz, 1H), 1.62 (m, 4H), 1.58 – 1.50 (m, 1H), 1.29 (s, 3H), 1.20 (s, 3H), 1.17 – 1.10 (m, 4H).

**<sup>13</sup>C NMR (126 MHz, Methanol-*d*<sub>4</sub>):** δ 180.9, 175.2, 113.6, 88.3, 71.9, 68.2, 52.5, 50.2, 45.0, 37.4, 36.8, 35.3, 27.8, 26.5, 22.7, 20.6.

**HRMS (*m/z*):** [M+H]<sup>+</sup> calcd for C<sub>16</sub>H<sub>24</sub>O<sub>4</sub>H<sup>+</sup> 281.1747, found 281.1750.

**[α]<sub>D</sub><sup>20</sup>** = −27.0 (*c* = 0.2, MeOH)

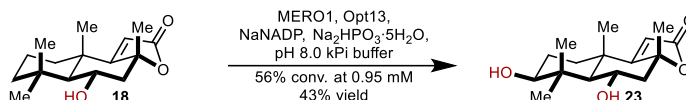

A 250 mL Erlenmeyer flask was charged with 47.5 mL of clarified lysate of *E. coli* co-expressing Mero1 and Opt13 (OD<sub>600</sub> = 30). A pre-dissolved solution of **18** (12.5 mg, 0.047 mmol, 0.95 mM final concentration) in 2.5 mL DMSO was added to the lysate, followed by NaNADP (25 mg, 0.032 mmol, 0.67 equiv.) and Na<sub>2</sub>HPO<sub>3</sub>·5H<sub>2</sub>O (0.63 g, 2.89 mmol, 61.2 equiv.). The flask was shaken at 150 rpm at 23 °C under air for 20 h. Then, 5 g NaCl was added to flask and the mixture was extracted with EtOAc (50 mL × 3). The combined organic extracts were washed with sat. aq. NaHCO<sub>3</sub> (50 mL), dried over anhydrous Na<sub>2</sub>SO<sub>4</sub>, and concentrated *in vacuo*. The crude material was purified by flash column chromatography (2: 1 to 3: 2 petroleum ether: EtOAc) to yield compound **21** (5.7 mg, 43% yield) as white powder.

**<sup>1</sup>H NMR (500 MHz, Methanol-*d*<sub>4</sub>):** δ 5.64 (s, 1H), 4.20 (ddd, *J* = 11.0, 11.0, 3.7 Hz, 1H), 3.17 (dd, *J* = 10.0, 5.6 Hz, 1H), 2.48 (dd, *J* = 11.9, 3.7 Hz, 1H), 1.82 – 1.69 (m, 4H), 1.64 – 1.55 (m, 4H), 1.29 (s, 3H), 1.27 (s, 3H), 1.07 (d, *J* = 10.7 Hz, 1H), 1.03 (s, 3H).

**<sup>13</sup>C NMR (126 MHz, Methanol-*d*<sub>4</sub>):** δ 185.6, 174.4, 110.8, 88.1, 79.0, 68.2, 59.8, 51.4, 41.4, 39.9, 36.5, 30.8, 27.3, 26.7, 19.4, 16.2.

**HRMS (*m/z*):** [M+Na]<sup>+</sup> calcd for C<sub>16</sub>H<sub>24</sub>O<sub>4</sub>Na<sup>+</sup> 303.1567, found 303.1572.

[α]<sub>D</sub><sup>20</sup> = −76.3 (*c* = 0.5, MeOH)

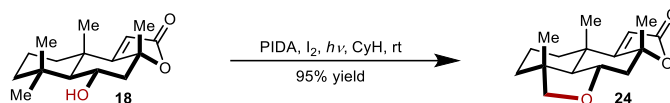

Compound **18** (1.50 g, 5.67 mmol, 1.0 equiv.), PIDA (2.56 g, 7.94 mmol, 1.4 equiv.) and I<sub>2</sub> (1.73 g, 6.81 mmol, 1.2 equiv.) was dissolved in CyH (100 mL). The solution was irradiated with a flood lamp (200 W) at room temperature for 30 min. The reaction was quenched by sat. aq. Na<sub>2</sub>S<sub>2</sub>O<sub>3</sub> (20 mL) and extracted with EtOAc (100 mL × 3). The combined organic extracts were washed with brine, dried over anhydrous Na<sub>2</sub>SO<sub>4</sub>, filtered, and concentrated *in vacuo*. The crude material was purified by flash column chromatography (7: 3 petroleum: EtOAc) to yield **24** (1.42 g, 95% yield) as white powder.

**<sup>1</sup>H NMR (500 MHz, Acetone-*d*<sub>6</sub>):** δ 5.67 (s, 1H), 4.08 (ddd, *J* = 11.1, 11.1, 4.4 Hz, 1H), 3.62 (d, *J* = 7.3 Hz, 1H), 3.46 (d, *J* = 7.4 Hz, 1H), 2.60 (dd, *J* = 11.1, 4.4 Hz, 1H), 1.94 – 1.83 (m, 2H), 1.75 – 1.69 (m, 2H), 1.55 (s, 4H), 1.47 (dd, *J* = 10.8, 10.8 Hz, 1H), 1.30 – 1.24 (m, 5H), 1.18 (s, 3H).

**<sup>13</sup>C NMR (126 MHz, Acetone-*d*<sub>6</sub>):** δ 184.0, 171.7, 111.5, 87.9, 84.7, 72.0, 61.4, 47.0, 40.6, 38.1, 37.8, 36.3, 26.9, 19.9, 19.3, 17.8.

**HRMS (*m/z*):** [M+H]<sup>+</sup> calcd for C<sub>16</sub>H<sub>22</sub>O<sub>3</sub>H<sup>+</sup> 263.1642, found 263.1645.

[α]<sub>D</sub><sup>20</sup> = −82.5 (*c* = 0.5, MeOH)

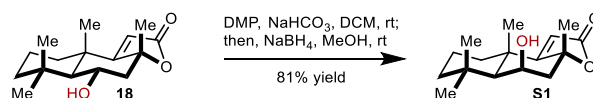

To a stirred solution of compound **13** (185 mg, 0.70 mmol, 1.0 equiv.) and NaHCO<sub>3</sub> (147 mg, 1.75 mmol, 2.5 equiv.) in DCM (8 mL) was added DMP (594 mg, 0.73 mmol, 2 equiv.) at 0 °C. After stirring at room

temperature for 2 h, the reaction was quenched by sat. aq. NaHCO<sub>3</sub> (10 mL) and Na<sub>2</sub>S<sub>2</sub>O<sub>3</sub> (10 mL). Then, the mixture was extracted with DCM (20 mL × 3). The combined organic extracts were washed with brine, dried over anhydrous Na<sub>2</sub>SO<sub>4</sub>, filtered, and concentrated *in vacuo*. The crude material was redissolved in MeOH (10 mL), NaBH<sub>4</sub> (29.1 mg, 0.77 mmol, 1.1 equiv.) was added at 0 °C. After stirring at room temperature for 30 min, the reaction was quenched by brine and extracted with DCM (20 mL × 3). The combined organic extracts were dried over anhydrous Na<sub>2</sub>SO<sub>4</sub>, filtered, and concentrated *in vacuo*. The crude material was purified by flash column chromatography (7: 3 petroleum: EtOAc) to yield **S1** (150 mg, 81% yield) as white powder.

**<sup>1</sup>H NMR (500 MHz, CDCl<sub>3</sub>):** δ 5.56 (s, 1H), 4.61 – 4.55 (m, 1H), 2.46 (dd, *J* = 13.8, 2.7 Hz, 1H), 1.84 (ddd, *J* = 13.8, 3.4, 3.4 Hz, 4H), 1.78 – 1.69 (m, 2H), 1.60 (ddd, *J* = 14.2, 3.4, 3.4 Hz, 1H), 1.56 (s, 3H), 1.51 (ddd, *J* = 13.2, 13.2, 3.7 Hz, 1H), 1.44 (d, *J* = 13.2 Hz, 1H), 1.27 (s, 3H), 1.20 (ddd, *J* = 13.4, 13.4, 3.9 Hz, 1H), 1.00 (s, 3H), 0.97 (d, *J* = 2.1 Hz, 1H).

**<sup>13</sup>C NMR (126 MHz, CDCl<sub>3</sub>):** <sup>13</sup>C NMR (126 MHz, CDCl<sub>3</sub>) δ 185.4, 172.6, 110.1, 86.9, 67.3, 56.9, 48.4, 43.9, 39.8, 39.7, 35.1, 33.3, 27.5, 24.0, 20.2, 18.5.

**HRMS (*m/z*):** [M+H]<sup>+</sup> calcd for C<sub>16</sub>H<sub>24</sub>O<sub>3</sub>H<sup>+</sup> 265.1798, found 265.1801.

**[α]<sub>D</sub><sup>20</sup>** = −162.8 (*c* = 0.5, MeOH)

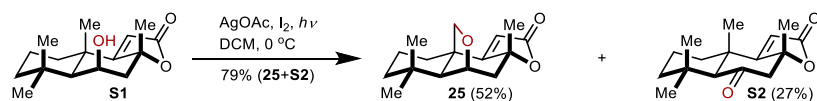

Compound **S1** (10 mg, 0.038 mmol, 1.0 equiv.), AgOAc (31.6 mg, 0.19 mmol, 5 equiv.) and I<sub>2</sub> (48.0 mg, 0.19 mmol, 5 equiv.) was dissolved in DCM (1 mL). The solution was irradiated with a flood lamp (150 W) at 0 °C for 1 h. The reaction was quenched by sat. aq. Na<sub>2</sub>S<sub>2</sub>O<sub>3</sub> (2 mL) and extracted with DCM (2 mL × 3). The combined organic extracts were washed with brine, dried over anhydrous Na<sub>2</sub>SO<sub>4</sub>, filtered, and concentrated *in vacuo*. The crude material was purified by flash column chromatography (3: 1 to 3: 2 petroleum: EtOAc) to yield **25** (5.2 mg, 52% yield) and **S2** (2.7 mg, 27% yield) as white powder.

(Compound **25**) **<sup>1</sup>H NMR (500 MHz, CDCl<sub>3</sub>):** δ 5.69 (s, 1H), 4.41 (d, *J* = 4.1 Hz, 1H), 3.88 (q, *J* = 9.0 Hz, 2H), 2.58 (dd, *J* = 13.3, 4.2 Hz, 1H), 1.90 – 1.83 (m, 2H), 1.78 (d, *J* = 13.4 Hz, 1H), 1.70 (s, 3H), 1.67 – 1.61 (m, 2H), 1.51 (ddd, *J* = 13.6, 3.1, 3.1 Hz, 1H), 1.30 (s, 1H), 1.22 – 1.14 (m, 1H), 1.04 (s, 3H), 0.94 (s, 3H).

**<sup>13</sup>C NMR (126 MHz, CDCl<sub>3</sub>):** δ 182.5, 172.1, 109.5, 87.3, 76.9, 69.5, 62.2, 48.5, 46.4, 39.5, 34.0, 32.1, 28.6, 25.2, 22.9, 17.8.

**HRMS (*m/z*):** [M+H]<sup>+</sup> calcd for C<sub>16</sub>H<sub>22</sub>O<sub>3</sub>H<sup>+</sup> 263.1642, found 263.1649.

**[α]<sub>D</sub><sup>20</sup>** = −171.7 (*c* = 0.2, MeOH)

**[m.p.]** = 140–142 °C

(Compound **S2**) **<sup>1</sup>H NMR (500 MHz, CDCl<sub>3</sub>):** δ 5.79 (s, 1H), 2.87 (d, *J* = 12.2 Hz, 1H), 2.74 (d, *J* = 12.2 Hz, 1H), 2.19 (s, 1H), 1.94 – 1.88 (m, 1H), 1.78 – 1.62 (m, 3H), 1.57 (s, 3H), 1.45 – 1.40 (m, 1H), 1.26 (s, 3H), 1.22 (s, 3H), 1.13 (ddd, *J* = 13.2, 13.2, 3.6 Hz, 1H), 0.95 (s, 3H).

**<sup>13</sup>C NMR (126 MHz, CDCl<sub>3</sub>):** δ 205.3, 180.7, 171.4, 111.6, 87.0, 63.4, 56.7, 42.4, 40.3, 37.3, 33.4, 32.3, 26.9, 21.6, 19.9, 18.0.

**HRMS (*m/z*):** [M+Na]<sup>+</sup> calcd for C<sub>16</sub>H<sub>22</sub>O<sub>3</sub>Na<sup>+</sup> 285.1461, found 285.1463.

**[α]<sub>D</sub><sup>20</sup>** = −126.9 (*c* = 0.5, MeOH)

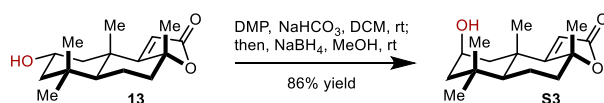

To a stirred solution of compound **13** (200 mg, 0.76 mmol, 1.0 equiv.) and NaHCO<sub>3</sub> (159 mg, 1.89 mmol, 2.5 equiv.) in DCM (10 mL) was added DMP (642 mg, 1.51 mmol, 2 equiv.) at 0 °C. After stirring at room temperature for 2 h, the reaction was quenched by sat. aq. NaHCO<sub>3</sub> (10 mL) and Na<sub>2</sub>S<sub>2</sub>O<sub>3</sub> (10 mL). Then, the mixture was extracted with DCM (20 mL × 3). The combined organic extracts were washed with brine, dried over anhydrous Na<sub>2</sub>SO<sub>4</sub>, filtered, and concentrated *in vacuo*. The crude material was re-dissolved in MeOH (10 mL), NaBH<sub>4</sub> (31.5 mg, 0.83 mmol, 1.1 equiv.) was added at 0 °C. After stirring

at room temperature for 30 min, the reaction was quenched by brine and extracted with DCM (20 mL  $\times$  3). The combined organic extracts were dried over anhydrous Na<sub>2</sub>SO<sub>4</sub>, filtered, and concentrated *in vacuo*. The crude material was purified by flash column chromatography (7: 3 petroleum: EtOAc) to yield **S3** (173 mg, 86% yield) as white powder.

**<sup>1</sup>H NMR (500 MHz, CDCl<sub>3</sub>):**  $\delta$  5.51 (s, 1H), 4.38 – 4.31 (m, 1H), 2.35 – 2.27 (m, 1H), 2.10 (d,  $J$  = 14.0 Hz, 1H), 1.90 – 1.84 (m, 1H), 1.76 (ddd,  $J$  = 14.9, 3.7, 3.7 Hz, 2H), 1.67 – 1.55 (m, 4H), 1.55 – 1.44 (m, 5H), 1.16 (s, 3H), 1.02 (dd,  $J$  = 12.2, 2.2 Hz, 1H), 0.93 (s, 3H).

**<sup>13</sup>C NMR (126 MHz, CDCl<sub>3</sub>):**  $\delta$  184.6, 172.4, 109.6, 87.4, 67.9, 55.5, 47.3, 42.3, 40.8, 39.8, 34.2, 33.6, 25.7, 23.5, 19.6, 19.5.

**HRMS ( $m/z$ ):** [M+H]<sup>+</sup> calcd for C<sub>16</sub>H<sub>24</sub>O<sub>3</sub>H<sup>+</sup> 265.1798, found 265.1797.

**$[\alpha]_D^{20}$**  = –135.9 ( $c$  = 0.5, MeOH)

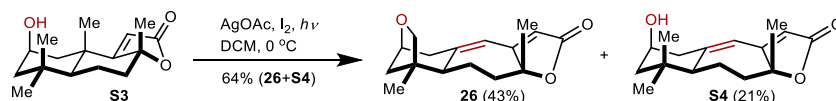

Compound **S3** (10 mg, 0.038 mmol, 1.0 equiv.), AgOAc (31.6 mg, 0.19 mmol, 5 equiv.) and I<sub>2</sub> (48.0 mg, 0.19 mmol, 5 equiv.) was dissolved in DCM (1 mL). The solution was irradiated with a flood lamp (200 W) at 0 °C for 1 h. The reaction was quenched by sat. aq. Na<sub>2</sub>S<sub>2</sub>O<sub>3</sub> (2 mL) and extracted with DCM (2 mL  $\times$  3). The combined organic extracts were washed with brine, dried over anhydrous Na<sub>2</sub>SO<sub>4</sub>, filtered, and concentrated *in vacuo*. The crude material was purified by flash column chromatography (3: 1 to 3: 2 petroleum: EtOAc) to yield **26** (4.3 mg, 43% yield) and **S4** (2.1 mg, 21% yield) as white powder.

(Compound **26**) **<sup>1</sup>H NMR (500 MHz, CDCl<sub>3</sub>):**  $\delta$  6.22 – 6.19 (m, 1H), 5.57 (s, 1H), 4.36 – 4.32 (m, 1H), 3.90 (d,  $J$  = 8.4 Hz, 1H), 3.35 (dd,  $J$  = 8.4, 1.5 Hz, 1H), 2.74 (d,  $J$  = 17.7 Hz, 1H), 2.59 – 2.50 (m, 1H), 2.39 – 2.32 (m, 2H), 2.05 – 1.97 (m, 1H), 1.93 (ddd,  $J$  = 11.6, 6.3, 2.5 Hz, 1H), 1.81 (ddd,  $J$  = 13.3, 13.3, 1.8 Hz, 1H), 1.72 – 1.65 (m, 2H), 1.52 (s, 3H), 1.17 (s, 3H).

**<sup>13</sup>C NMR (126 MHz, CDCl<sub>3</sub>):** δ 172.6, 171.6, 149.5, 119.9, 113.8, 87.1, 74.5, 74.1, 52.0, 45.0, 44.5, 43.6, 38.3, 26.0, 25.3, 22.3.

**HRMS (*m/z*):** [M+ H]<sup>+</sup> calcd for C<sub>16</sub>H<sub>20</sub>O<sub>3</sub>H<sup>+</sup> 261.1485, found 261.1489.

**[α]<sub>D</sub><sup>20</sup>** = +267.5 (*c* = 0.2, MeOH)

**[m.p.]** = 94–97 °C

(Compound **S4**)**<sup>1</sup>H NMR (500 MHz, CDCl<sub>3</sub>):** δ 6.25 (s, 1H), 5.60 (s, 1H), 4.21 – 4.16 (m, 1H), 2.65 – 2.54 (m, 2H), 2.29 (ddd, *J* = 13.2, 6.1, 1.8 Hz, 1H), 2.15 (dd, *J* = 9.3, 5.3 Hz, 1H), 2.03 – 1.96 (m, 1H), 1.81 (ddd, *J* = 13.3, 13.3, 1.9 Hz, 1H), 1.75 – 1.65 (m, 3H), 1.51 (s, 3H), 1.13 (s, 3H), 0.99 (s, 3H).

**<sup>13</sup>C NMR (126 MHz, CDCl<sub>3</sub>):** δ 172.7, 171.5, 150.2, 118.3, 113.8, 87.9, 67.5, 51.3, 47.5, 46.0, 36.8, 36.3, 30.8, 25.3, 24.3, 23.8.

**HRMS (*m/z*):** [M+ H]<sup>+</sup> calcd for C<sub>16</sub>H<sub>22</sub>O<sub>3</sub>H<sup>+</sup> 263.1642, found 263.1645.

**[α]<sub>D</sub><sup>20</sup>** = +254.0 (*c* = 0.5, MeOH)

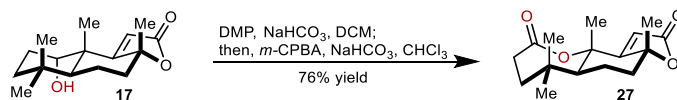

To a stirred solution of compound **17** (26.4 mg, 0.1 mmol, 1.0 equiv.) and NaHCO<sub>3</sub> (16.8 mg, 0.2 mmol, 2.0 equiv.) in DCM (2 mL) was added DMP (63.6 mg, 0.15 mmol, 1.5 equiv.) at 0 °C. After stirring at room temperature for 2 h, the reaction was quenched by sat. aq. NaHCO<sub>3</sub> (2 mL) and Na<sub>2</sub>S<sub>2</sub>O<sub>3</sub> (2 mL). Then, the mixture was extracted with DCM (2 mL × 3). The combined organic extracts were washed with brine, dried over anhydrous Na<sub>2</sub>SO<sub>4</sub>, filtered, and concentrated *in vacuo*. The crude material was re-dissolved in CHCl<sub>3</sub> (2 mL), NaHCO<sub>3</sub> (16.8 mg, 0.20 mmol, 2.0 equiv.) was added followed by *m*-CPBA (36.5 mg, 0.18 mmol, 1.8 equiv., 85%) at room temperature. After stirring at same temperature for 12 h, the reaction mixture was filtered through a Celite pad and washed with DCM (2 mL × 2). The resulting filtrate was washed sat. aq. Na<sub>2</sub>S<sub>2</sub>O<sub>3</sub> (2 mL), sat. aq. NaHCO<sub>3</sub> (2 mL) and brine, dried over anhydrous



Na<sub>2</sub>SO<sub>4</sub>, filtered, and concentrated *in vacuo*. The crude material was purified by flash column chromatography (7: 3 petroleum: EtOAc) to yield **27** (21.3 mg, 76% yield) as white powder.

**<sup>1</sup>H NMR (500 MHz, CDCl<sub>3</sub>):** δ 6.18 (s, 1H), 2.84 – 2.75 (m, 1H), 2.70 (dd, *J* = 17.5, 9.4 Hz, 1H), 2.27 (dd, *J* = 9.2, 3.0 Hz, 1H), 2.07 – 2.01 (m, 1H), 1.86 (dd, *J* = 13.9, 10.4 Hz, 1H), 1.73 (s, 3H), 1.65 – 1.58 (m, 2H), 1.56 – 1.47 (m, 5H), 1.10 (s, 3H), 1.05 (s, 3H).

**<sup>13</sup>C NMR (126 MHz, CDCl<sub>3</sub>):** δ 177.5, 173.0, 170.8, 114.4, 86.1, 85.3, 54.7, 39.2, 36.5, 36.3, 32.1, 31.8, 23.8, 22.9, 22.6, 21.7.

**HRMS (*m/z*):** [M+ H]<sup>+</sup> calcd for C<sub>16</sub>H<sub>22</sub>O<sub>4</sub>H<sup>+</sup> 279.1591, found 279.1590.

**[α]<sub>D</sub><sup>20</sup>** = −122.2 (*c* = 0.5, MeOH)

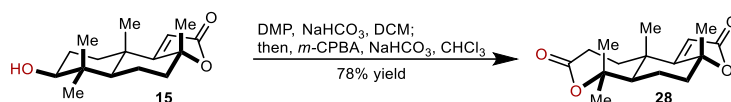

To a stirred solution of compound **15** (26.4 mg, 0.1 mmol, 1.0 equiv.) and NaHCO<sub>3</sub> (16.8 mg, 0.2 mmol, 2.0 equiv.) in DCM (2 mL) was added DMP (63.6 mg, 0.15 mmol, 1.5 equiv.) at 0 °C. After stirring at room temperature for 2 h, the reaction was quenched by sat. aq. NaHCO<sub>3</sub> (2 mL) and Na<sub>2</sub>S<sub>2</sub>O<sub>3</sub> (2 mL). Then, the mixture was extracted with DCM (2 mL × 3). The combined organic extracts were washed with brine, dried over anhydrous Na<sub>2</sub>SO<sub>4</sub>, filtered, and concentrated *in vacuo*. The crude material was re-dissolved in CHCl<sub>3</sub> (2 mL), NaHCO<sub>3</sub> (16.8 mg, 0.20 mmol, 2.0 equiv.) was added followed by *m*-CPBA (36.5 mg, 0.18 mmol, 1.8 equiv., 85%) at room temperature. After stirring at same temperature for 12 h, the reaction mixture was filtered through a Celite pad and washed with DCM (2 mL × 2). The resulting filtrate was washed sat. aq. Na<sub>2</sub>S<sub>2</sub>O<sub>3</sub> (2 mL), sat. aq. NaHCO<sub>3</sub> (2 mL) and brine, dried over anhydrous Na<sub>2</sub>SO<sub>4</sub>, filtered, and concentrated *in vacuo*. The crude material was purified by flash column chromatography (3: 2 petroleum: EtOAc) to yield **28** (21.8 mg, 78% yield) as white powder.

**<sup>1</sup>H NMR (500 MHz, CDCl<sub>3</sub>):** δ 5.62 (s, 1H), 2.90 – 2.82 (m, 1H), 2.78 (ddd, *J* = 16.4, 7.6, 2.8 Hz, 1H), 2.34 – 2.29 (m, 1H), 2.10 – 2.03 (m, 1H), 1.97 (ddd, *J* = 14.3, 7.6, 2.7 Hz, 1H), 1.93 – 1.89 (m, 1H), 1.72 – 1.62 (m, 2H), 1.59 (s, 3H), 1.58 – 1.52 (m, 1H), 1.50 (s, 3H), 1.47 (s, 3H), 1.37 (s, 3H).

**<sup>13</sup>C NMR (126 MHz, CDCl<sub>3</sub>):** δ 181.5, 173.8, 171.2, 112.0, 86.6, 85.4, 55.8, 42.0, 39.7, 34.3, 33.8, 31.5, 25.2, 24.7, 23.3, 18.4.

**HRMS (*m/z*):** [M+ H]<sup>+</sup> calcd for C<sub>16</sub>H<sub>22</sub>O<sub>4</sub>H<sup>+</sup> 279.1591, found 279.1589.

[α]<sub>D</sub><sup>20</sup> = −191.7 (*c* = 0.5, MeOH)

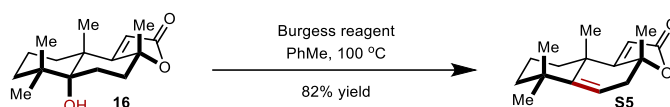

To a solution of compound **16** (1.70 g, 6.43 mmol, 1.0 equiv.) in toluene (50 mL) was added Burgess reagent (3.05 g, 12.8 mmol, 2.0 equiv.) at room temperature. After stirring at 100 °C for 4 h, the reaction was cooled down to room temperature and concentrated *in vacuo*. The crude material was purified by flash column chromatography (8: 1 petroleum: EtOAc) to yield **S5** (1.30 g, 82% yield) as white powder.

**<sup>1</sup>H NMR (500 MHz, CDCl<sub>3</sub>):** δ 5.58 (s, 1H), 5.48 (dd, *J* = 5.5, 2.2 Hz, 1H), 2.65 (dd, *J* = 16.9, 5.5 Hz, 1H), 2.34 (d, *J* = 16.9 Hz, 1H), 1.98 – 1.86 (m, 2H), 1.67 – 1.61 (m, 1H), 1.59 (s, 3H), 1.56 – 1.50 (m, 1H), 1.50 – 1.45 (m, 4H), 1.24 (ddd, *J* = 13.4, 13.4, 4.0 Hz, 1H), 1.19 (s, 3H), 1.11 (s, 3H).

**<sup>13</sup>C NMR (126 MHz, CDCl<sub>3</sub>):** δ 183.8, 172.9, 147.2, 116.3, 109.6, 84.6, 41.5, 40.9, 40.0, 38.6, 37.0, 32.9, 28.7, 25.8, 25.4, 18.2.

**HRMS (*m/z*):** [M+H]<sup>+</sup> calcd for C<sub>16</sub>H<sub>22</sub>O<sub>2</sub>H<sup>+</sup> 247.1693, found 247.1693.

[α]<sub>D</sub><sup>20</sup> = −215.0 (*c* = 0.5, MeOH)

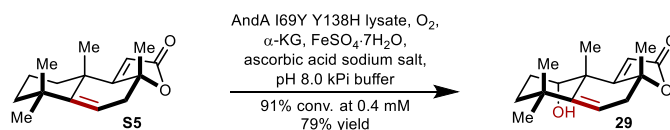

Two 2 L Erlenmeyer flasks were each charged with 475 mL of clarified lysate of *E. coli* expressing AndA-I69Y Y138H ( $OD_{600} = 30$ ). A pre-dissolved solution of **12** (50 mg, 0.2 mmol, 0.4 mM final concentration) in 25 mL DMSO was added to the lysate, followed by ascorbic acid sodium salt (213 mg, 1.08 mmol, 5.3 equiv.),  $\alpha$ -ketoglutaric acid (disodium salt dihydrate, 1.25 g, 6.6 mmol, 32.7 equiv.) and  $FeSO_4 \cdot 7H_2O$  (70 mg, 0.25 mmol, 1.2 equiv.). The flasks were shaken at 150 rpm at 30 °C under air for 20 h. Then, 25 g NaCl was added to flask and the mixture was extracted with EtOAc (400 mL  $\times$  3). The combined organic extracts were washed with sat. aq.  $NaHCO_3$  (400 mL), dried over anhydrous  $Na_2SO_4$ , and concentrated *in vacuo*. The crude material was purified by flash column chromatography (4: 1 to 2: 1 petroleum ether: EtOAc) to yield compound **29** (42.1 mg, 79% yield) as white powder.

**$^1H$  NMR (500 MHz,  $CDCl_3$ ):**  $\delta$  5.74 (dd,  $J = 6.0, 2.0$  Hz, 1H), 5.73 (s, 1H), 4.08 (dd,  $J = 2.6, 2.6$  Hz, 1H), 2.63 (dd,  $J = 16.7, 6.0$  Hz, 1H), 2.36 – 2.30 (m, 1H), 2.28 – 2.19 (m, 1H), 1.78 – 1.67 (m, 2H), 1.57 (s, 3H), 1.52 (s, 3H), 1.40 – 1.34 (m, 1H), 1.21 (s, 3H), 1.16 (s, 3H).

**$^{13}C$  NMR (126 MHz,  $CDCl_3$ ):**  $\delta$  179.0, 172.7, 143.7, 120.4, 110.9, 84.9, 72.7, 46.7, 39.3, 36.7, 34.5, 32.8, 29.2, 25.7, 25.4, 24.7.

**HRMS ( $m/z$ ):**  $[M+H]^+$  calcd for  $C_{16}H_{22}O_3H^+$  263.1642, found 263.1642.

$[\alpha]_D^{20} = -155.4$  ( $c = 0.5$ , MeOH)

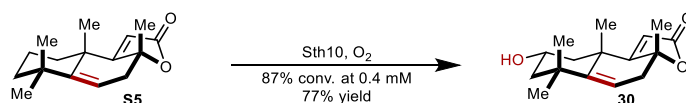

A 2 L Erlenmeyer flask was charged with 474 mL of whole cell transformation expressing Sth10. A pre-dissolved solution of **12** (50 mg, 0.2 mmol, 0.4 mM final concentration) in 25 mL DMSO was added to the inducible medium, followed by 5-ALA to final concentration of 1.0 mM. The flask was shaken at 220 rpm at 30 °C under air for 72 h. The mixture was extracted with EtOAc (400 mL  $\times$  3) and combined organic extracts were washed with sat. aq.  $NaHCO_3$  (400 mL), dried over anhydrous  $Na_2SO_4$ , and

concentrated *in vacuo*. The crude material was purified by flash column chromatography (4: 1 to 3: 2 petroleum ether: EtOAc) to yield compound **13** (41.0 mg, 77% yield) as a white solid.

**<sup>1</sup>H NMR (500 MHz, Methanol-*d*<sub>4</sub>):** δ 5.72 (s, 1H), 5.64 (dd, *J* = 5.4, 2.1 Hz, 1H), 4.27 – 4.18 (m, 1H), 2.73 (dd, *J* = 17.0, 5.5 Hz, 1H), 2.36 – 2.27 (m, 2H), 1.90 – 1.84 (m, 1H), 1.60 (s, 3H), 1.56 (s, 3H), 1.36 (dd, *J* = 11.7, 11.7 Hz, 1H), 1.27 (s, 3H), 1.21 – 1.13 (m, 4H).

**<sup>13</sup>C NMR (126 MHz, Methanol-*d*<sub>4</sub>):** δ 184.9, 174.7, 146.8, 118.5, 110.5, 86.3, 64.4, 51.1, 47.8, 42.1, 41.7, 38.6, 33.4, 29.8, 27.0, 25.7.

**HRMS (*m/z*):** [M+Na]<sup>+</sup> calcd for C<sub>16</sub>H<sub>22</sub>O<sub>3</sub>Na<sup>+</sup> 285.1461, found 285.1463.

[α]<sub>D</sub><sup>20</sup> = −196.4 (*c* = 0.5, MeOH)

[*m.p.*] = 197–198 °C

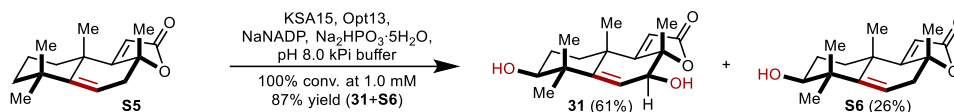

A 250 mL Erlenmeyer flask was charged with 47.5 mL of clarified lysate of *E. coli* co-expressing KSA15 and Opt13 (OD<sub>600</sub> = 30). A pre-dissolved solution of **S5** (12.5 mg, 0.05 mmol, 1 mM final concentration) in 2.5 mL DMSO was added to the lysate, followed by NaNADP (25 mg, 0.032 mmol, 0.63 equiv.) and Na<sub>2</sub>HPO<sub>3</sub>·5H<sub>2</sub>O (0.63 g, 2.89 mmol, 57.0 equiv.). The flask was shaken at 150 rpm at 23 °C under air for 20 h. Then, 5 g NaCl was added to flask and the mixture was extracted with EtOAc (50 mL × 3). The combined organic extracts were washed with sat. aq. NaHCO<sub>3</sub> (50 mL), dried over anhydrous Na<sub>2</sub>SO<sub>4</sub>, and concentrated *in vacuo*. The crude material was purified by flash column chromatography (4: 1 to 2: 3 petroleum ether: EtOAc) to yield compound **31** (8.7 mg, 61% yield) and **S6** (3.5 mg, 26% yield) as white powder.

(Compound **31**) **<sup>1</sup>H NMR (500 MHz, Methanol-*d*<sub>4</sub>):** δ 5.75 (s, 1H), 5.50 (d, *J* = 1.8 Hz, 1H), 4.10 (d, *J* = 1.8 Hz, 1H), 3.15 (dd, *J* = 11.7, 4.6 Hz, 1H), 2.04 (ddd, *J* = 13.2, 3.3, 3.3 Hz, 1H), 2.01 – 1.91 (m, 1H), 1.85 – 1.78 (m, 1H), 1.57 – 1.48 (m, 7H), 1.20 (s, 3H), 1.15 (s, 3H).

**<sup>13</sup>C NMR (126 MHz, Methanol-*d*<sub>4</sub>):** δ 183.7, 174.9, 148.3, 125.7, 112.1, 90.3, 78.1, 76.7, 43.7, 40.8, 36.7, 28.3, 27.6, 26.4, 22.4, 19.1.

**HRMS (*m/z*):** [M+Na]<sup>+</sup> calcd for C<sub>16</sub>H<sub>22</sub>O<sub>4</sub>Na<sup>+</sup> 301.1410, found 301.1413.

**[α]<sub>D</sub><sup>20</sup>** = −128.5 (*c* = 0.2, MeOH)

(Compound **S6**) **<sup>1</sup>H NMR (500 MHz, Methanol-*d*<sub>4</sub>):** δ 5.69 (s, 1H), 5.68 (dd, *J* = 5.6, 2.2 Hz, 1H), 3.15 (dd, *J* = 11.7, 4.6 Hz, 1H), 2.72 (dd, *J* = 16.9, 5.6 Hz, 1H), 2.30 – 2.24 (m, 1H), 2.04 (ddd, *J* = 13.0, 3.4, 3.4 Hz, 1H), 2.02 – 1.91 (m, 1H), 1.85 – 1.78 (m, 1H), 1.60 (s, 3H), 1.58 – 1.51 (m, 4H), 1.19 (s, 3H), 1.14 (s, 3H).

**<sup>13</sup>C NMR (126 MHz, Methanol-*d*<sub>4</sub>):** δ 185.8, 175.0, 147.5, 119.3, 110.5, 86.3, 78.1, 43.9, 41.5, 40.9, 36.9, 28.3, 27.6, 26.1, 25.3, 22.7.

**HRMS (*m/z*):** [M+ Na]<sup>+</sup> calcd for C<sub>16</sub>H<sub>22</sub>O<sub>3</sub>Na<sup>+</sup> 285.1461, found 285.1462.

**[α]<sub>D</sub><sup>20</sup>** = −145.5 (*c* = 0.2, MeOH)

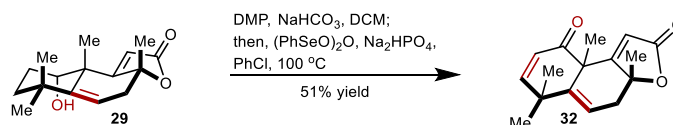

To a stirred solution of compound **29** (10.0 mg, 0.038 mmol, 1.0 equiv.) and NaHCO<sub>3</sub> (8 mg, 0.095 mmol, 2.5 equiv.) in DCM (1 mL) was added DMP (32.3 mg, 0.076 mmol, 2 equiv.) at 0 °C. After stirring at room temperature for 2 h, the reaction was quenched by sat. aq. NaHCO<sub>3</sub> (1 mL) and Na<sub>2</sub>S<sub>2</sub>O<sub>3</sub> (1 mL). Then, the mixture was extracted with DCM (2 mL × 3). The combined organic extracts were washed with brine, dried over anhydrous Na<sub>2</sub>SO<sub>4</sub>, filtered, and concentrated *in vacuo*. The crude material re-dissolved in PhCl (1 mL), Na<sub>2</sub>HPO<sub>4</sub> (21.6 mg, 0.15 mmol, 4 equiv.) was added followed by (PhSeO)<sub>2</sub>O<sup>1</sup> (54.9 mg, 0.15 mmol, 4 equiv.). After stirring at 100 °C for 4 h, the reaction mixture was concentrated *in vacuo*. The crude material was purified by flash column chromatography (7: 3 petroleum: EtOAc) to yield **32** (5.1 mg, 51% yield) as pale yellow powder.

**<sup>1</sup>H NMR (500 MHz, CDCl<sub>3</sub>):** δ 6.76 (s, 1H), 6.59 (d, *J* = 10.2 Hz, 1H), 5.90 (d, *J* = 10.1 Hz, 1H), 5.84 (dd, *J* = 6.1, 2.2 Hz, 1H), 2.69 (dd, *J* = 17.0, 6.1 Hz, 1H), 2.38 (d, *J* = 16.9 Hz, 1H), 1.73 (s, 3H), 1.61 (s, 3H), 1.45 (s, 3H), 1.36 (s, 3H).

**<sup>13</sup>C NMR (126 MHz, CDCl<sub>3</sub>):** δ 197.4, 172.7, 171.0, 156.2, 141.7, 123.8, 121.8, 115.2, 84.8, 50.7, 39.2, 39.0, 30.8, 29.8, 29.0, 25.6.

**HRMS (*m/z*):** [M+H]<sup>+</sup> calcd for C<sub>16</sub>H<sub>18</sub>O<sub>3</sub>H<sup>+</sup> 259.1329, found 259.1329.

**[α]<sub>D</sub><sup>20</sup>** = −156.9 (*c* = 0.2, MeOH)

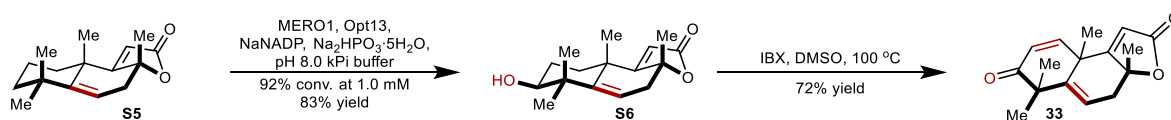

A 250 mL Erlenmeyer flask was charged with 47.5 mL of clarified lysate of *E. coli* co-expressing Mero1 and Opt13 (OD<sub>600</sub> = 30). A pre-dissolved solution of **S5** (12.5 mg, 0.05 mmol, 1 mM final concentration) in 2.5 mL DMSO was added to the lysate, followed by NaNADP (25 mg, 0.032 mmol, 0.63 equiv.) and Na<sub>2</sub>HPO<sub>3</sub>·5H<sub>2</sub>O (0.63 g, 2.89 mmol, 57.0 equiv.). The flask was shaken at 150 rpm at 23 °C under air for 20 h. Then, 5 g NaCl was added to flask and the mixture was extracted with EtOAc (50 mL × 3). The combined organic extracts were washed with sat. aq. NaHCO<sub>3</sub> (50 mL), dried over anhydrous Na<sub>2</sub>SO<sub>4</sub>, and concentrated *in vacuo*. The crude material was purified by flash column chromatography (4: 1 to 3: 2 petroleum ether: EtOAc) to yield compound **S6** (11.1 mg, 83% yield) as white powder.

Compound **S6** (11.1 mg, 0.042 mmol, 1.0 equiv.) and IBX (71.1 mg, 0.25 mmol, 6 equiv.) was dissolved in DMSO (1 mL) at room temperature. After stirring at 100 °C for 72 h, the reaction was quenched by sat. aq. NaHCO<sub>3</sub> (1 mL) and extracted with EtOAc (2 mL × 3). The combined organic extracts were washed with brine, dried over anhydrous Na<sub>2</sub>SO<sub>4</sub>, filtered, and concentrated *in vacuo*. The crude material was purified by flash column chromatography (7: 3 petroleum: EtOAc) to yield **33** (7.9 mg, 72% yield) as a white solid.

**<sup>1</sup>H NMR (500 MHz, CDCl<sub>3</sub>):** δ 7.08 (d, *J* = 10.1 Hz, 1H), 6.04 (d, *J* = 10.1 Hz, 1H), 5.79 (s, 1H), 5.74 – 5.69 (m, 1H), 2.80 (dd, *J* = 17.6, 5.1 Hz, 1H), 2.43 (d, *J* = 17.6 Hz, 1H), 1.71 (s, 3H), 1.69 (s, 3H), 1.43 (s, 3H), 1.35 (s, 3H).

**<sup>13</sup>C NMR (126 MHz, CDCl<sub>3</sub>):** δ 201.4, 175.9, 171.3, 149.4, 141.6, 126.3, 120.1, 111.2, 84.2, 48.8, 41.2, 40.6, 29.4, 28.4, 26.0, 25.3.

**HRMS (*m/z*):** [M+ Na]<sup>+</sup> calcd for C<sub>16</sub>H<sub>18</sub>O<sub>3</sub>Na<sup>+</sup> 281.1148, found 281.1151.

[α]<sub>D</sub><sup>20</sup> = −81.0 (*c* = 0.5, MeOH)

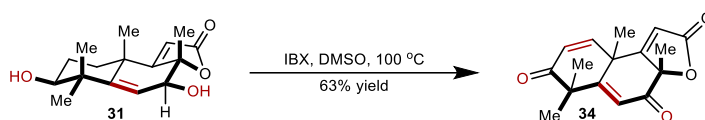

Compound **31** (10.0 mg, 0.036 mmol, 1.0 equiv.) and IBX (60.4 mg, 0.22 mmol, 6 equiv.) was dissolved in DMSO (1 mL) at room temperature. After stirring at 100 °C for 96 h, the reaction was quenched by sat. aq. NaHCO<sub>3</sub> (1 mL) and extracted with EtOAc (2 mL × 3). The combined organic extracts were washed with brine, dried over anhydrous Na<sub>2</sub>SO<sub>4</sub>, filtered, and concentrated *in vacuo*. The crude material was purified by flash column chromatography (3: 2 petroleum: EtOAc) to yield **34** (6.2 mg, 63% yield) as pale yellow powder.

**<sup>1</sup>H NMR (500 MHz, CDCl<sub>3</sub>):** δ 7.10 (d, *J* = 10.1 Hz, 1H), 6.23 – 6.18 (m, 2H), 5.86 (s, 1H), 1.91 (s, 3H), 1.84 (s, 3H), 1.55 (s, 3H), 1.44 (s, 3H).

**<sup>13</sup>C NMR (126 MHz, CDCl<sub>3</sub>):** δ 198.2, 191.2, 171.2, 169.4, 167.2, 146.9, 126.8, 124.6, 113.7, 87.6, 50.3, 42.3, 29.5, 27.9, 24.8, 24.7.

**HRMS (*m/z*):** [M+ Na]<sup>+</sup> calcd for C<sub>16</sub>H<sub>16</sub>O<sub>4</sub>Na<sup>+</sup> 295.0941, found 295.0943.

[α]<sub>D</sub><sup>20</sup> = −49.6 (*c* = 0.5, MeOH)

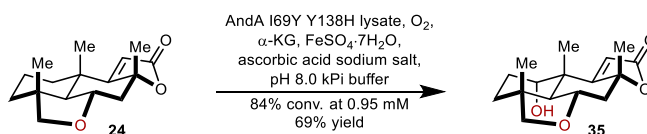

Twelve 2 L Erlenmeyer flasks were each charged with 475 mL of clarified lysate of *E. coli* expressing AndA-I69Y Y138H (OD<sub>600</sub> = 30). A pre-dissolved solution of **24** (125 mg, 0.48 mmol, 0.95 mM final concentration) in 25 mL DMSO was added to the lysate, followed by ascorbic acid sodium salt (213 mg, 1.08 mmol, 2.3 equiv.),  $\alpha$ -ketoglutaric acid (disodium salt dihydrate, 1.25 g, 6.65 mmol, 13.9 equiv.) and FeSO<sub>4</sub>·7H<sub>2</sub>O (70 mg, 0.25 mmol, 0.53 equiv.). The flasks were shaken at 150 rpm at 30 °C under air for 20 h. Then, 25 g NaCl was added to flask and the mixture was extracted with EtOAc (400 mL  $\times$  3). The combined organic extracts were washed with sat. aq. NaHCO<sub>3</sub> (400 mL), dried over anhydrous Na<sub>2</sub>SO<sub>4</sub>, and concentrated *in vacuo*. The crude material was purified by flash column chromatography (3: 2 to 1: 2 petroleum ether: EtOAc) to yield compound **35** (1.10 g, 69% yield) as a white solid.

**<sup>1</sup>H NMR (500 MHz, Acetone-*d*<sub>6</sub>):**  $\delta$  5.83 (s, 1H), 4.13 – 4.03 (m, 2H), 3.61 (d, *J* = 7.3 Hz, 1H), 3.48 (d, *J* = 7.3 Hz, 1H), 2.55 (dd, *J* = 11.0, 4.3 Hz, 1H), 2.23 – 2.15 (m, 1H), 1.89 (d, *J* = 11.9 Hz, 1H), 1.79 – 1.66 (m, 2H), 1.55 (s, 3H), 1.51 – 1.42 (m, 2H), 1.29 (s, 3H), 1.18 (s, 3H).

**<sup>13</sup>C NMR (126 MHz, Acetone-*d*<sub>6</sub>):**  $\delta$  177.5, 172.1, 114.4, 88.2, 84.5, 72.0, 70.7, 52.9, 45.6, 42.9, 40.7, 30.3, 28.0, 27.8, 19.2, 19.2.

**HRMS (*m/z*):** [M+H]<sup>+</sup> calcd for C<sub>16</sub>H<sub>22</sub>O<sub>4</sub>H<sup>+</sup> 279.1591, found 279.1590.

**[ $\alpha$ ]<sub>D</sub><sup>20</sup>** = –8.1 (*c* = 0.5, MeOH)

**[m.p.]** = 243–244 °C

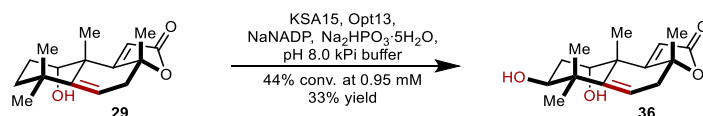

A 2L Erlenmeyer flask was charged with 475 mL of clarified lysate of *E. coli* co-expressing KSA15 and Opt13 (OD<sub>600</sub> = 30). A pre-dissolved solution of **29** (125 mg, 0.48 mmol, 0.95 mM final concentration) in 25 mL DMSO was added to the lysate, followed by NaNADP (250 mg, 0.32 mmol, 0.67 equiv.) and Na<sub>2</sub>HPO<sub>3</sub>·5H<sub>2</sub>O (625 mg, 28.9 mmol, 60.7 equiv.). The flask was shaken at 150 rpm at 23 °C under air for 20 h. Then, 5 g NaCl was added to flask and the mixture was extracted with EtOAc (50 mL  $\times$  5). The



combined organic extracts were washed with sat. aq. NaHCO<sub>3</sub> (50 mL), dried over anhydrous Na<sub>2</sub>SO<sub>4</sub>, and concentrated *in vacuo*. The crude material was purified by flash column chromatography (2: 1 to 1: 2 petroleum ether: EtOAc) to yield compound **36** (43.8 mg, 33% yield) as a white solid.

**<sup>1</sup>H NMR (500 MHz, Methanol-*d*<sub>4</sub>):** δ 5.84 (d, *J* = 5.4 Hz, 1H), 5.72 (s, 1H), 4.16 (s, 1H), 3.67 (dd, *J* = 12.1, 4.7 Hz, 1H), 2.63 (dd, *J* = 16.5, 6.1 Hz, 1H), 2.31 (d, *J* = 16.4 Hz, 1H), 2.21 (dd, *J* = 13.0, 13.0 Hz, 1H), 1.94 (ddd, *J* = 14.0, 4.2, 4.2 Hz, 1H), 1.58 (s, 3H), 1.52 (s, 3H), 1.22 (s, 3H), 1.14 (s, 3H).

**<sup>13</sup>C NMR (126 MHz, Methanol-*d*<sub>4</sub>):** δ 181.2, 175.3, 144.4, 122.3, 111.9, 86.8, 73.2, 73.0, 47.1, 43.7, 39.8, 34.8, 28.4, 26.4, 25.7, 23.3.

**HRMS (*m/z*):** [M+H]<sup>+</sup> calcd for C<sub>16</sub>H<sub>22</sub>O<sub>4</sub>H<sup>+</sup> 279.1591, found 279.1593.

**[α]<sub>D</sub><sup>20</sup>** = −122.7 (*c* = 0.5, MeOH)

**[m.p.]** = 226–228 °C

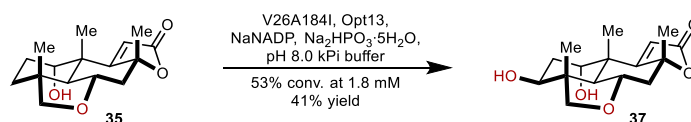

A 250 mL Erlenmeyer flask was charged with 47.5 mL of clarified lysate of *E. coli* co-expressing V26A184I and Opt13 (OD<sub>600</sub> = 30). A pre-dissolved solution of **35** (25 mg, 0.090 mmol, 1.8 mM final concentration) in 2.5 mL MeOH was added to the lysate, followed by NaNADP (25 mg, 0.032 mmol, 0.35 equiv.) and Na<sub>2</sub>HPO<sub>3</sub>·5H<sub>2</sub>O (0.63 g, 2.89 mmol, 32.2 equiv.). The flask was shaken at 150 rpm at 23 °C under air for 20 h. Then, 5 g NaCl was added to flask and the mixture was extracted with EtOAc (50 mL × 5). The combined organic extracts were washed with sat. aq. NaHCO<sub>3</sub> (50 mL), dried over anhydrous Na<sub>2</sub>SO<sub>4</sub>, and concentrated *in vacuo*. The crude material was purified by PTLC (10: 1 DCM:MeOH) to yield compound **37** (10.9 mg, 41% yield) as white powder.

**<sup>1</sup>H NMR (500 MHz, Methanol-*d*<sub>4</sub>: CDCl<sub>3</sub> = 3: 2):** δ 5.86 (s, 1H), 4.15 (ddd, *J* = 11.2, 11.2, 4.3 Hz, 1H), 4.07 (dd, *J* = 2.7, 2.7 Hz, 1H), 3.88 (dd, *J* = 11.5, 4.3 Hz, 1H), 3.82 (d, *J* = 7.7 Hz, 1H), 3.69 (d, *J* = 7.7

Hz, 1H), 2.62 (dd,  $J = 11.1, 4.2$  Hz, 1H), 2.09 – 2.02 (m, 1H), 1.88 (ddd,  $J = 14.3, 3.8, 3.8$  Hz, 1H), 1.79 (d,  $J = 11.8$  Hz, 1H), 1.61 – 1.54 (m, 4H), 1.25 (s, 3H), 1.16 (s, 3H).

**$^{13}\text{C}$  NMR (126 MHz, Methanol- $d_4$ :  $\text{CDCl}_3 = 3: 2$ ):**  $\delta$  177.9, 174.2, 114.6, 89.6, 84.6, 72.9, 72.4, 72.3, 51.8, 46.3, 44.6, 42.4, 36.6, 27.8, 19.3, 14.1.

**HRMS ( $m/z$ ):**  $[\text{M}+\text{H}]^+$  calcd for  $\text{C}_{16}\text{H}_{22}\text{O}_5\text{H}^+$  295.1540, found 295.1540.

$[\alpha]_{\text{D}}^{20} = -15.1$  ( $c = 0.5$ , MeOH:  $\text{CHCl}_3 = 1:1$ )

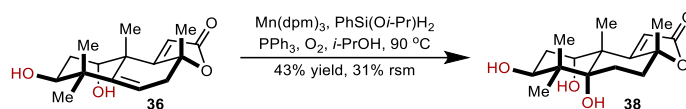

To a stirred solution of compound **36** (10.0 mg, 0.036 mmol, 1.0 equiv.),  $\text{Mn}(\text{dpm})_3$  (26.1 mg, 0.043 mmol, 1.2 equiv.) and  $\text{PPh}_3$  (14.1 mg, 0.054 mmol, 1.5 equiv.) in *i*-PrOH (1 mL),  $\text{PhSi}(\text{O}i\text{-Pr})\text{H}_3$  (32  $\mu\text{L}$ , 0.18 mmol, 5 equiv.) was added slowly at room temperature under  $\text{O}_2$  atmosphere. After stirring at 90  $^\circ\text{C}$  for 24 h, the mixture was concentrated *in vacuo*. The crude material was purified by PTLC (EtOAc) to yield **38** (4.6 mg, 43% yield) and **36** (3.1 mg, 31% yield) as white powder.

**$^1\text{H}$  NMR (500 MHz, Methanol- $d_4$ ):**  $\delta$  6.06 (s, 1H), 4.18 (dd,  $J = 2.8, 2.8$  Hz, 1H), 4.06 (dd,  $J = 12.2, 4.9$  Hz, 1H), 2.20 (ddd,  $J = 14.5, 12.3, 2.5$  Hz, 1H), 2.13 – 2.06 (m, 1H), 1.99 (ddd,  $J = 14.3, 9.8, 5.1$  Hz, 3H), 1.86 – 1.80 (m, 1H), 1.61 (s, 3H), 1.35 (s, 3H), 1.09 (s, 3H), 0.99 (s, 3H).

**$^{13}\text{C}$  NMR (126 MHz, Methanol- $d_4$ ):**  $\delta$  180.9, 175.3, 114.9, 89.1, 83.2, 74.9, 70.1, 47.7, 45.6, 35.6, 34.7, 27.5, 26.1, 23.2, 23.1, 18.1.

**HRMS ( $m/z$ ):**  $[\text{M}+\text{H}]^+$  calcd for  $\text{C}_{16}\text{H}_{24}\text{O}_5\text{H}^+$  297.1697, found 297.1695.

$[\alpha]_{\text{D}}^{20} = -78.4$  ( $c = 0.2$ , MeOH)

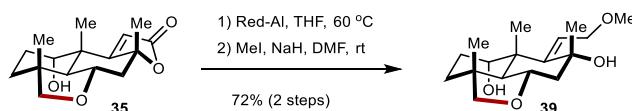



To a stirred solution of compound **39** (290 mg, 0.98 mmol, 1.0 equiv.) in degassed DCM (15 mL) was added Crabtree's catalyst (40 mg, 0.05 mmol, 0.05 equiv.). The reaction mixture was allowed to stir under H<sub>2</sub> (balloon pressure) at room temperature for 12 h. Then, Dess-Martin periodinane (64 mg, 1.50 mmol, 1.5 equiv.) was added to the mixture. The reaction mixture was stirred for 1 h before it was quenched with saturated aq. Na<sub>2</sub>S<sub>2</sub>O<sub>3</sub> (10 mL) and NaHCO<sub>3</sub> (10 mL). Then, it was extracted with EtOAc (3 × 100 mL). The combined organic extract was washed with brine, dried over anhydrous Na<sub>2</sub>SO<sub>4</sub>, filtered, and concentrated *in vacuo*. The residue was purified by flash column chromatography (1:1 petroleum ether: EtOAc) to yield compound **40** (226 mg, 78% yield) as a white solid.

**<sup>1</sup>H NMR (500 MHz, Chloroform-*d*):** δ 3.87 (ddd, *J* = 11.2, 11.2, 4.3 Hz, 1H), 3.71 (d, *J* = 7.6 Hz, 1H), 3.66 (dd, *J* = 5.6, 3.3 Hz, 2H), 3.50 (d, *J* = 7.6 Hz, 1H), 3.38 (s, 3H), 2.93 (ddd, *J* = 14.2, 14.2, 6.1 Hz, 1H), 2.32 (dd, *J* = 11.6, 4.3 Hz, 1H), 2.17 (ddd, *J* = 15.0, 4.6, 2.1 Hz, 1H), 1.95 (ddd, *J* = 12.8, 6.2, 2.2 Hz, 1H), 1.90 – 1.82 (m, 2H), 1.78 – 1.71 (m, 2H), 1.53 (d, *J* = 11.4 Hz, 1H), 1.44 (dd, *J* = 11.4, 11.4 Hz, 1H), 1.38 (s, 3H), 1.18 (s, 3H), 1.18 (s, 3H).

**<sup>13</sup>C NMR (126 MHz, Chloroform-*d*):** δ 214.0, 82.8, 73.9, 73.0, 71.8, 62.8, 58.8, 53.0, 51.7, 48.4, 39.7, 37.4, 35.1, 27.6, 26.4, 19.7, 14.4.

**HRMS (*m/z*):** [M+Na]<sup>+</sup> calcd for C<sub>17</sub>H<sub>28</sub>O<sub>4</sub>Na<sup>+</sup> 319.1885, found 319.1877.

**[α]<sub>D</sub><sup>25</sup>** = +28.9 (*c* = 0.25, MeOH).

**[m.p.]** = 133–135 °C

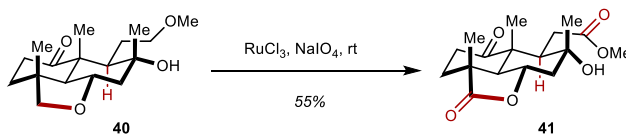

Ether **40** (200 mg, 0.68 mmol, 1.0 equiv.) was dissolved in CH<sub>3</sub>CN (10 mL) and CCl<sub>4</sub> (10 mL). Then, potassium phosphate buffer (1 M, pH = 7, 10 mL) was added followed by RuCl<sub>3</sub> (153 mg, 0.68 mmol, 1.0 equiv.) and NaIO<sub>4</sub> (292 mg, 1.36 mmol, 2.0 equiv.). The mixture was stirred vigorously at room temperature. After 4 h, another portion of NaIO<sub>4</sub> (0.5 equiv.) was added and the mixture was stirred for

12 h. This was repeated once, then another portion of NaIO<sub>4</sub> (0.5 equiv.) was added and stirred for another 12 h. The reaction was quenched with saturated aq. Na<sub>2</sub>S<sub>2</sub>O<sub>3</sub> (50 mL) and extracted with EtOAc (3 × 100 mL). The combined organic extract was washed with brine, dried over anhydrous Na<sub>2</sub>SO<sub>4</sub>, filtered, and concentrated *in vacuo*. The residue was purified by flash column chromatography (1:1 petroleum ether:EtOAc) to yield compound **41** (123 mg, 55% yield) as white powder.

**<sup>1</sup>H NMR (500 MHz, CDCl<sub>3</sub>):** δ 4.29 (ddd, *J* = 11.2, 11.2, 4.5 Hz, 1H), 3.67 (s, 3H), 2.84 – 2.75 (m, 1H), 2.74 (d, *J* = 13.1 Hz, 1H), 2.48 – 2.38 (m, 3H), 2.25 (ddd, *J* = 15.6, 4.8, 2.0 Hz, 1H), 1.90 (d, *J* = 11.4 Hz, 1H), 1.60 (dd, *J* = 11.3, 11.3 Hz, 1H), 1.41 (s, 3H), 1.16 (s, 3H), 1.15 (s, 3H).

**<sup>13</sup>C NMR (126 MHz, CDCl<sub>3</sub>):** δ 210.3, 178.7, 175.2, 73.4, 72.5, 59.5, 52.1, 49.2, 49.0, 46.9, 40.9, 34.2, 33.9, 31.2, 23.9, 15.6, 14.9.

**HRMS (*m/z*):** [M+Na]<sup>+</sup> calcd for C<sub>17</sub>H<sub>24</sub>O<sub>6</sub>Na<sup>+</sup> 347.1471, found 347.1463.

**[α]<sub>D</sub><sup>25</sup>** = −5.4 (*c* = 0.25, MeOH).

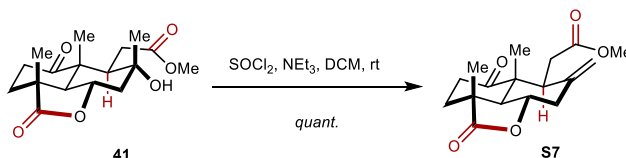

To a stirred solution of compound **41** (100 mg, 0.31 mmol, 1.0 equiv.) in DCM (10 mL) was added Et<sub>3</sub>N (0.26 mL, 1.86 mmol, 6.0 equiv.) followed by SOCl<sub>2</sub> (50 μL, 0.68 mmol, 2.0 equiv.). The reaction mixture was allowed to stir at −90 °C for 1 h. Then, the reaction mixture was quenched with saturated aq. NH<sub>4</sub>Cl (10 mL) and extracted with EtOAc (3 × 30 mL). The combined organic extract was washed with brine, dried over anhydrous Na<sub>2</sub>SO<sub>4</sub>, filtered, and concentrated *in vacuo*. The residue was purified by flash column chromatography (2:1 petroleum ether: EtOAc) to yield compound **S7** (90 mg, 95% yield) as white powder.

**<sup>1</sup>H NMR (500 MHz, CDCl<sub>3</sub>):** δ 5.15 (s, 1H), 4.89 (s, 1H), 4.29 (ddd, *J* = 11.0, 11.0, 5.1 Hz, 1H), 3.67 (s, 3H), 3.33 (dd, *J* = 16.3, 2.8 Hz, 1H), 3.02 – 2.91 (m, 2H), 2.79 (ddd, *J* = 15.6, 13.3, 6.5 Hz, 1H), 2.46 (dd,

$J = 16.3, 11.4$  Hz, 1H), 2.40 (ddd,  $J = 15.6, 4.7, 2.1$  Hz, 1H), 2.28 (dd,  $J = 11.2, 11.2$  Hz, 1H), 2.15 – 2.11 (m, 1H), 2.13 – 2.10 (m, 1H), 2.09 – 2.02 (m, 1H), 1.47 (s, 3H), 1.09 (s, 3H).

**$^{13}\text{C}$  NMR (126 MHz,  $\text{CDCl}_3$ ):**  $\delta$  211.6, 178.7, 172.8, 141.8, 115.8, 74.0, 59.8, 51.9, 50.0, 45.4, 42.5, 41.3, 35.9, 33.8, 32.2, 15.7, 13.4.

**HRMS ( $m/z$ ):**  $[\text{M}+\text{Na}]^+$  calcd for  $\text{C}_{17}\text{H}_{22}\text{O}_5\text{Na}^+$  329.1365, found 347.1358.

$[\alpha]_D^{25} = +33.7$  ( $c = 0.25$ , MeOH).

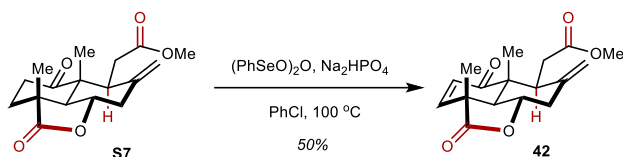

To a stirred solution of compound **S7** (20.0 mg, 0.07 mmol, 1.0 equiv.) in PhCl (10 mL) was added  $\text{Na}_2\text{HPO}_4$  (49.3 mg, 0.35 mol, 5.0 equiv.) and benzeneseleninic acid anhydride<sup>1</sup> (75.6 mg, 0.21 mol, 3.0 equiv.). The reaction mixture was stirred at 100 °C for 4 h after which time TLC analysis indicated that all starting material was consumed. The reaction was cooled to room temperature before it was purified by flash column chromatography (3:1 petroleum ether: EtOAc) to yield compound **42** (10.0 mg, 50% yield) as white powder.

**$^1\text{H}$  NMR (500 MHz,  $\text{CDCl}_3$ ):**  $\delta$  7.27 (d,  $J = 9.7$  Hz, 1H), 5.97 (d,  $J = 9.7$  Hz, 1H), 5.20 (dd  $J = 1.5, 1.5$  Hz, 1H), 4.96 (dd,  $J = 1.4, 1.4$  Hz, 1H), 4.36 (ddd,  $J = 11.7, 10.3, 5.3$  Hz, 1H), 3.67 (s, 3H), 3.62 (dd,  $J = 16.6, 3.0$  Hz, 1H), 3.05 (dd,  $J = 11.9, 5.3$  Hz, 1H), 2.67 (d,  $J = 11.7$  Hz, 1H), 2.60 (dd,  $J = 16.6, 11.4$  Hz, 1H), 2.39 (dd,  $J = 11.1, 11.1$  Hz, 1H), 1.43 (s, 3H), 1.04 (s, 3H).

**$^{13}\text{C}$  NMR (126 MHz,  $\text{CDCl}_3$ ):**  $\delta$  201.8, 175.9, 172.9, 149.8, 141.5, 131.7, 116.6, 74.6, 57.2, 52.0, 46.4, 46.2, 44.2, 42.8, 31.8, 18.5, 13.8.

**HRMS ( $m/z$ ):**  $[\text{M}+\text{H}]^+$  calcd for  $\text{C}_{17}\text{H}_{20}\text{O}_5\text{H}^+$  305.1389, found 305.1385.

$[\alpha]_D^{25} = +81.1$  ( $c = 0.25$ , MeOH).

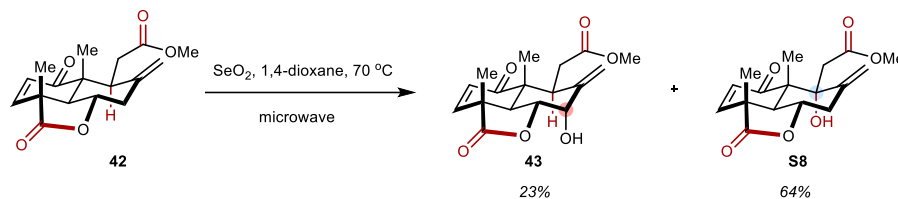

To a stirred solution of compound **42** (10.0 mg, 0.03 mmol, 1.0 equiv.) in 1,4-dioxane (2.0 mL) was added  $\text{SeO}_2$  (10.0 mg, 0.09 mol, 3.0 equiv.). The reaction mixture was stirred at 70 °C for 2 h under microwave condition before it was concentrated *in vacuo*. The residue was purified by flash column chromatography (1:1 petroleum ether: EtOAc) to yield compound **43** (2.40 mg, 23% yield) and compound **S8** (6.70 mg, 64% yield) as white powder.

(Compound **43**)  $^1\text{H}$  NMR (600 MHz,  $\text{CDCl}_3$ ):  $\delta$  7.24 (d,  $J = 9.7$  Hz, 1H), 5.97 (d,  $J = 9.7$  Hz, 1H), 5.21 (s, 1H), 5.18 (s, 1H), 4.92 (s, 1H), 4.38 – 4.31 (m, 1H), 3.87 (d,  $J = 17.1$  Hz, 1H), 3.75 (s, 1H), 3.74 (s, 3H), 3.72 (s, 1H), 2.97 – 2.89 (m, 2H), 2.80 (dd,  $J = 11.5, 5.4$  Hz, 1H), 1.40 (s, 3H), 1.06 (s, 3H).

$^{13}\text{C}$  NMR (151 MHz,  $\text{CDCl}_3$ ):  $\delta$  201.1, 176.2, 174.9, 149.5, 144.7, 132.4, 116.6, 78.1, 74.7, 52.3, 50.9, 48.3, 43.7, 38.5, 35.2, 18.4, 15.0.

HRMS ( $m/z$ ):  $[\text{M}+\text{Na}]^+$  calcd for  $\text{C}_{17}\text{H}_{20}\text{O}_6\text{Na}^+$  343.1158, found 343.1151.

$[\alpha]_D^{25} = +26.2$  ( $c = 0.1$ ,  $\text{CHCl}_3$ ).

(Compound **S8**)  $^1\text{H}$  NMR (500 MHz,  $\text{CDCl}_3$ ):  $\delta$  7.28 (d,  $J = 9.7$  Hz, 1H), 5.98 (d,  $J = 9.7$  Hz, 1H), 5.40 (s, 1H), 5.08 (s, 1H), 4.76 (d,  $J = 3.4$  Hz, 1H), 4.38 (dd,  $J = 12.3, 3.5$  Hz, 1H), 3.61 (dd,  $J = 16.6, 3.2$  Hz, 1H), 3.43 (d,  $J = 11.5$  Hz, 1H), 3.40 (d,  $J = 12.3$  Hz, 1H), 2.59 (dd,  $J = 16.5, 11.7$  Hz, 1H), 1.44 (s, 3H), 1.03 (s, 3H).

$^{13}\text{C}$  NMR (126 MHz,  $\text{CDCl}_3$ ):  $\delta$  201.6, 175.5, 172.7, 149.6, 144.6, 131.9, 118.2, 76.3, 72.5, 52.0, 47.2, 46.1, 44.1, 40.8, 31.3, 18.4, 13.0.

HRMS ( $m/z$ ):  $[\text{M}+\text{Na}]^+$  calcd for  $\text{C}_{17}\text{H}_{20}\text{O}_6\text{Na}^+$  343.1158, found 343.1150.

$[\alpha]_D^{25} = +68.2$  ( $c = 0.25$ , MeOH).

## ***References***

1. Yang, F. & Porco, J. A., Jr. Unified, asymmetric Total Synthesis of the Asnovolins and Related Spiromeroterpenoids: A Fragment Coupling Approach. *J. Am. Chem. Soc.* **144**, 12970–12978 (2022).



# *NMR Spectra of Compounds*

## <sup>1</sup>H NMR Spectrum of compound 13 (500 MHz, CDCl<sub>3</sub>)

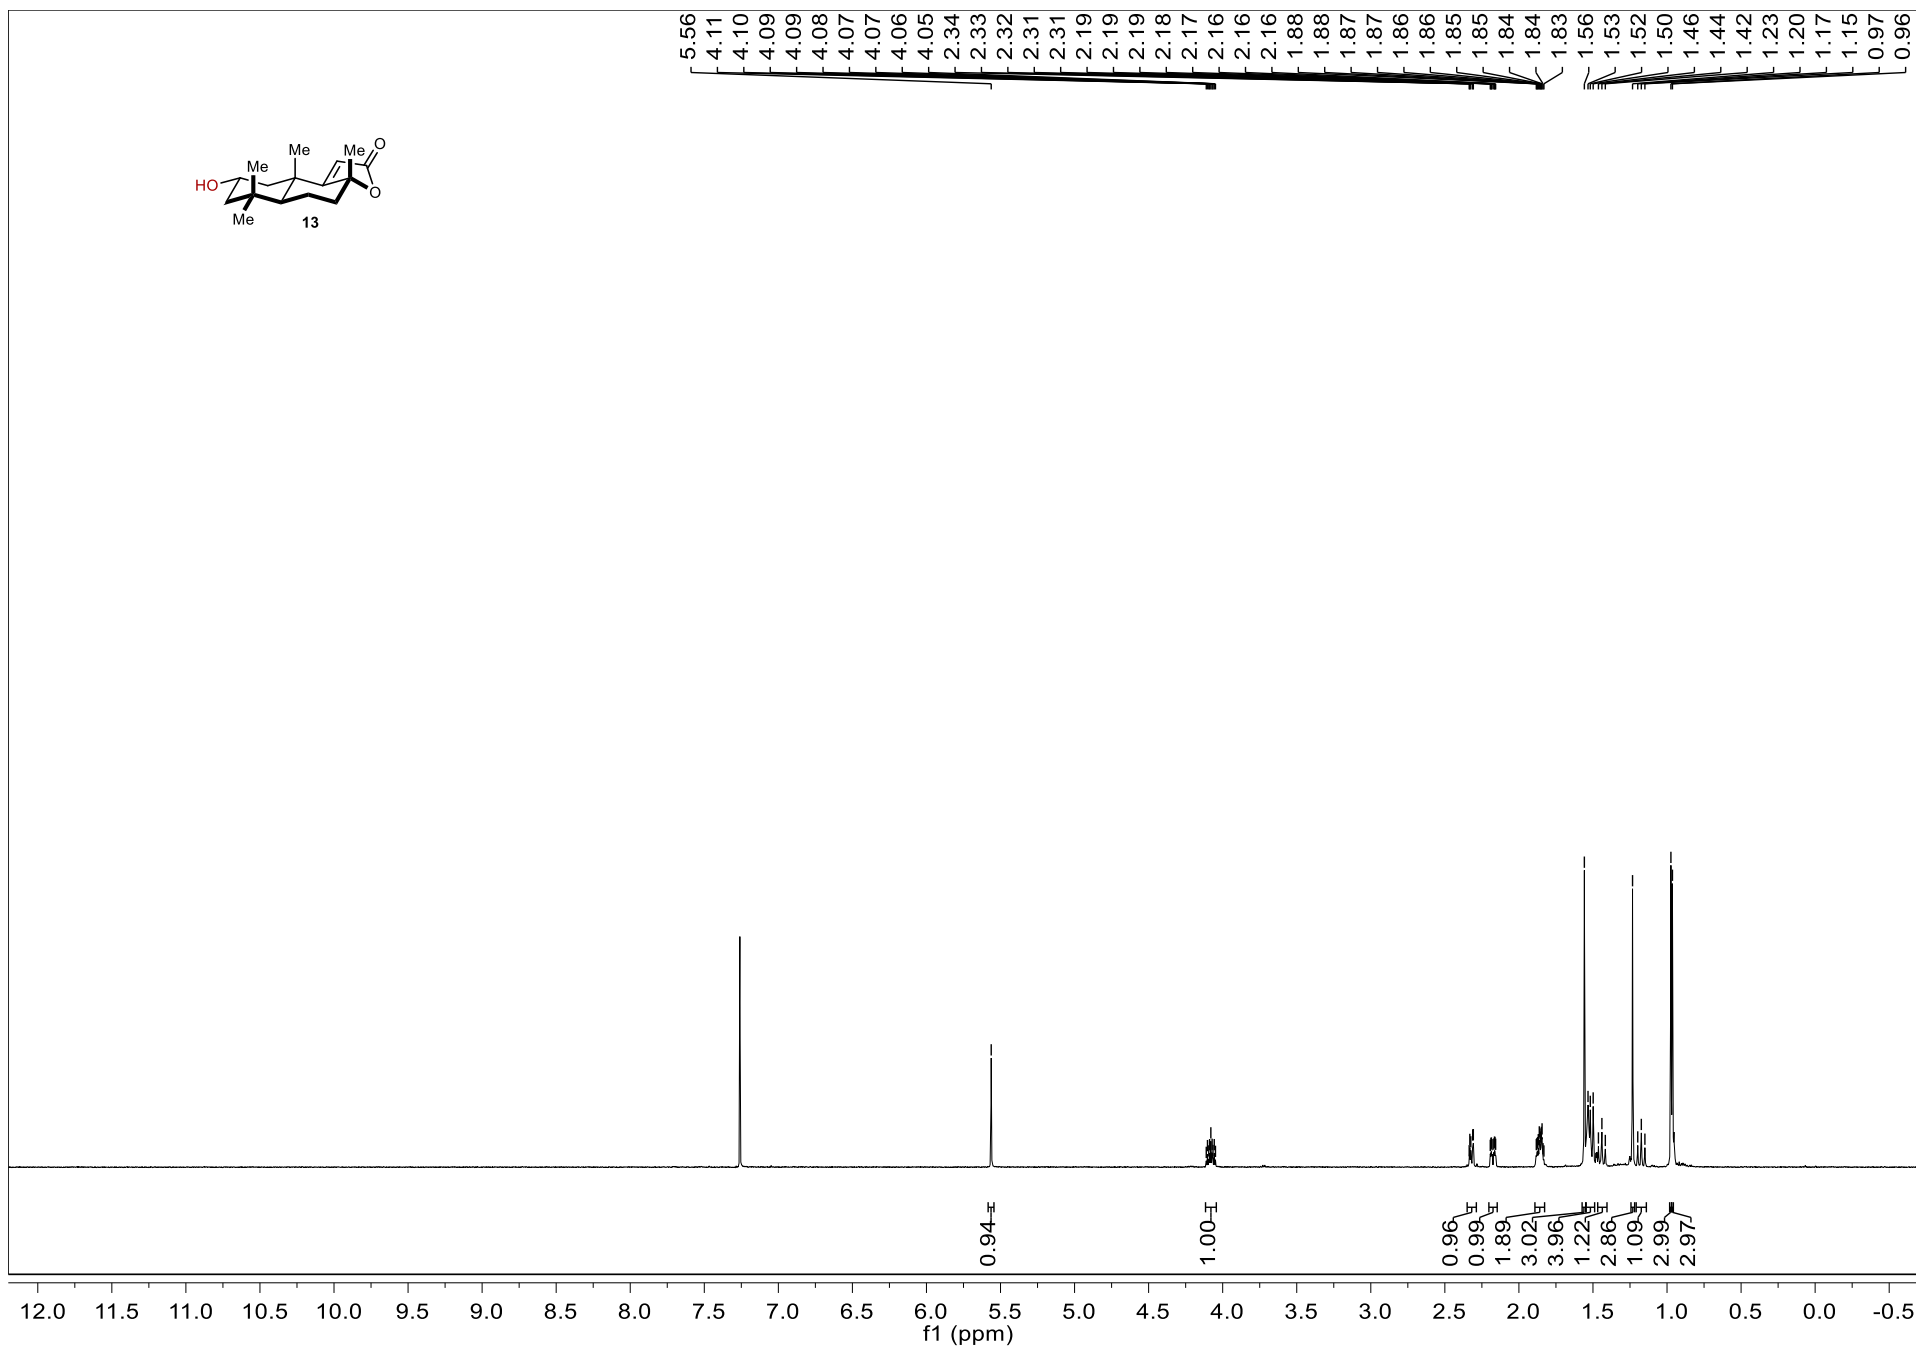

**$^{13}\text{C}$  NMR Spectrum of compound 13 (126 MHz,  $\text{CDCl}_3$ )**

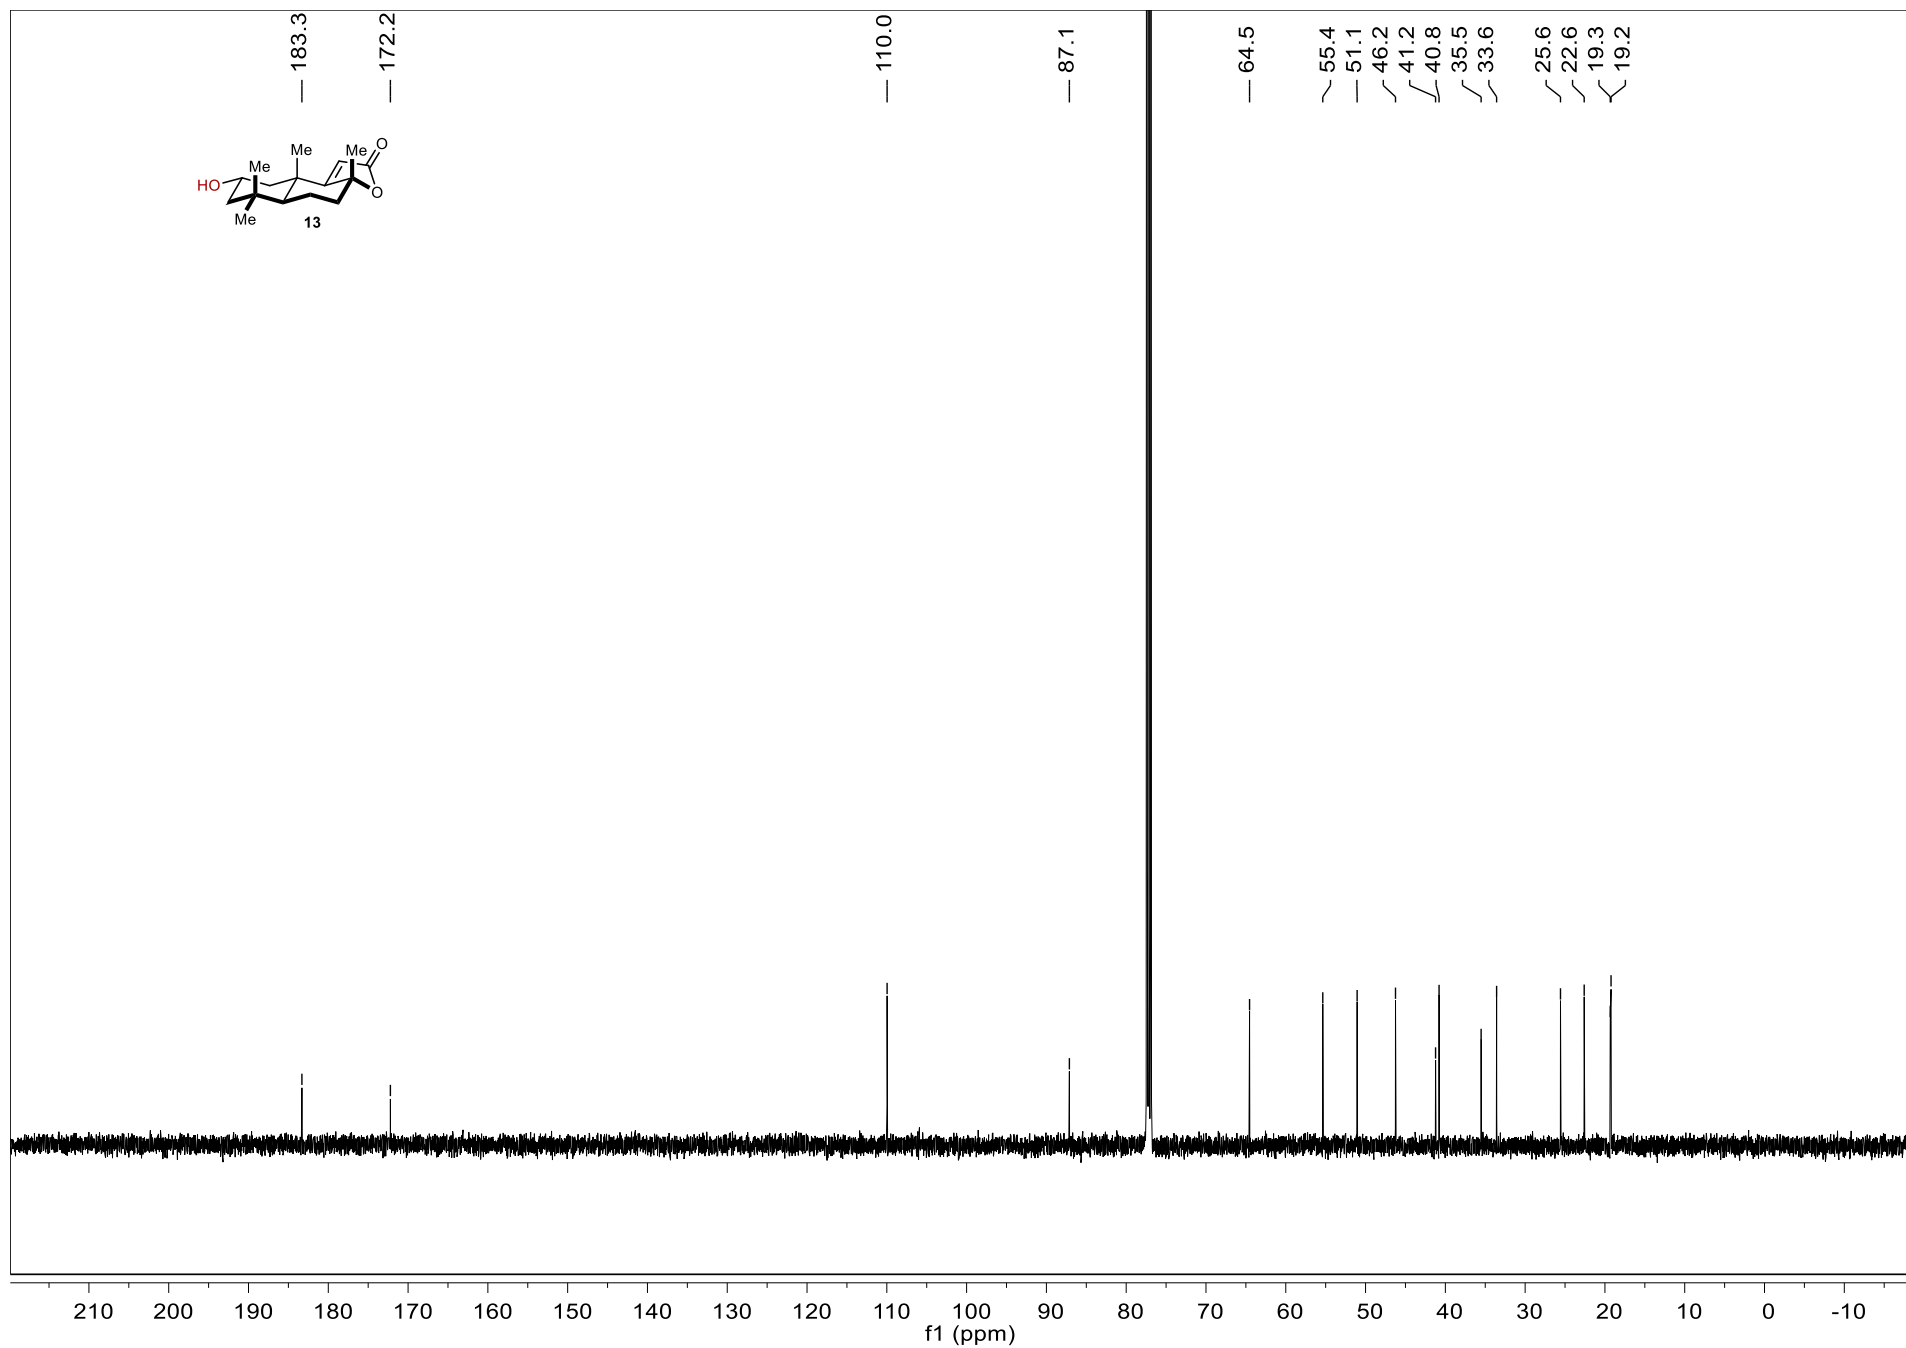

<sup>1</sup>H NMR Spectrum of compound 14 (500 MHz, CDCl<sub>3</sub>)

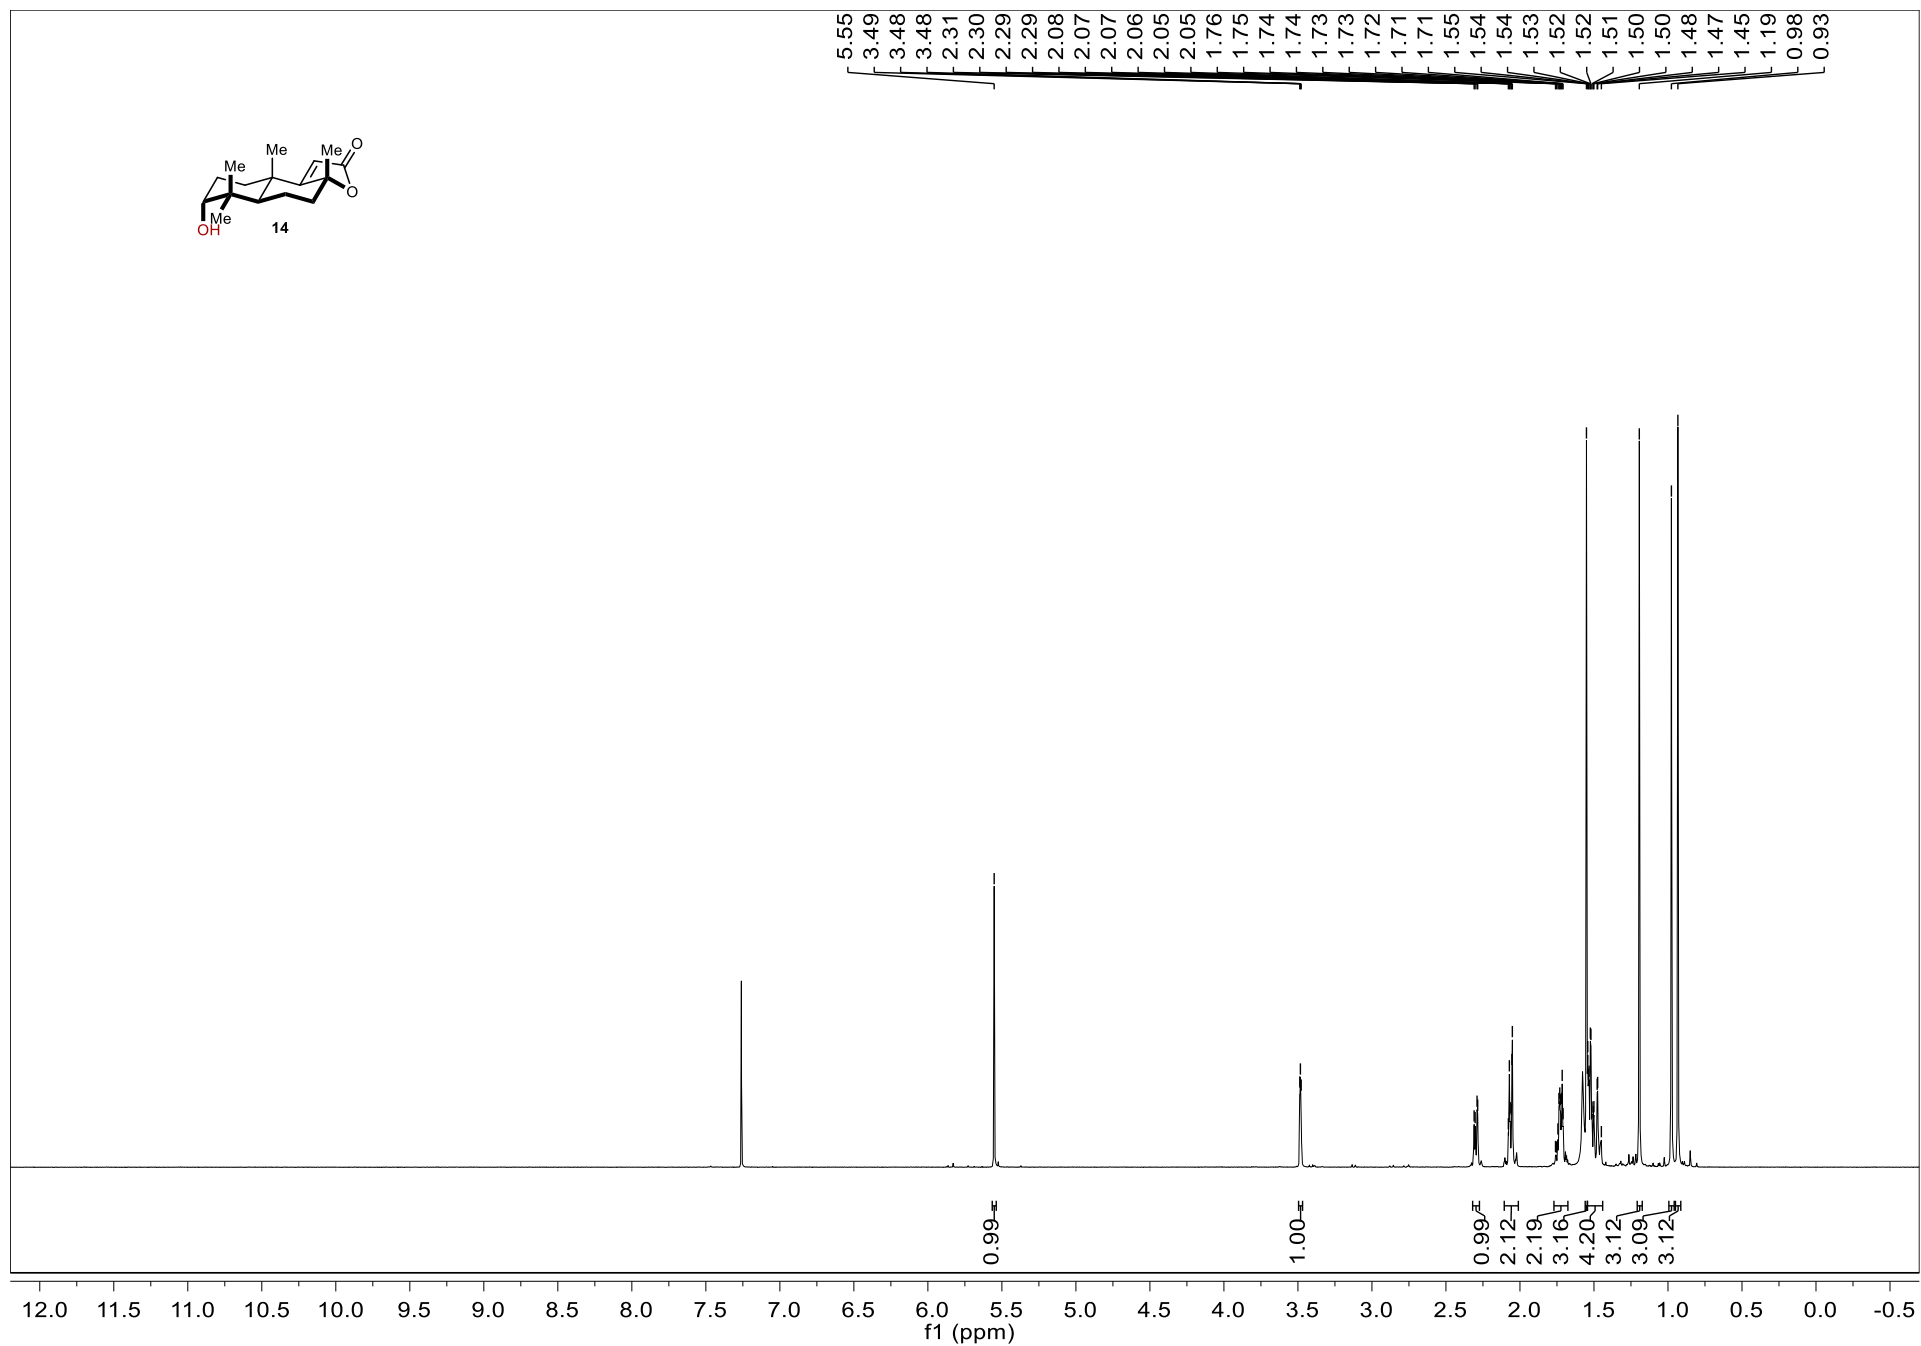

**$^{13}\text{C}$  NMR Spectrum of compound 14 (126 MHz,  $\text{CDCl}_3$ )**

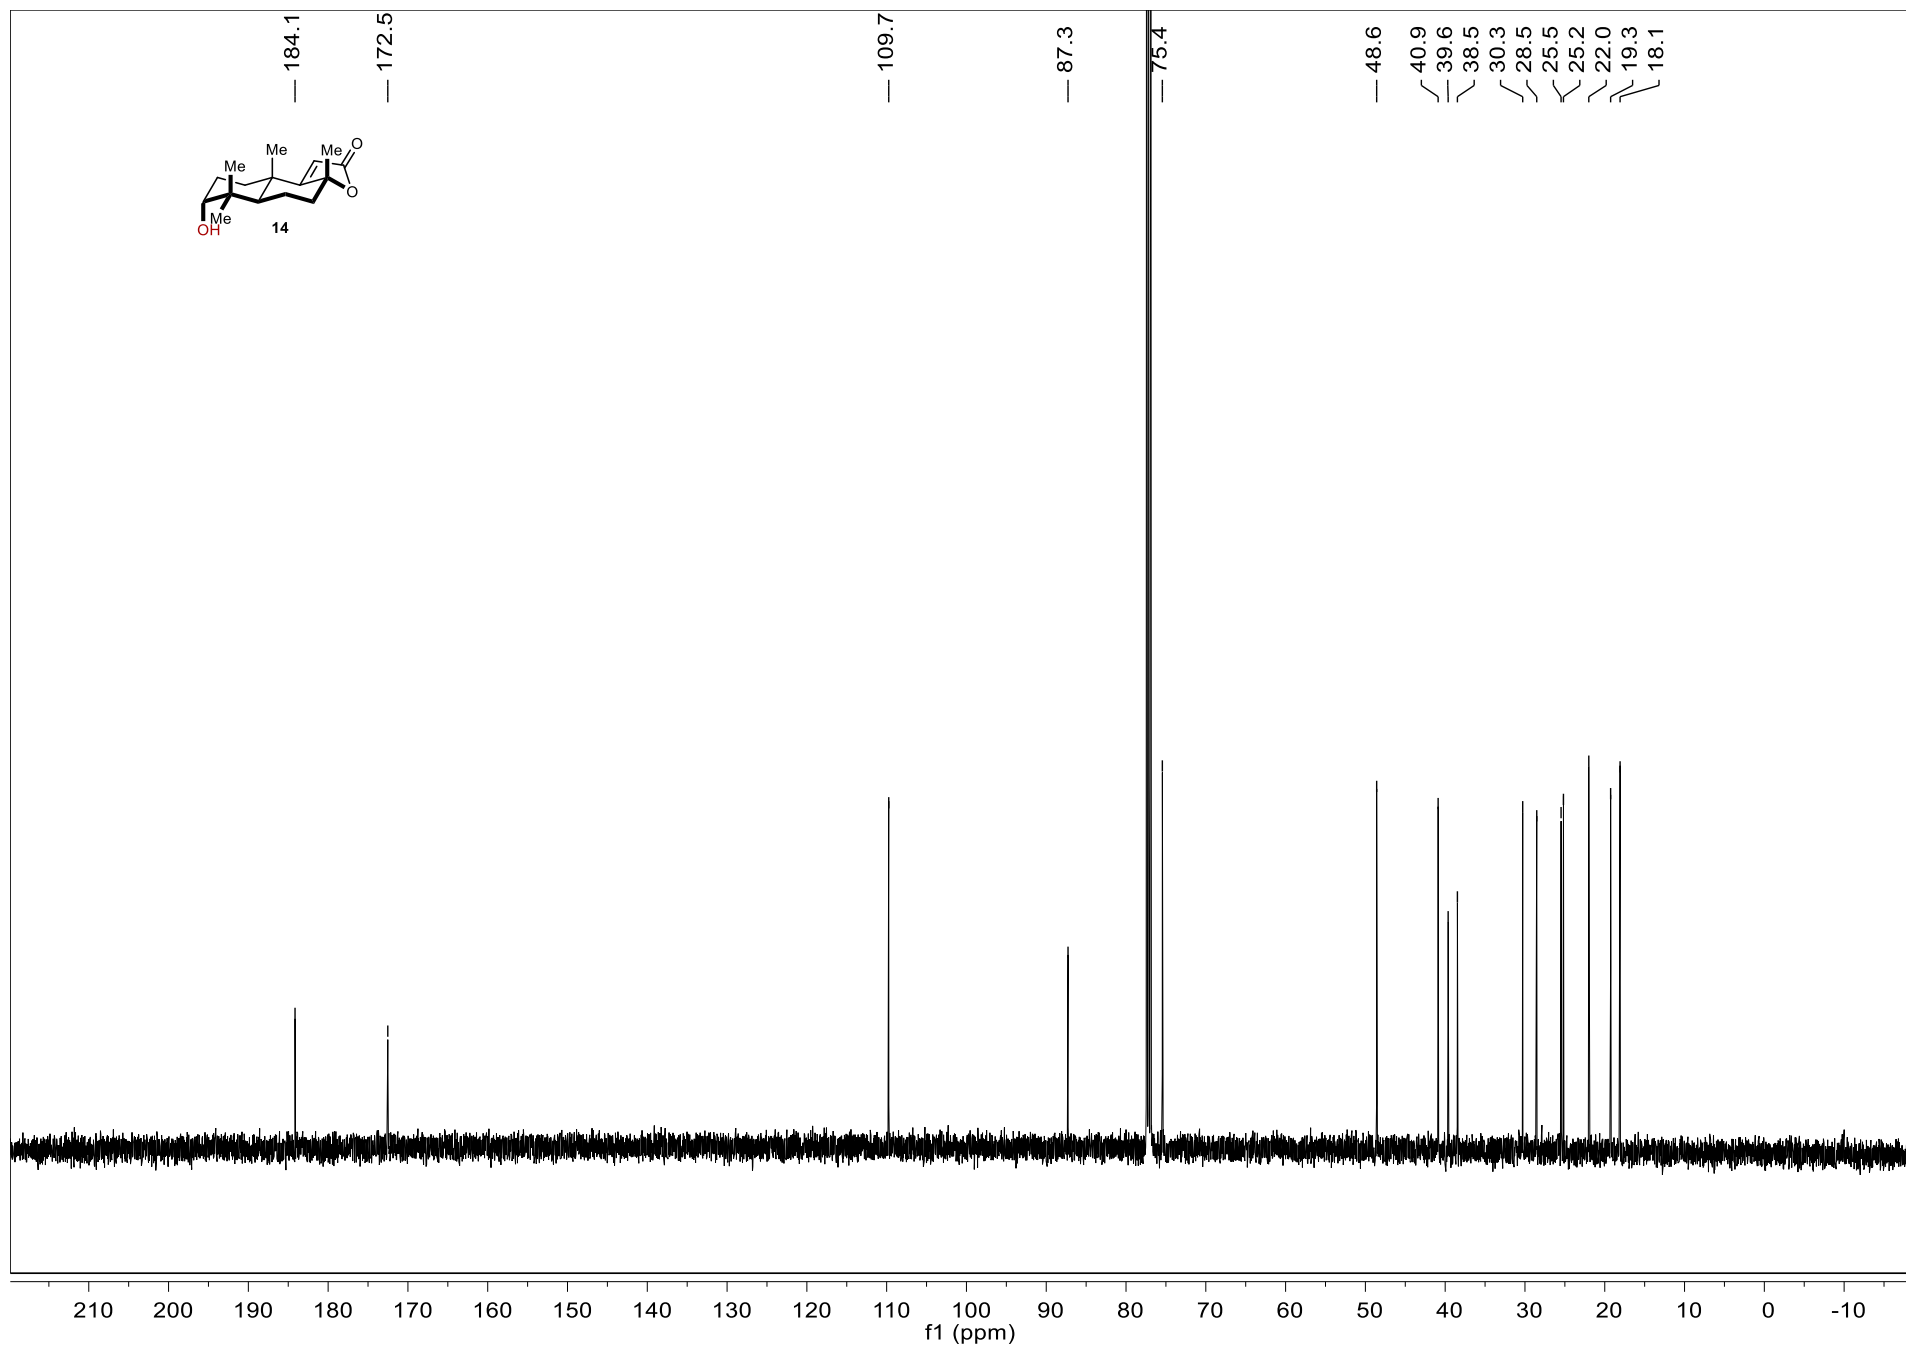

Chemical structure of compound **15** is shown in the top left corner. The structure is a bicyclic enone with a hydroxyl group and three methyl groups.

The <sup>1</sup>H NMR spectrum (400 MHz, CDCl<sub>3</sub>) shows the following peaks (ppm) and integration values:

| Chemical Shift (ppm) | Integration |
|----------------------|-------------|
| 5.52                 | 0.97        |
| 3.27                 | 1.00        |
| 3.26                 | 1.00        |
| 3.25                 | 3.19        |
| 3.24                 | 2.06        |
| 3.22                 | 4.87        |
| 2.31                 | 3.01        |
| 2.30                 | 3.05        |
| 2.29                 | 1.05        |
| 2.28                 | 3.00        |
| 1.87                 |             |
| 1.86                 |             |
| 1.85                 |             |
| 1.84                 |             |
| 1.83                 |             |
| 1.82                 |             |
| 1.81                 |             |
| 1.80                 |             |
| 1.79                 |             |
| 1.78                 |             |
| 1.76                 |             |
| 1.75                 |             |
| 1.74                 |             |
| 1.73                 |             |
| 1.72                 |             |
| 1.71                 |             |
| 1.70                 |             |
| 1.68                 |             |
| 1.67                 |             |
| 1.65                 |             |
| 1.63                 |             |
| 1.62                 |             |
| 1.55                 |             |
| 1.52                 |             |
| 1.52                 |             |
| 1.51                 |             |
| 1.50                 |             |
| 1.48                 |             |
| 1.47                 |             |
| 1.45                 |             |
| 1.45                 |             |
| 1.19                 |             |
| 1.01                 |             |
| 0.94                 |             |
| 0.94                 |             |
| 0.92                 |             |
| 0.91                 |             |
| 0.88                 |             |

**$^1\text{H}$  NMR Spectrum of compound 15 (500 MHz,  $\text{CDCl}_3$ )**

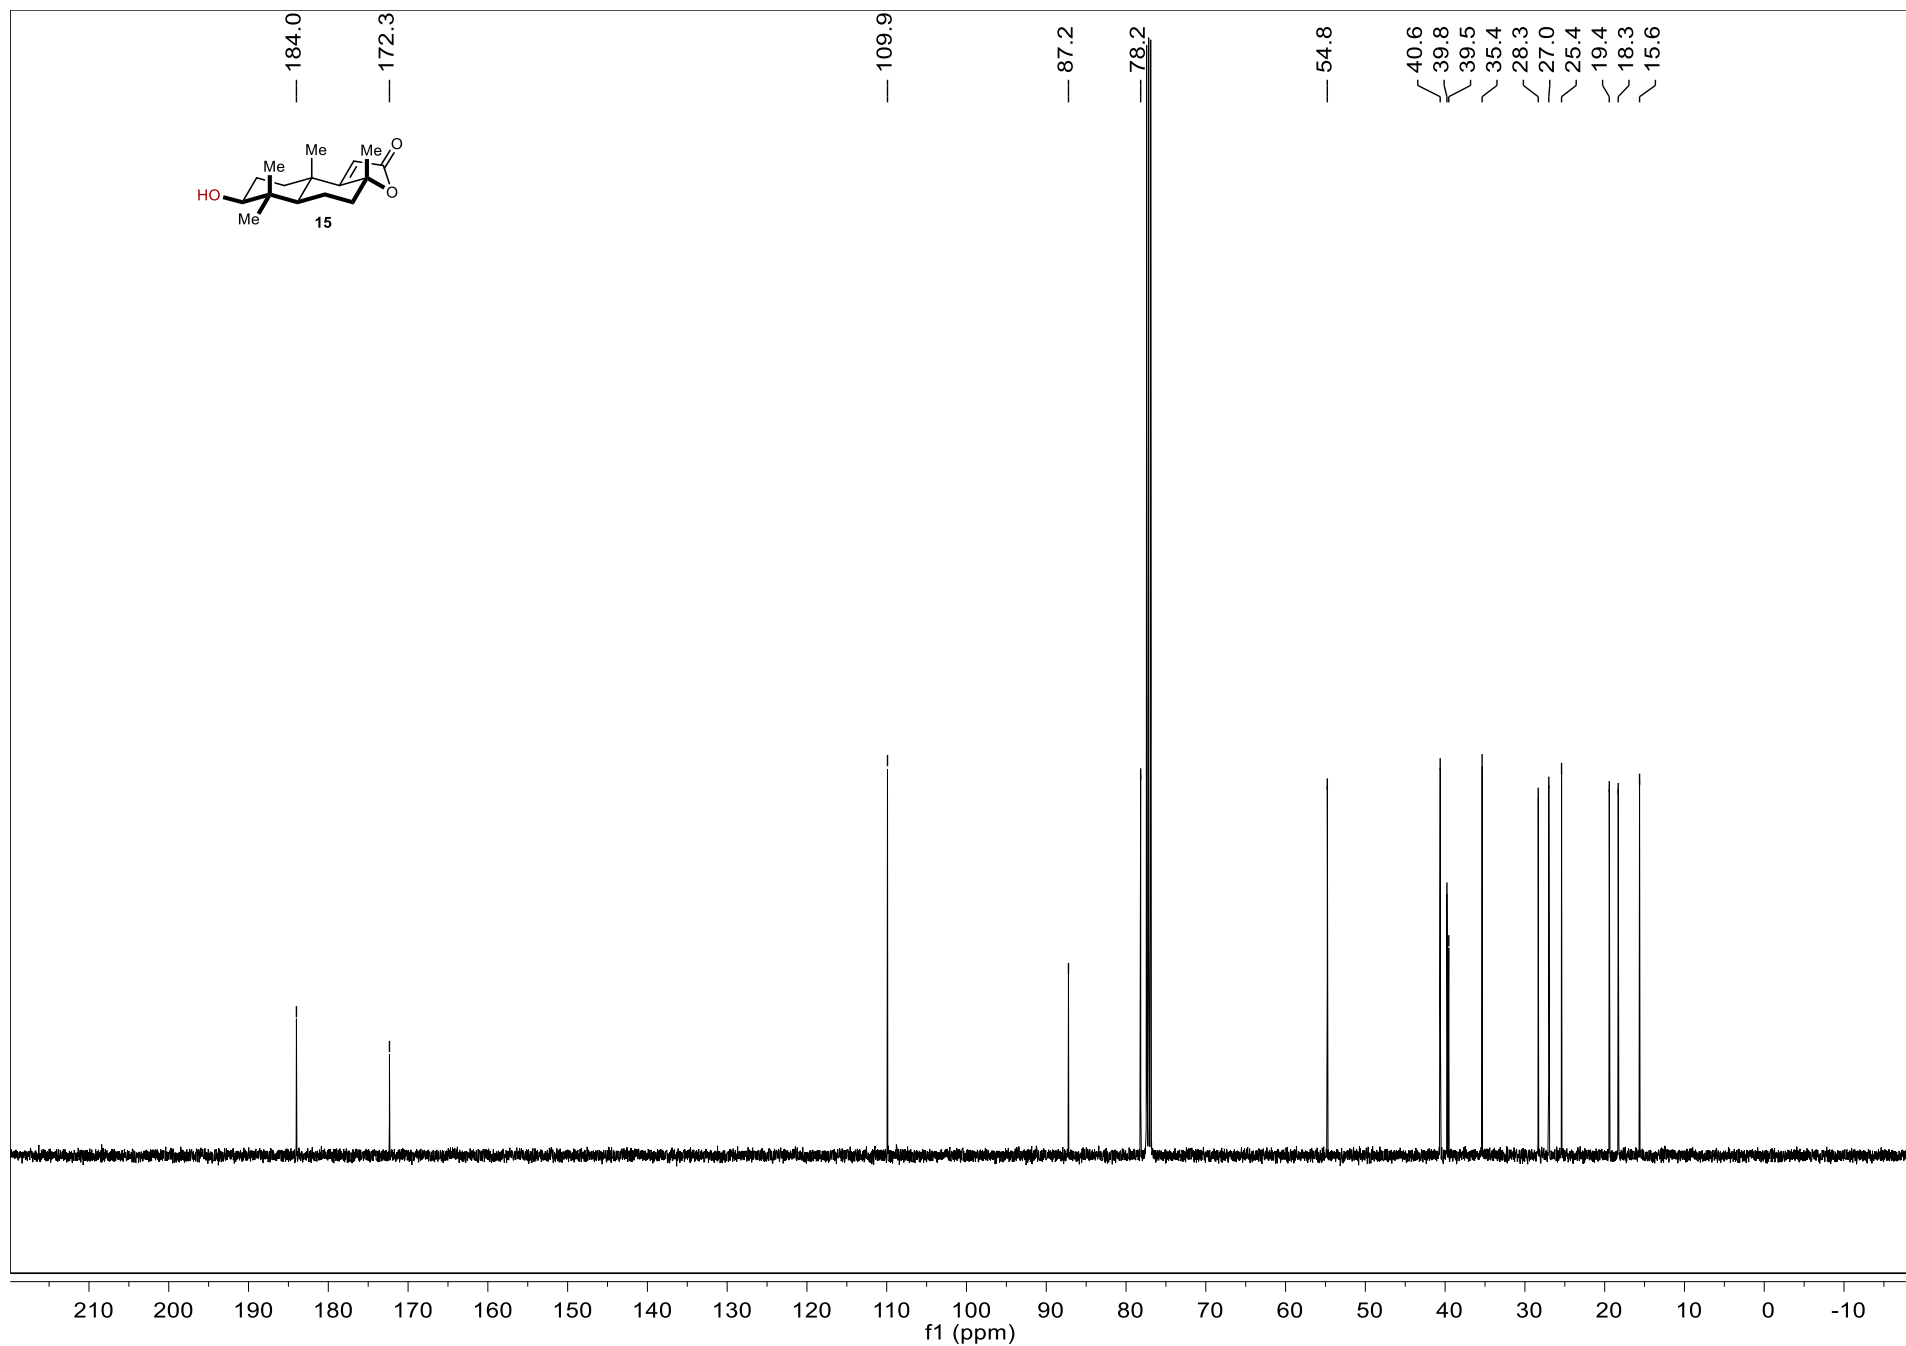

**$^1\text{H}$  NMR Spectrum of compound 16 (500 MHz,  $\text{CDCl}_3$ )**

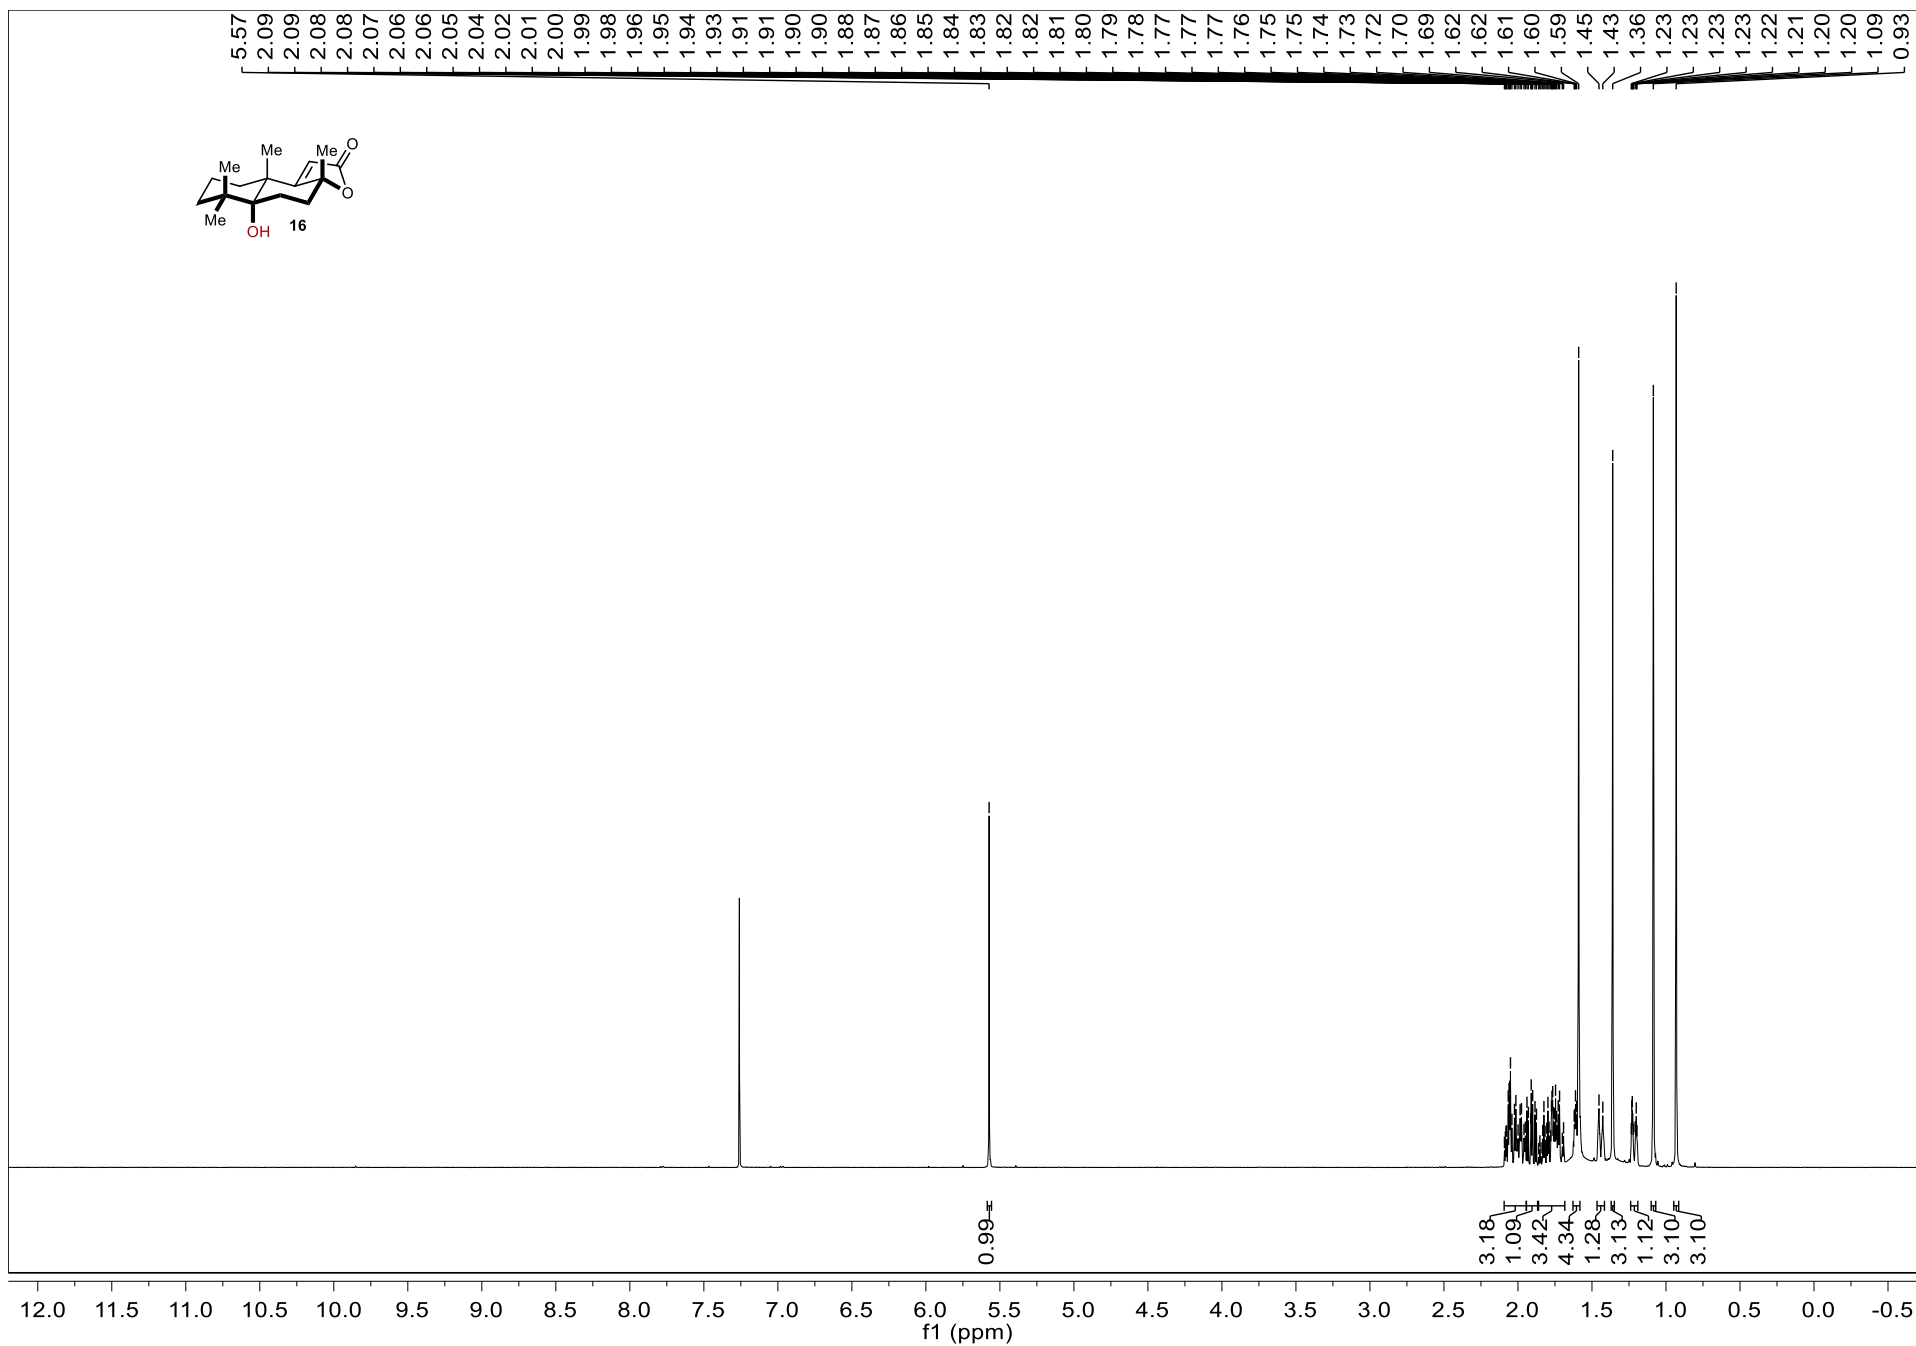

**$^{13}\text{C}$  NMR Spectrum of compound 16 (126 MHz,  $\text{CDCl}_3$ )**

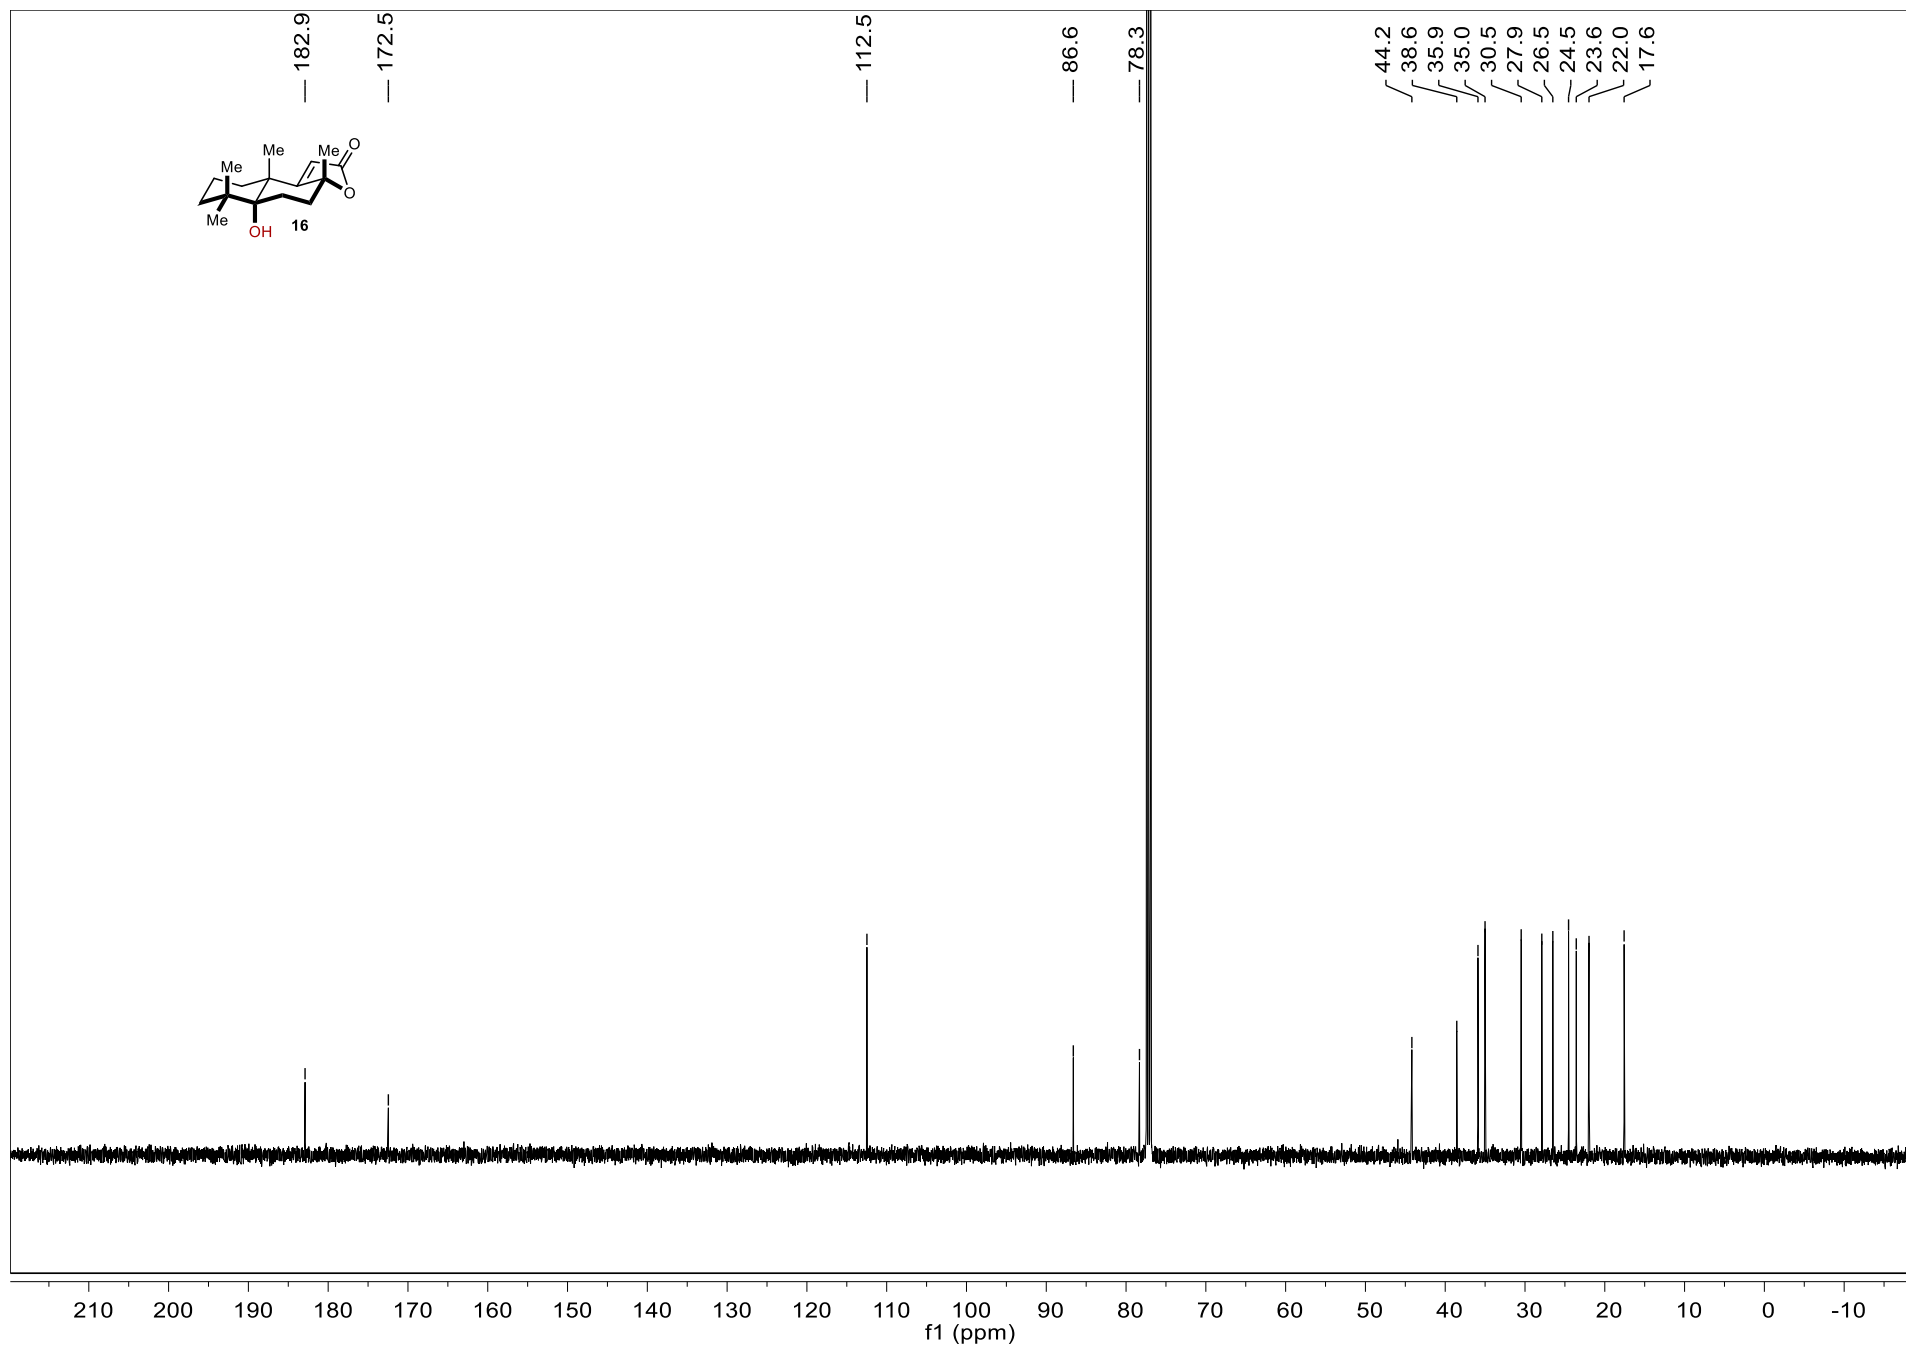



**$^1\text{H}$  NMR Spectrum of compound 17 (500 MHz,  $\text{CDCl}_3$ )**

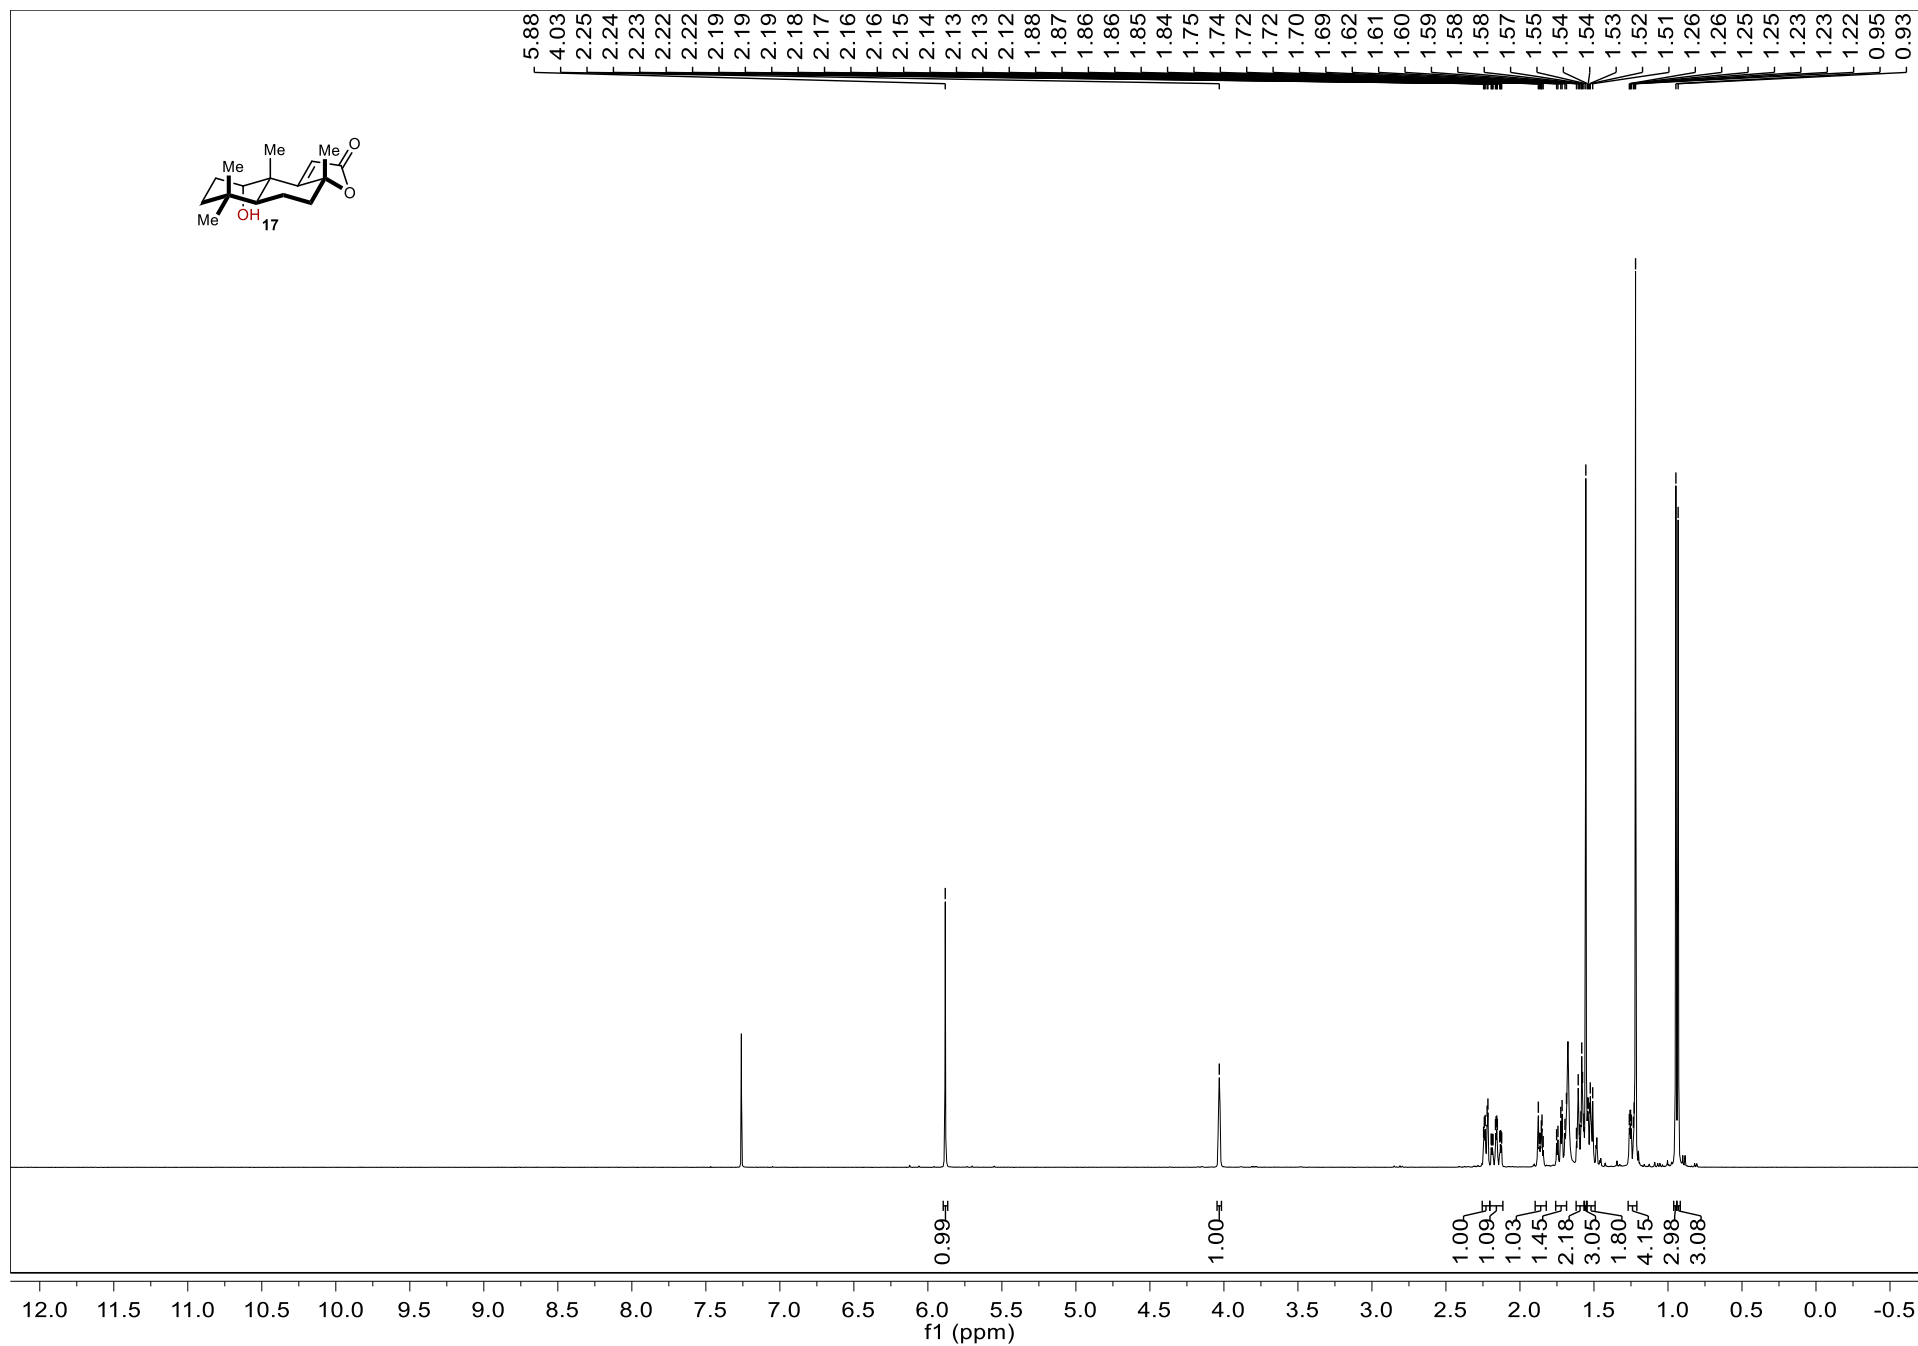

**$^{13}\text{C}$  NMR Spectrum of compound 17 (126 MHz,  $\text{CDCl}_3$ )**

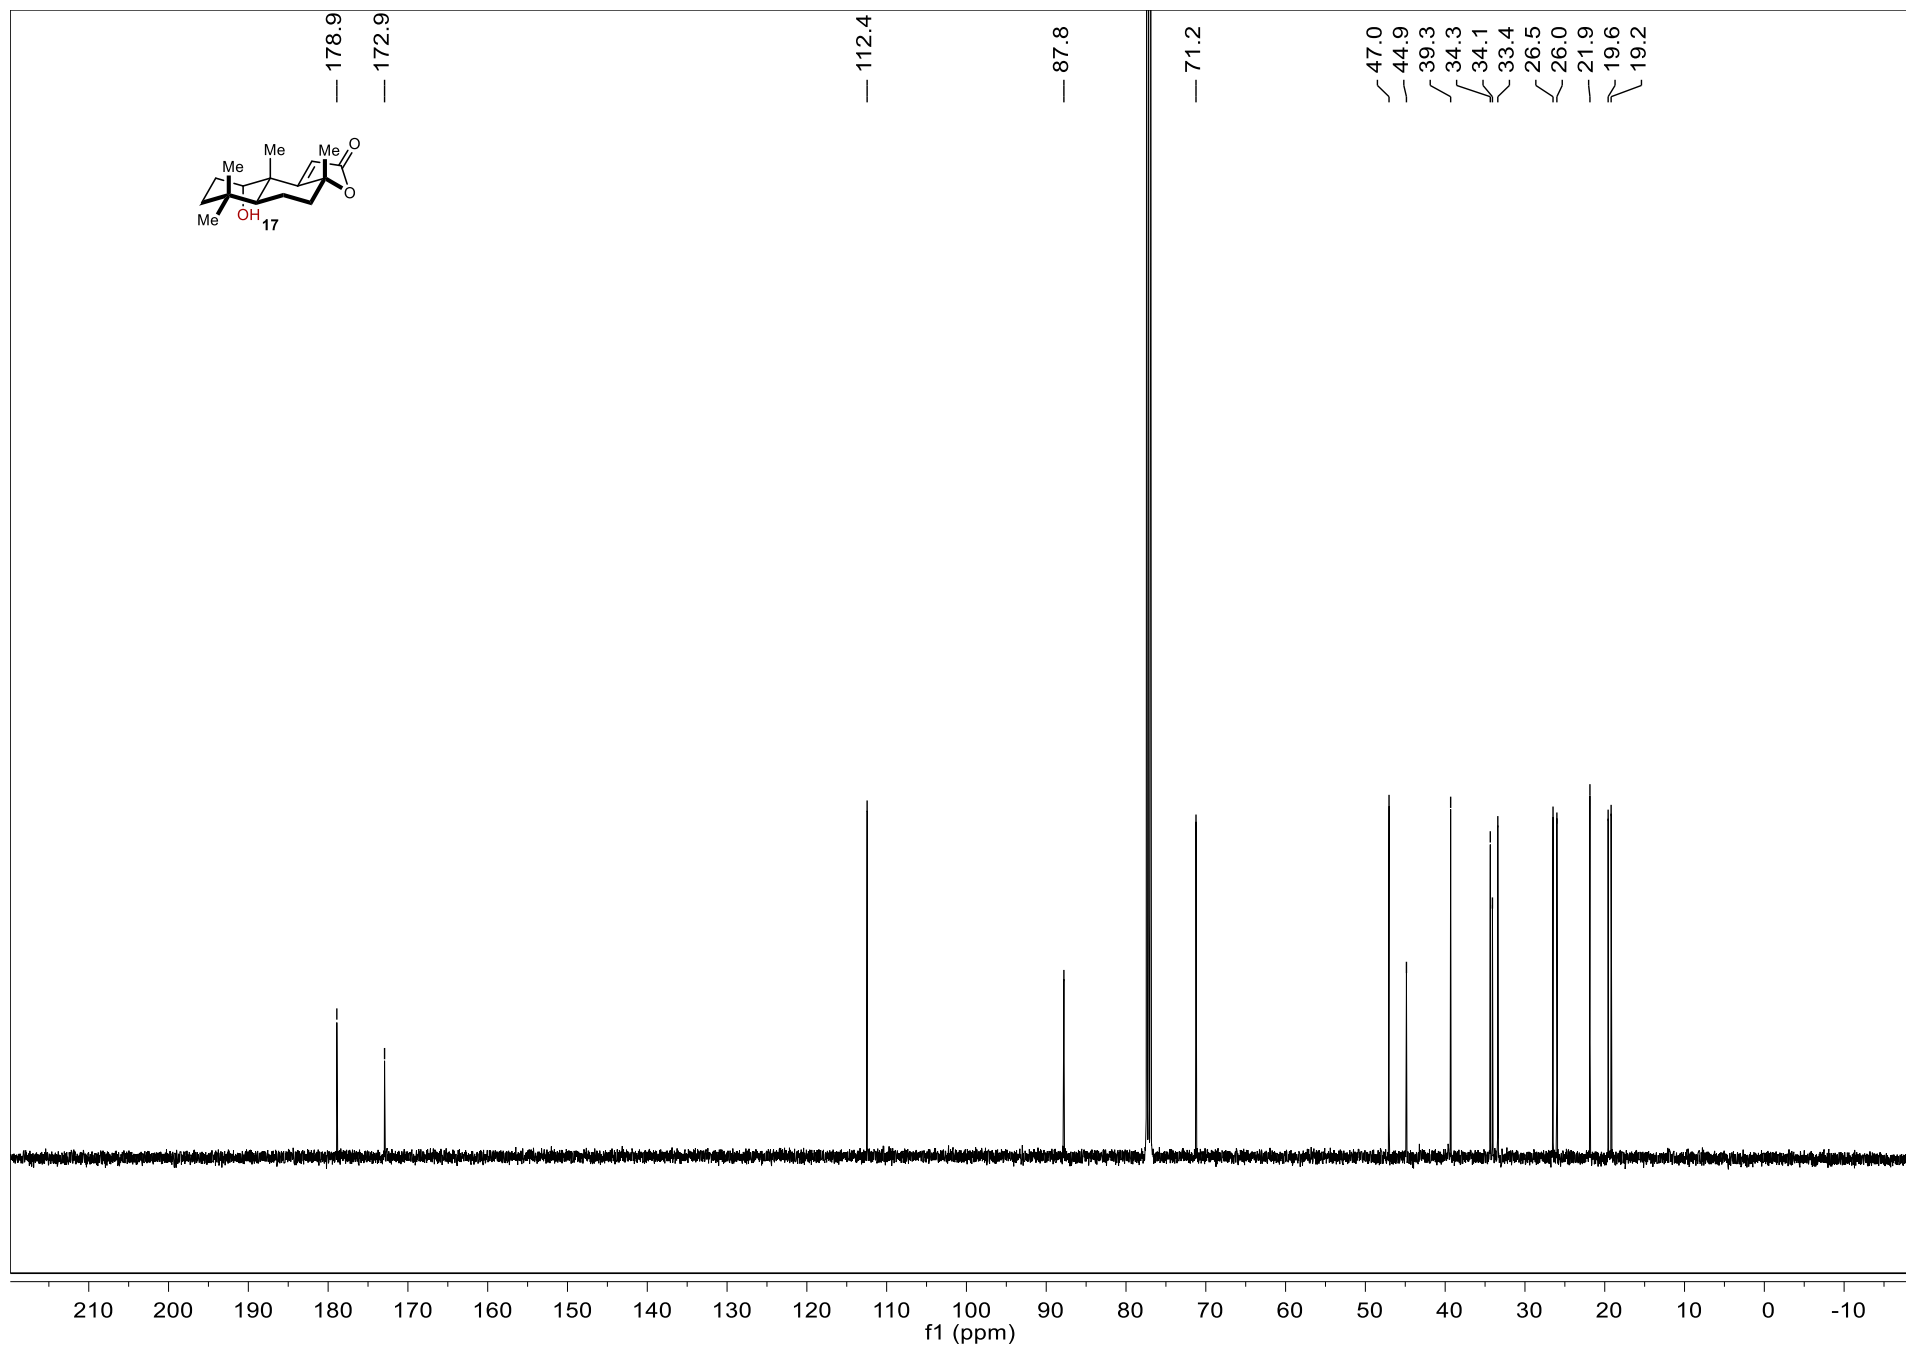

<sup>1</sup>H NMR Spectrum of compound 18 (500 MHz, CDCl<sub>3</sub>)

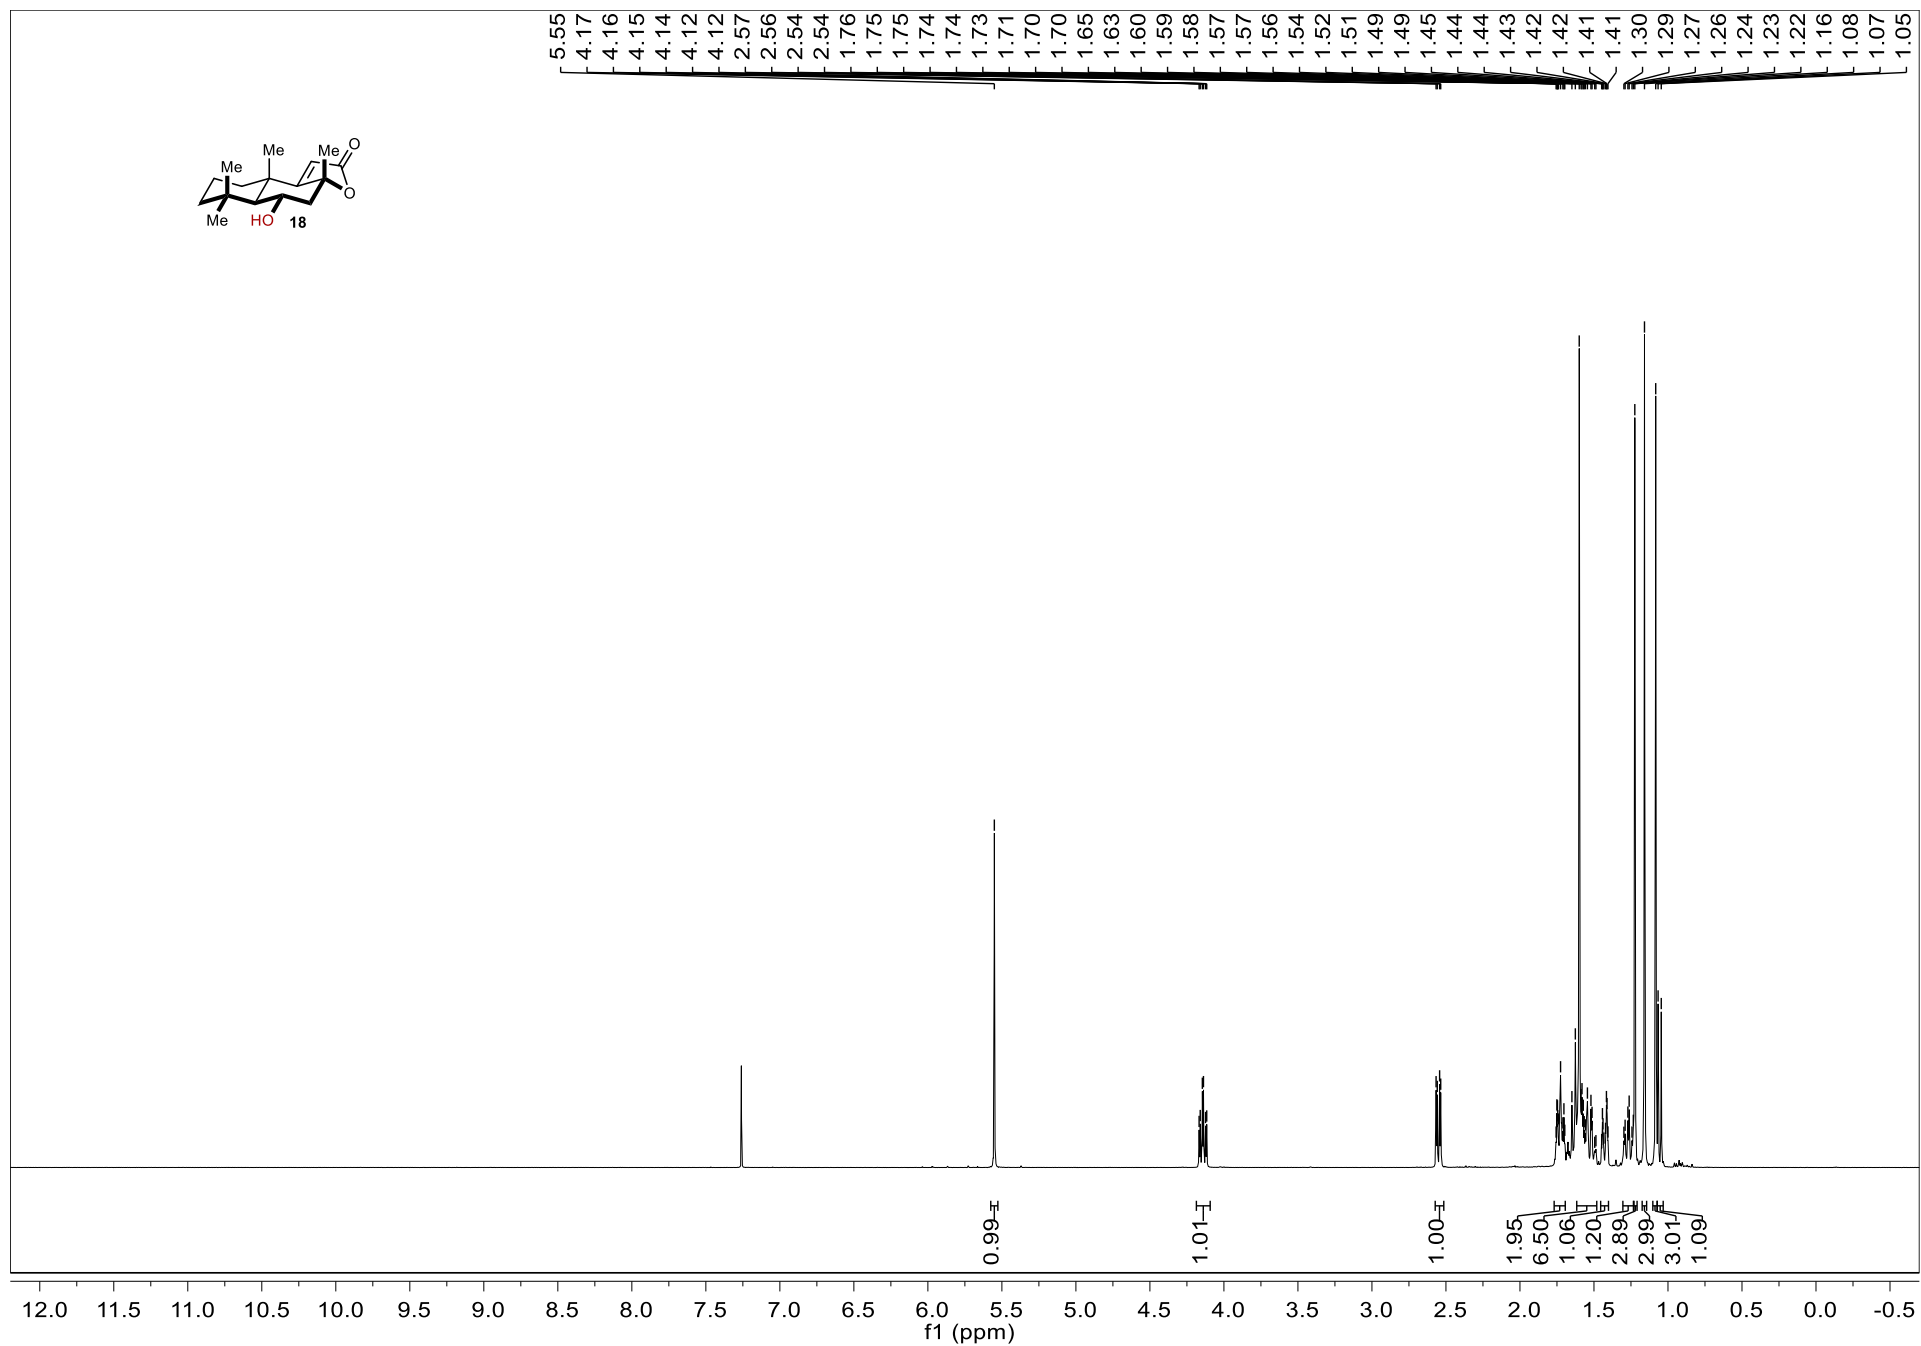

**$^{13}\text{C}$  NMR Spectrum of compound 18 (126 MHz,  $\text{CDCl}_3$ )**

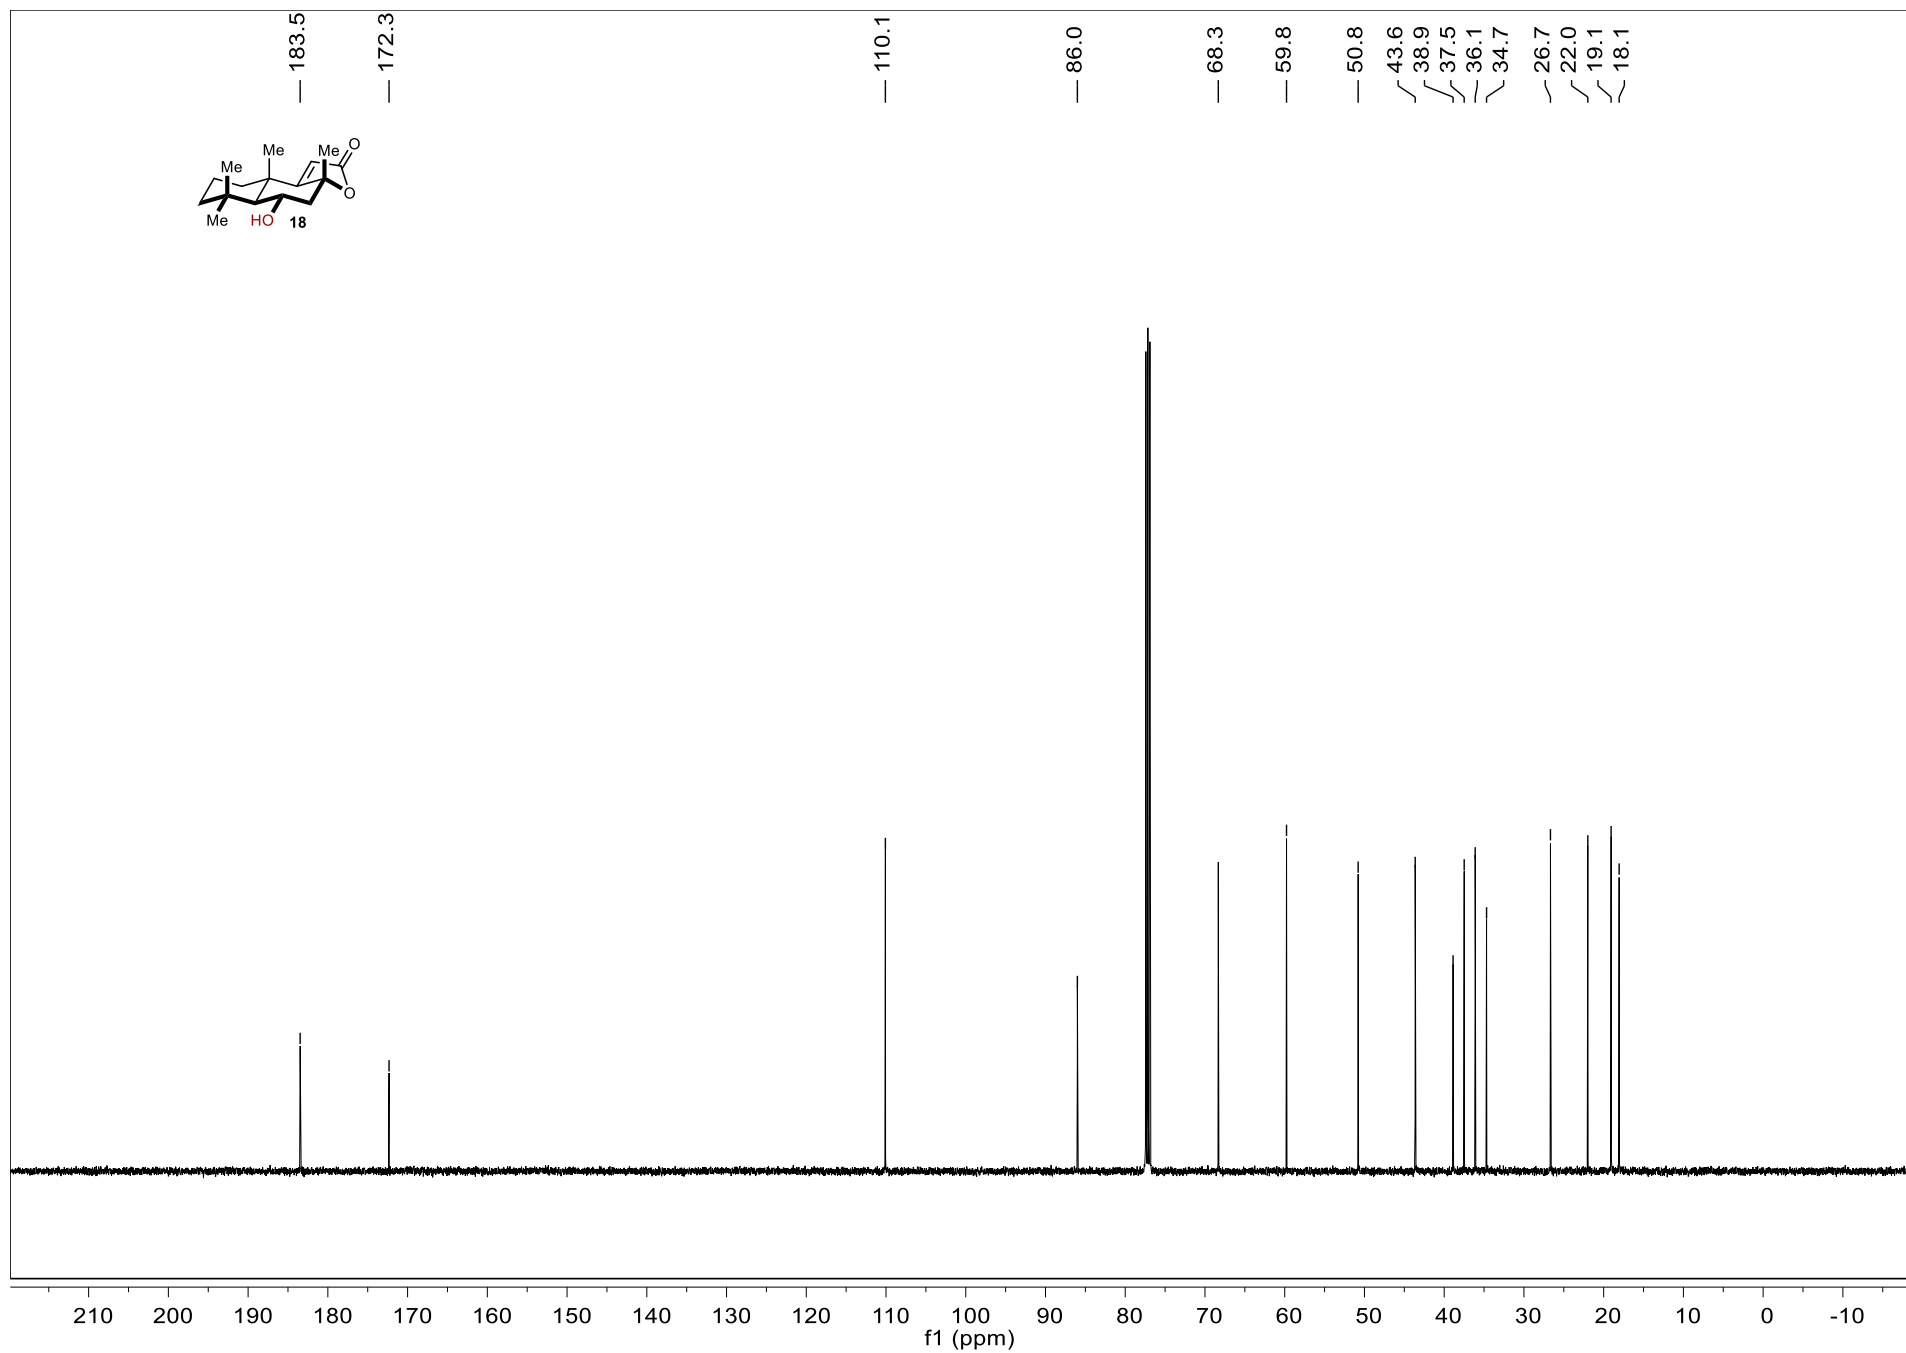

**<sup>1</sup>H NMR Spectrum of compound 19 (500 MHz, Methanol-*d*<sub>4</sub>)**

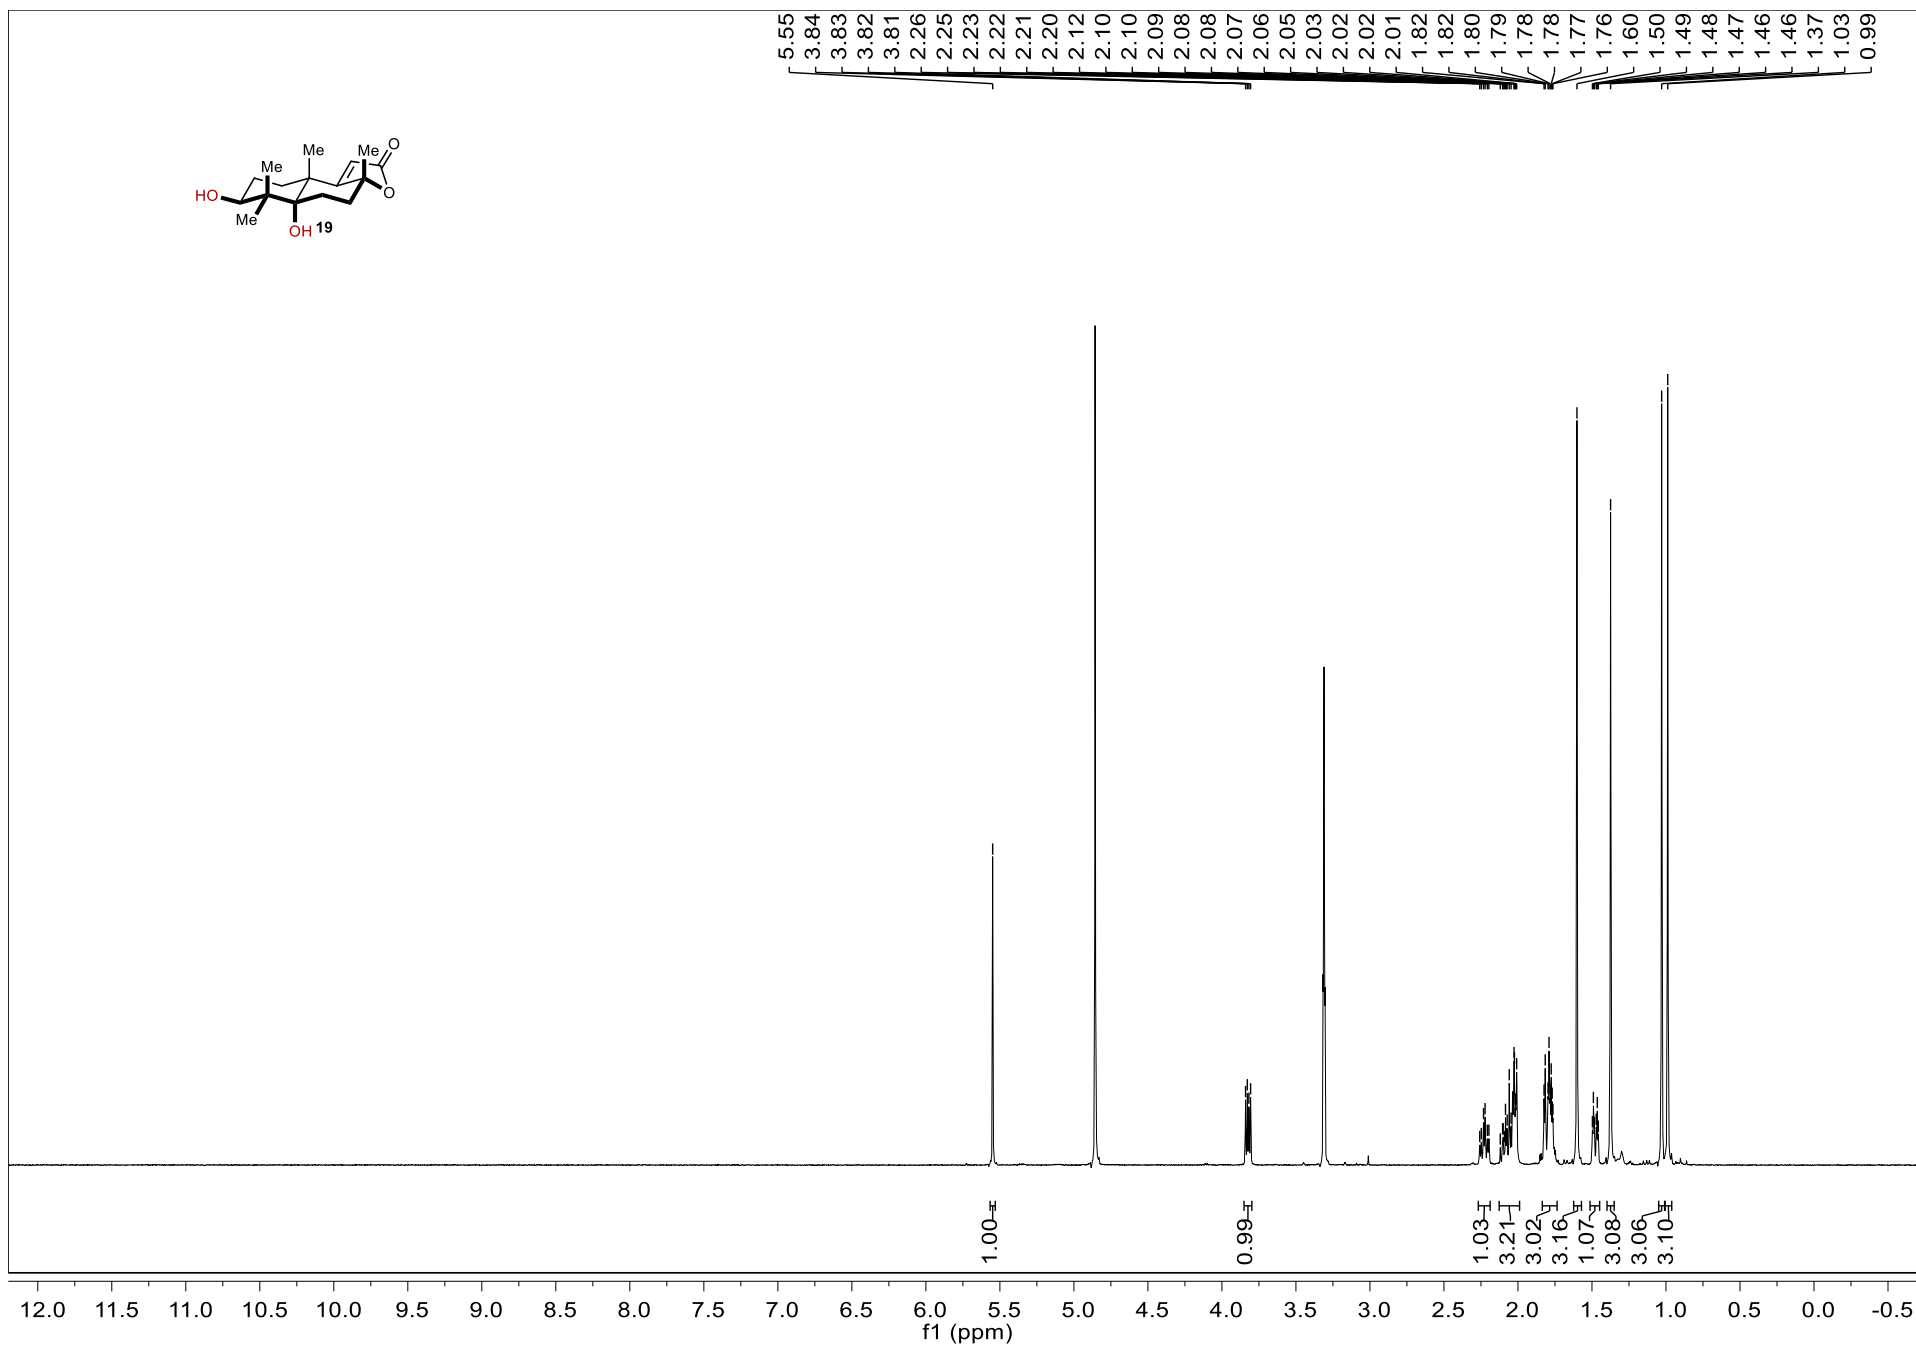

**$^1\text{H}$  NMR Spectrum of compound 19 (126 MHz, Methanol- $d_4$ )**

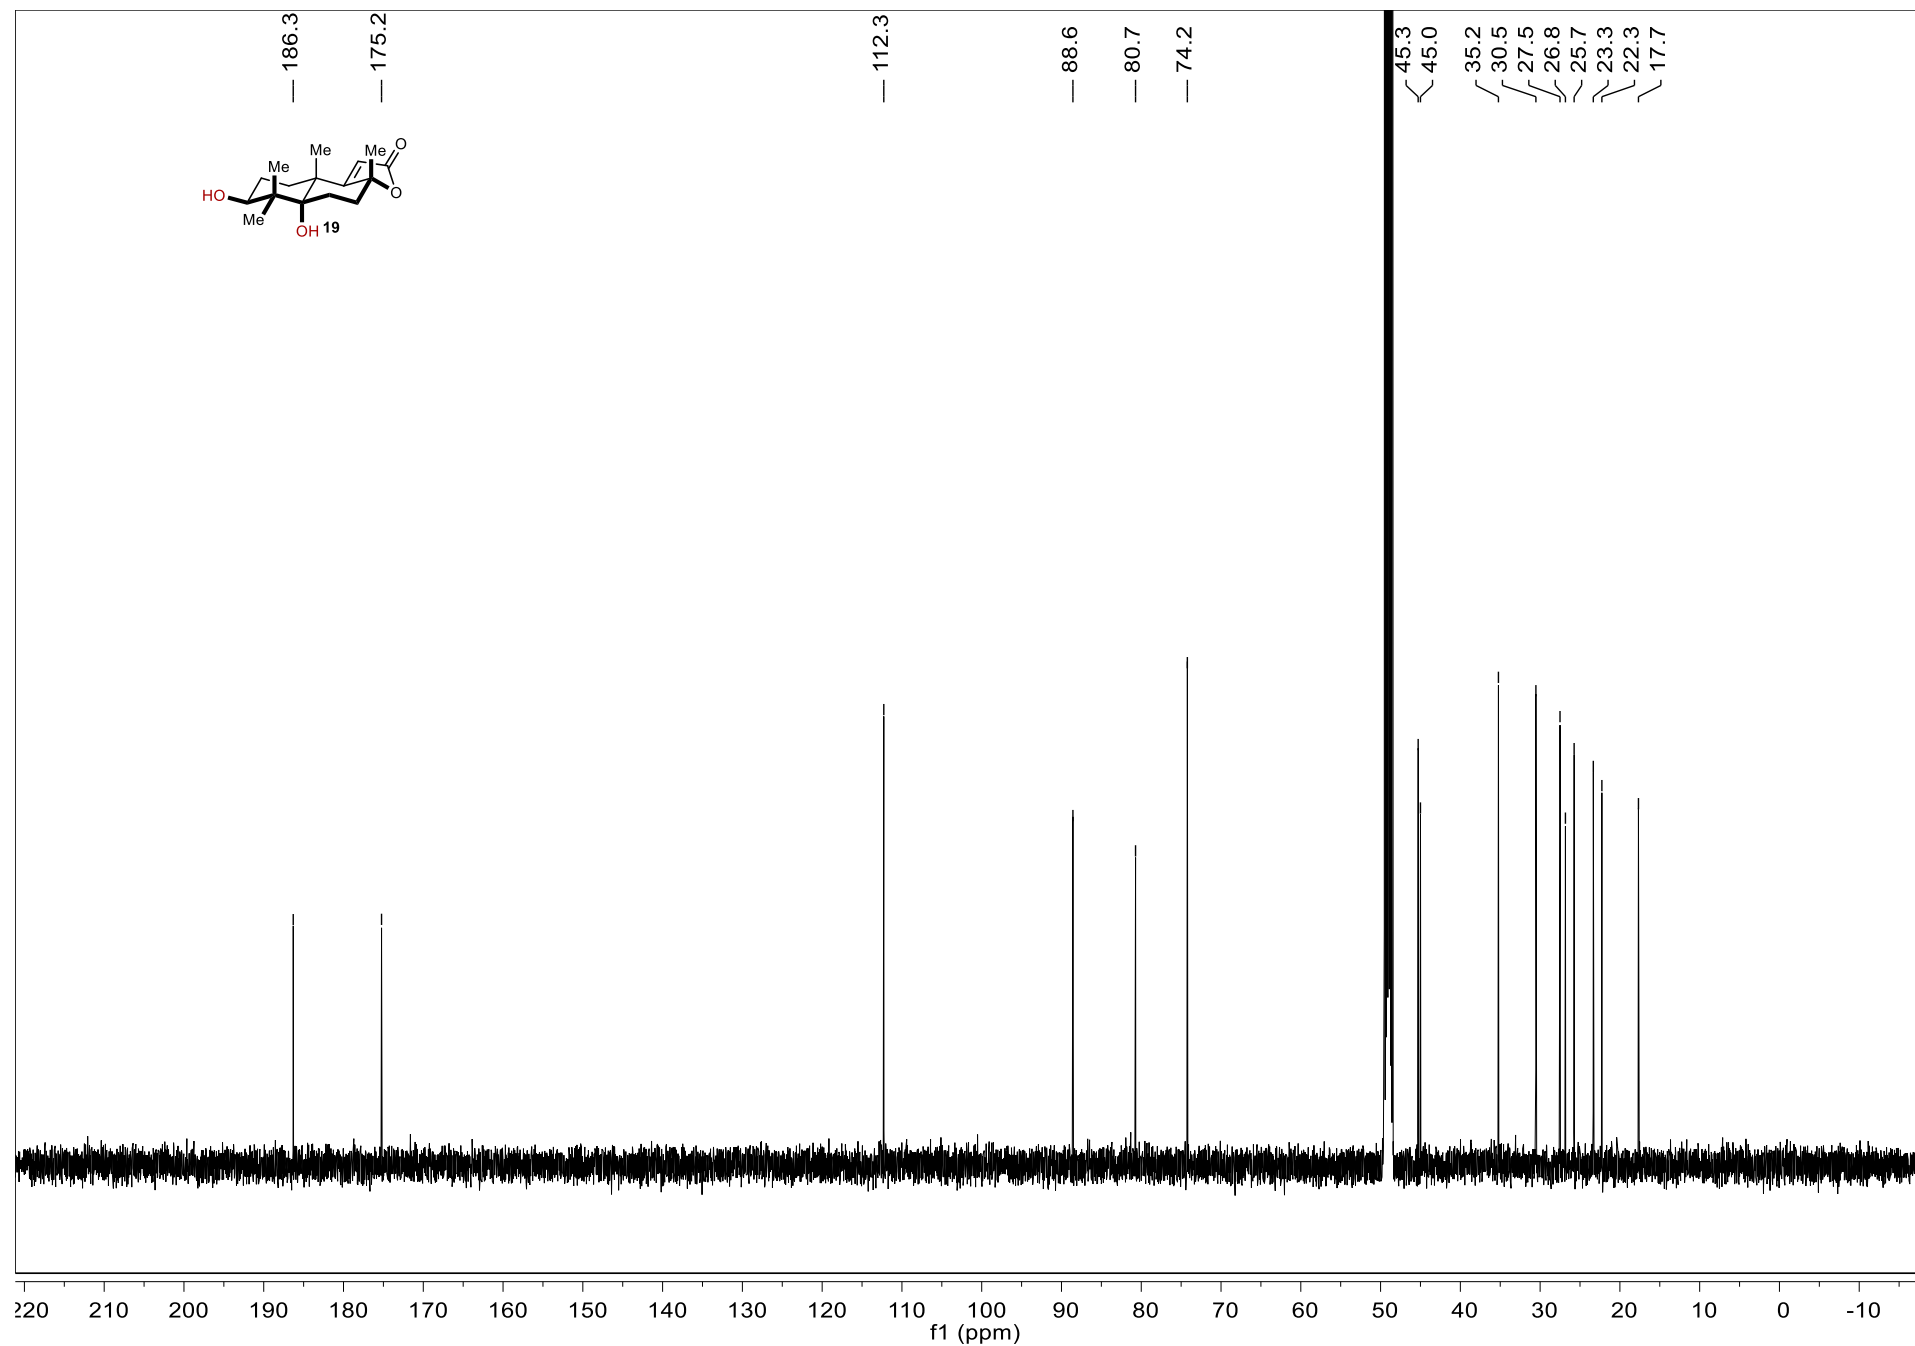

**<sup>1</sup>H NMR Spectrum of compound 20 (500 MHz, Methanol-*d*<sub>4</sub>)**

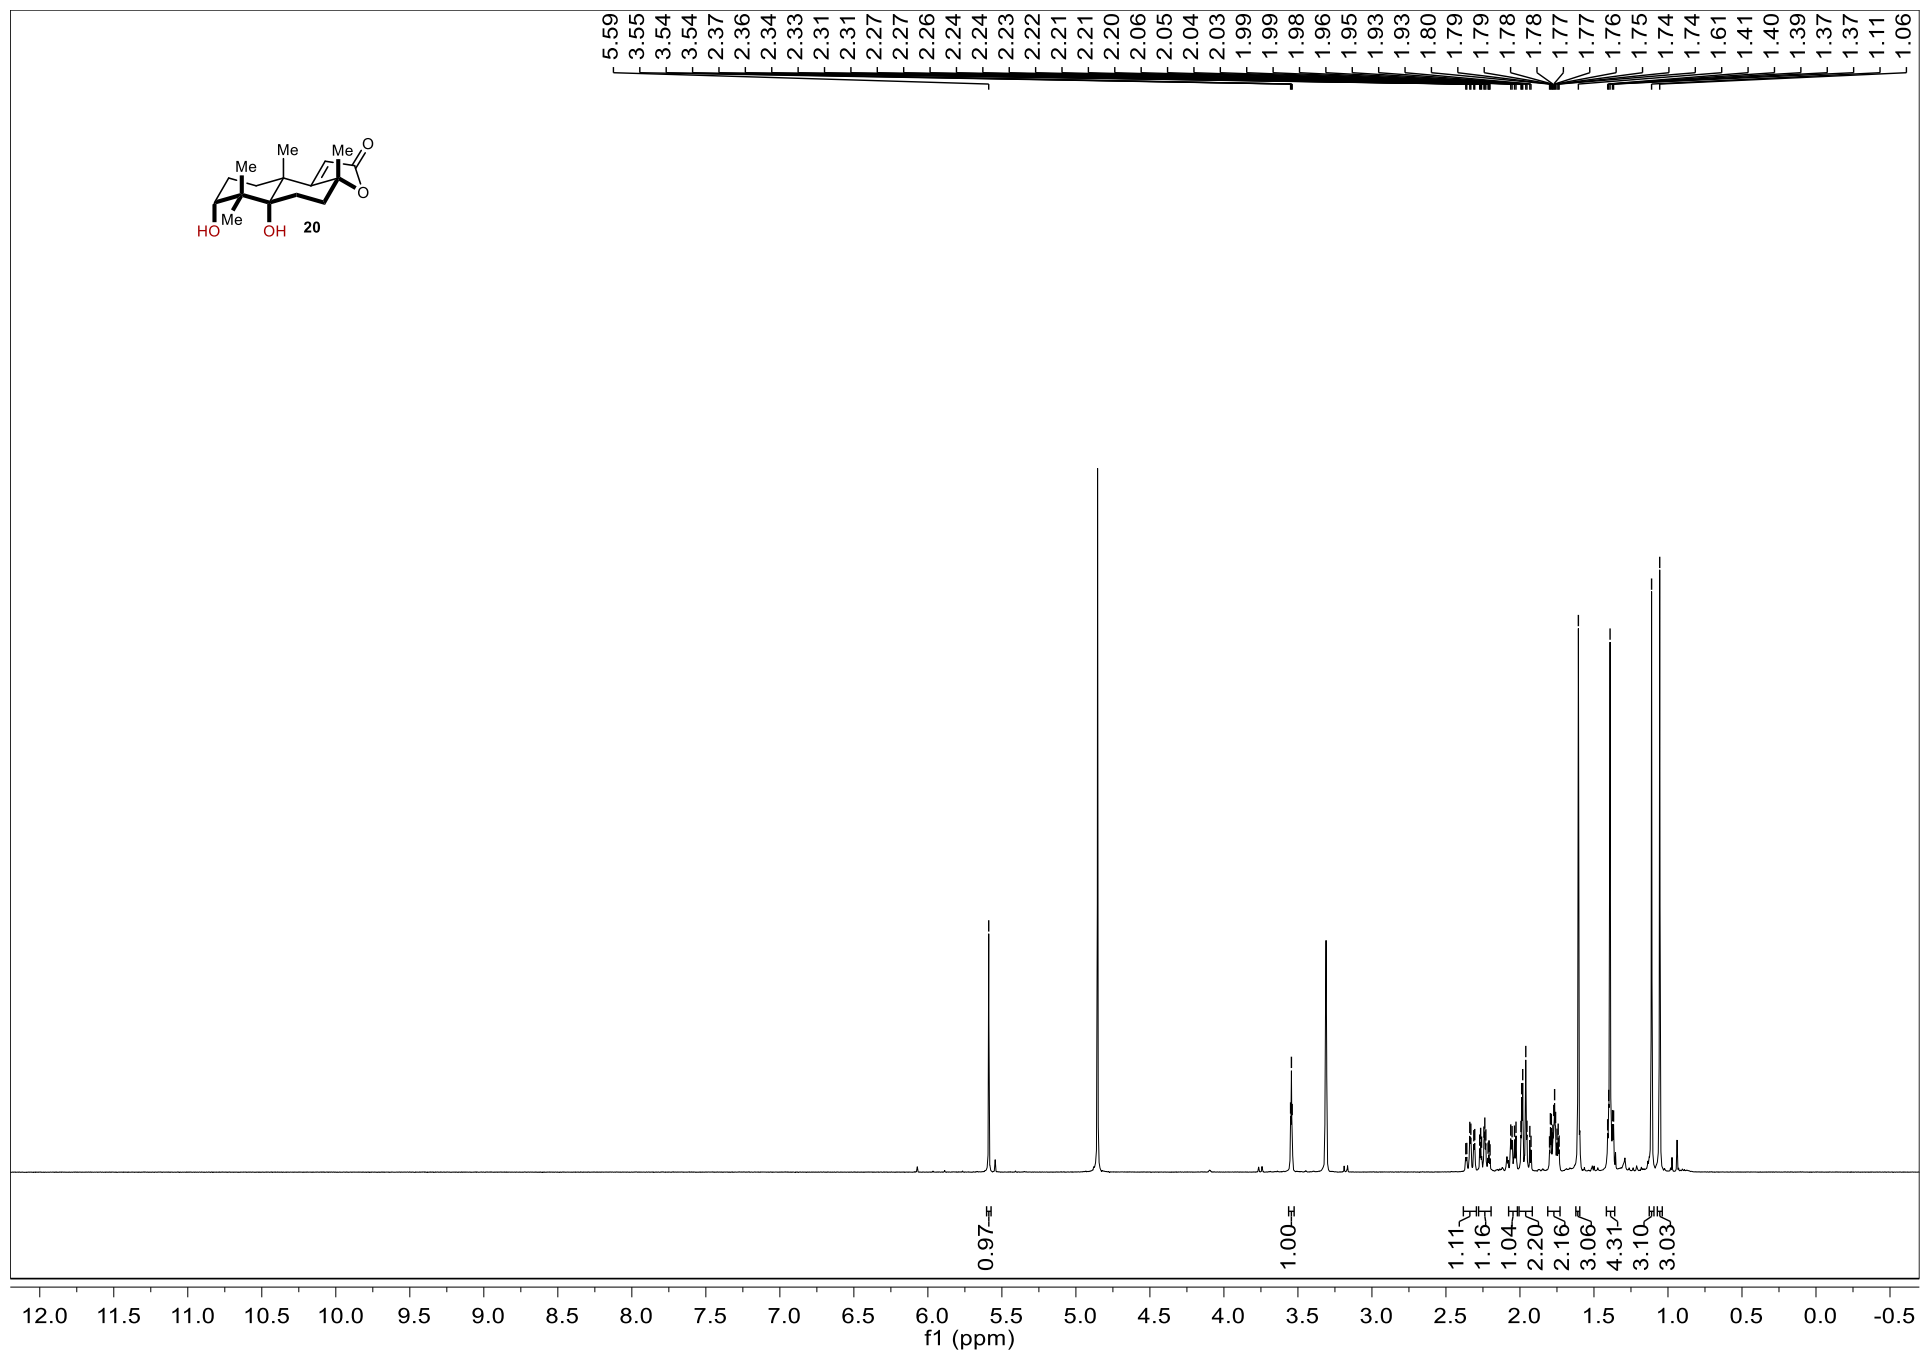

**$^{13}\text{C}$  NMR Spectrum of compound 20 (126 MHz, Methanol- $d_4$ )**

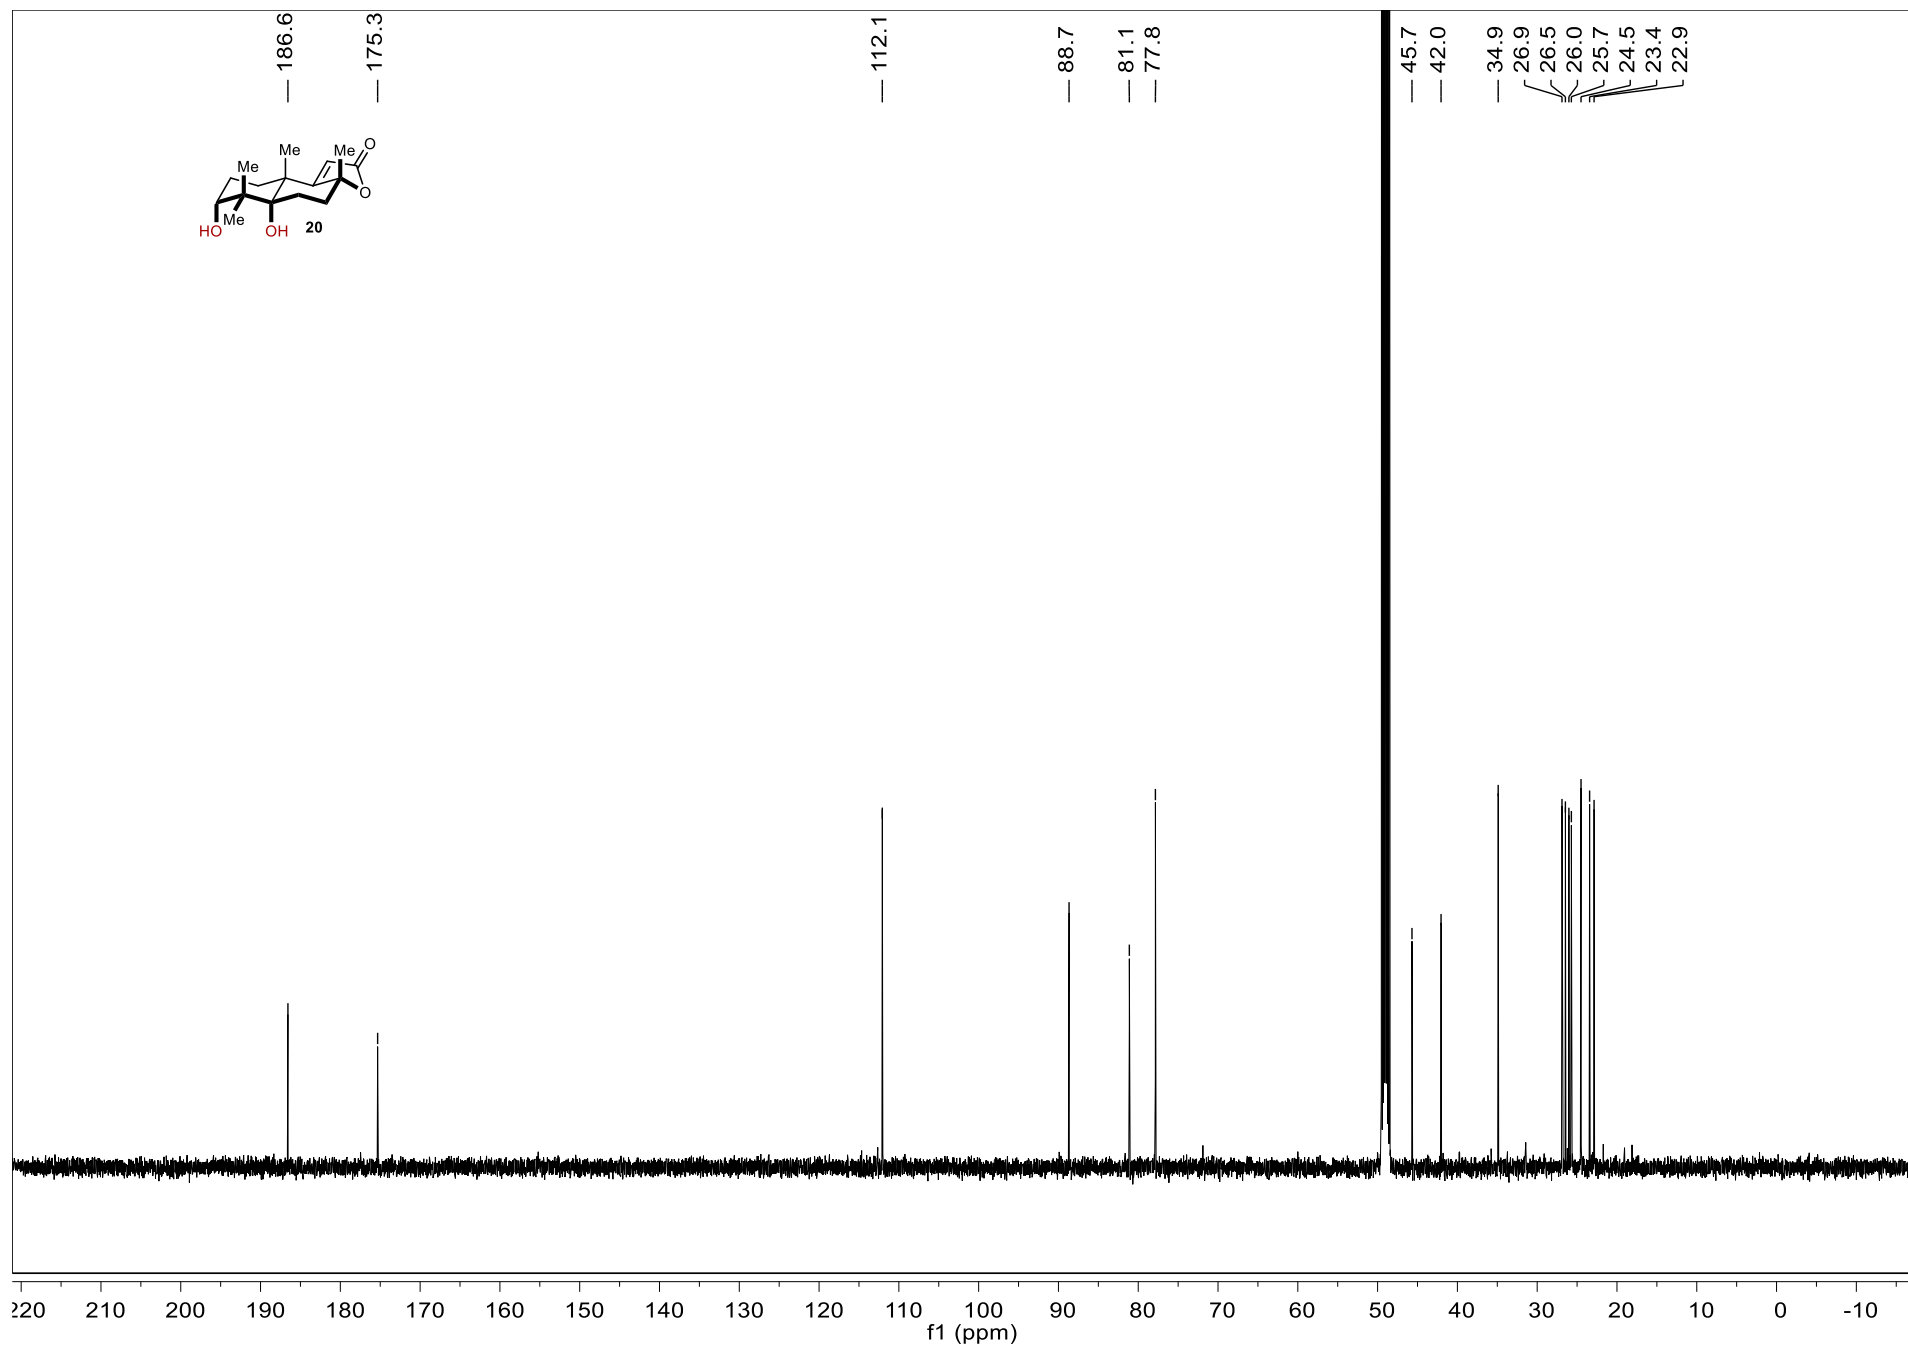



**<sup>1</sup>H NMR Spectrum of compound 21 (500 MHz, Methanol-*d*<sub>4</sub>)**

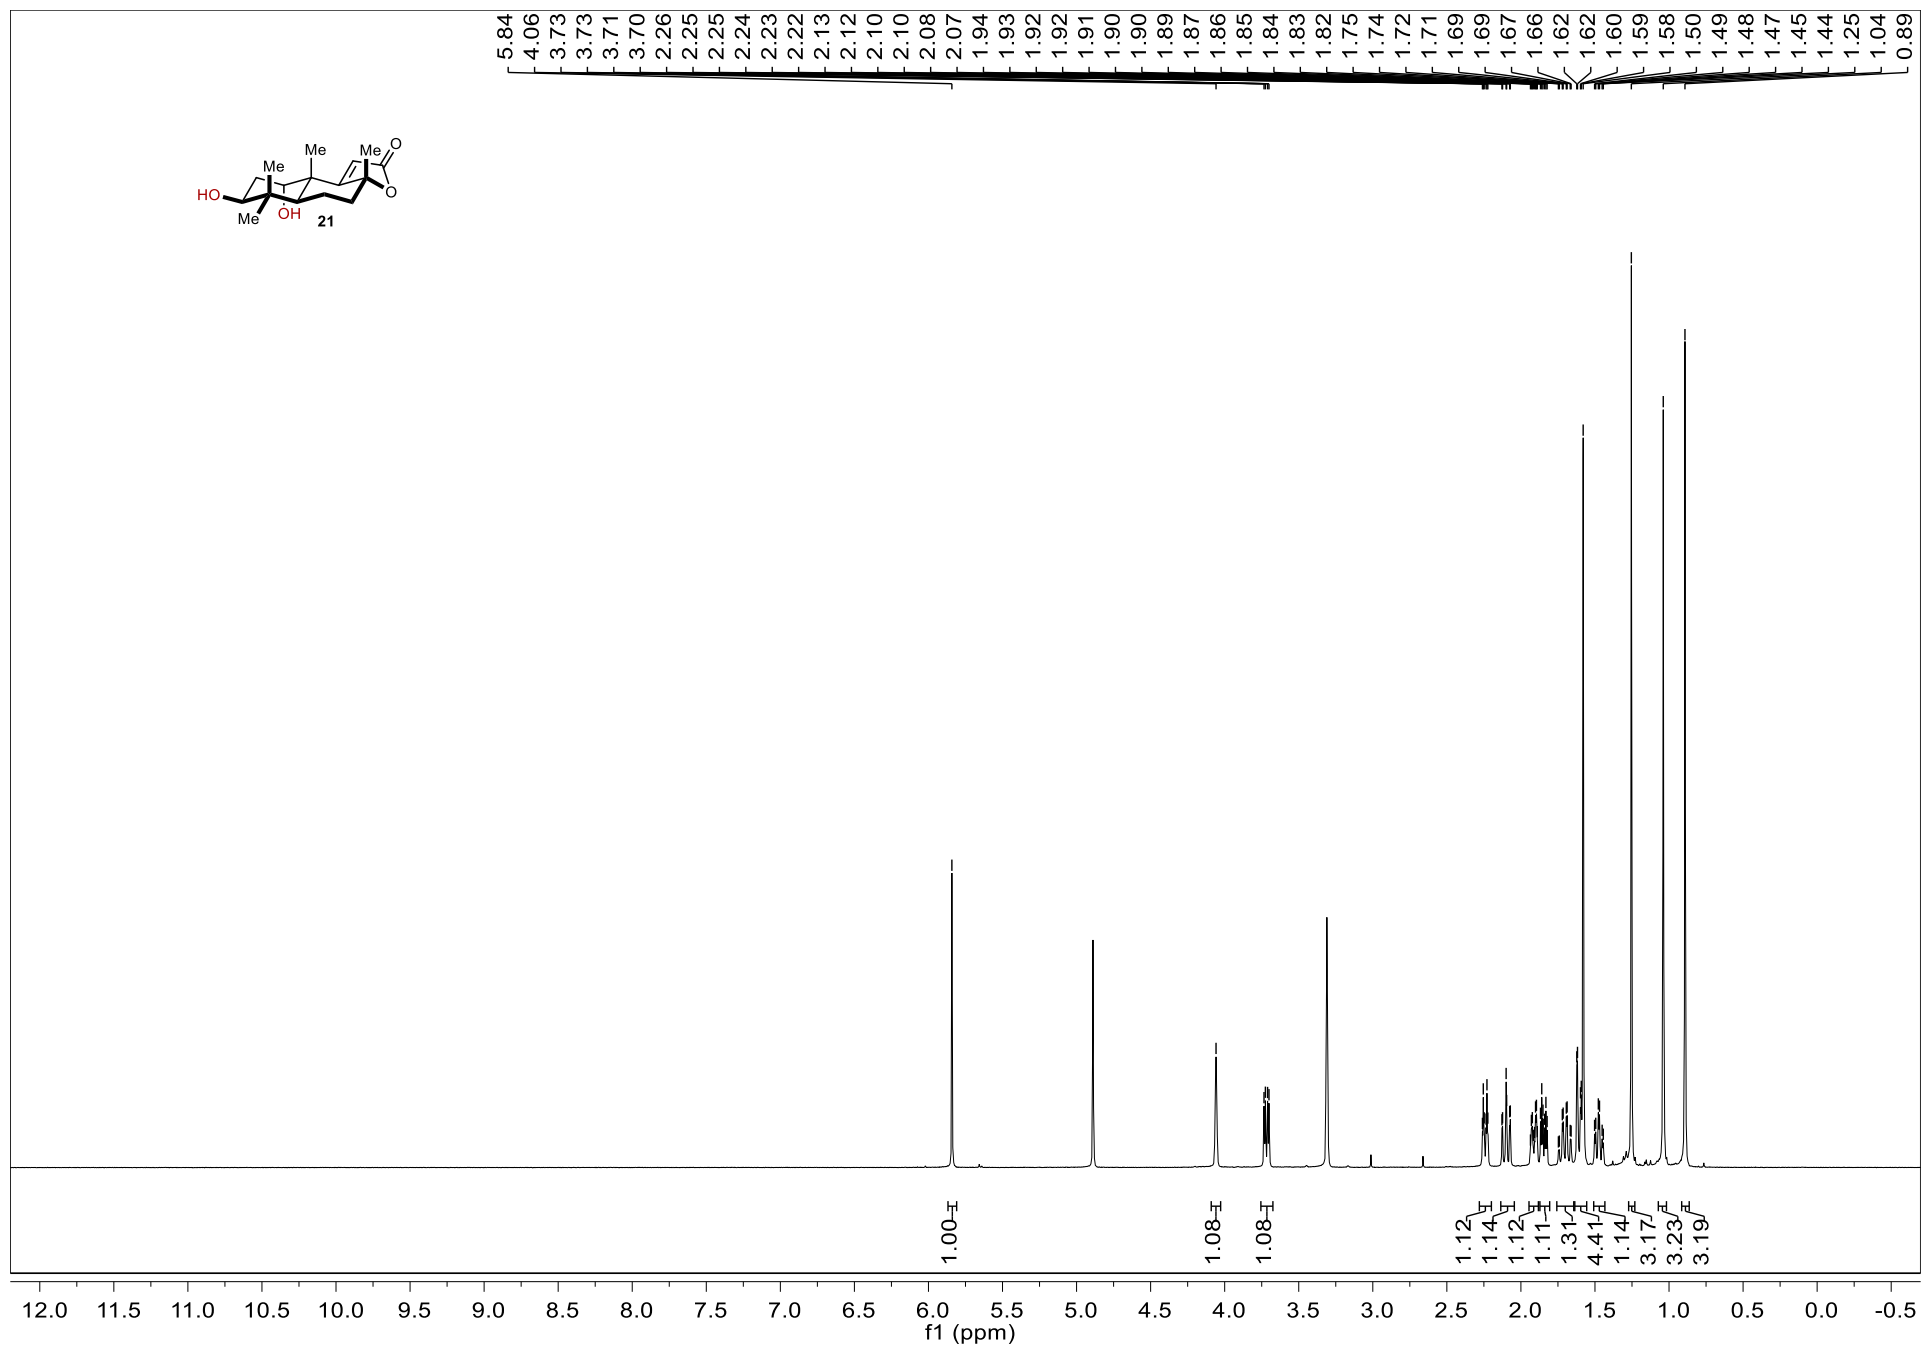

**$^{13}\text{C}$  NMR Spectrum of compound 21 (126 MHz, Methanol- $d_4$ )**

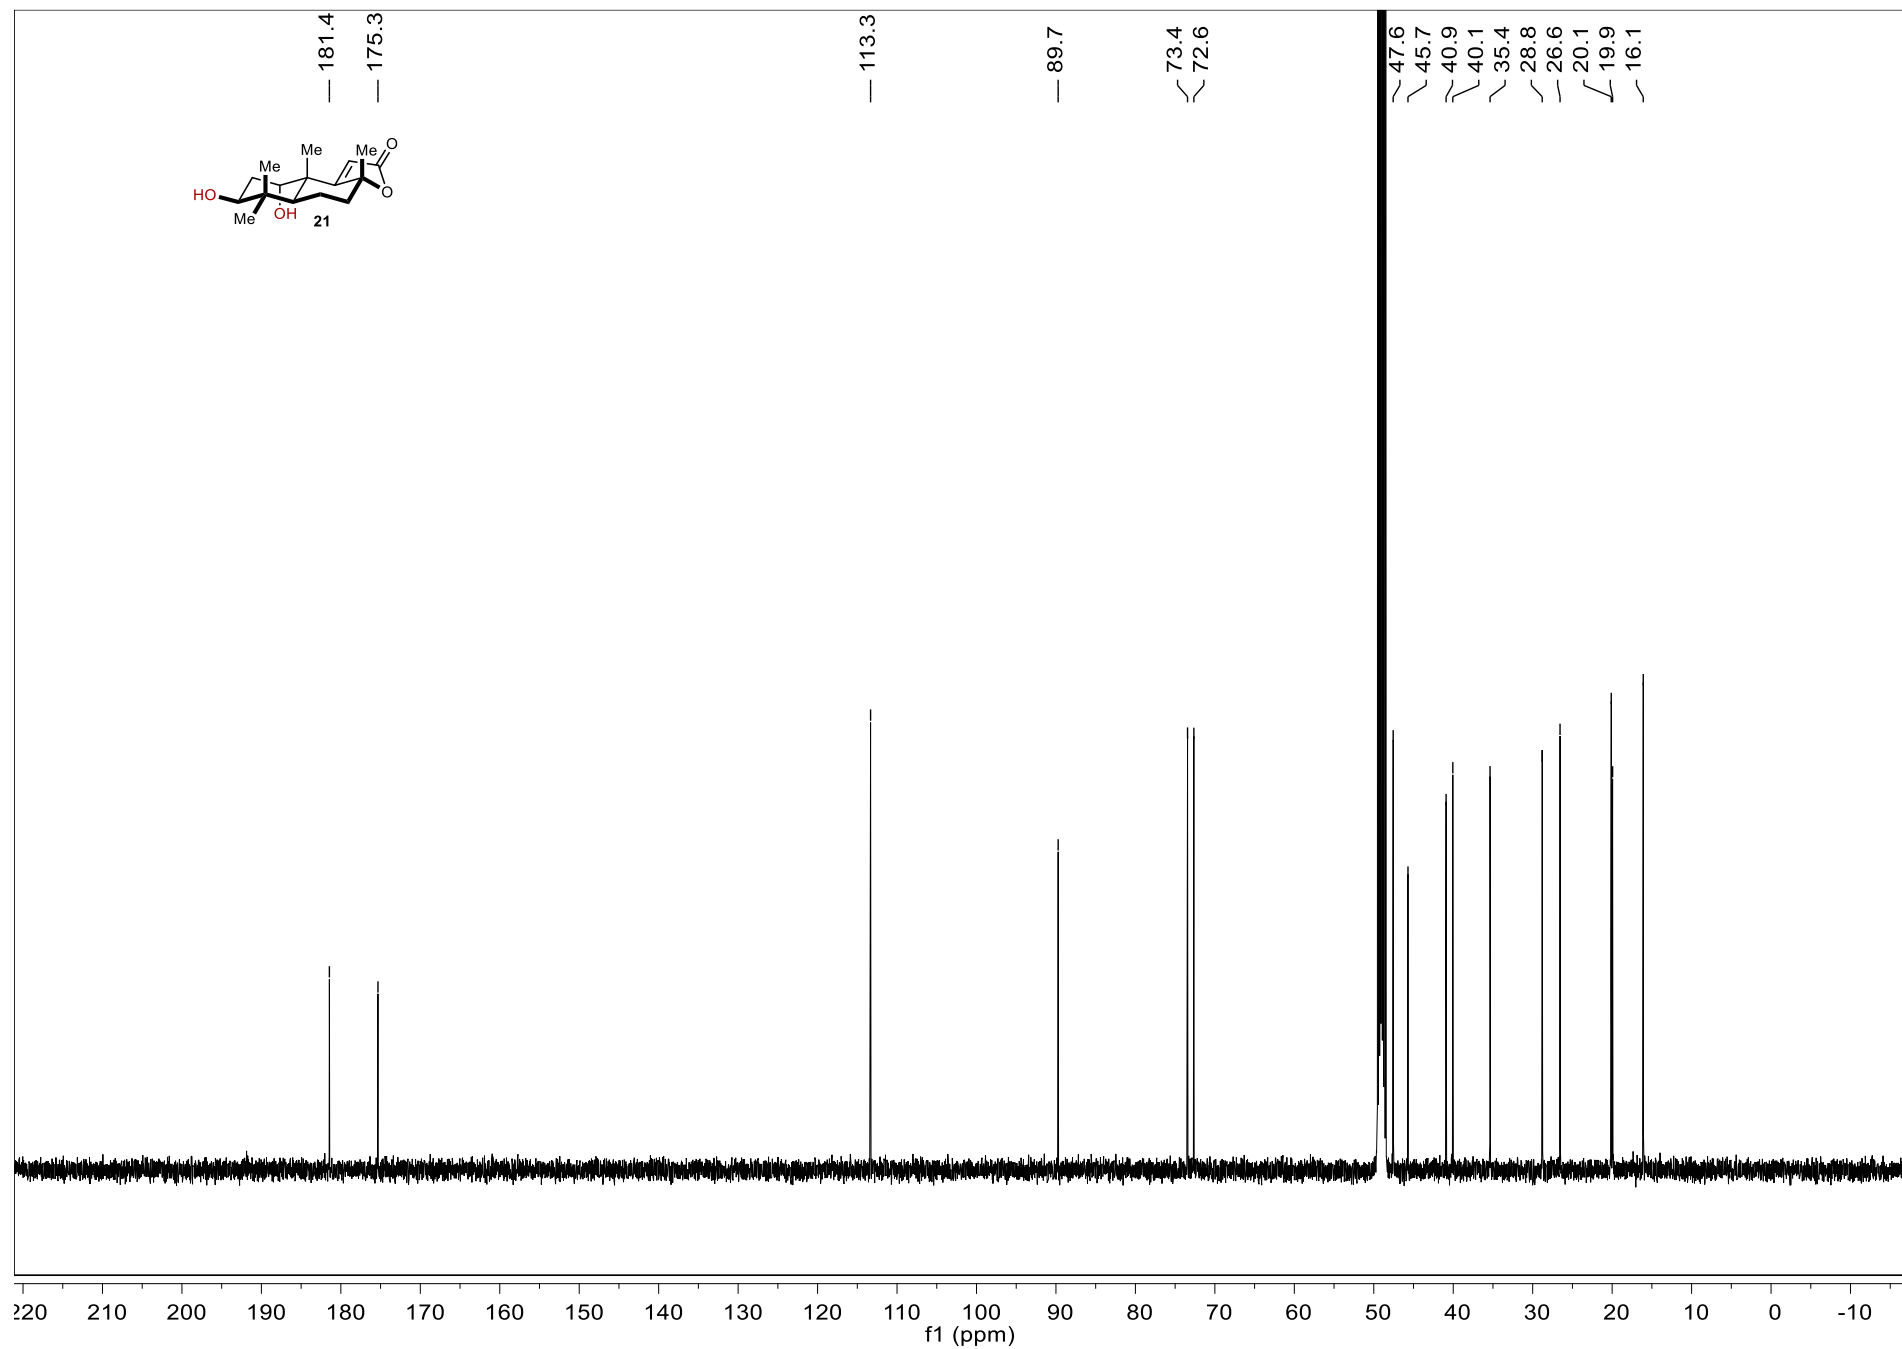

**<sup>1</sup>H NMR Spectrum of compound 22 (500 MHz, Methanol-*d*<sub>4</sub>)**

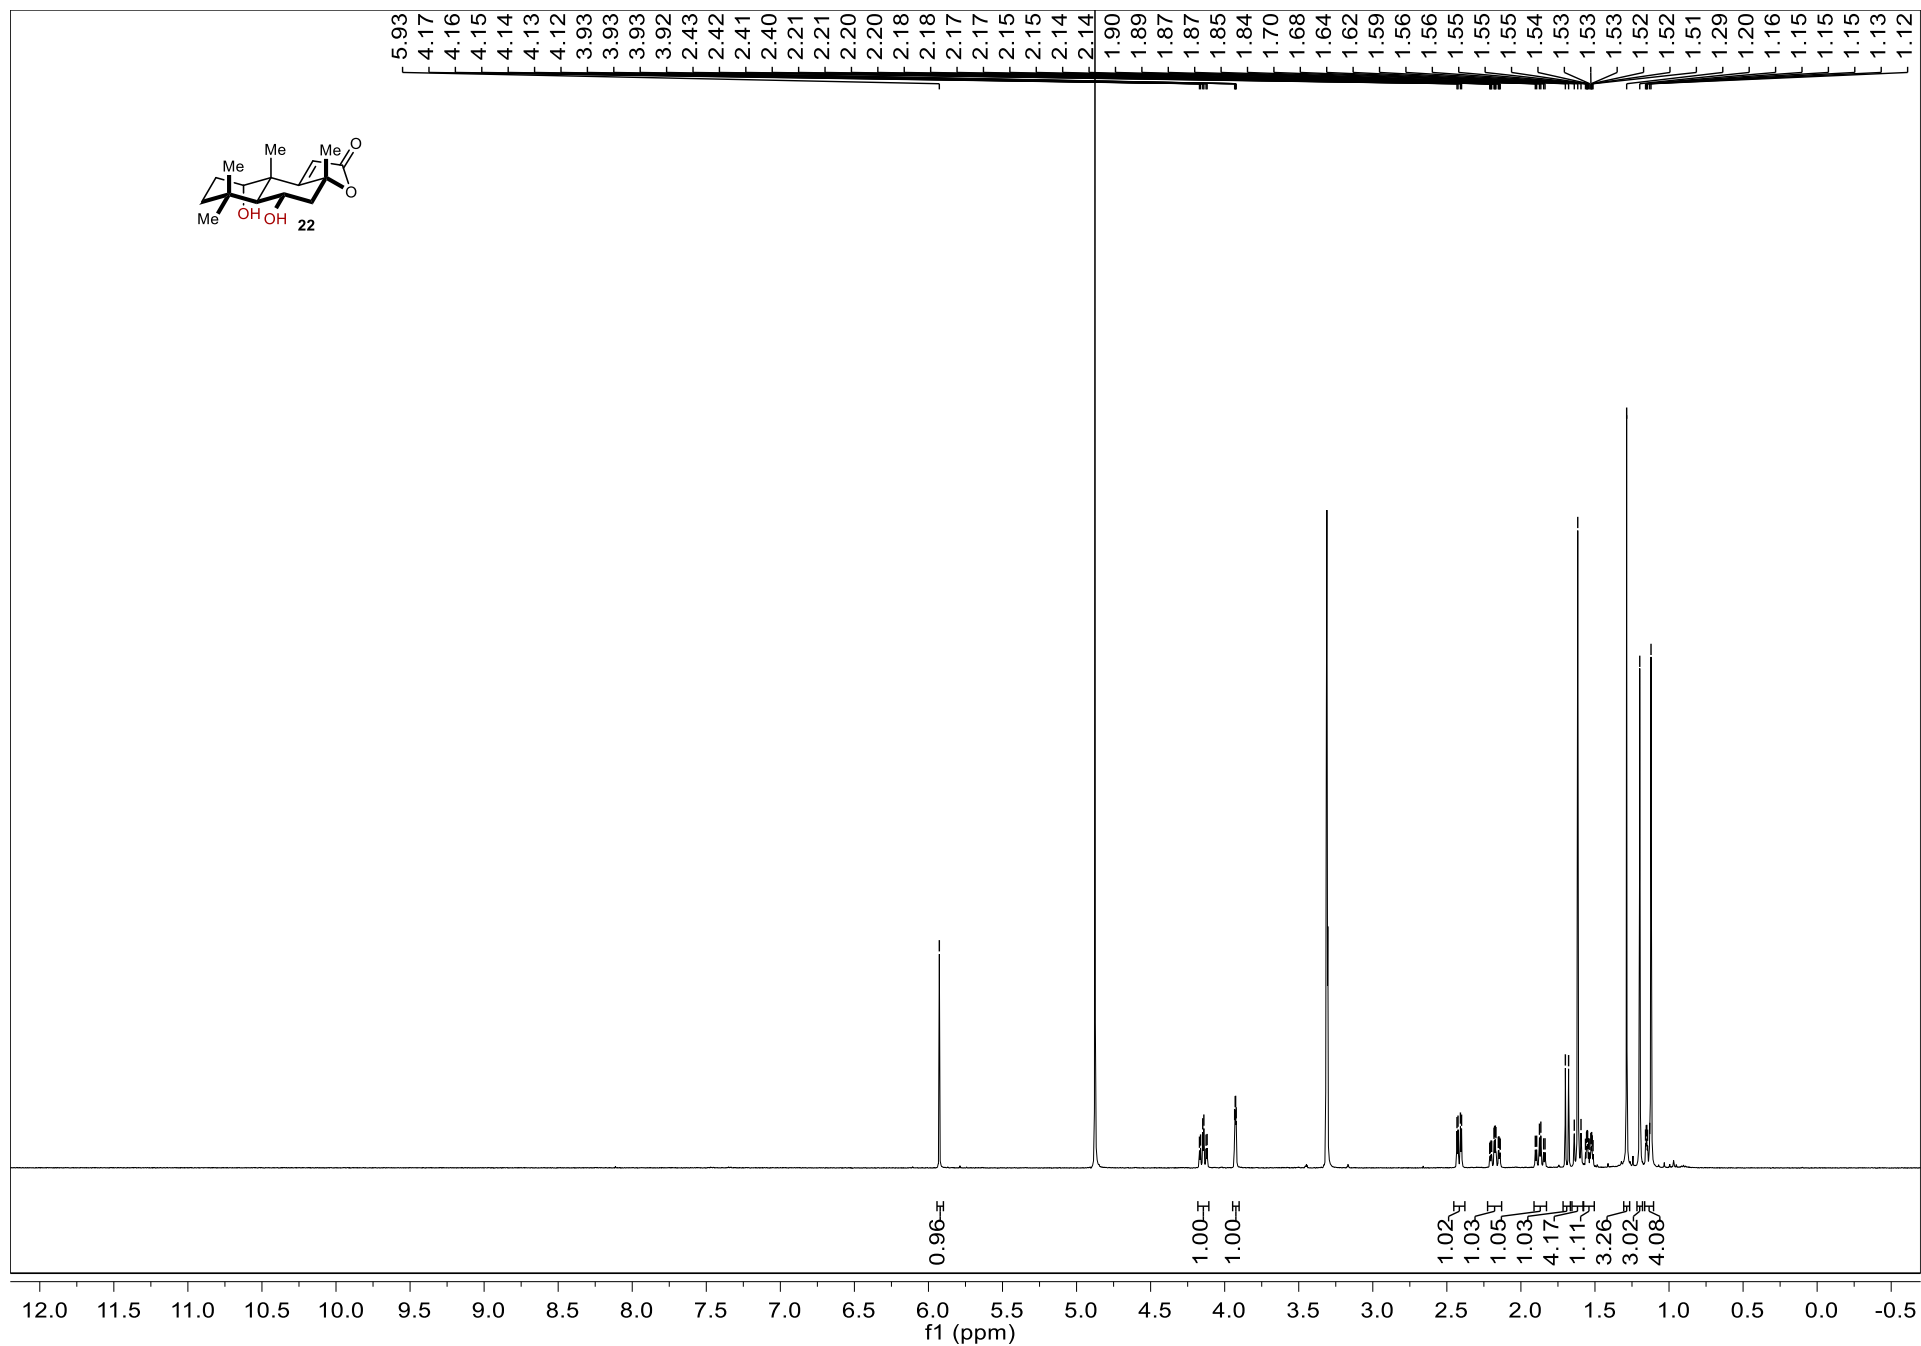

**$^{13}\text{C}$  NMR Spectrum of compound 22 (126 MHz, Methanol- $d_4$ )**

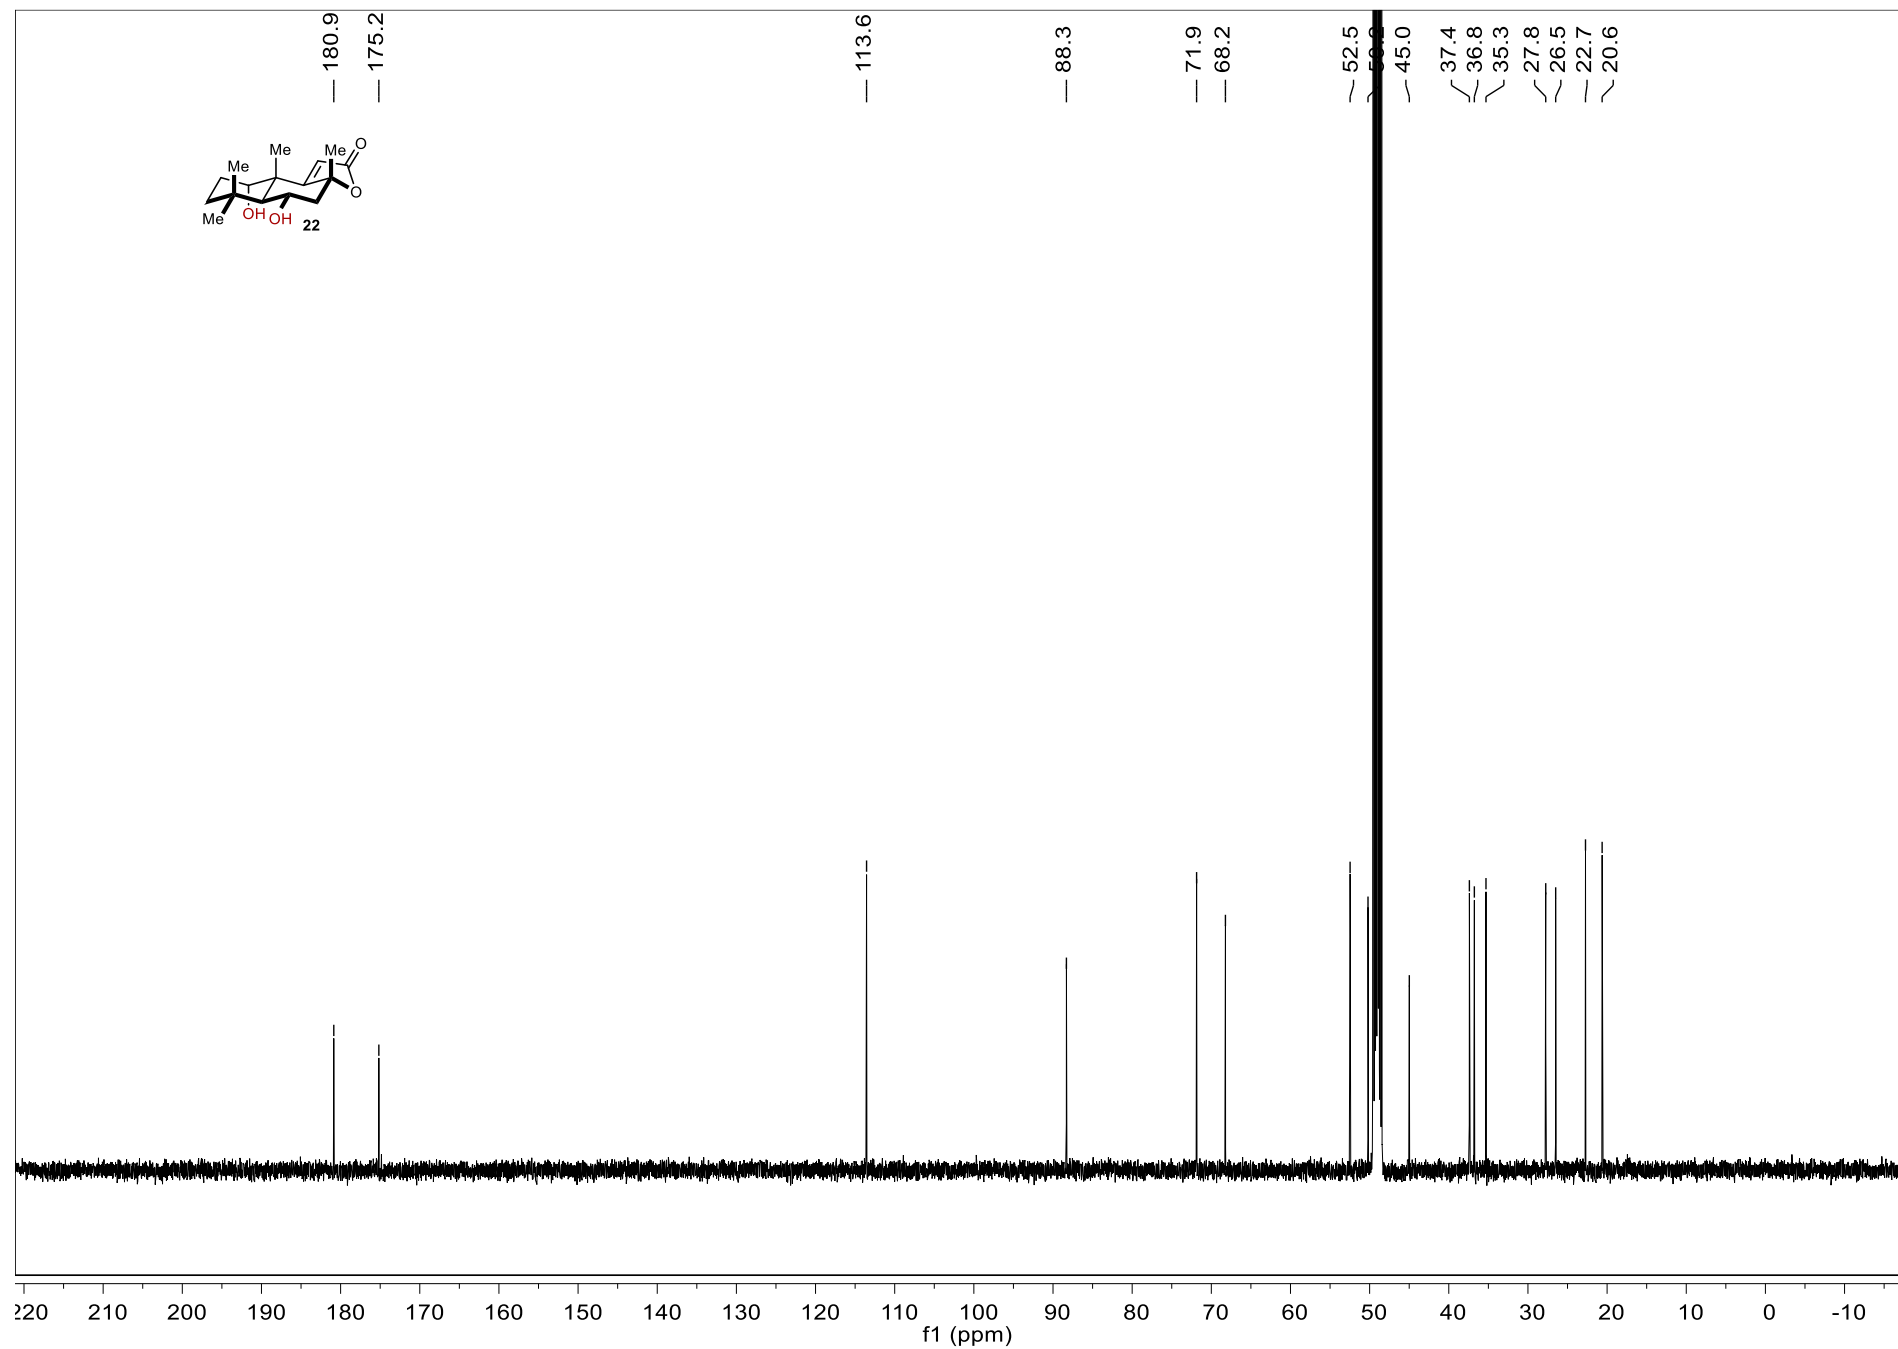

**$^1\text{H}$  NMR Spectrum of compound 23 (500 MHz, Methanol- $d_4$ )**

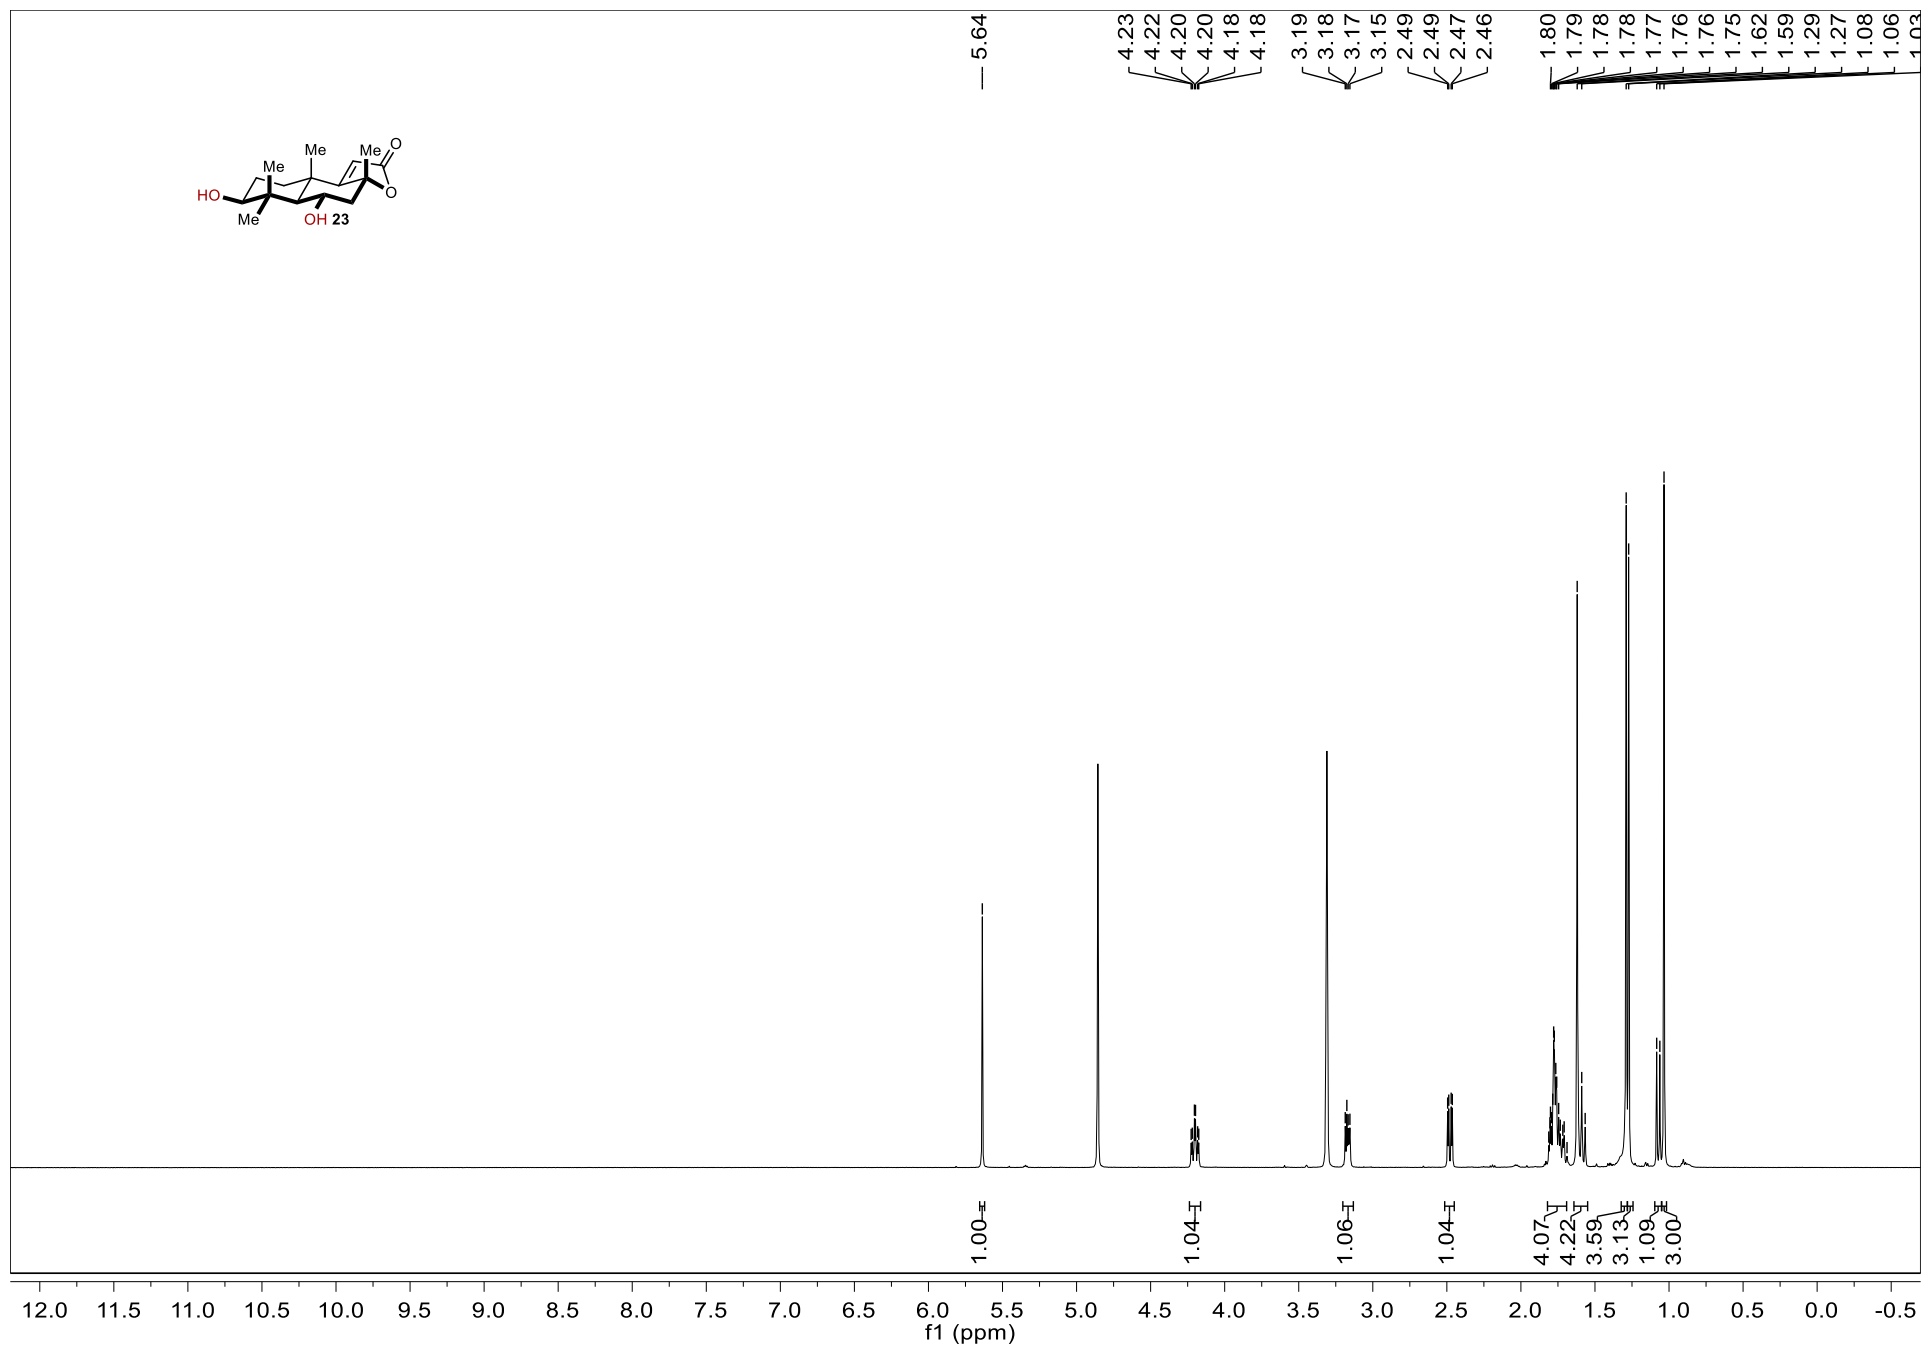

**$^{13}\text{C}$  NMR Spectrum of compound 23 (126 MHz, Methanol- $d_4$ )**

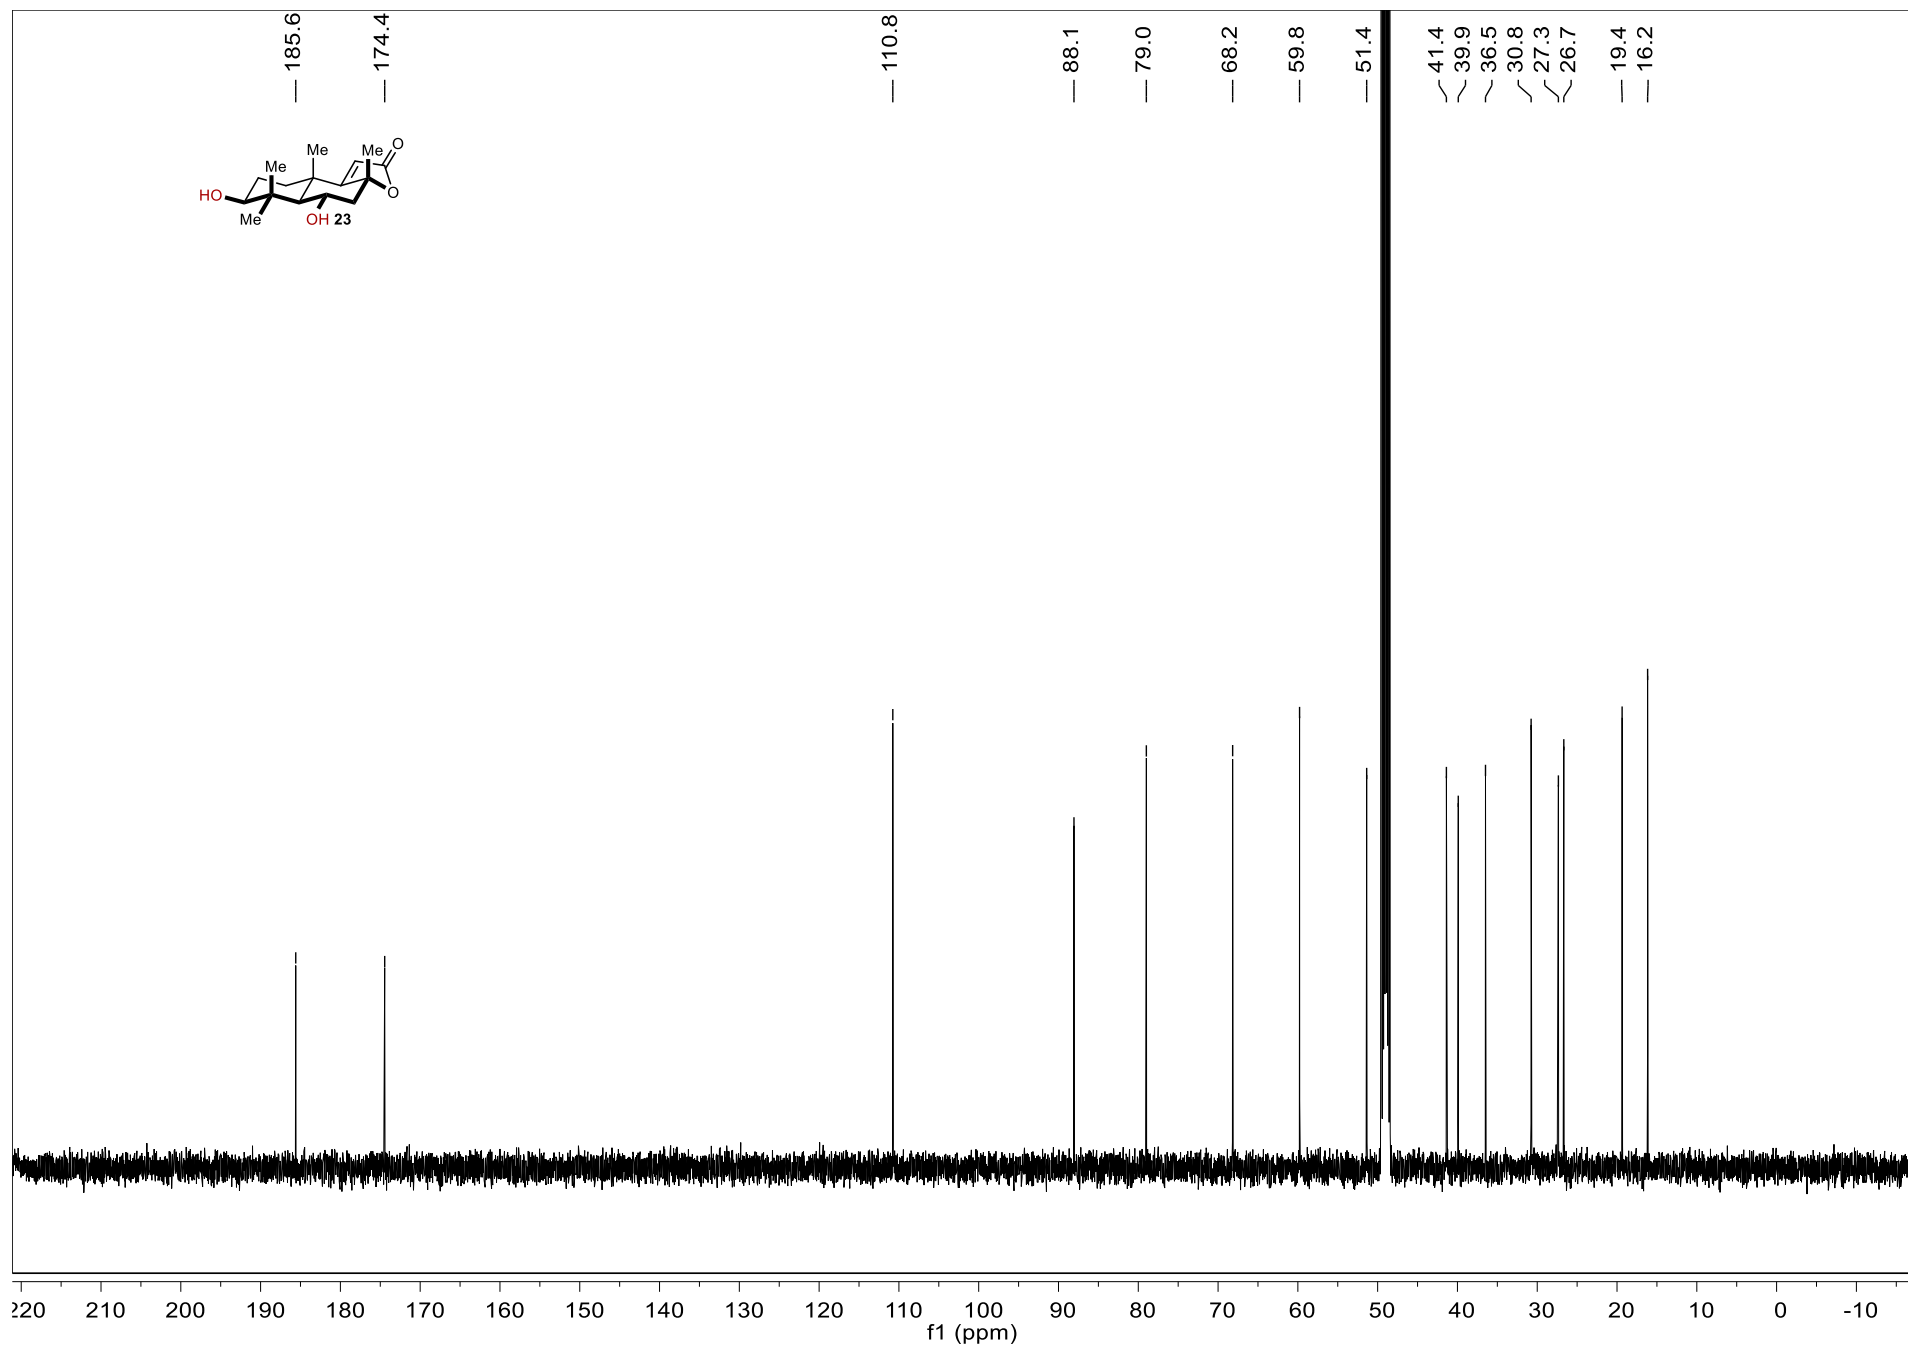

**$^1\text{H}$  NMR Spectrum of compound 24 (500 MHz, Acetone- $d_6$ )**

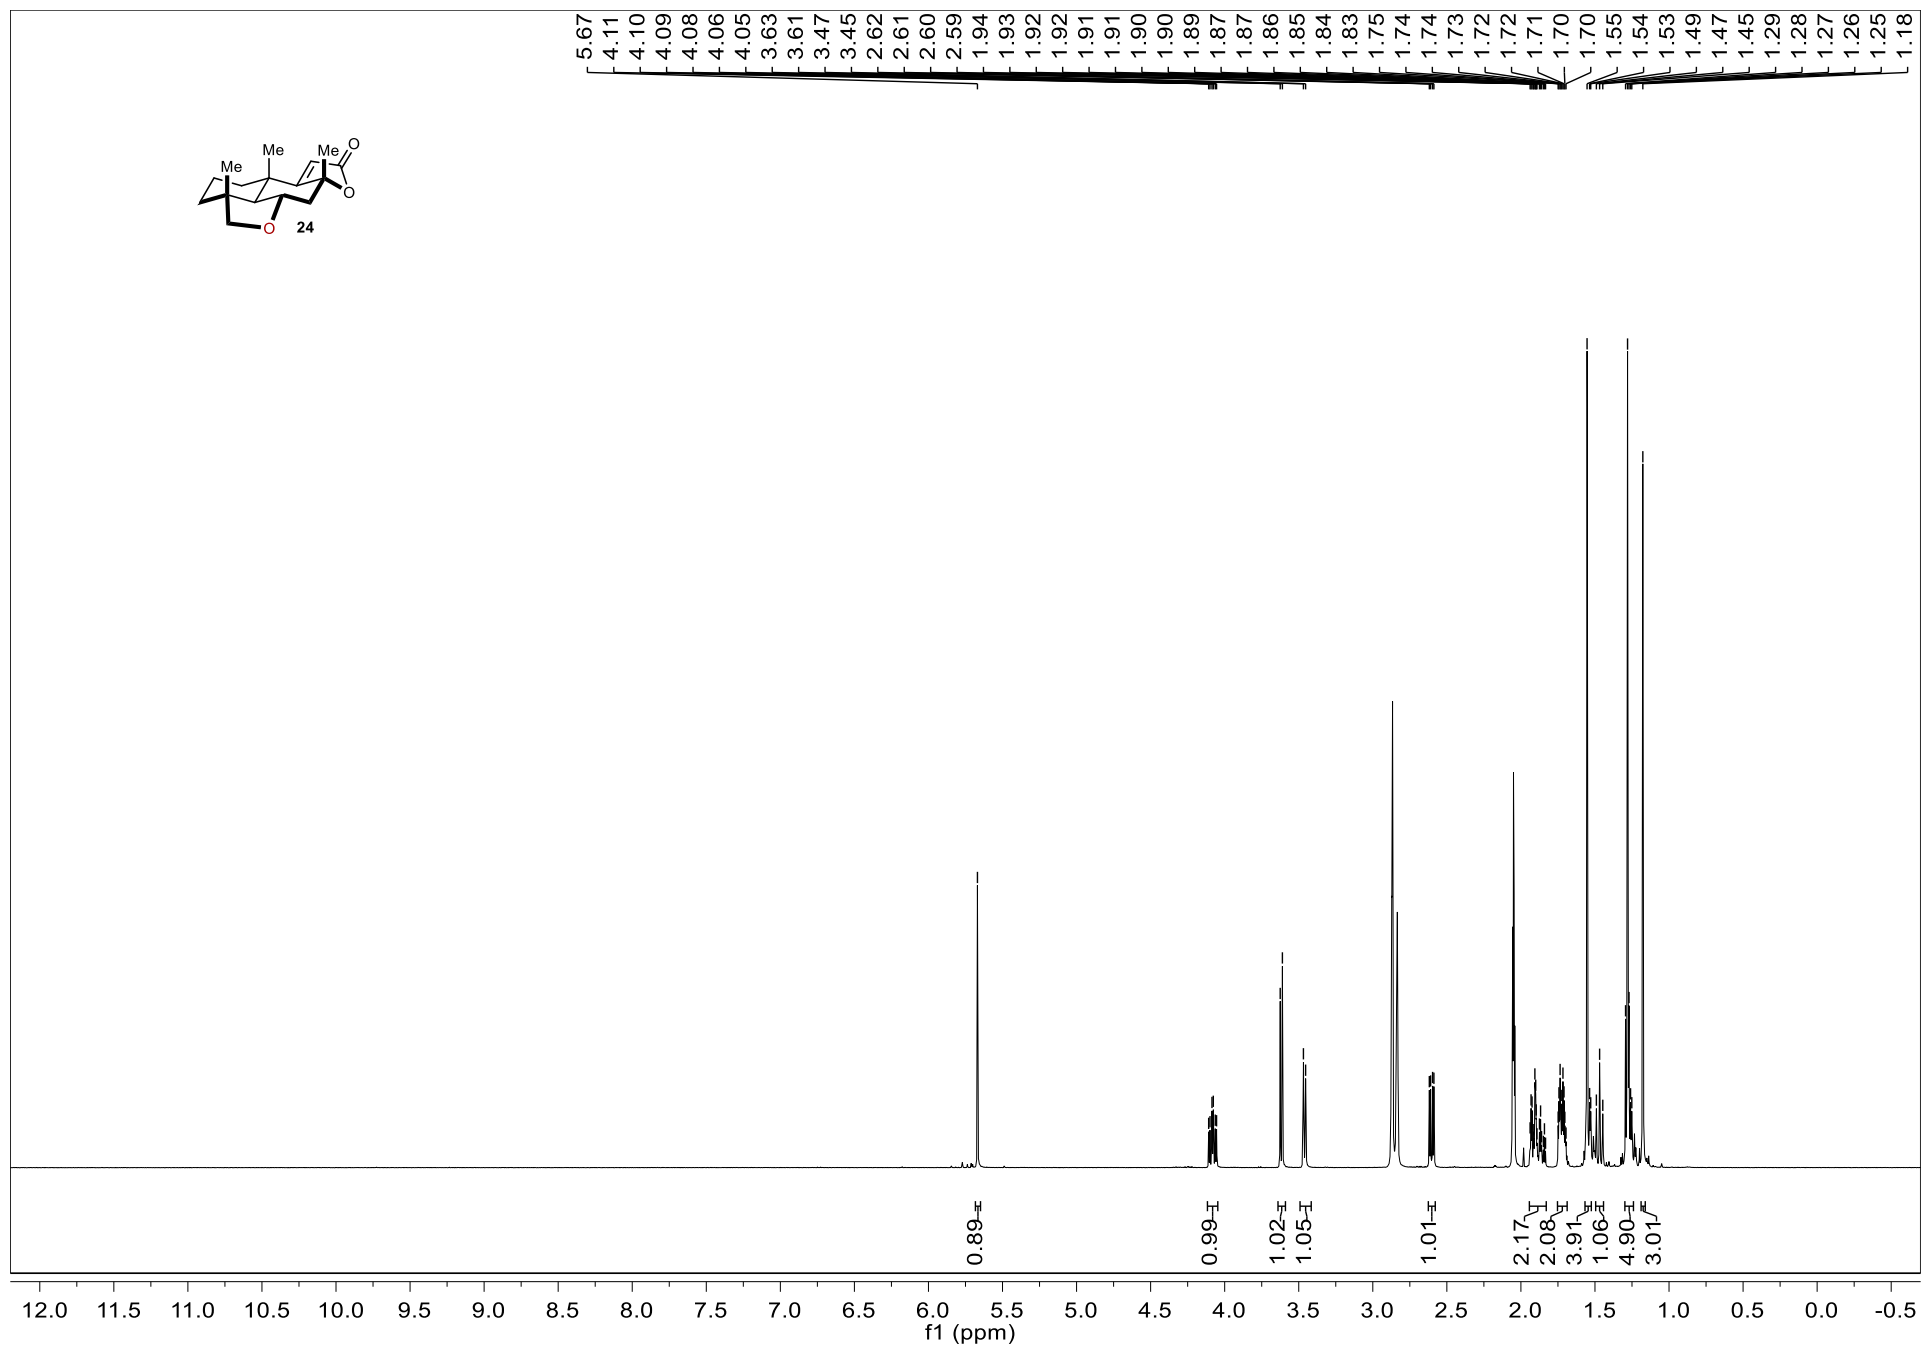

**$^{13}\text{C}$  NMR Spectrum of compound 24 (126 MHz, Acetone- $d_6$ )**

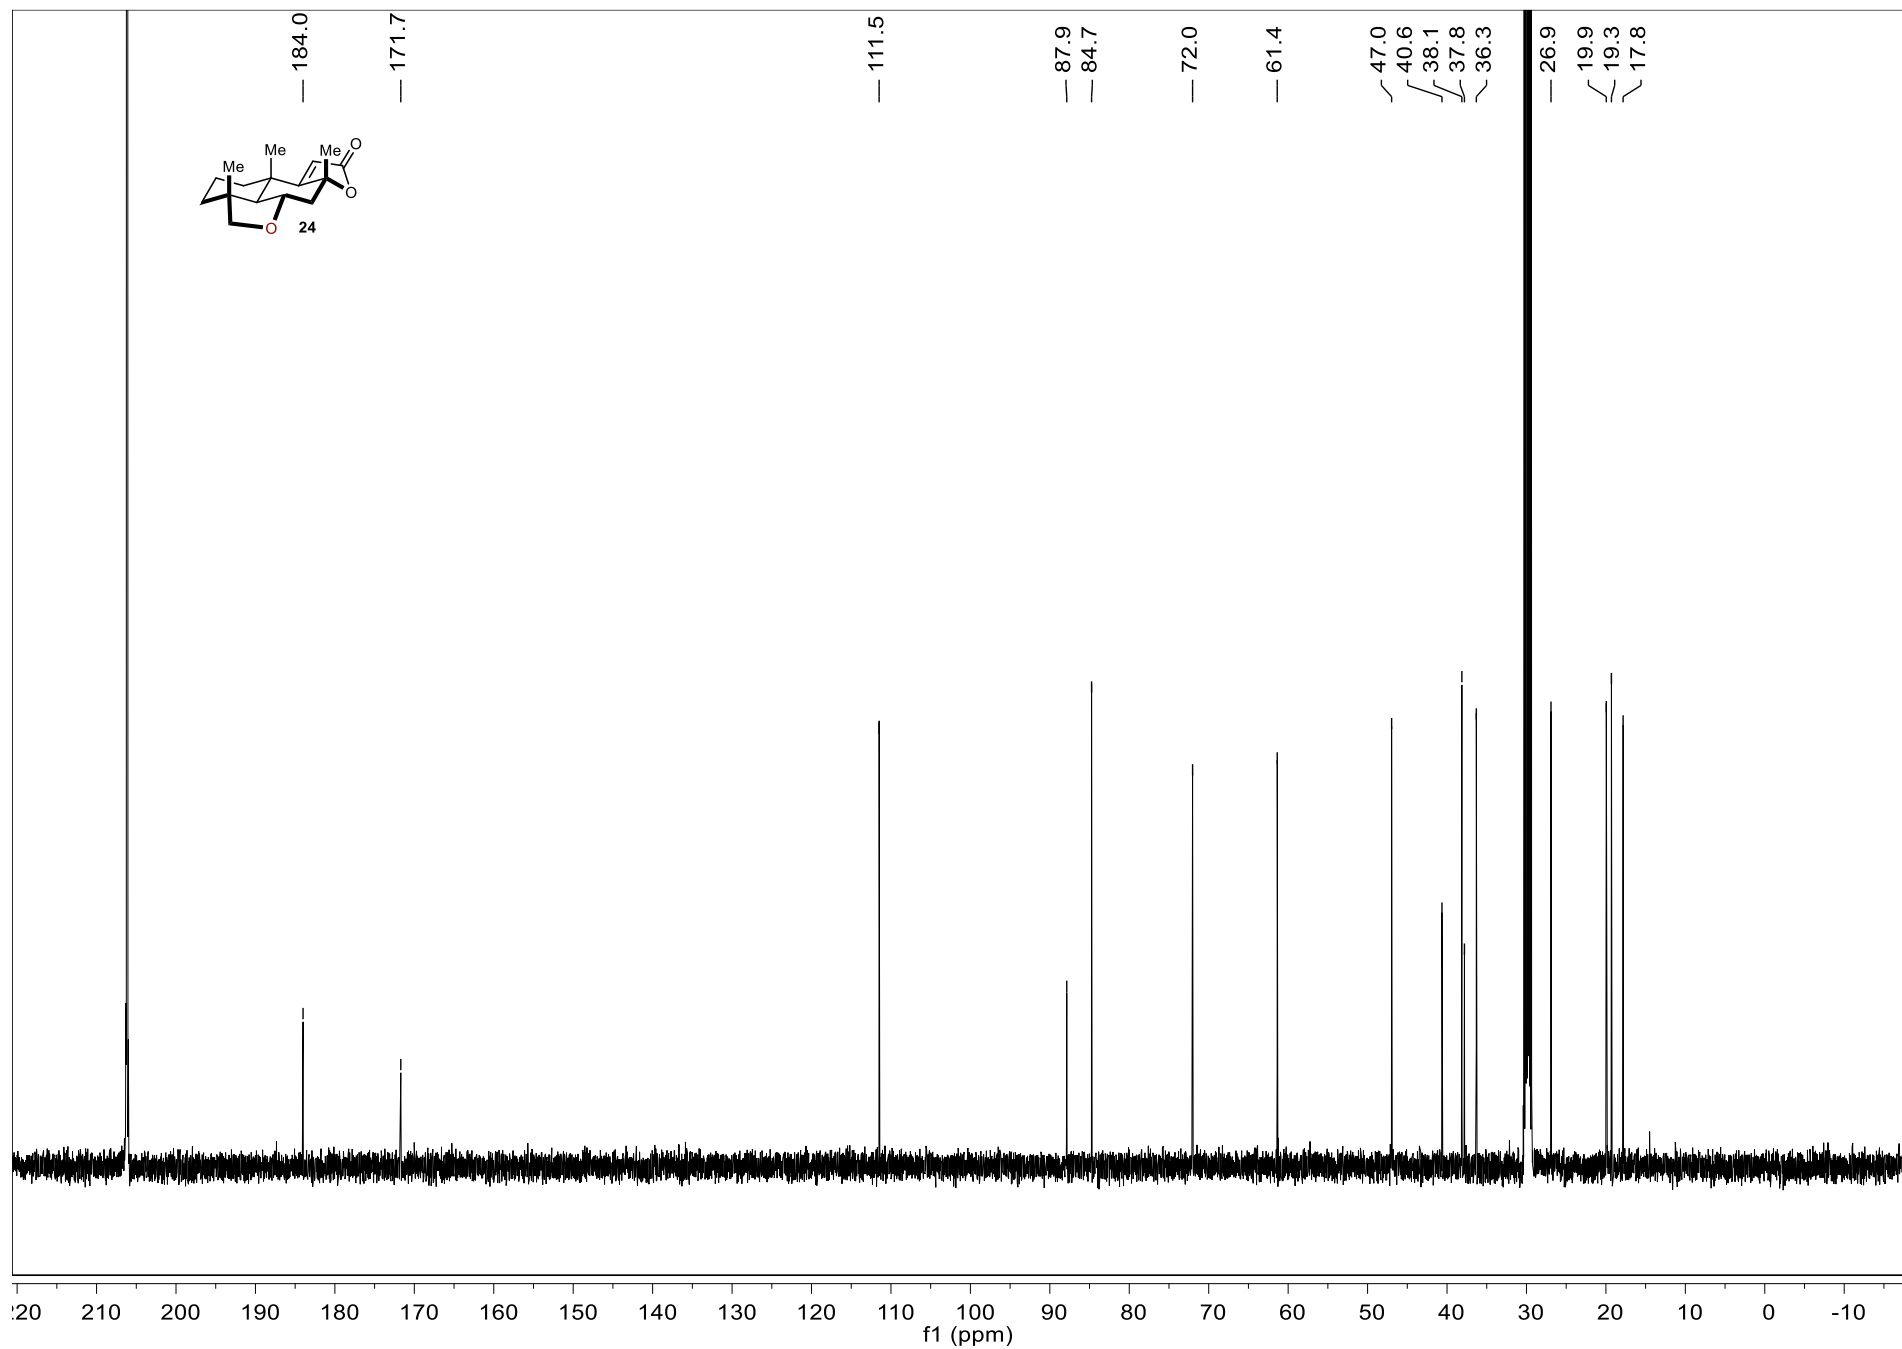



<sup>1</sup>H NMR Spectrum of compound S1 (500 MHz, CDCl<sub>3</sub>)

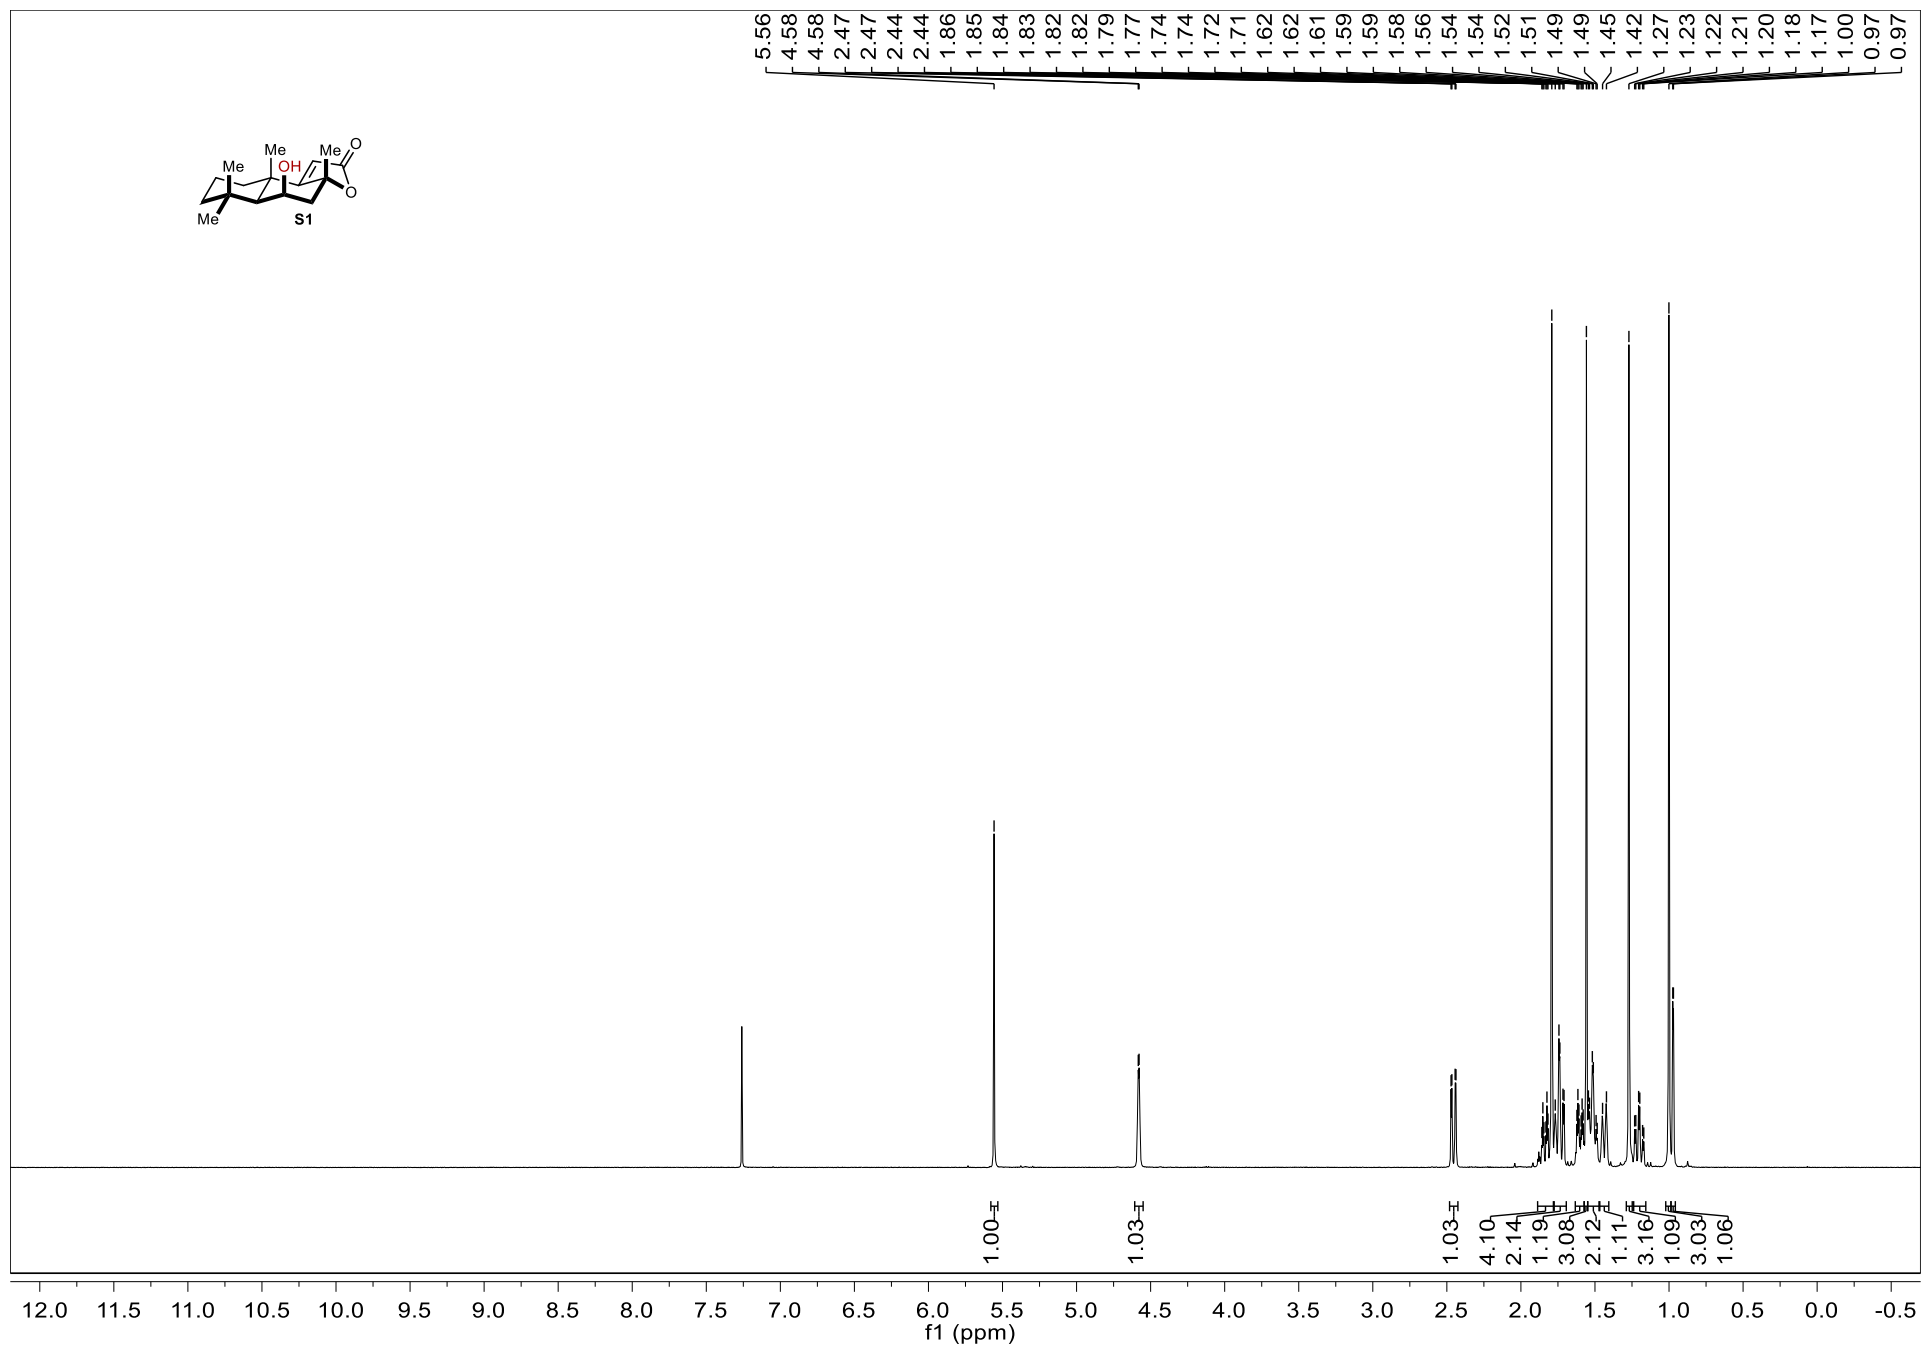

**$^{13}\text{C}$  NMR Spectrum of compound S1 (126 MHz,  $\text{CDCl}_3$ )**

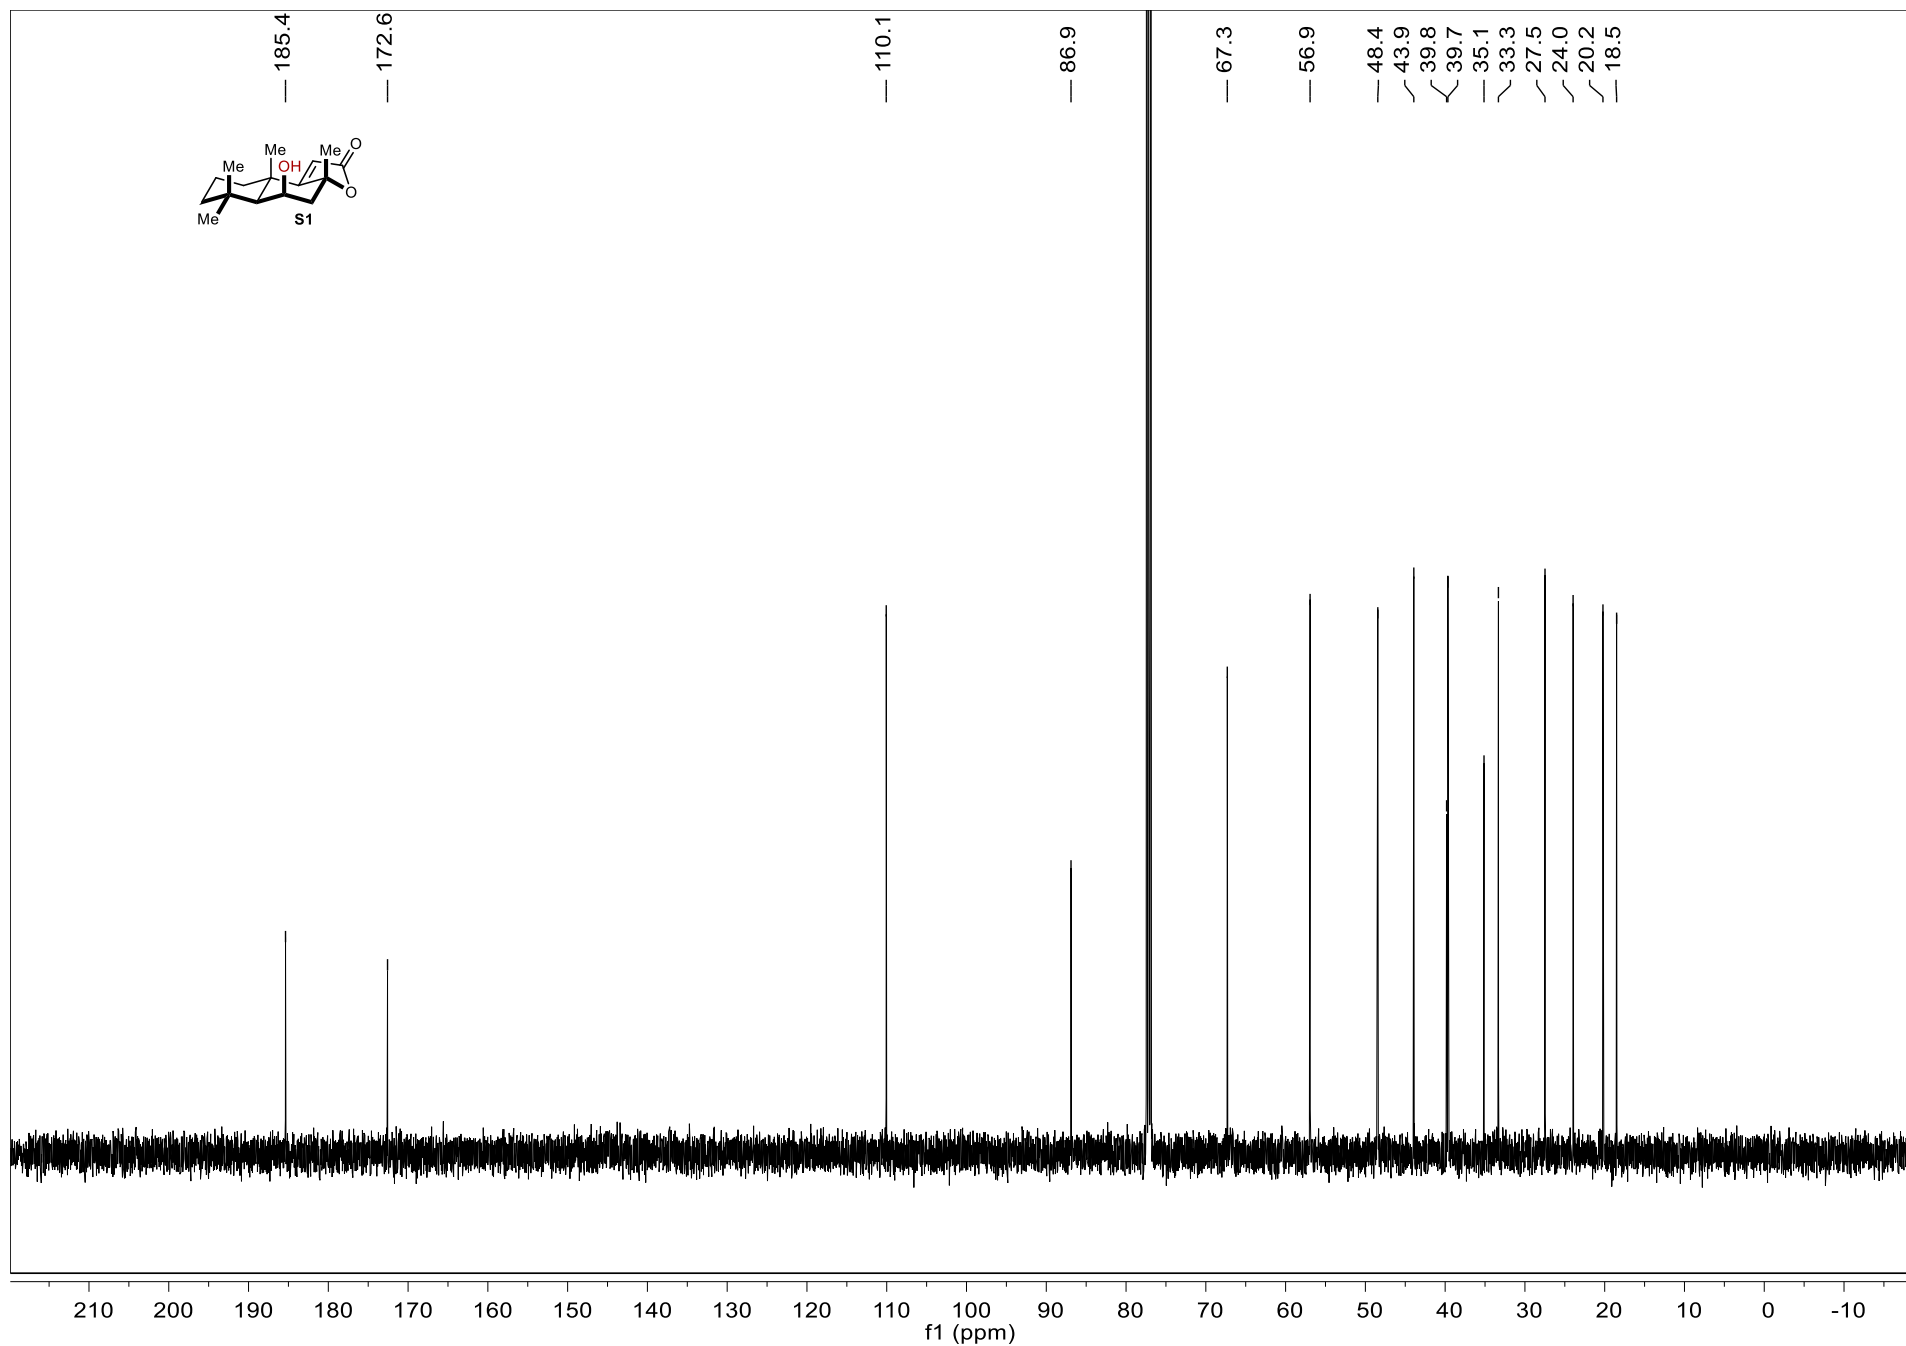

**<sup>1</sup>H NMR Spectrum of compound 25 (500 MHz, CDCl<sub>3</sub>)**

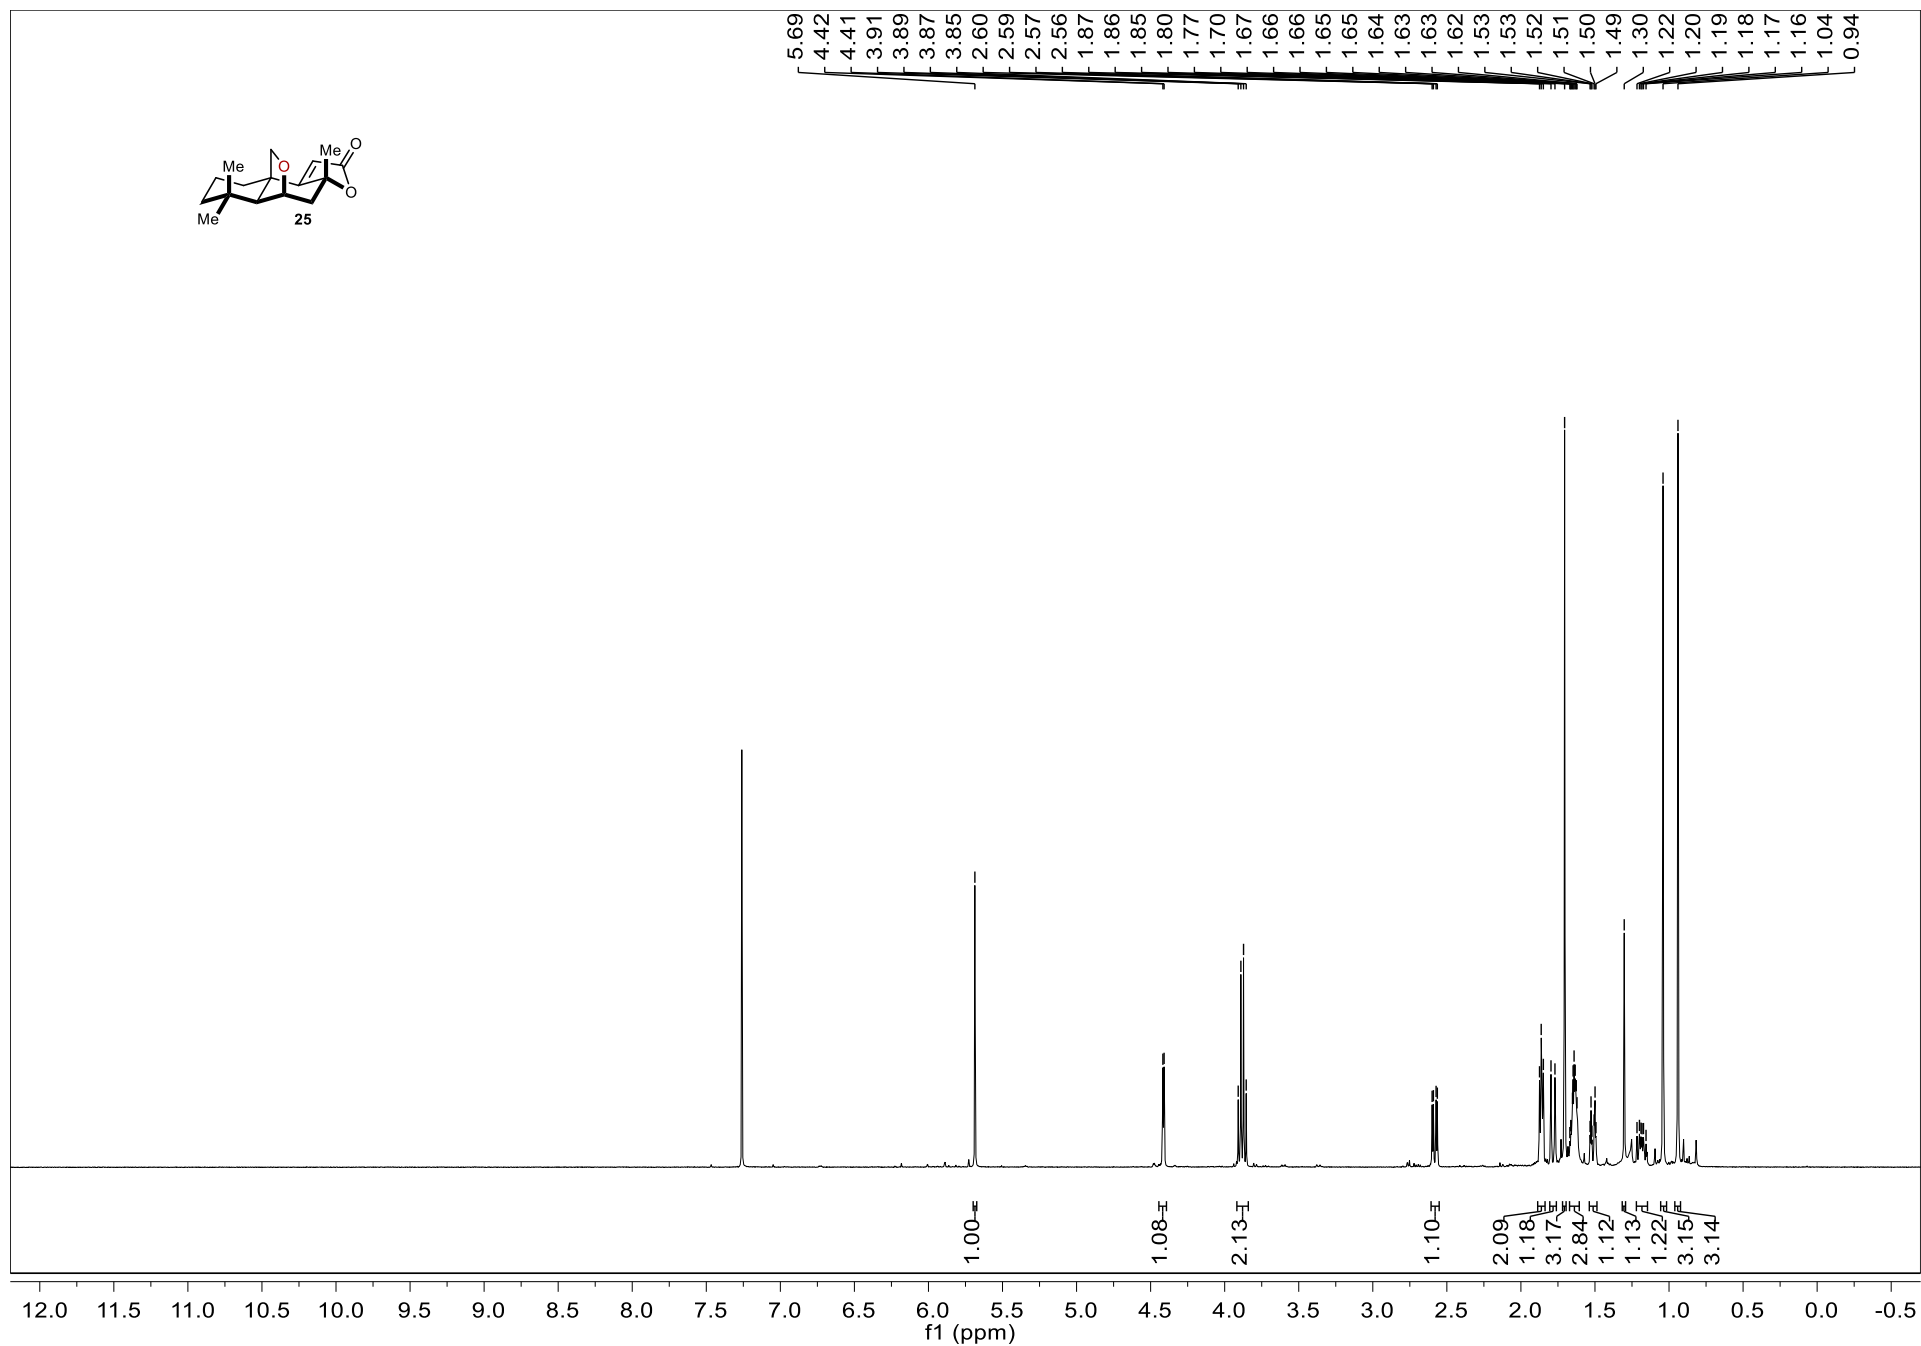

**$^{13}\text{C}$  NMR Spectrum of compound 25 (126 MHz,  $\text{CDCl}_3$ )**

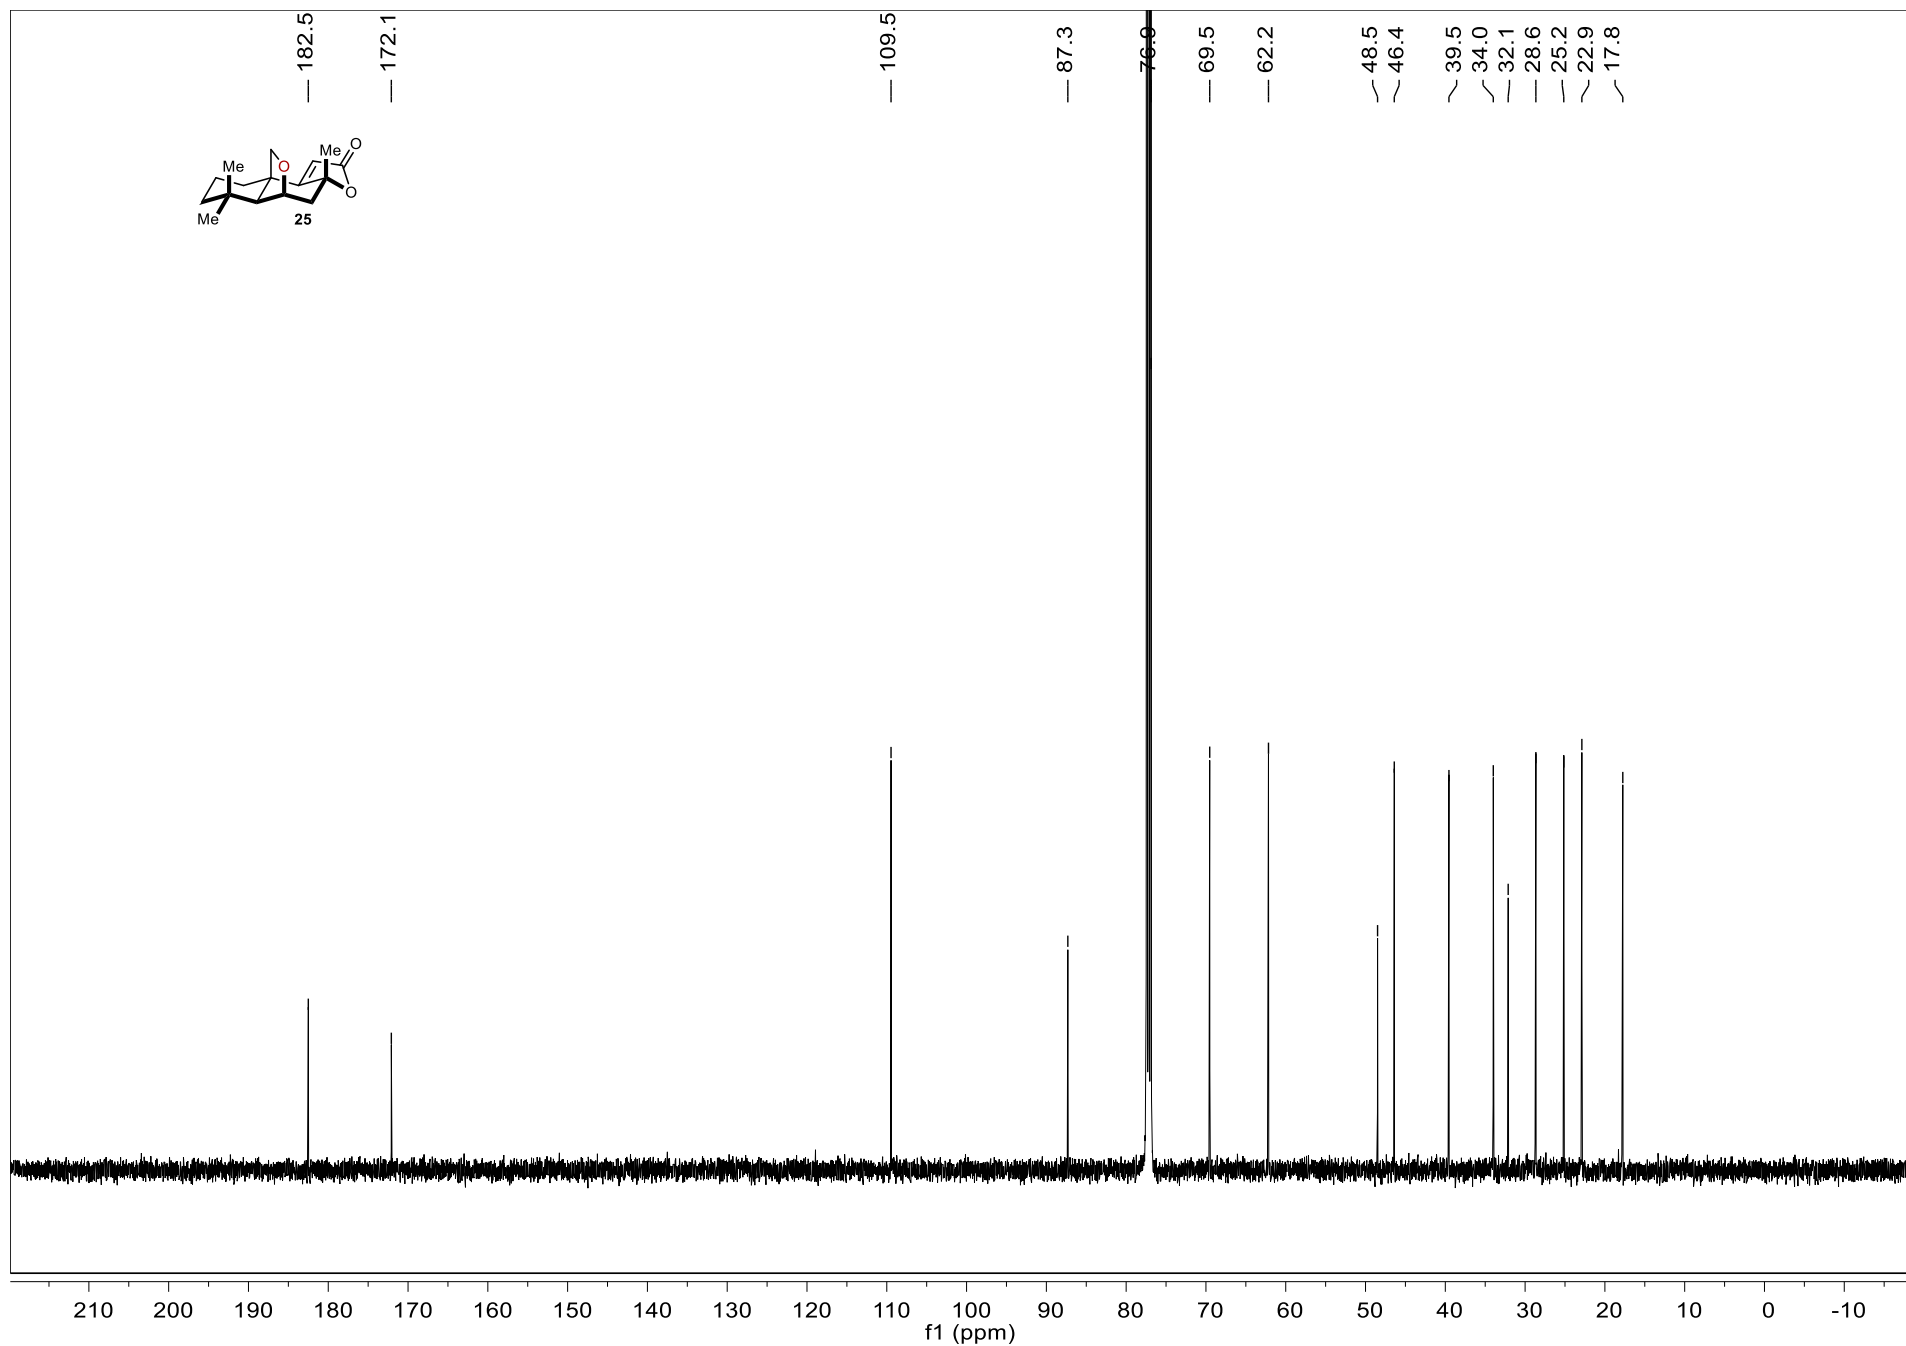

<sup>1</sup>H NMR Spectrum of S2 (500 MHz, CDCl<sub>3</sub>)

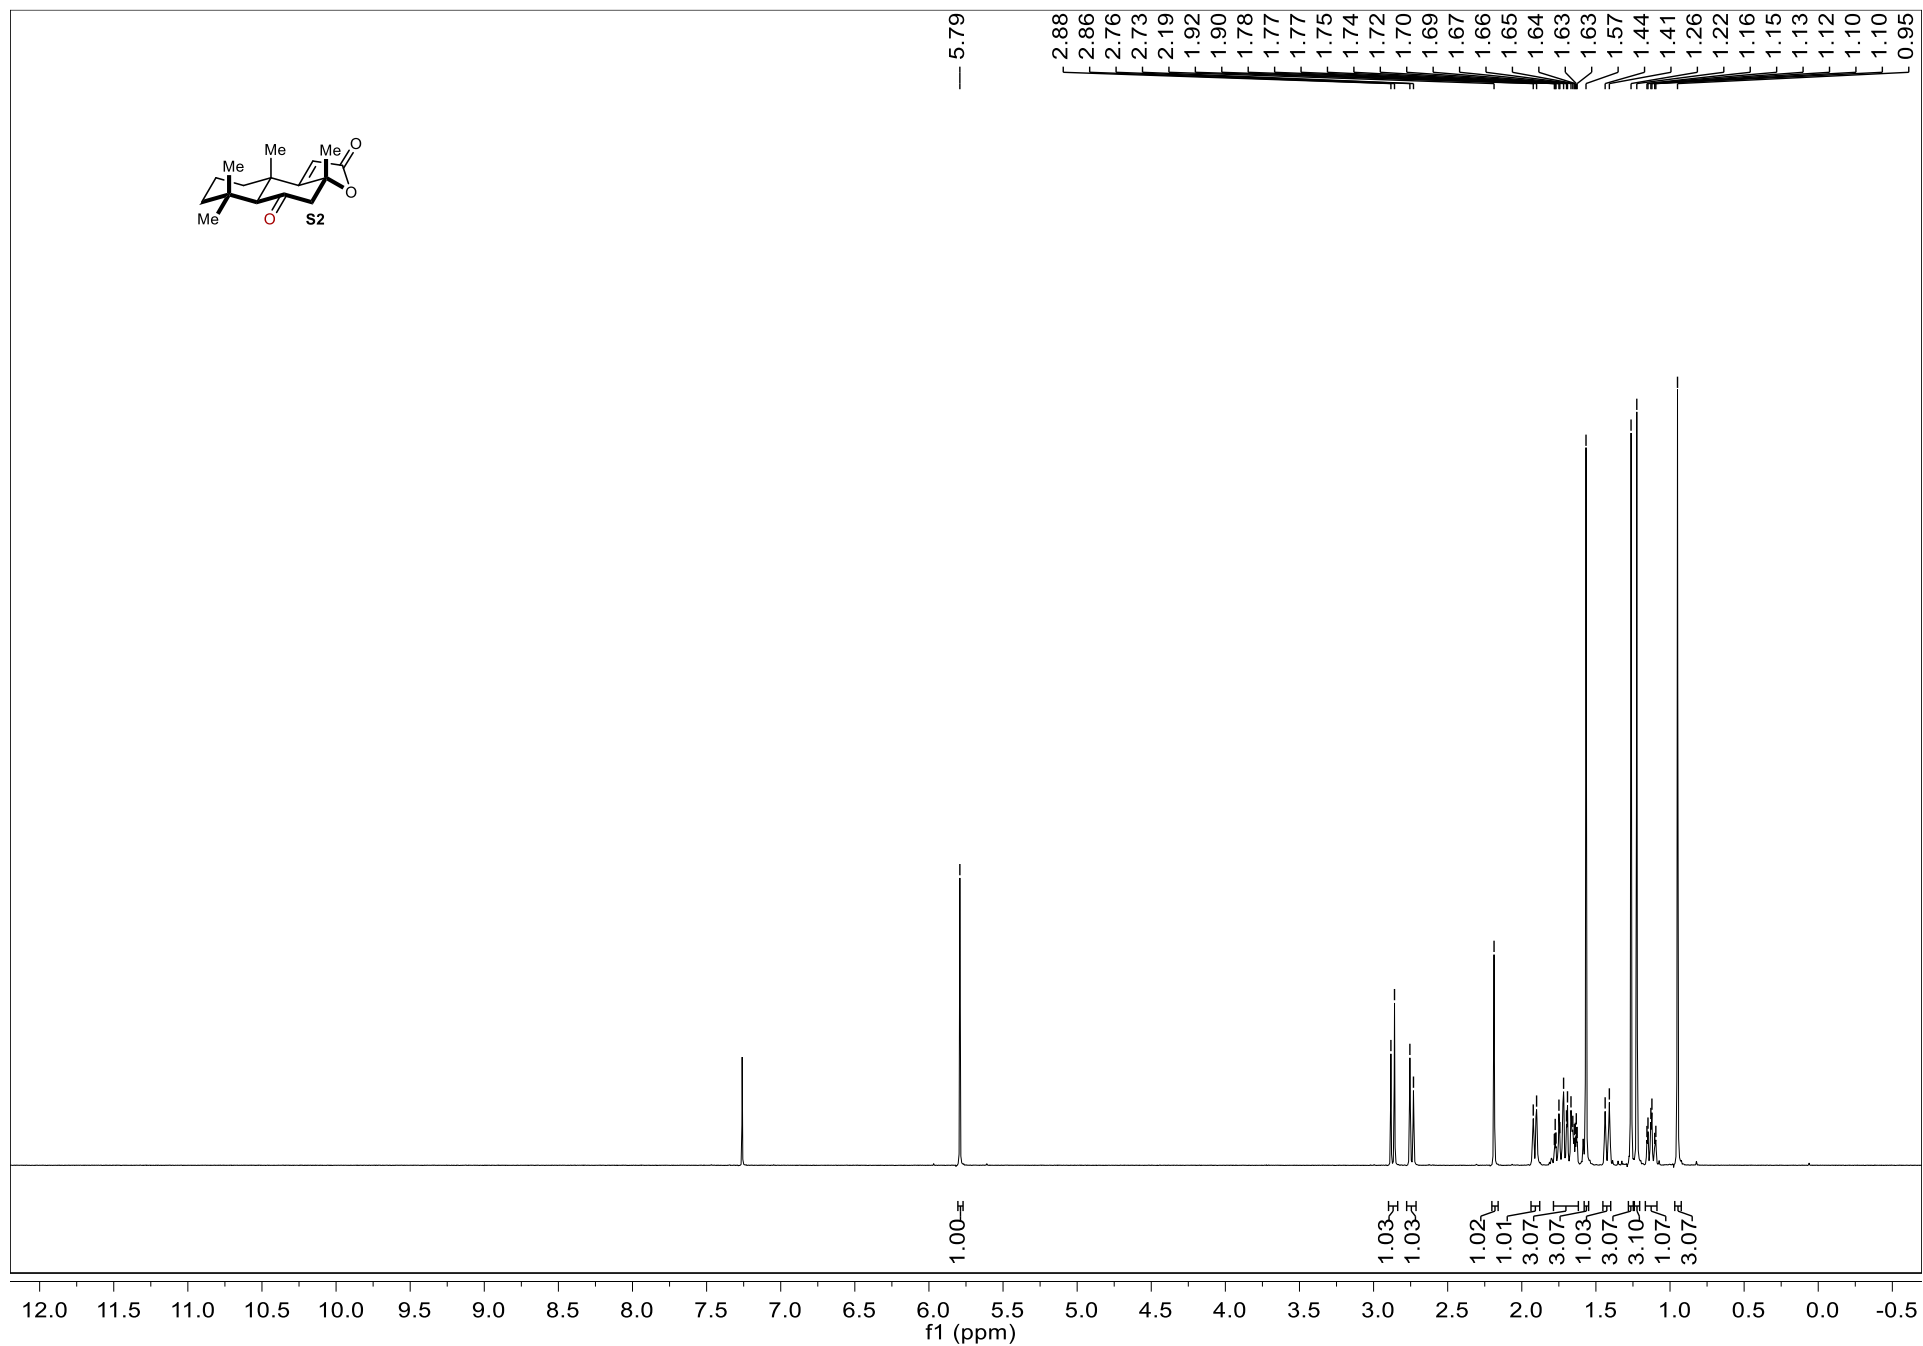

**$^{13}\text{C}$  NMR Spectrum of S2 (126 MHz,  $\text{CDCl}_3$ )**

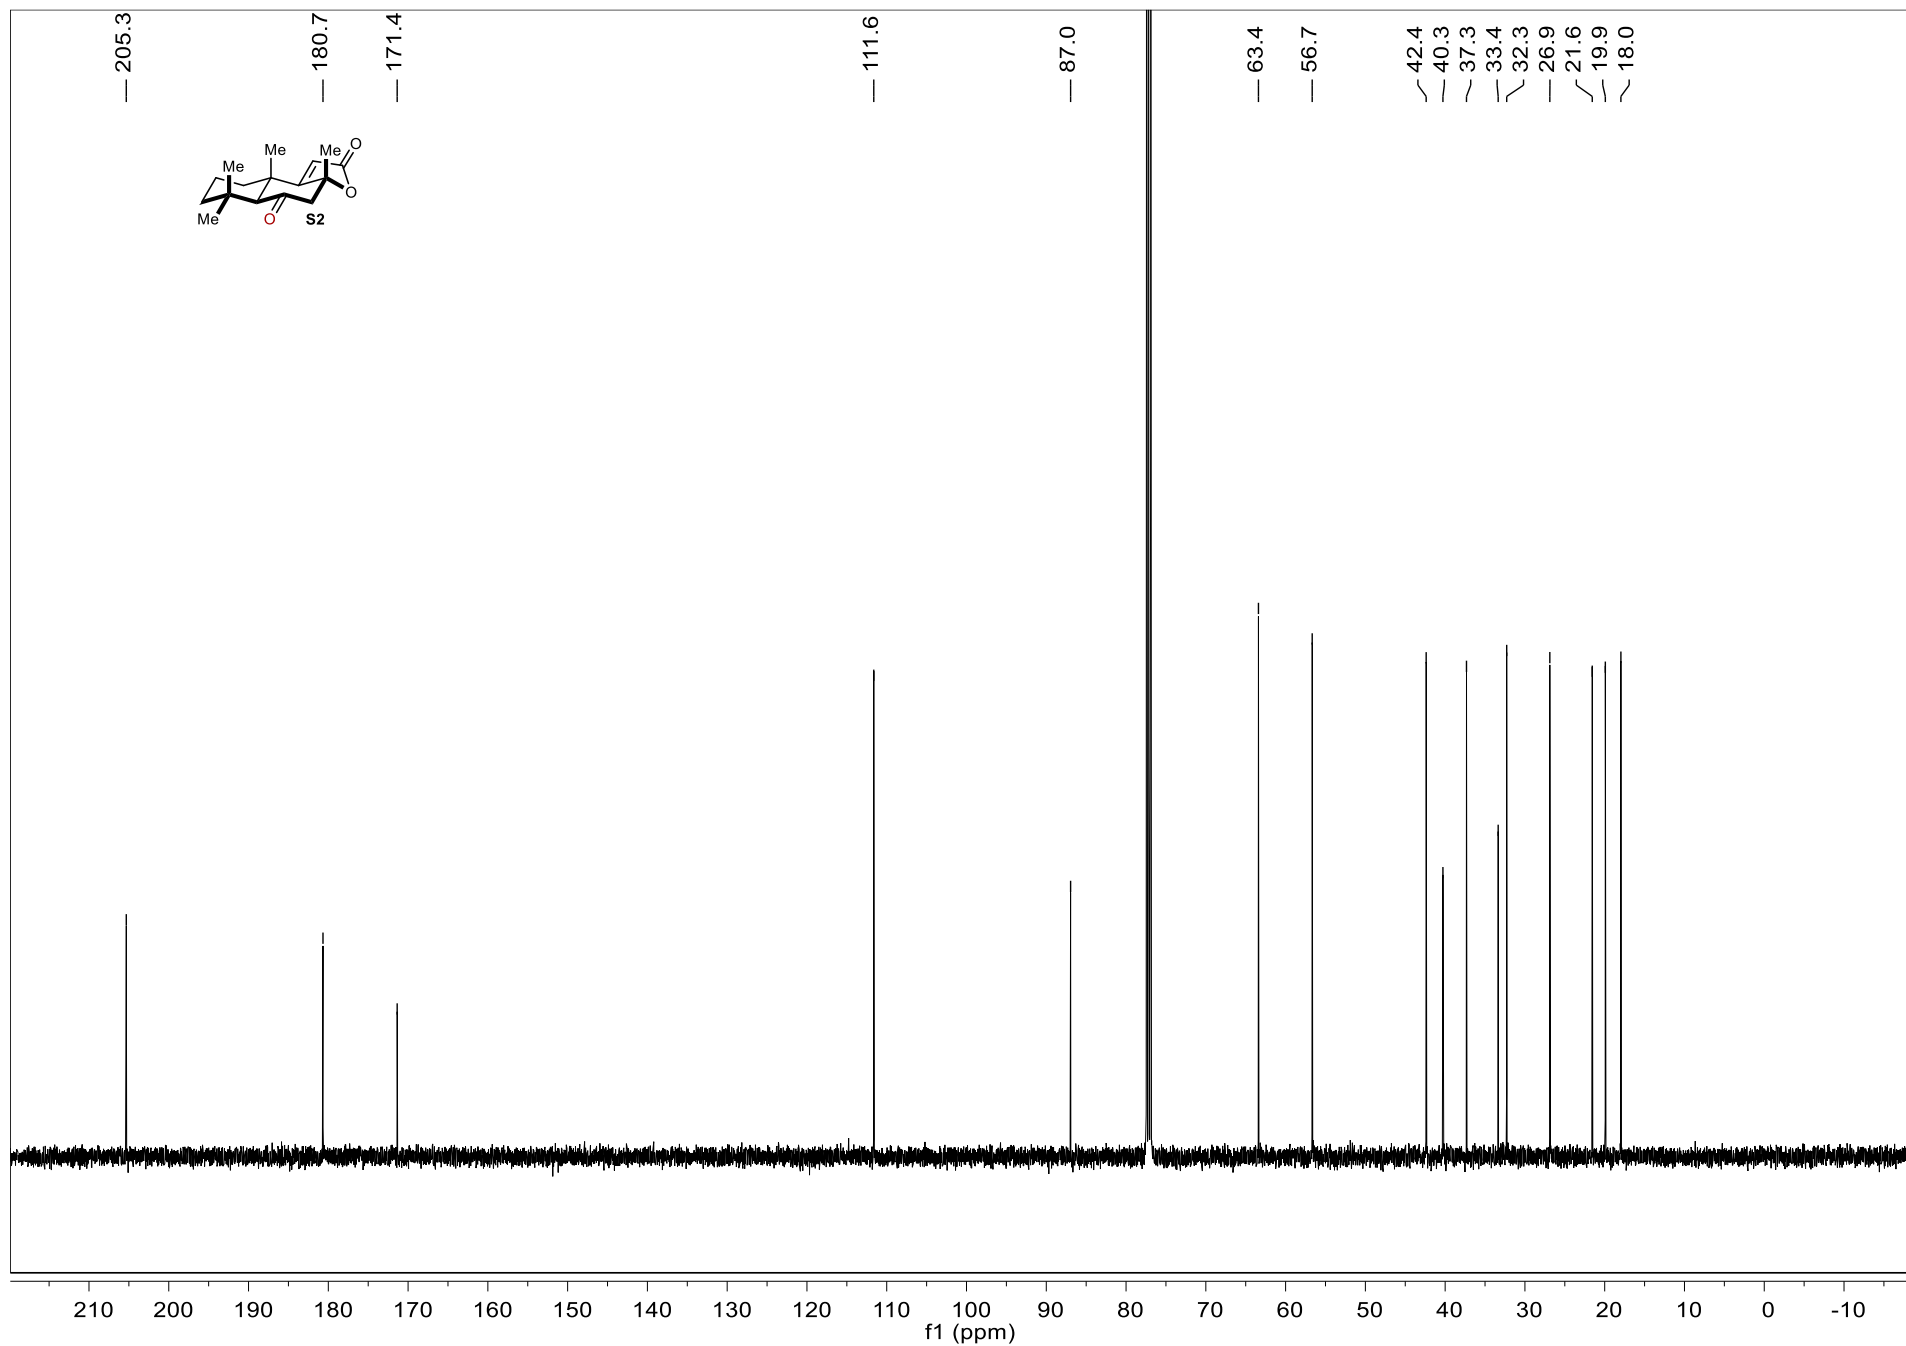

**<sup>1</sup>H NMR Spectrum of compound S3 (500 MHz, CDCl<sub>3</sub>)**

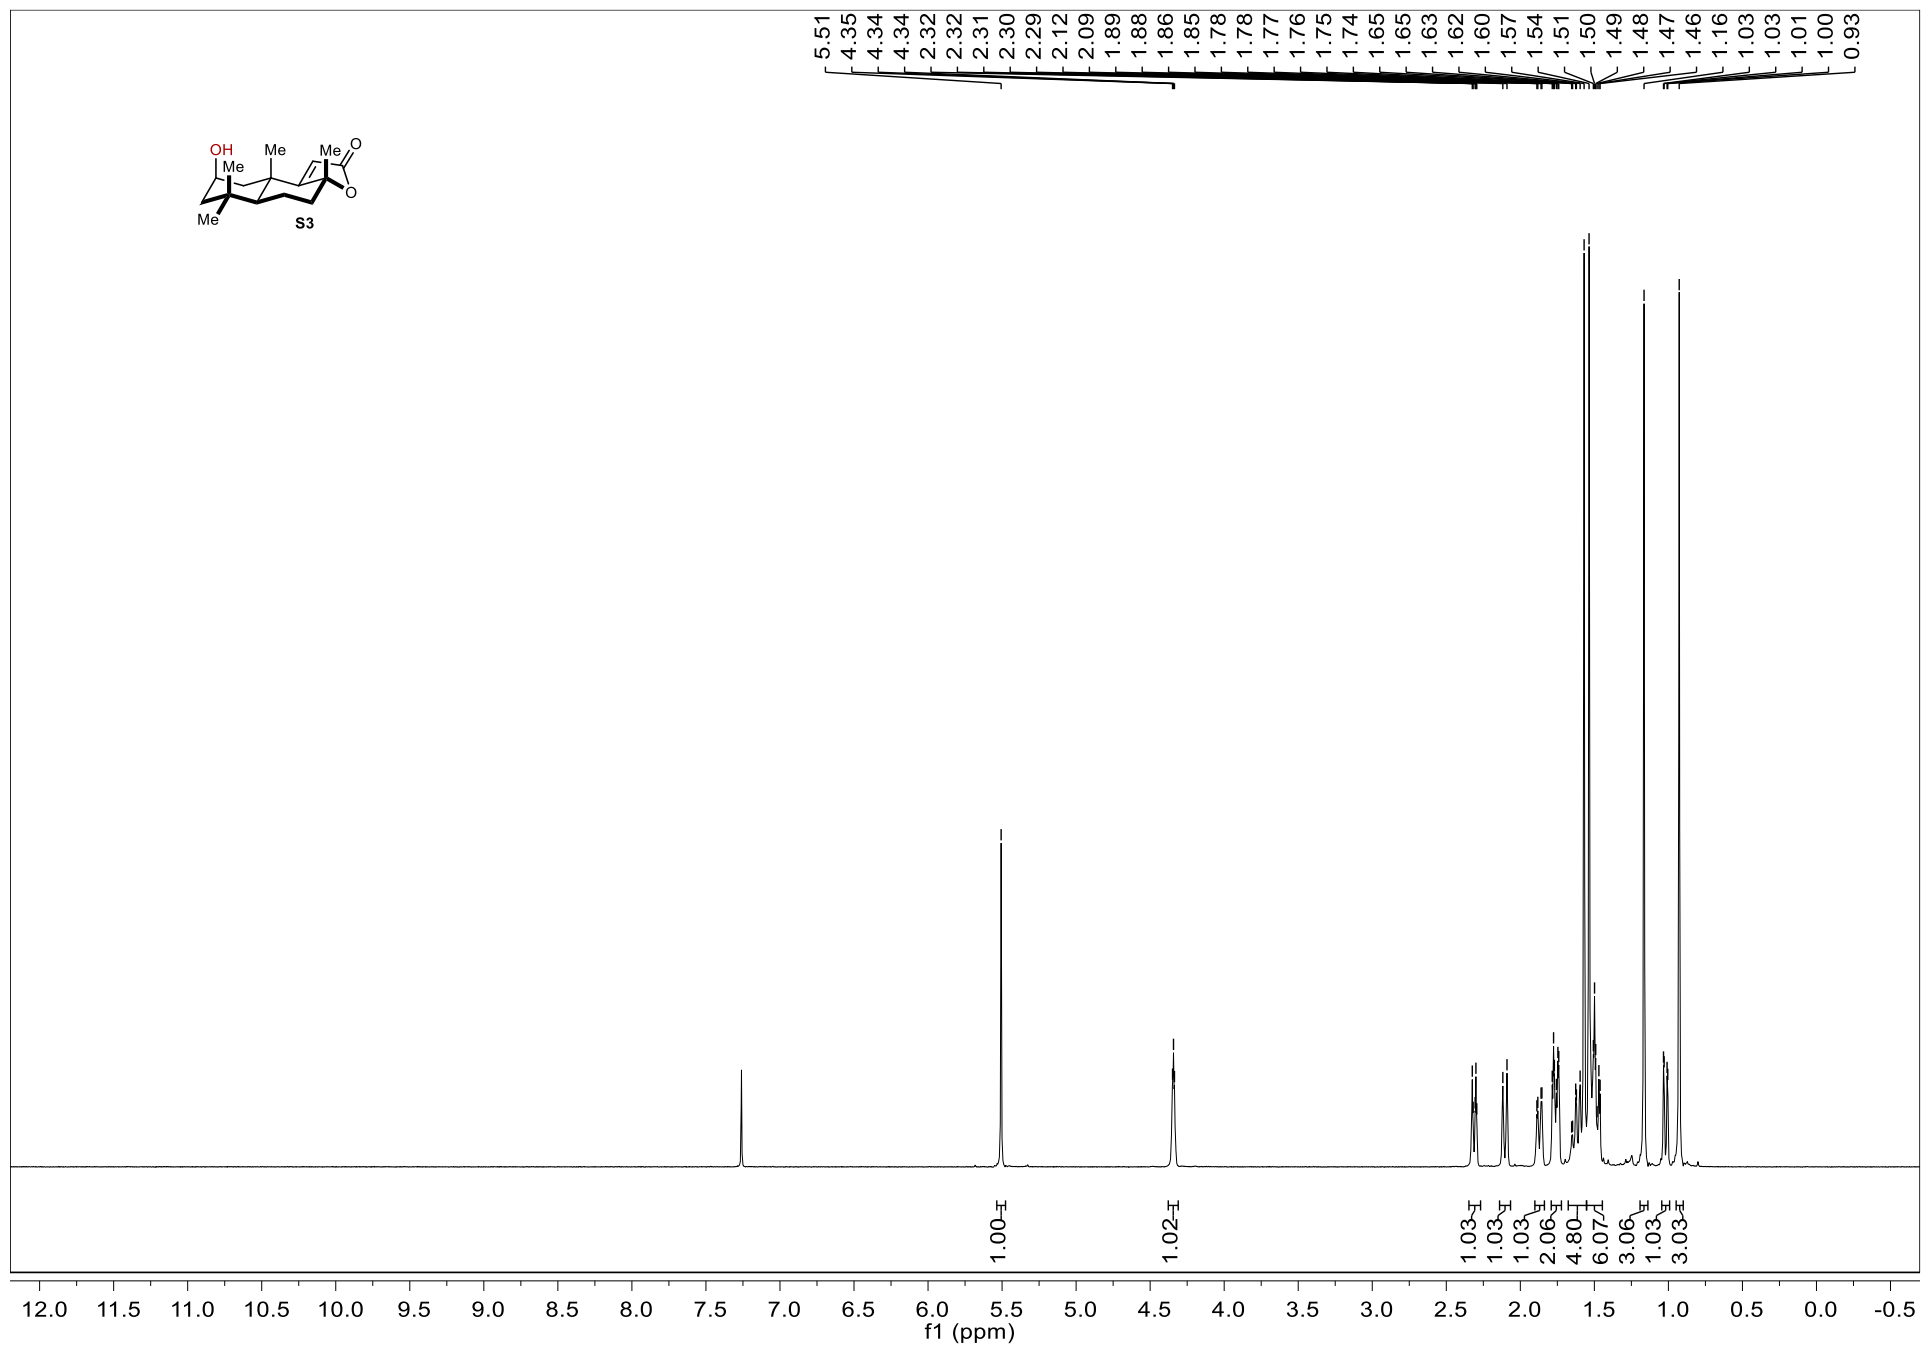

**$^{13}\text{C}$  NMR Spectrum of compound S3 (126 MHz,  $\text{CDCl}_3$ )**

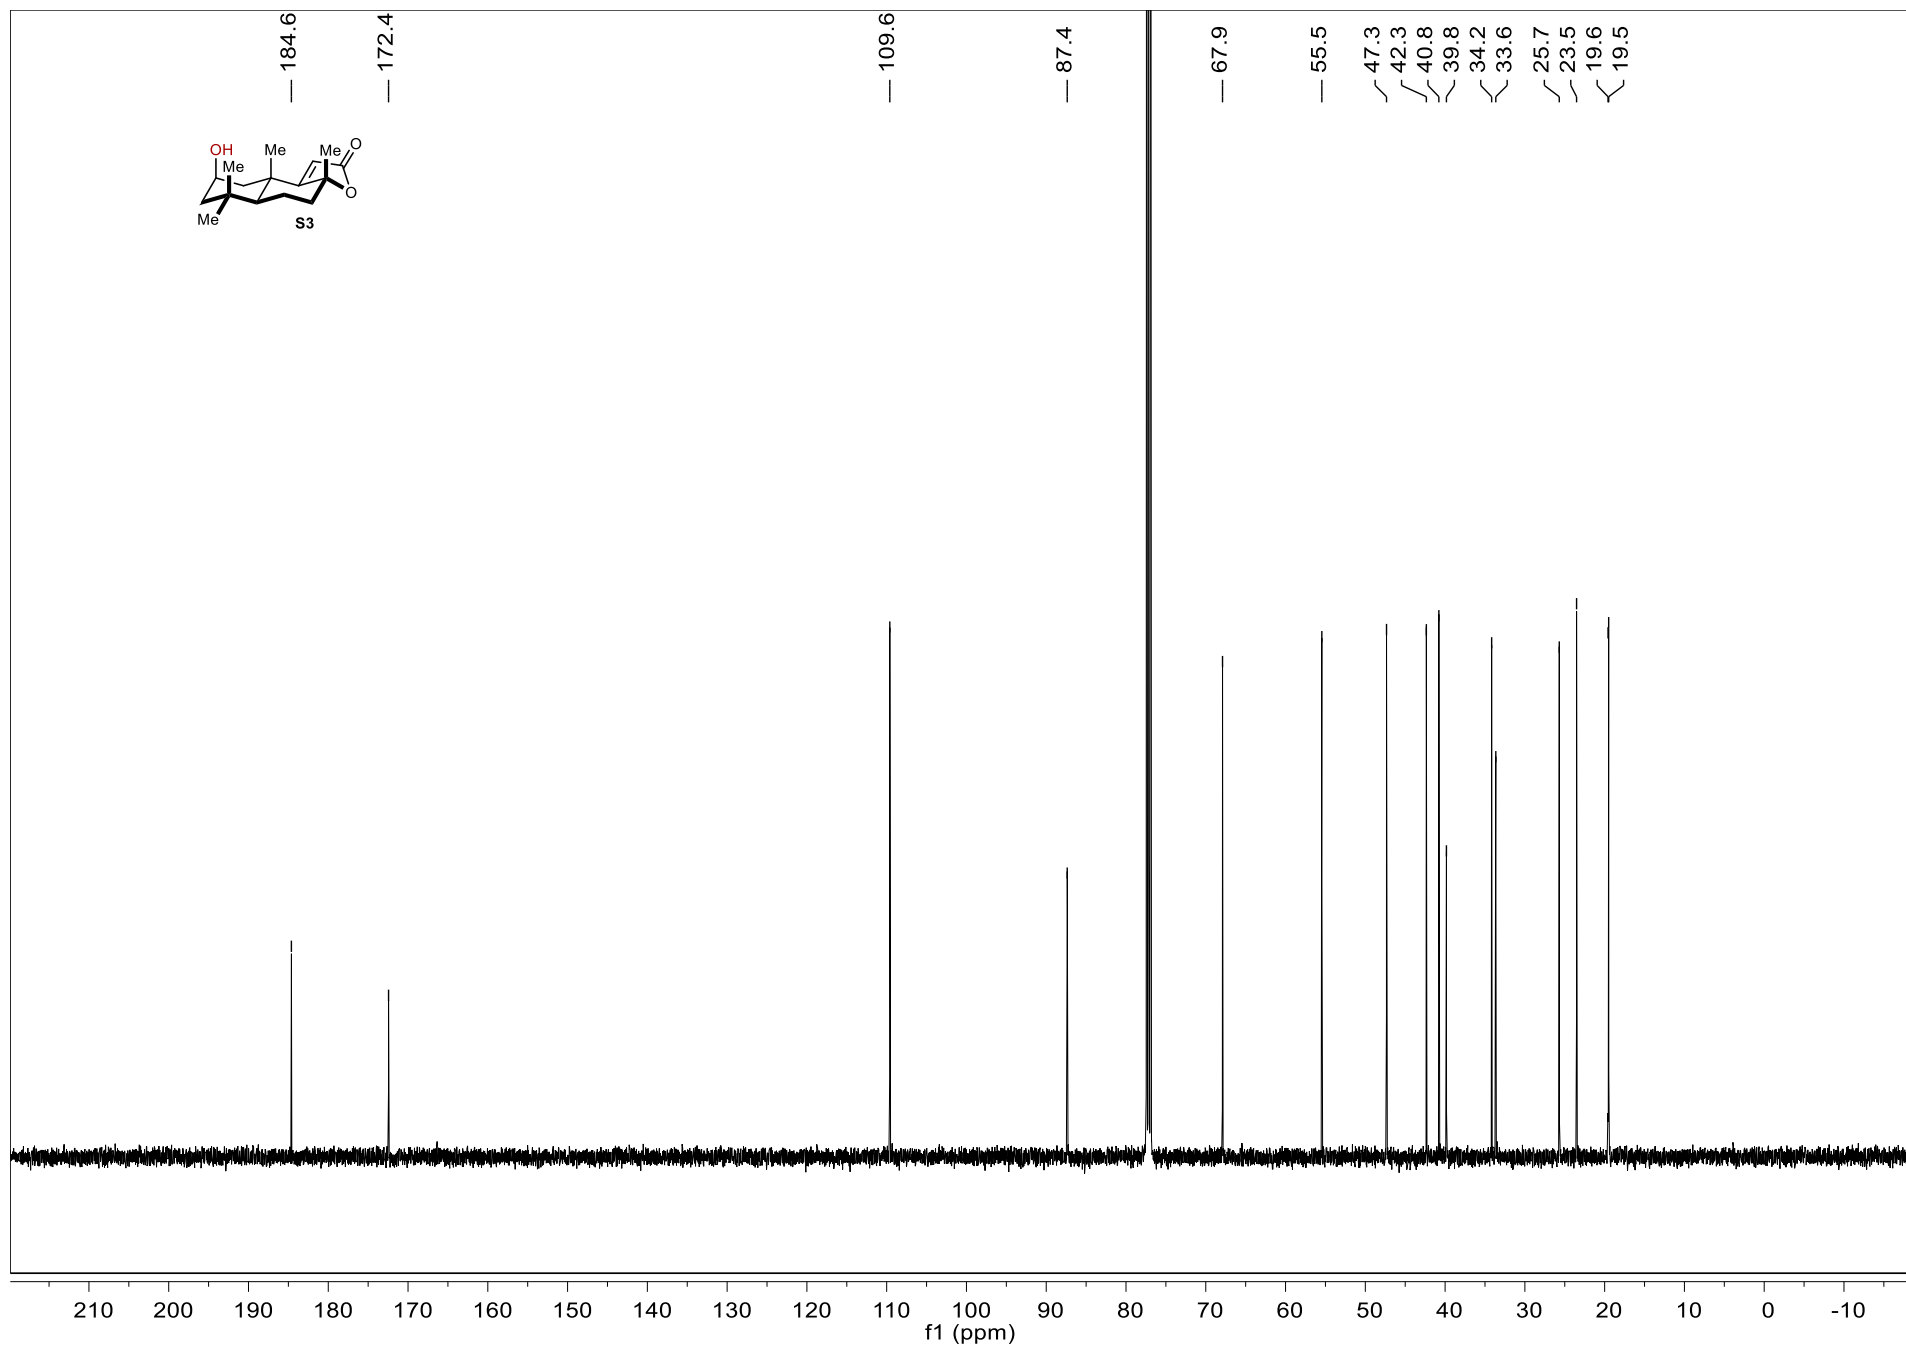



**$^{13}\text{C}$  NMR Spectrum of compound 26 (126 MHz,  $\text{CDCl}_3$ )**

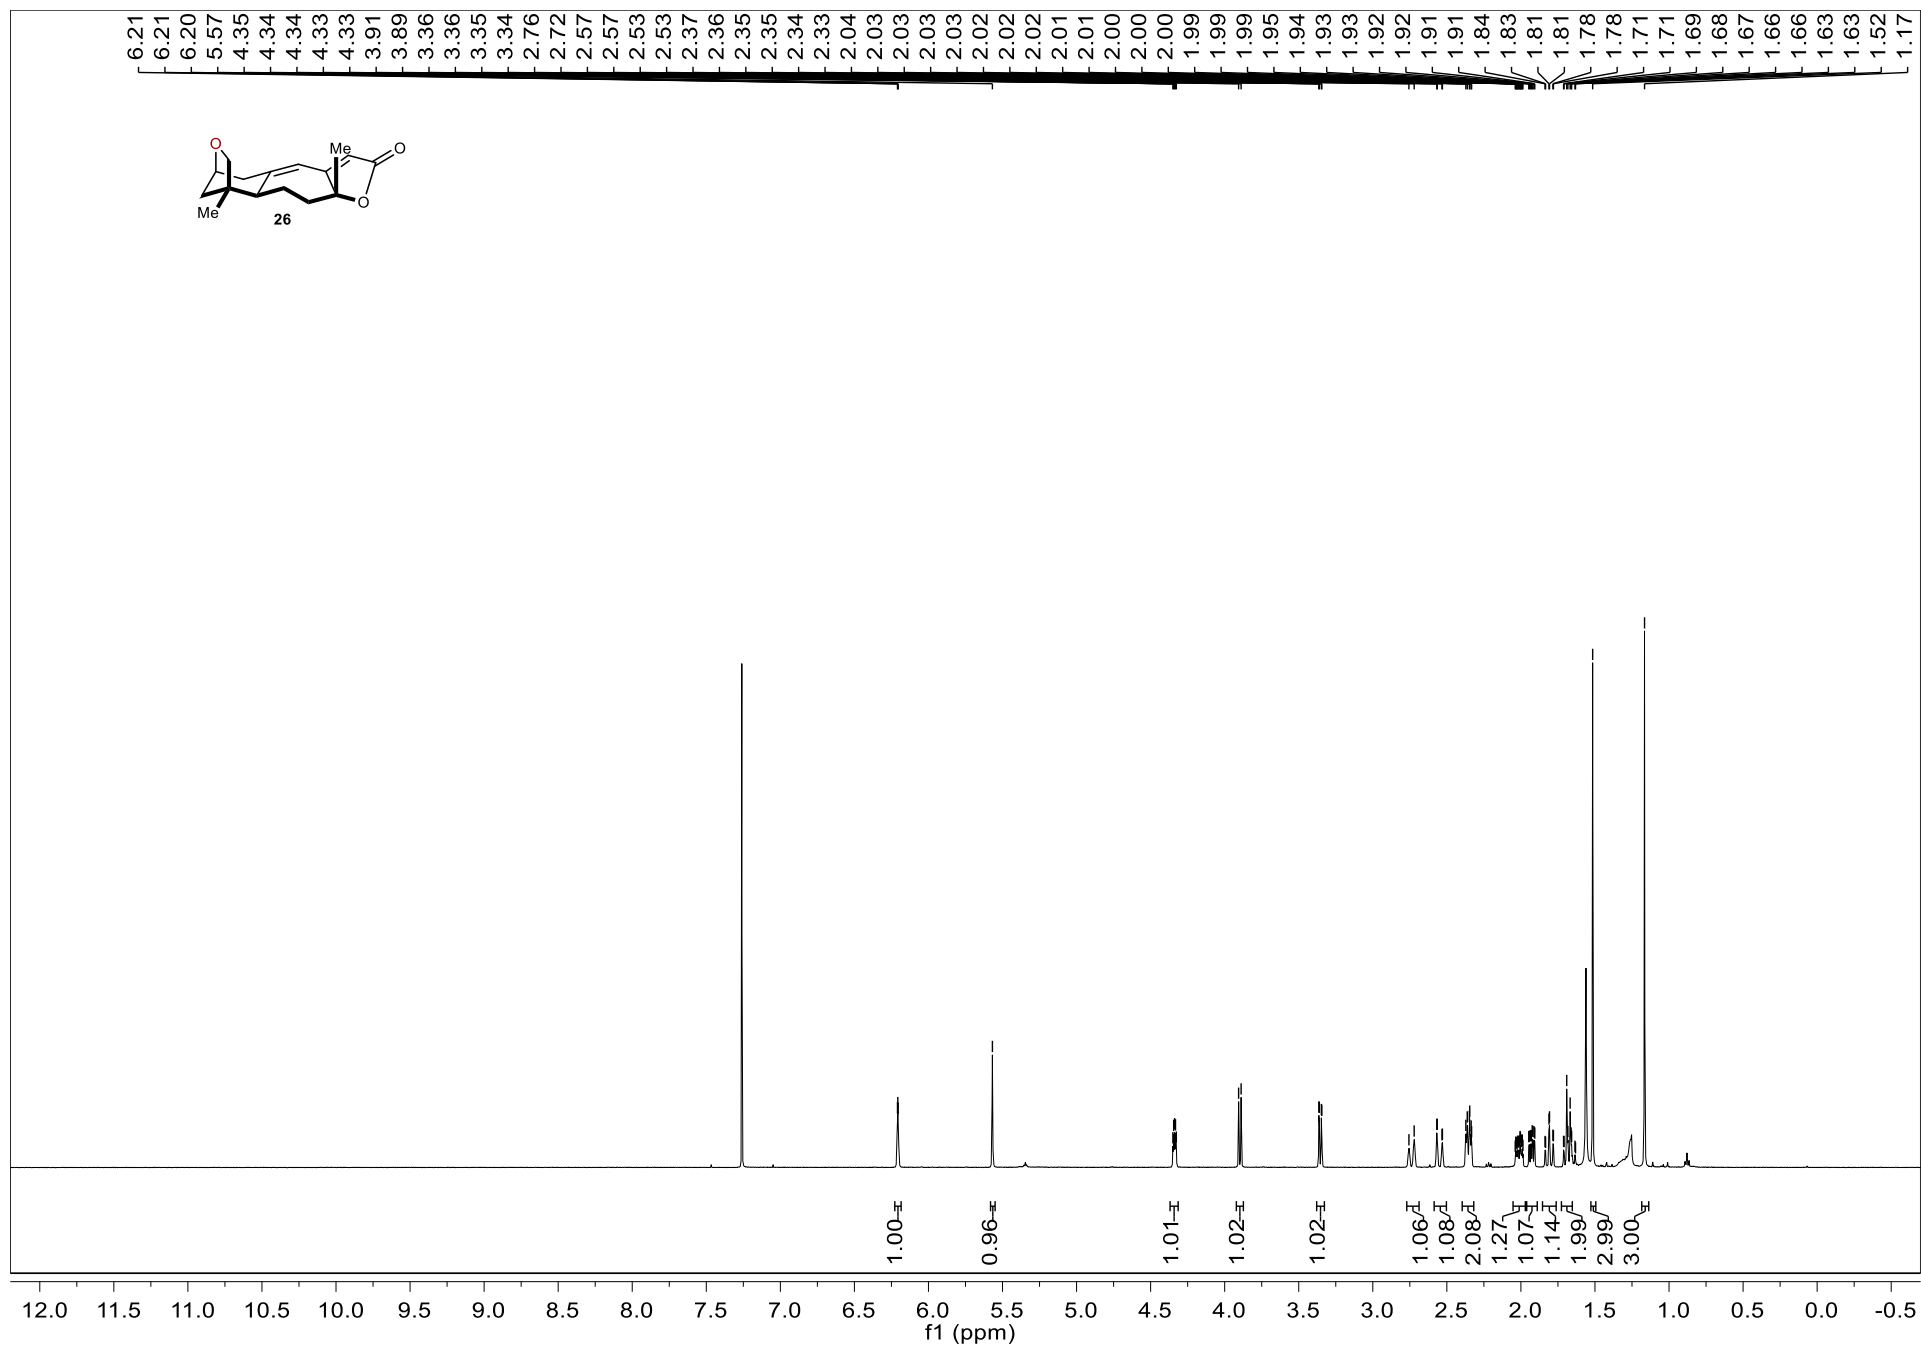

**$^{13}\text{C}$  NMR Spectrum of compound 26 (126 MHz,  $\text{CDCl}_3$ )**

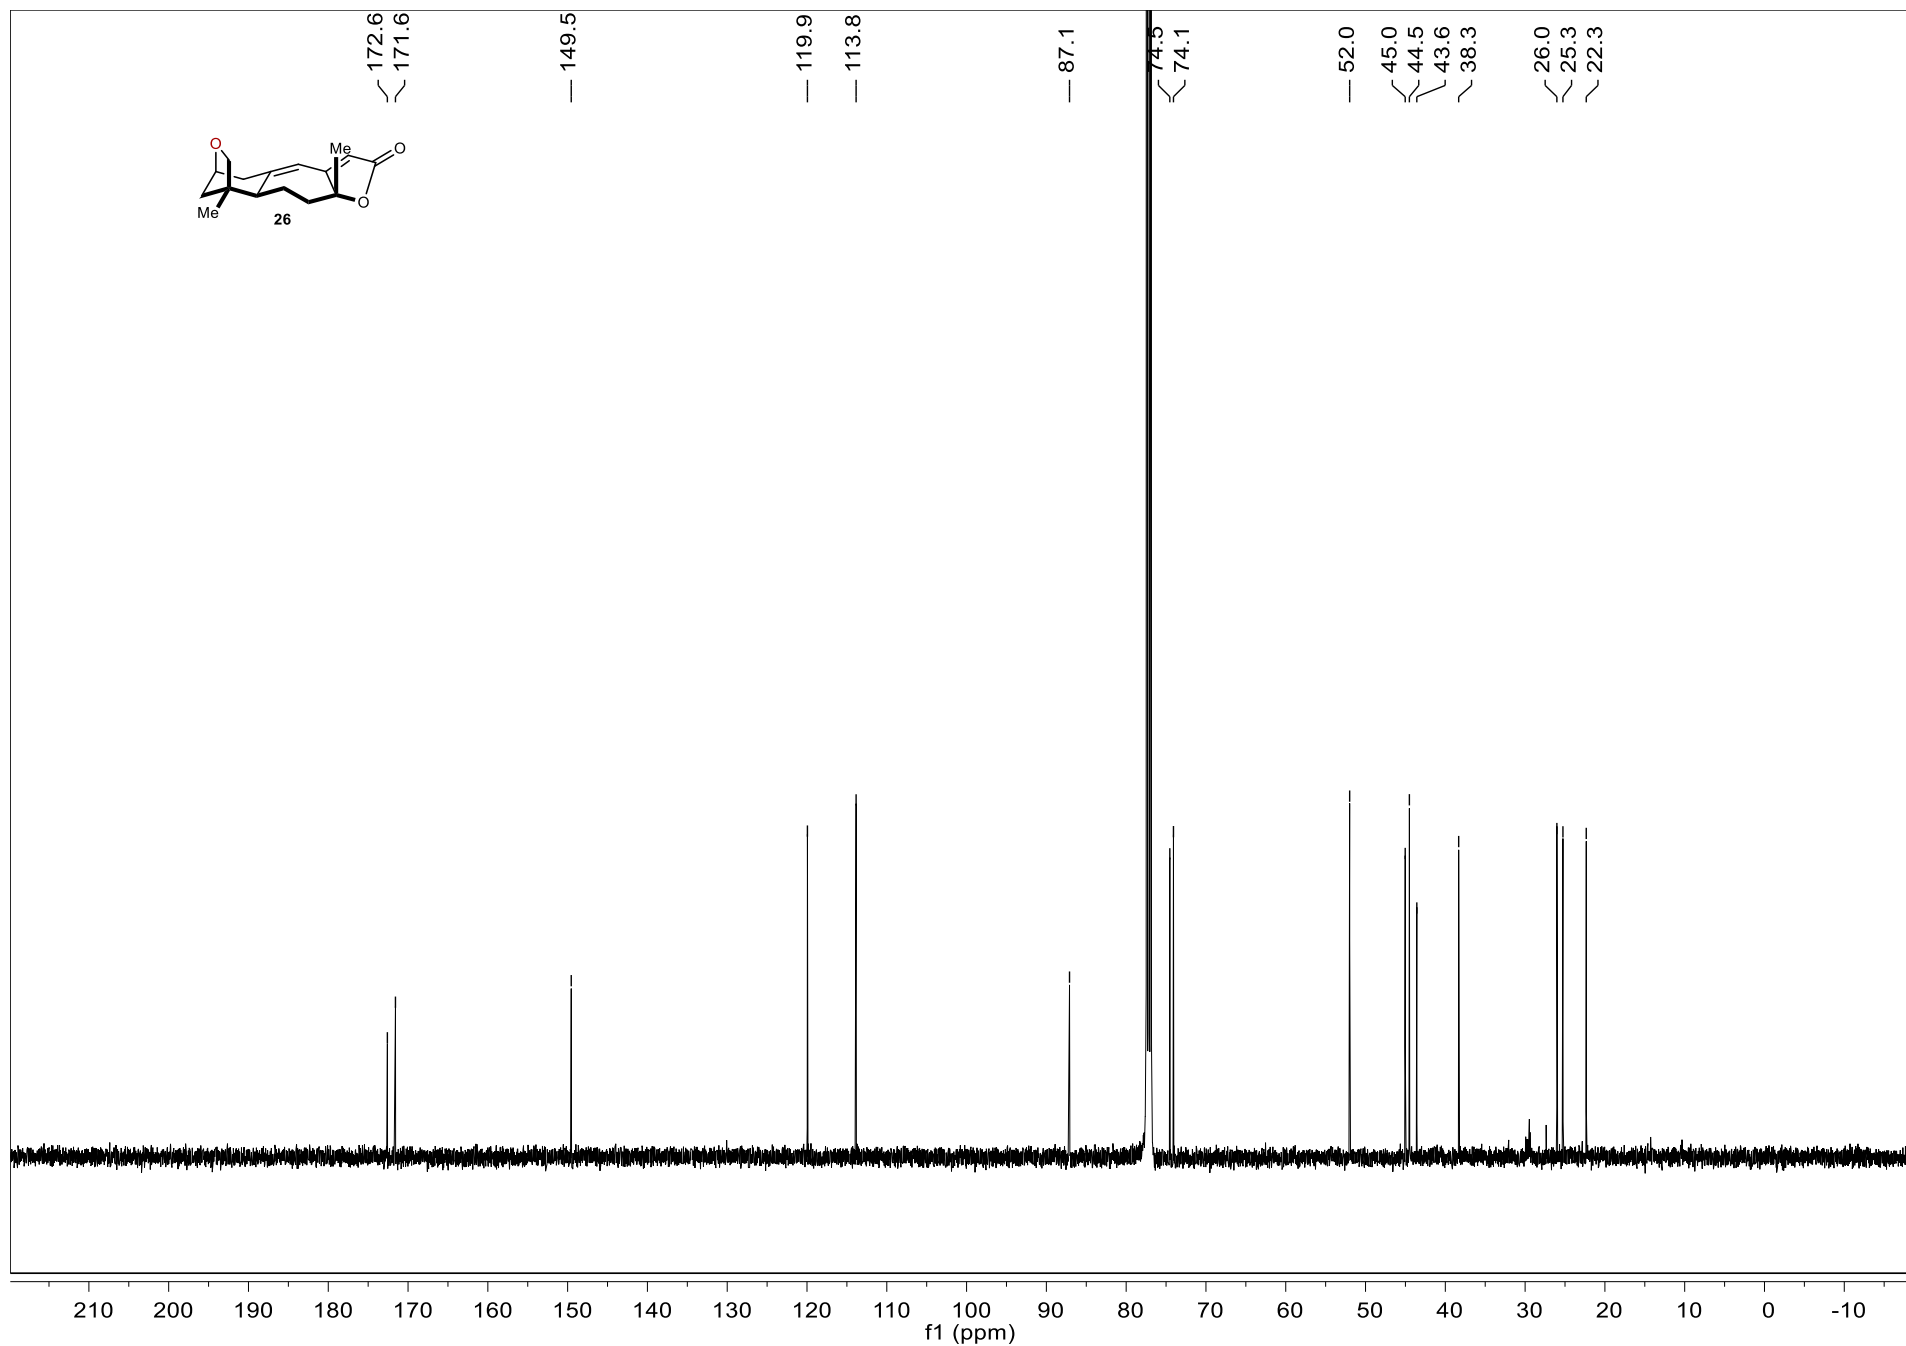

<sup>1</sup>H NMR Spectrum of S4 (500 MHz, CDCl<sub>3</sub>)

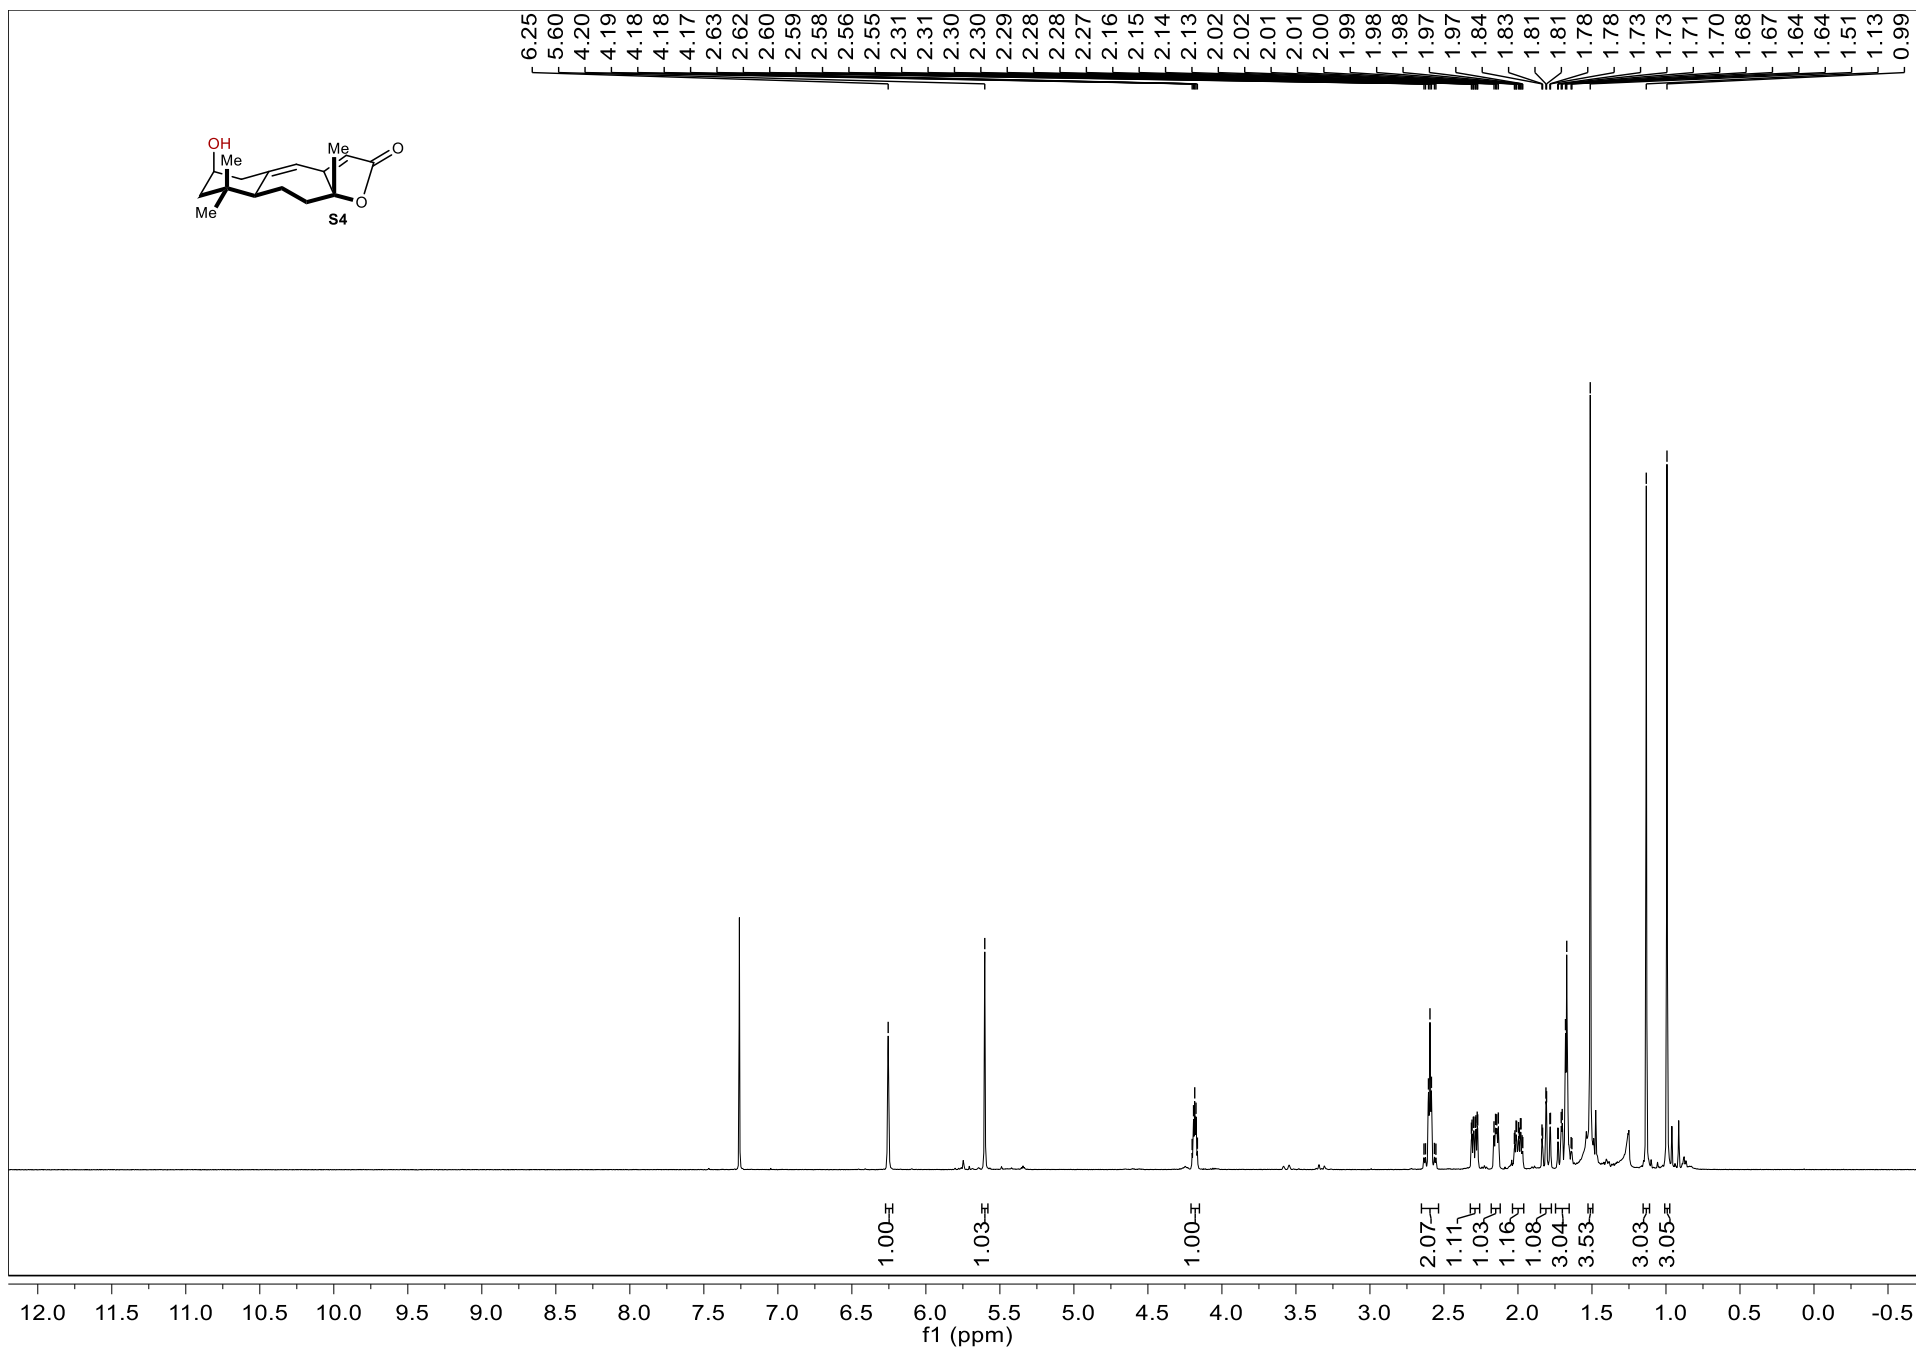

**$^{13}\text{C}$  NMR Spectrum of S4 (126 MHz,  $\text{CDCl}_3$ )**

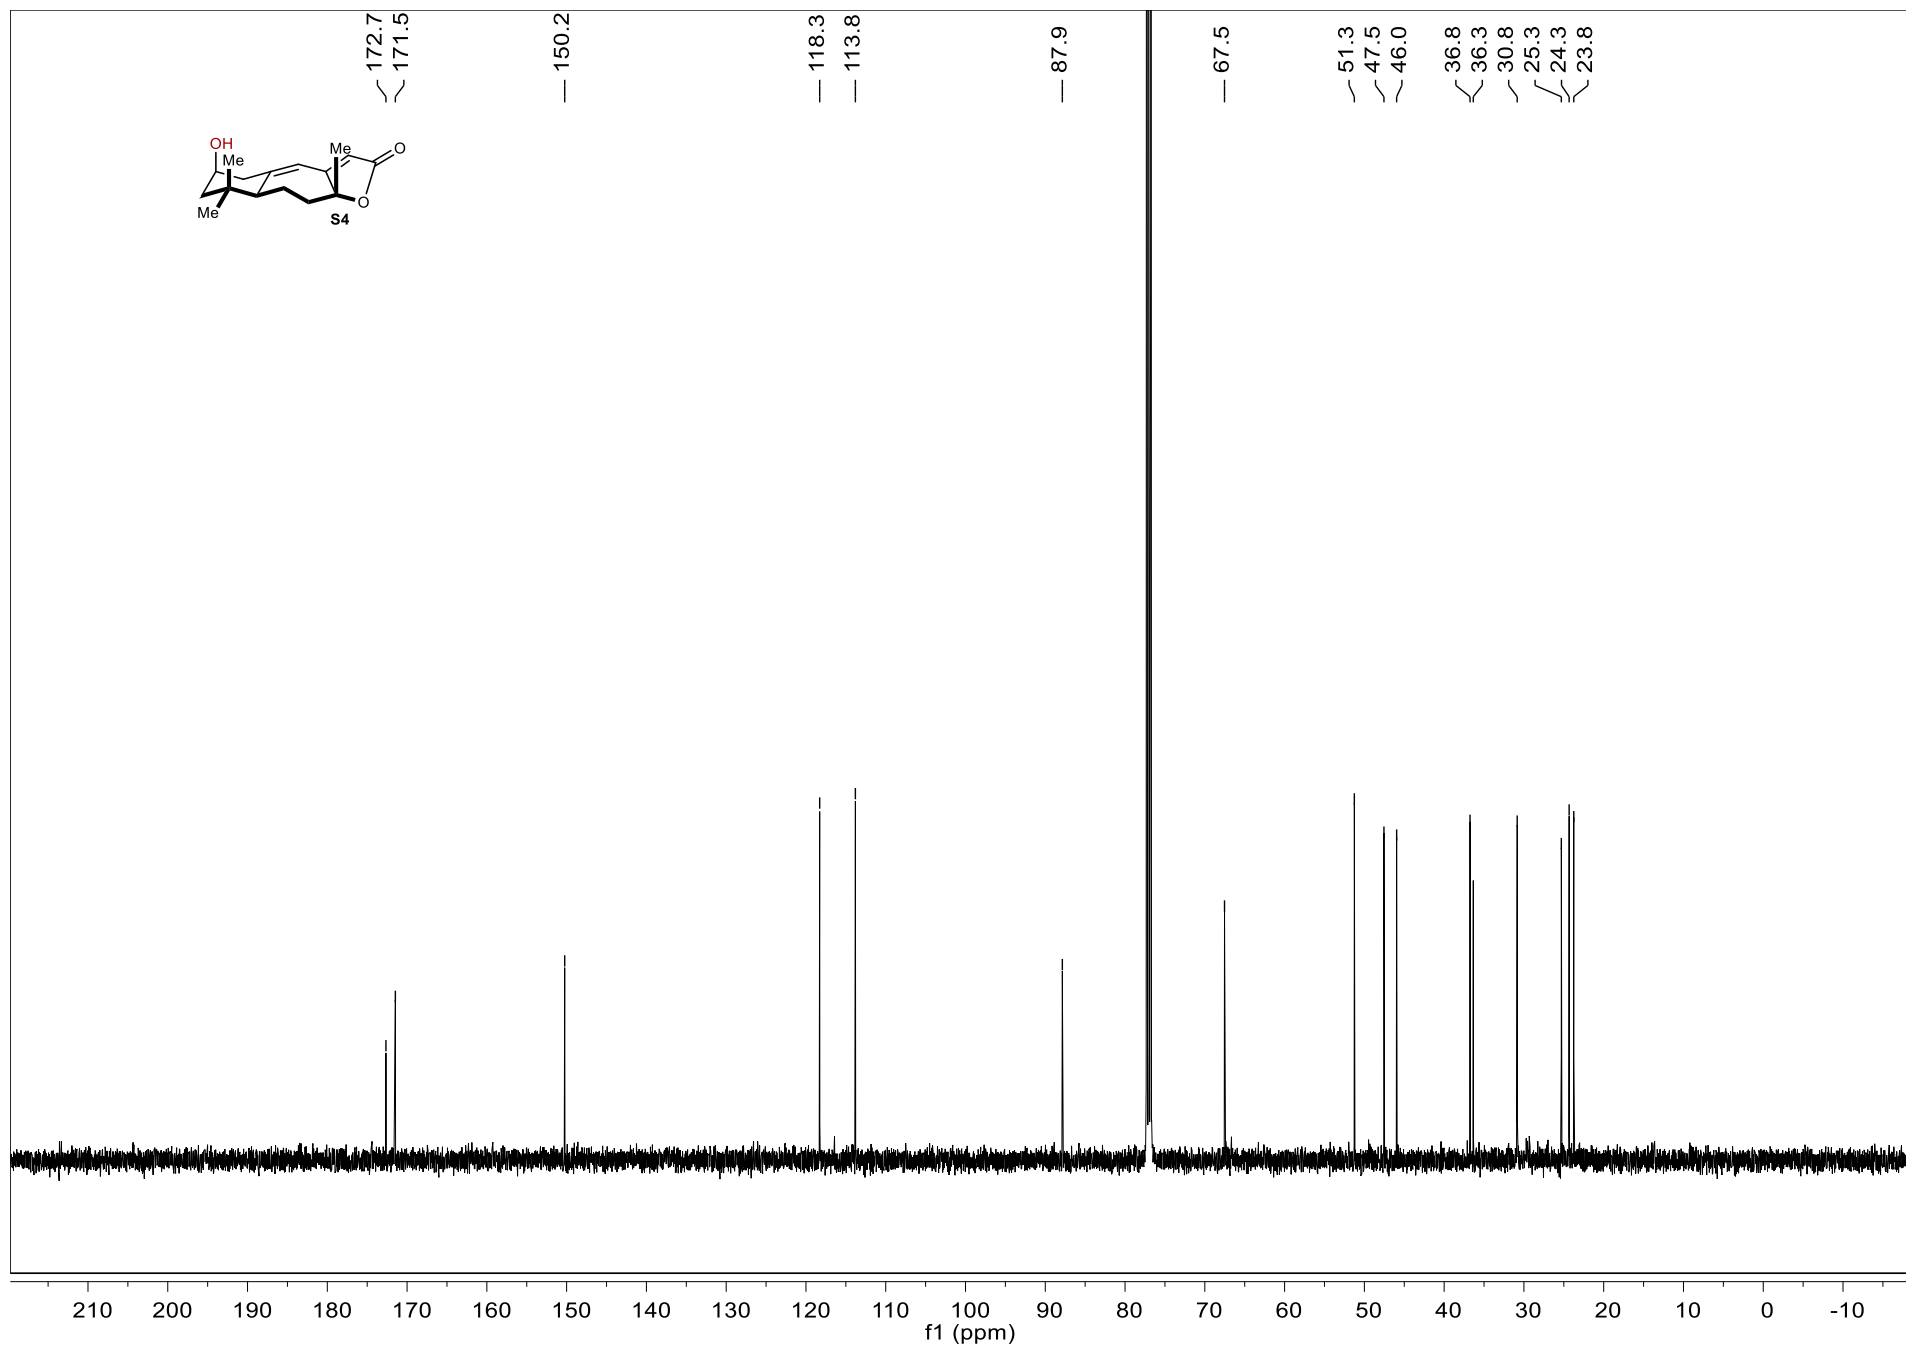

**<sup>1</sup>H NMR Spectrum of compound 27 (500 MHz, CDCl<sub>3</sub>)**

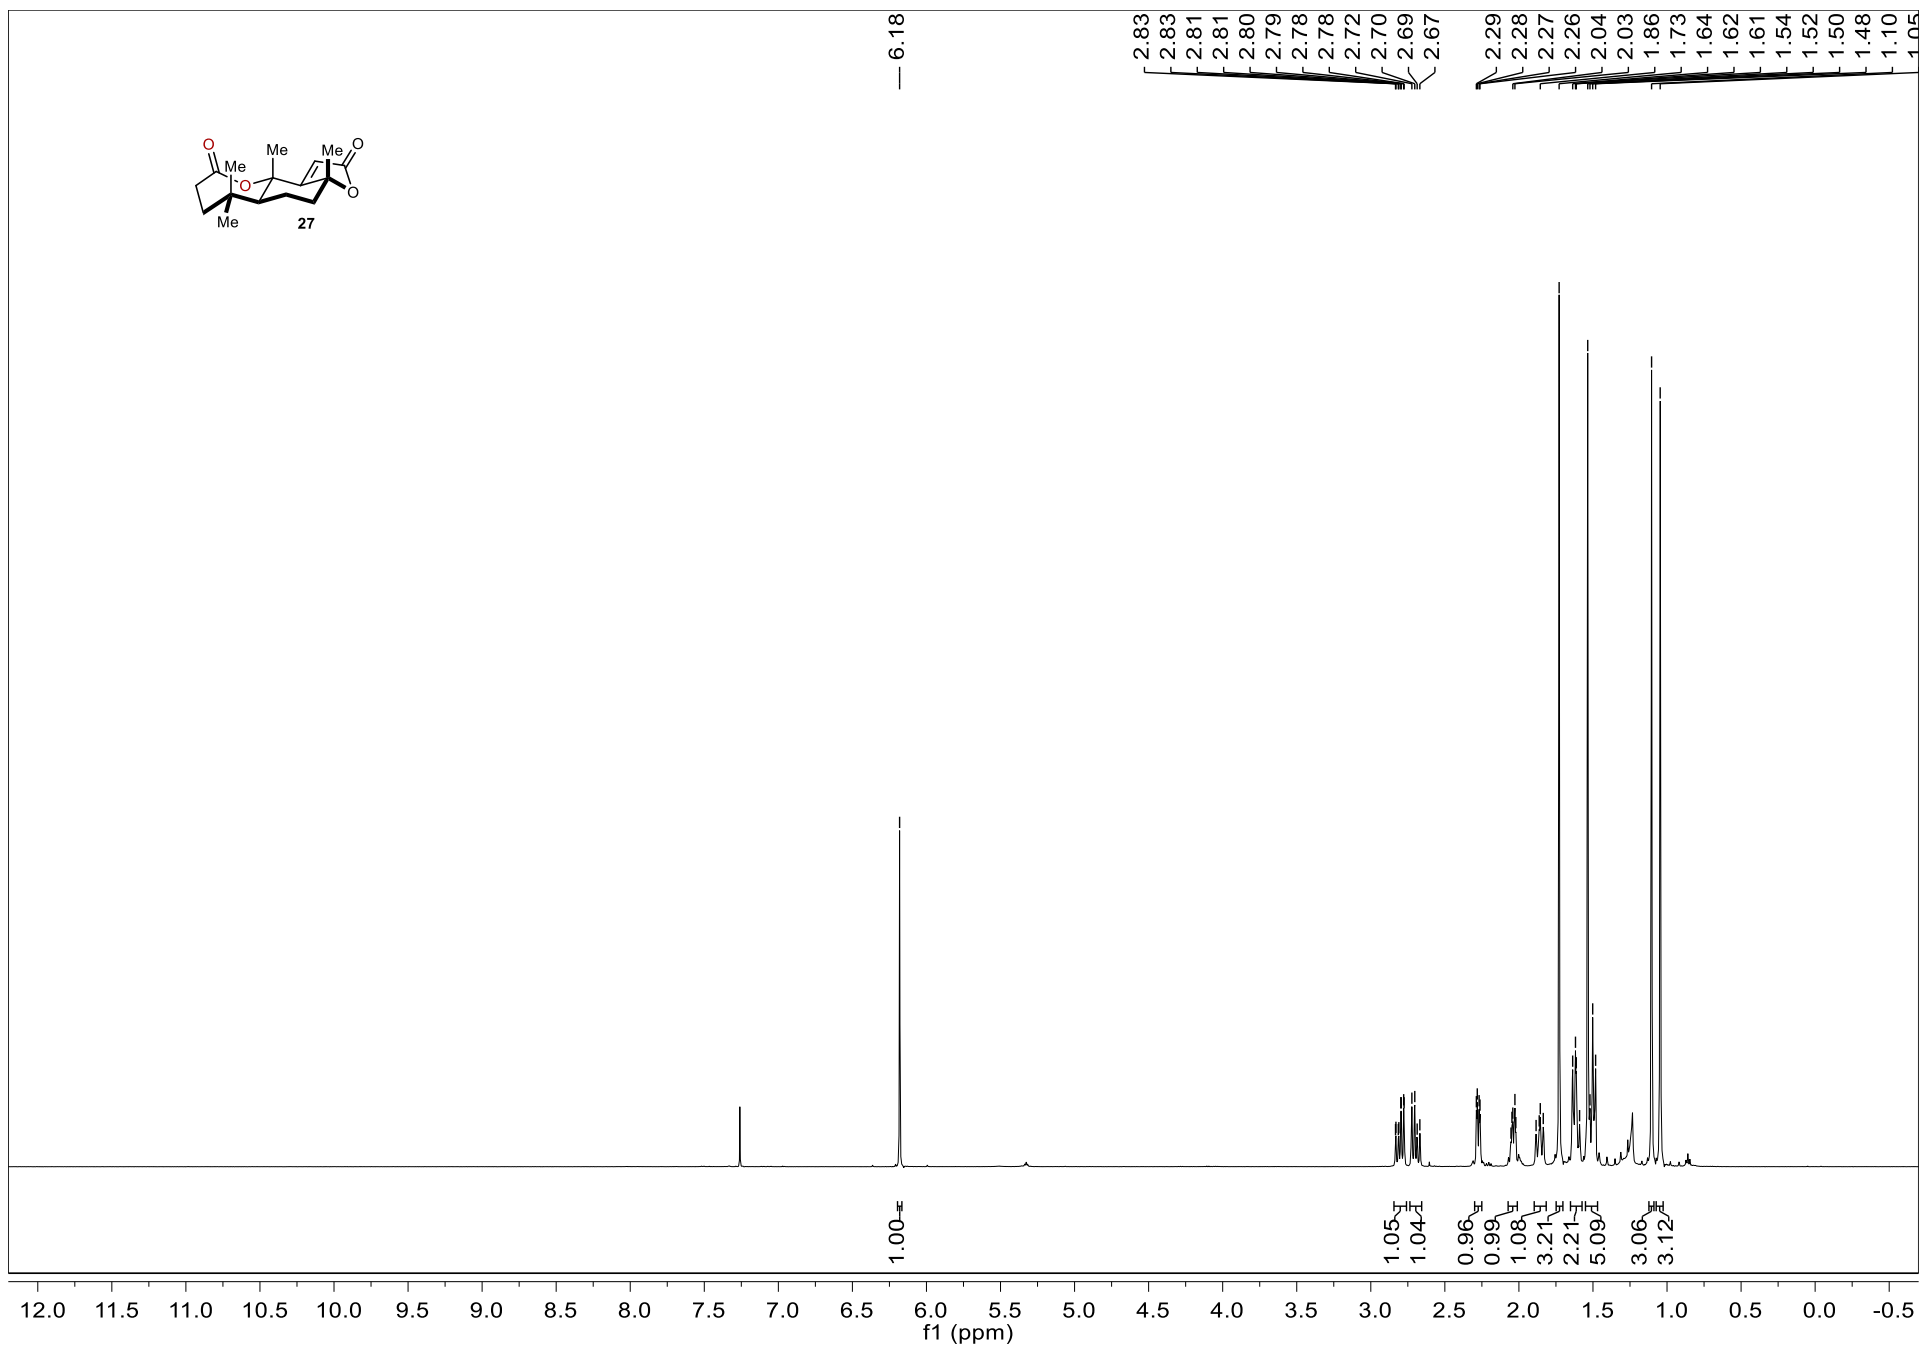

**$^{13}\text{C}$  NMR Spectrum of compound 27 (126 MHz,  $\text{CDCl}_3$ )**

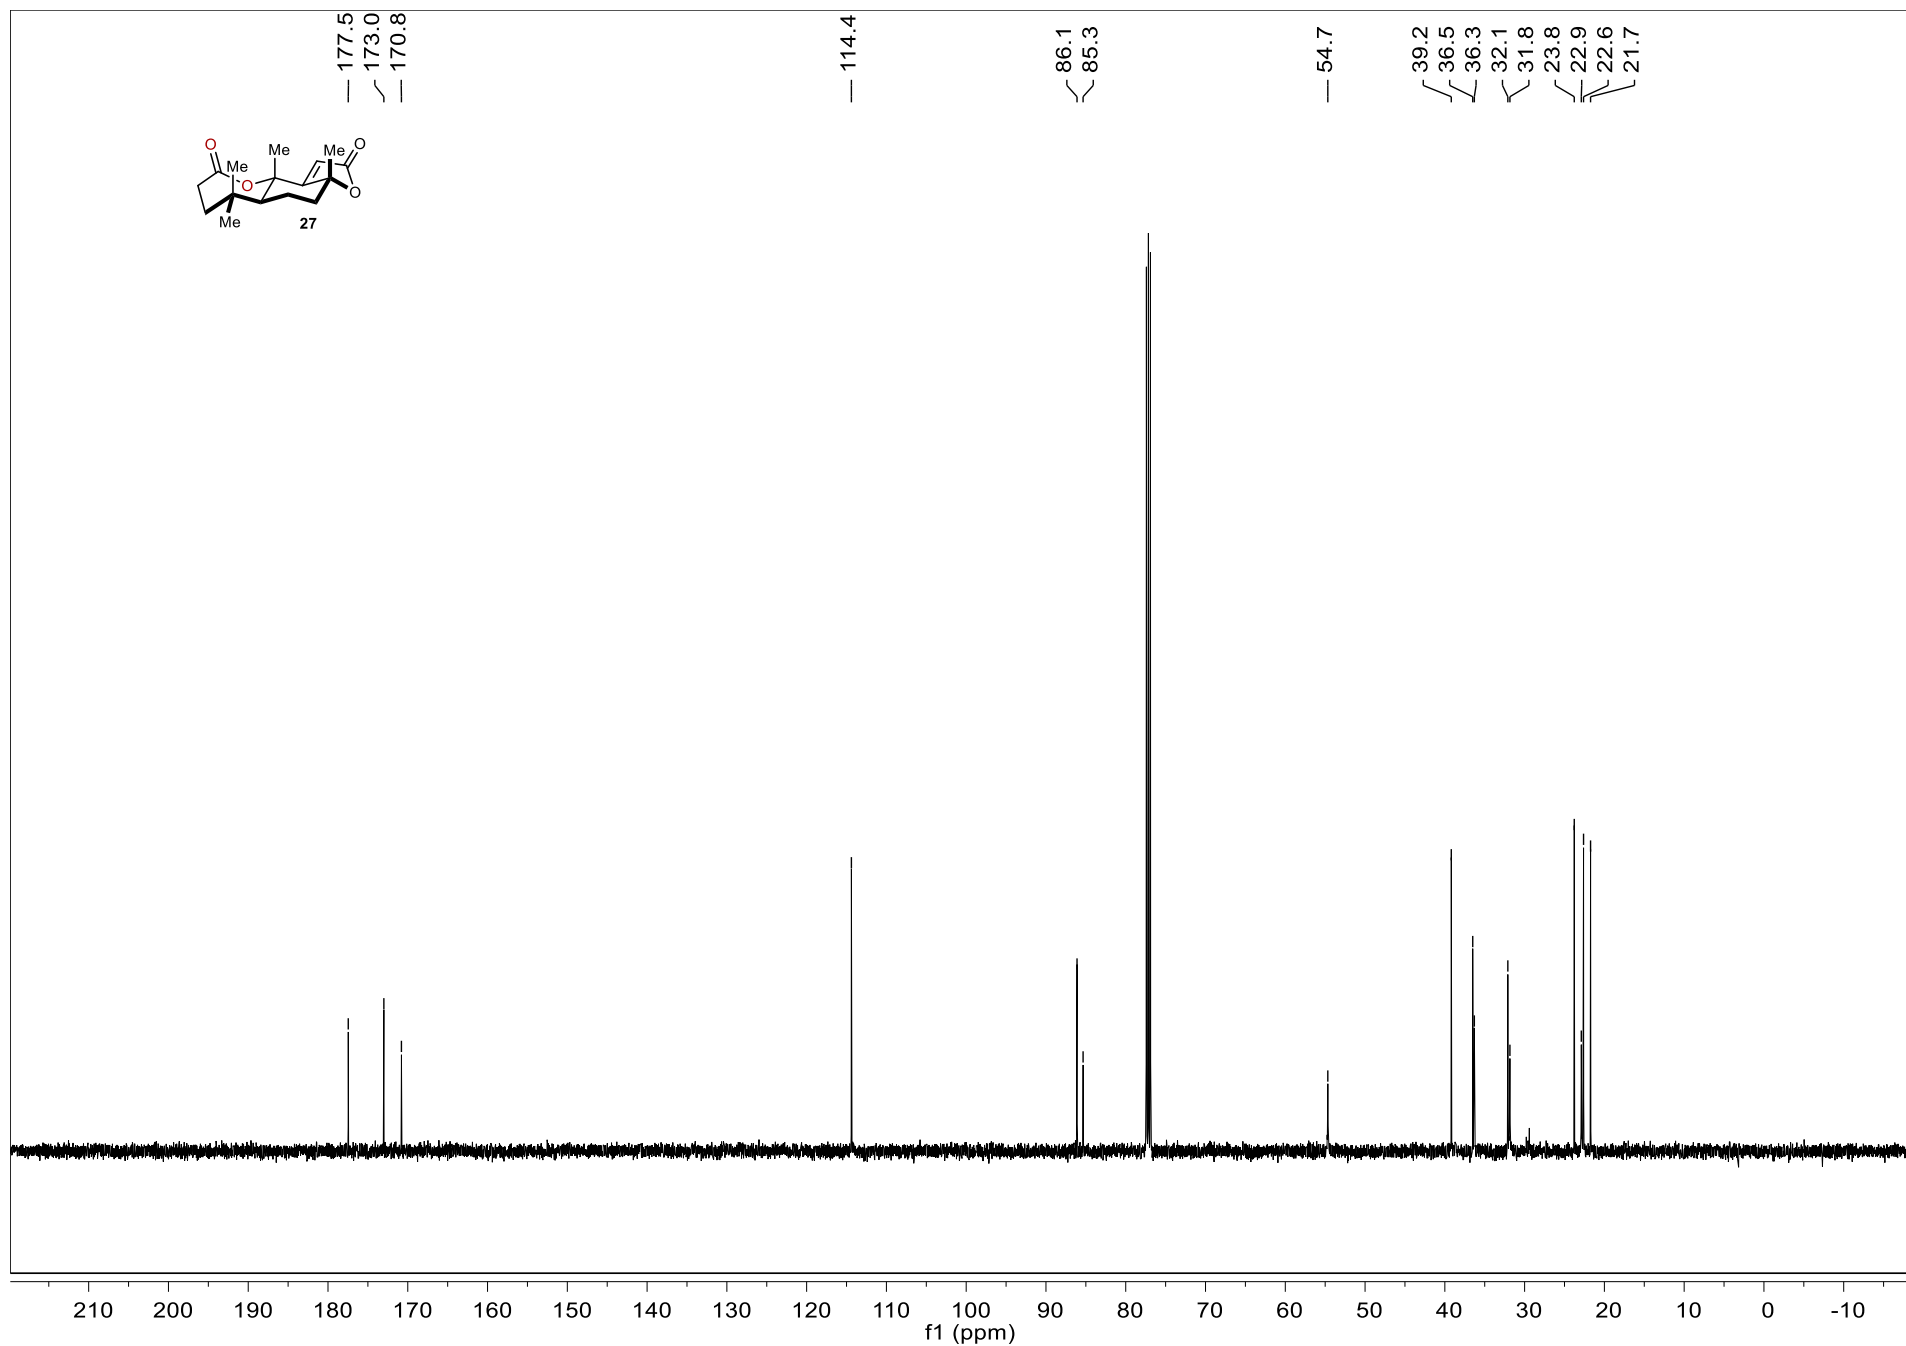

**$^1\text{H}$  NMR Spectrum of compound 28 (500 MHz,  $\text{CDCl}_3$ )**

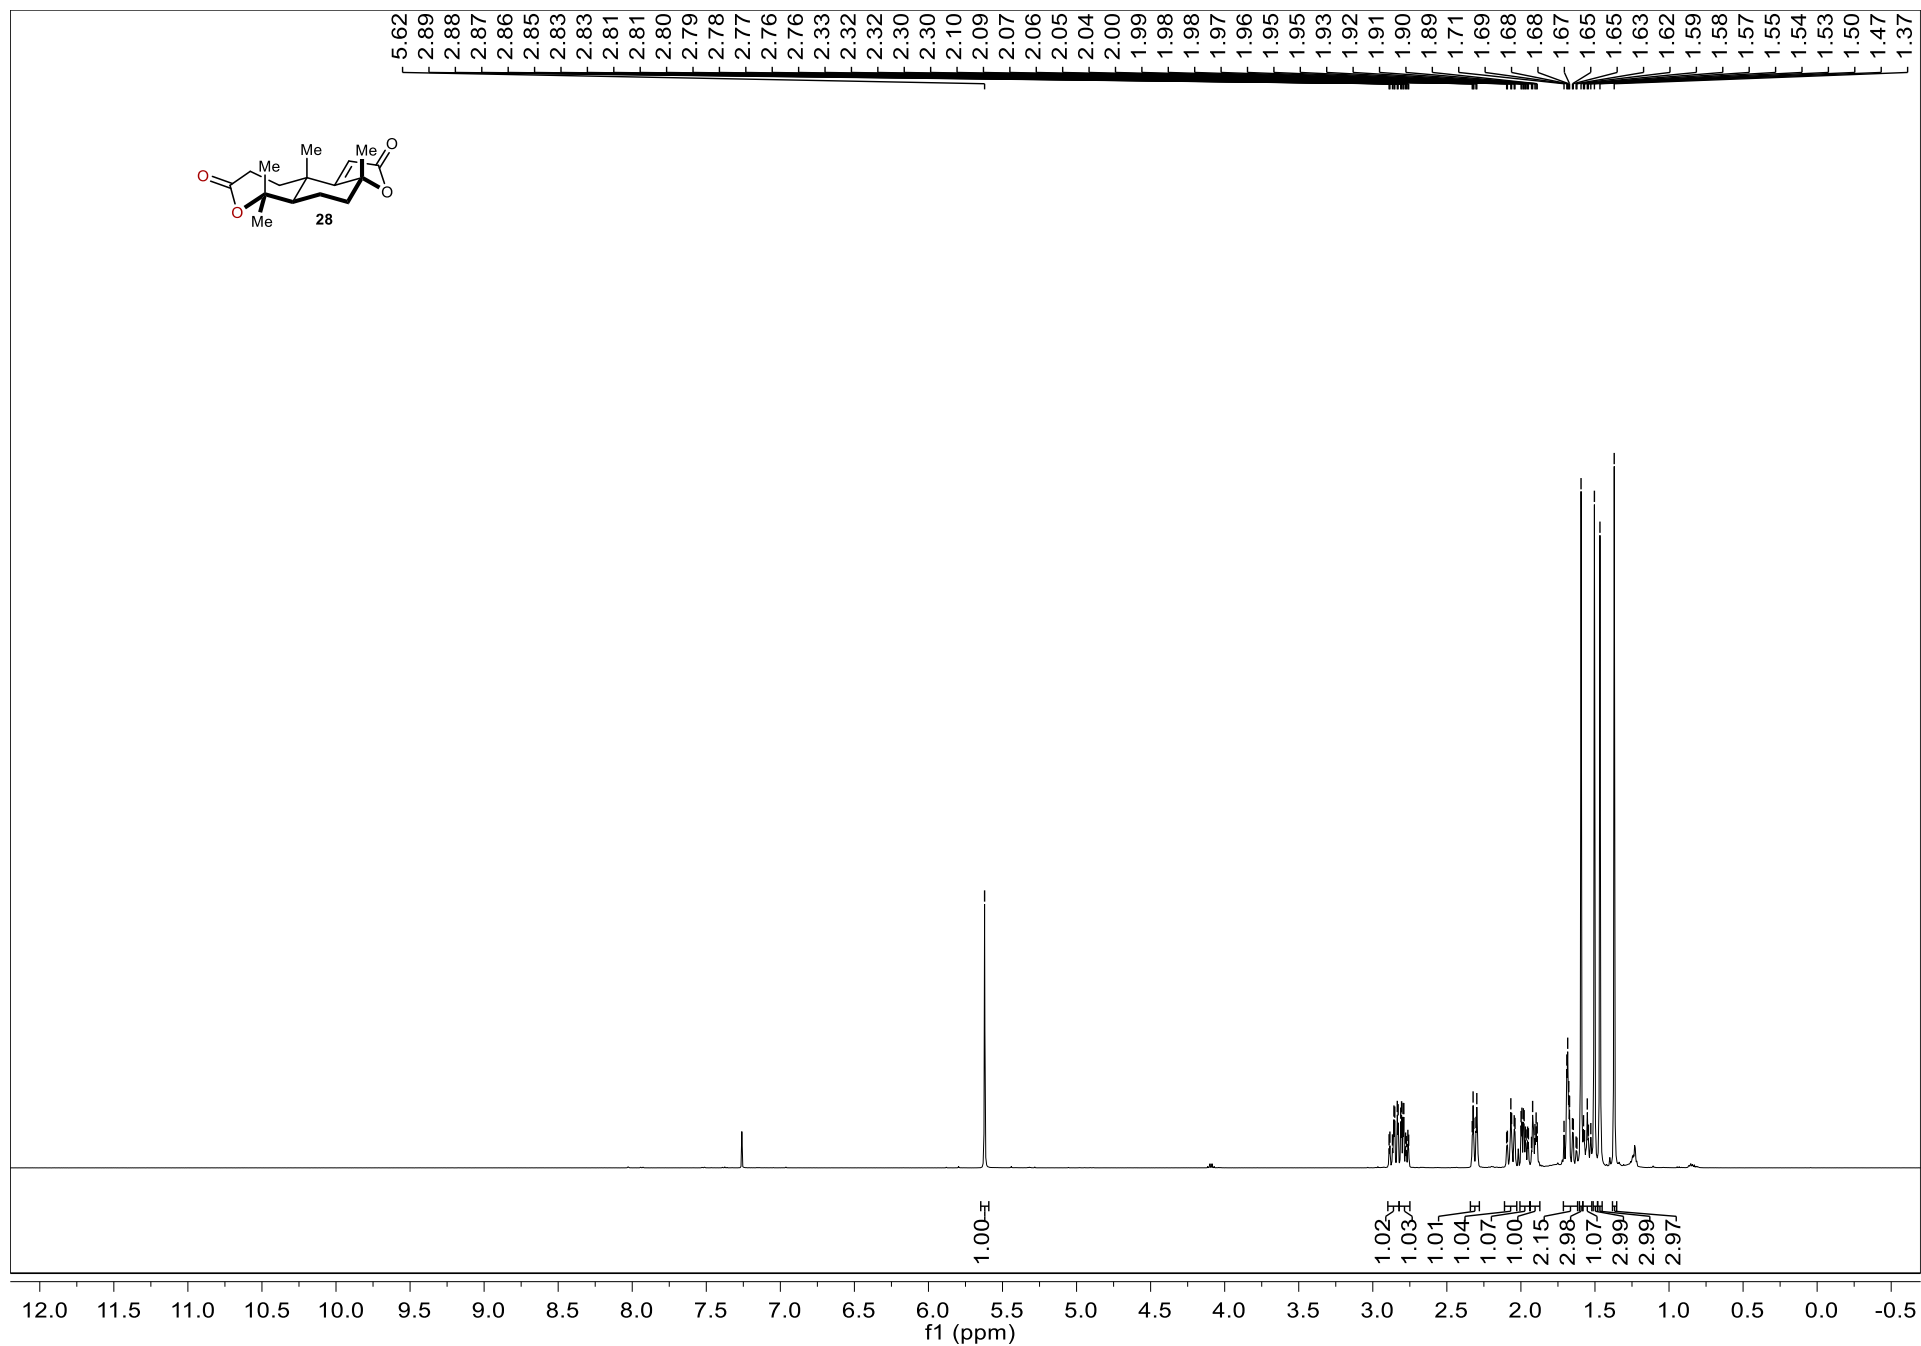

**$^{13}\text{C}$  NMR Spectrum of compound 28 (126 MHz,  $\text{CDCl}_3$ )**

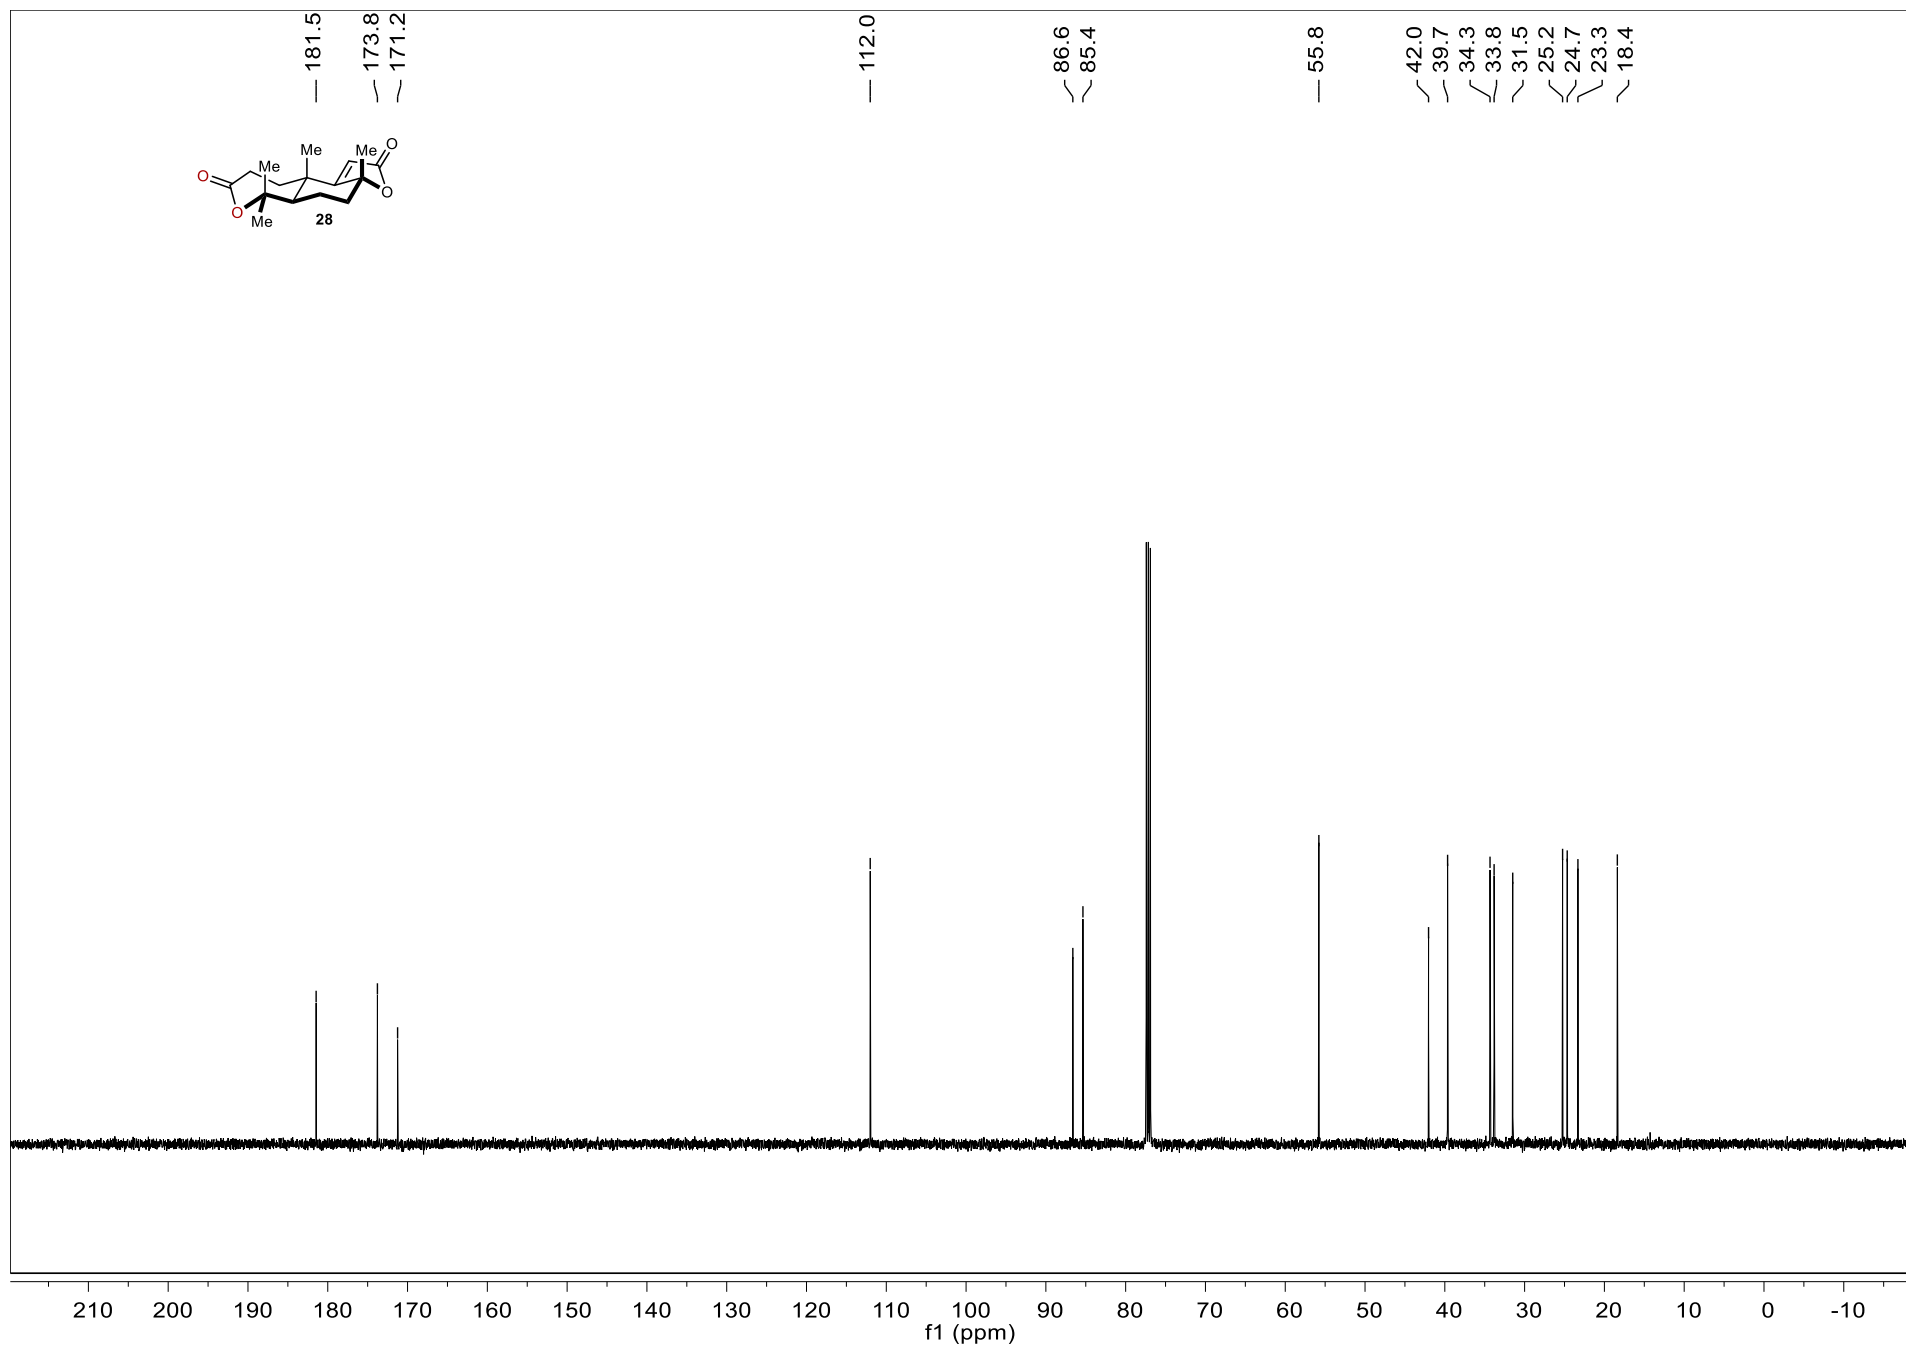



<sup>1</sup>H NMR Spectrum of compound S5 (500 MHz, CDCl<sub>3</sub>)

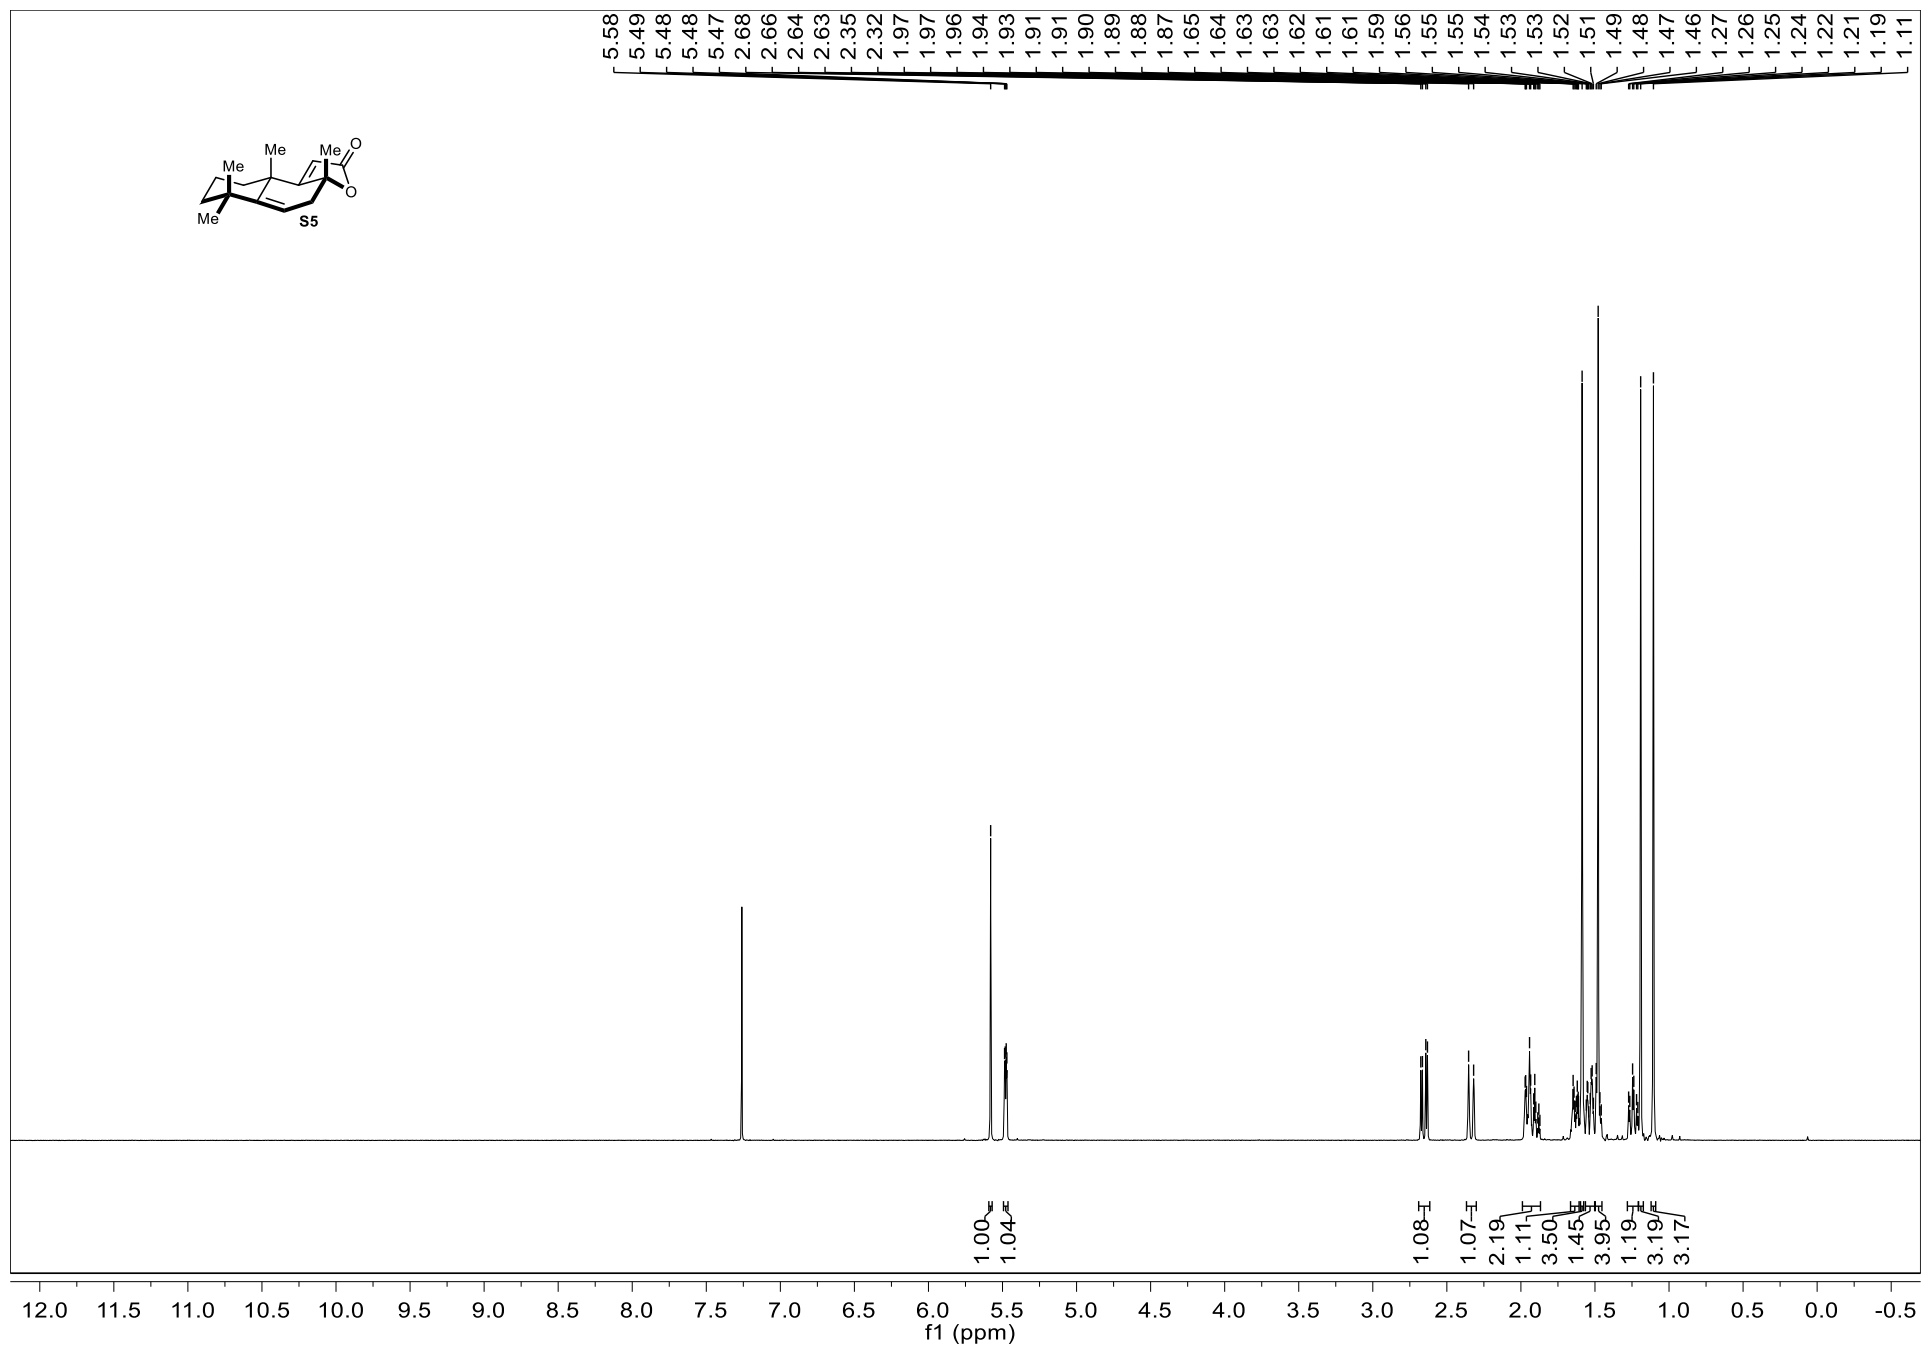

**$^{13}\text{C}$  NMR Spectrum of compound S5 (126 MHz,  $\text{CDCl}_3$ )**

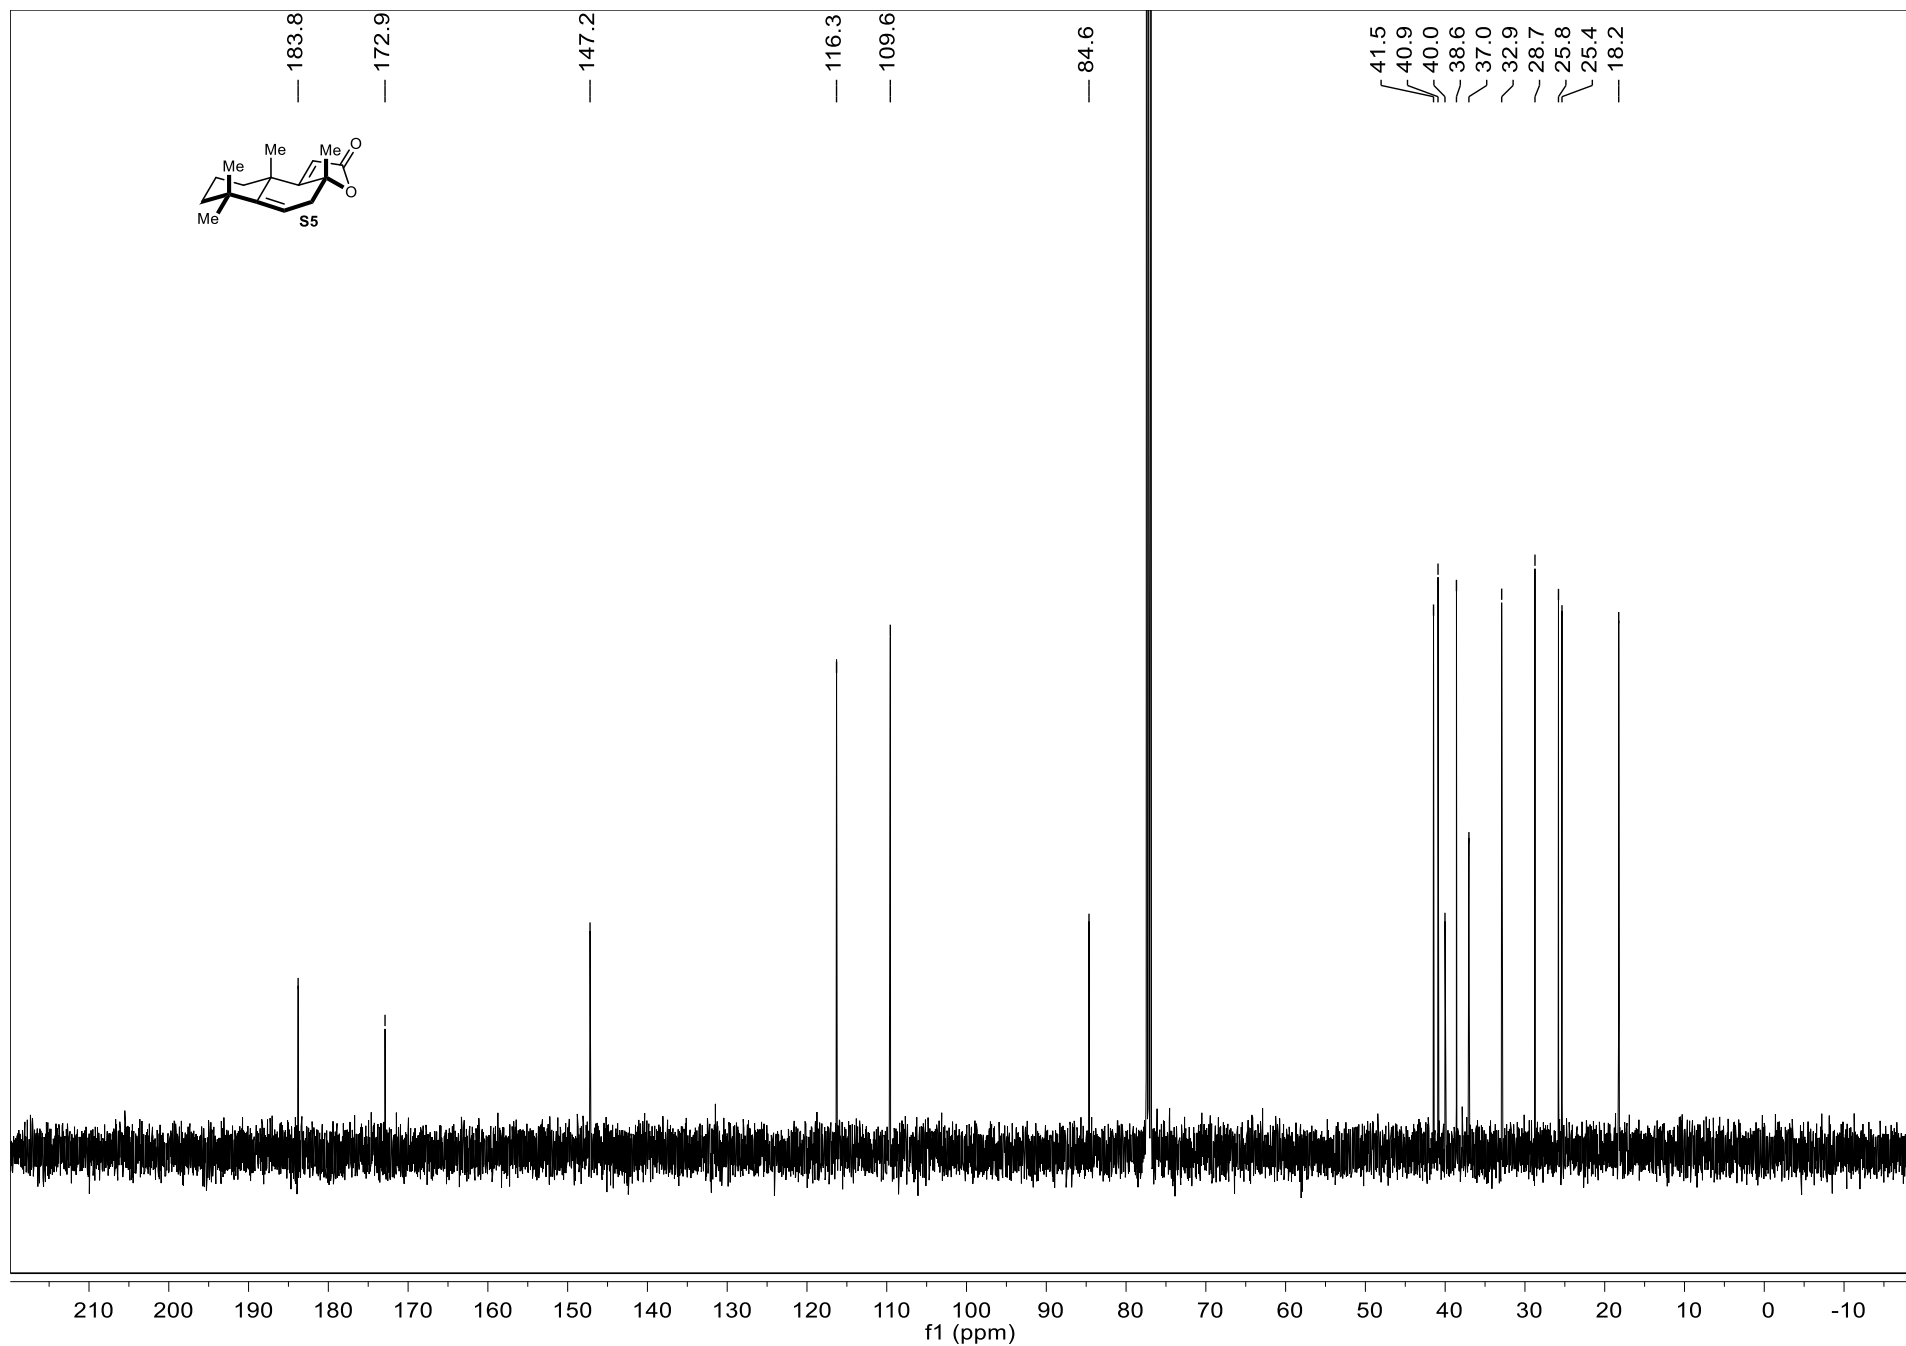

<sup>1</sup>H NMR Spectrum of compound 29 (500 MHz, CDCl<sub>3</sub>)

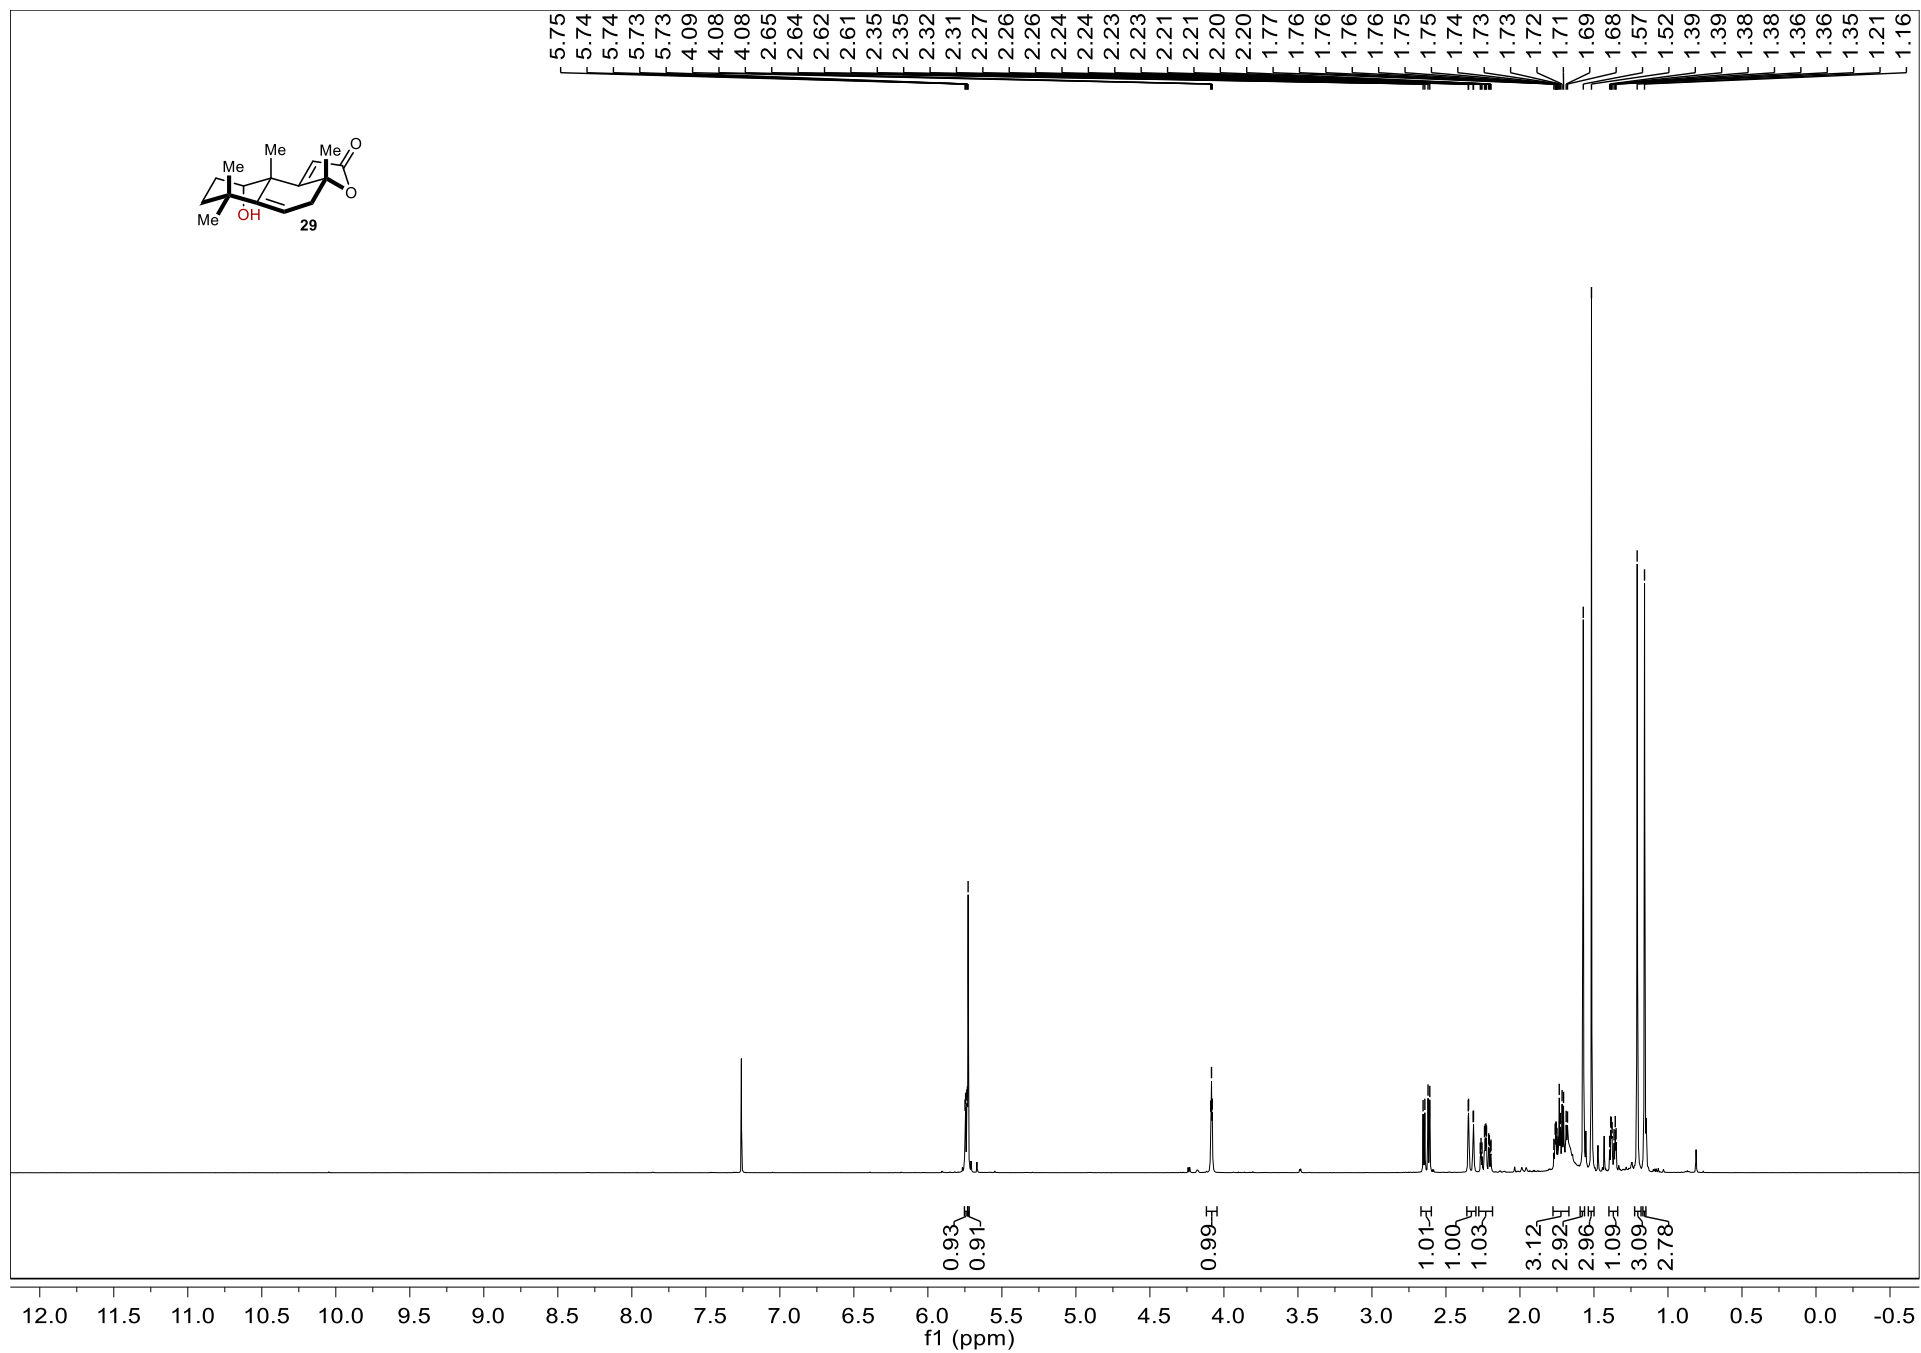

**$^{13}\text{C}$  NMR Spectrum of compound 29 (126 MHz,  $\text{CDCl}_3$ )**

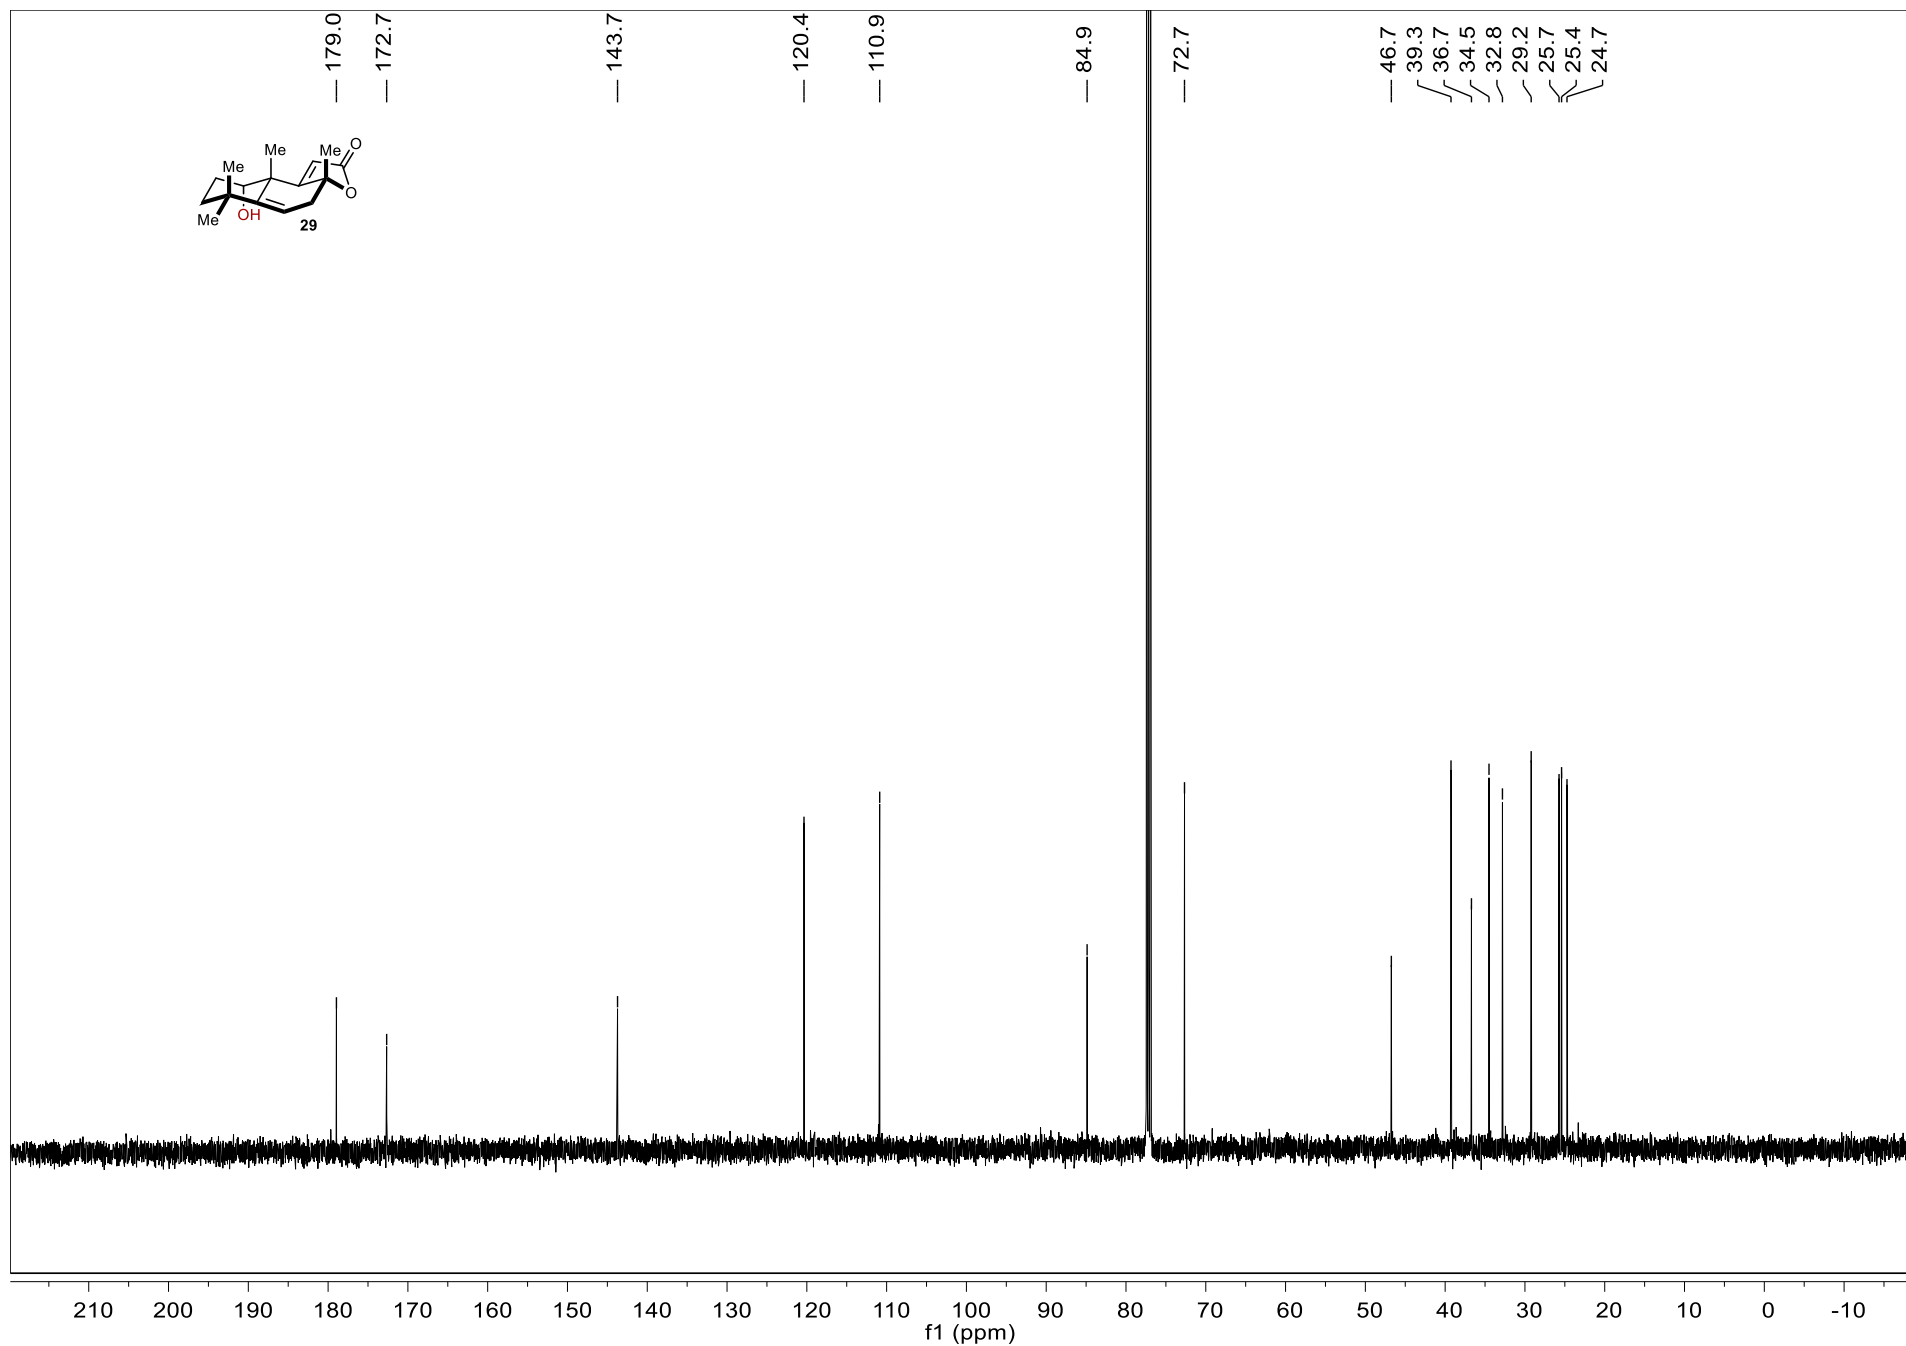

**<sup>1</sup>H NMR Spectrum of compound 30 (500 MHz, Methanol-*d*<sub>4</sub>)**

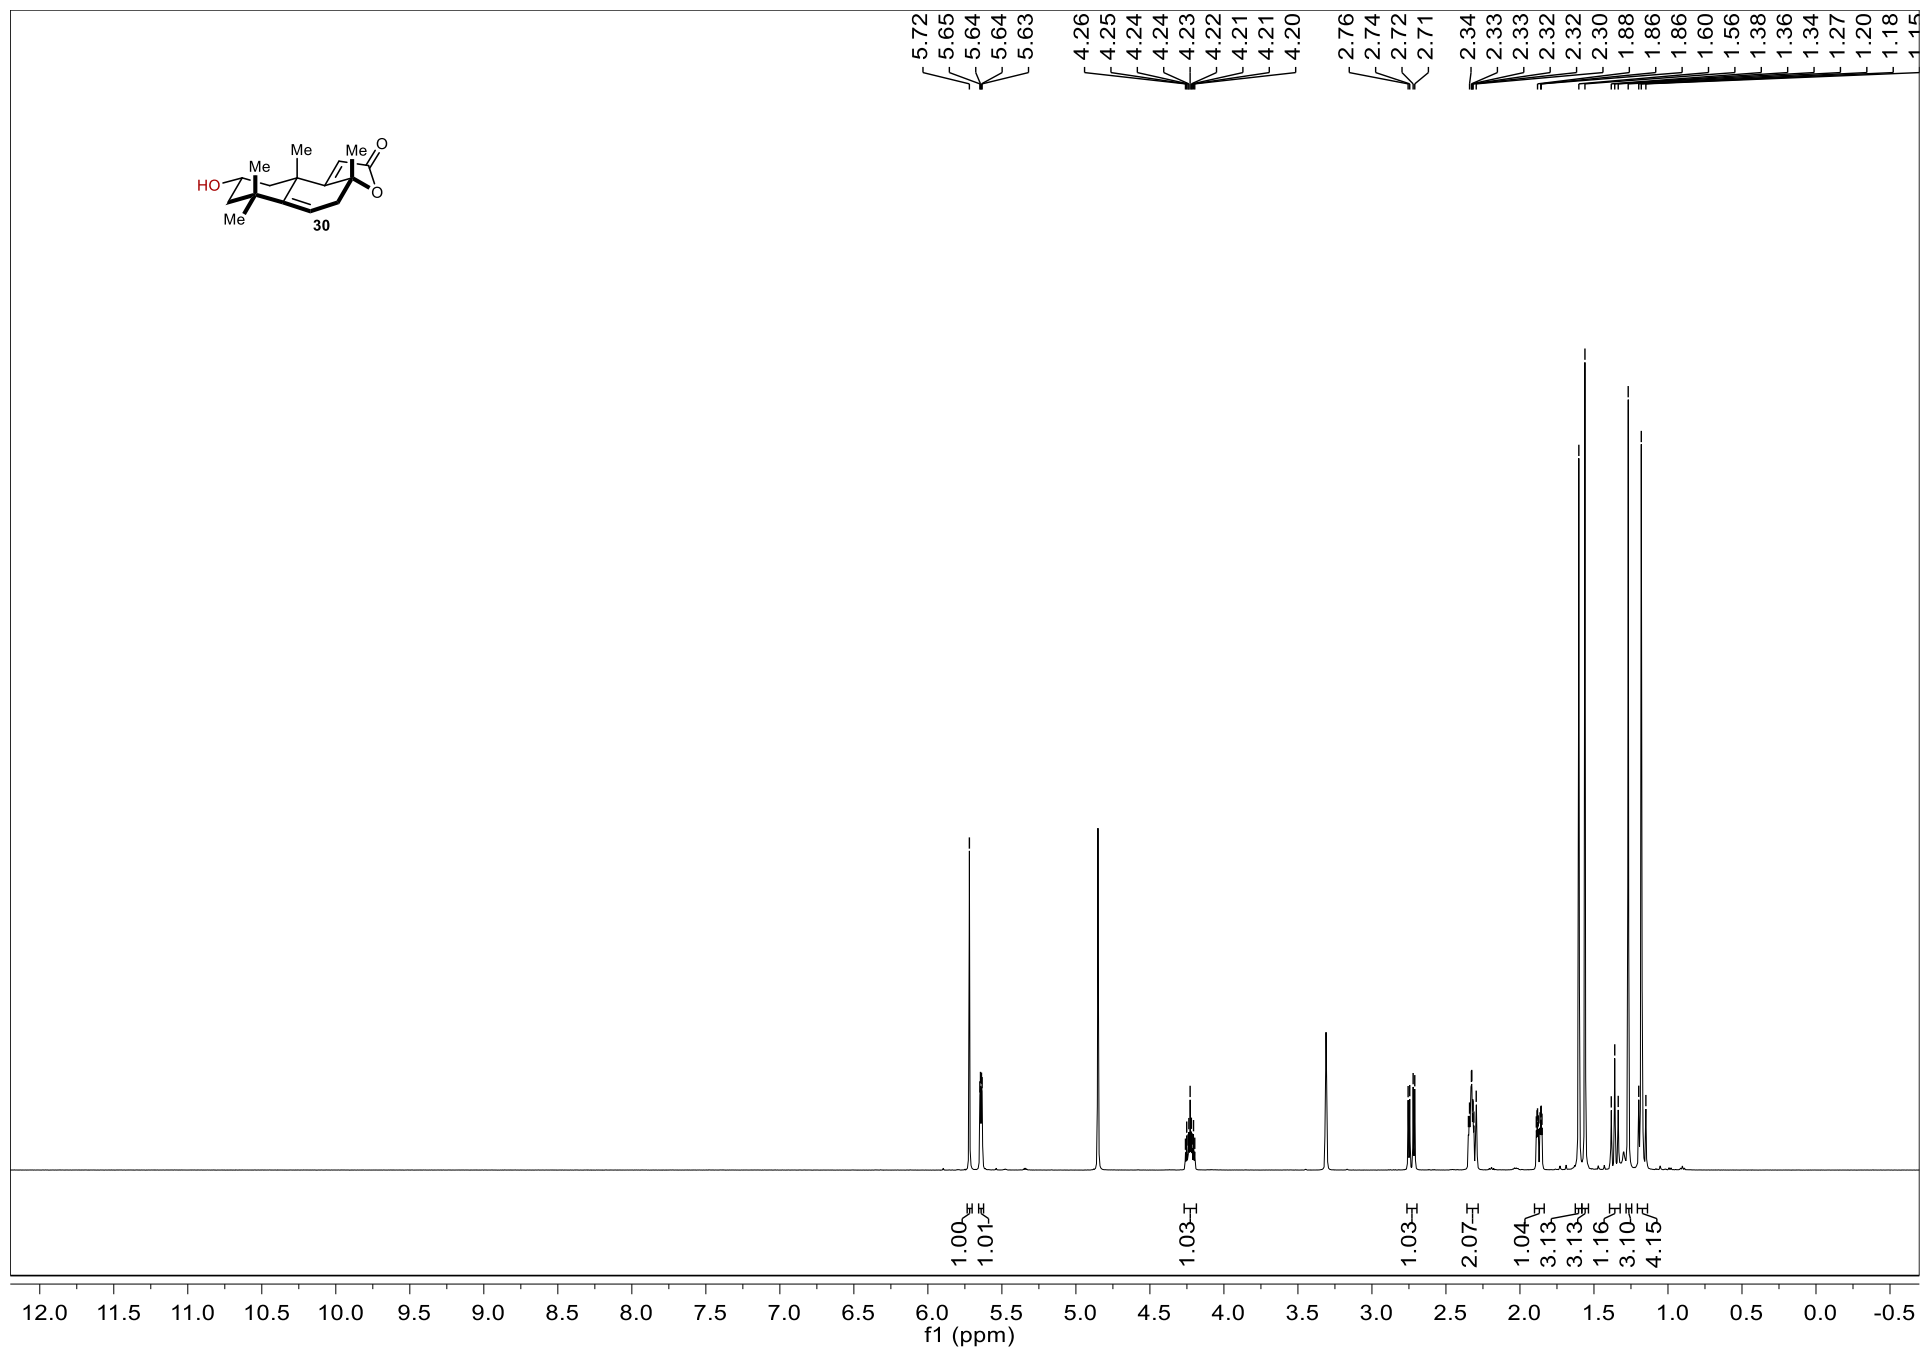

**$^{13}\text{C}$  NMR Spectrum of compound 30 (126 MHz, Methanol- $d_4$ )**

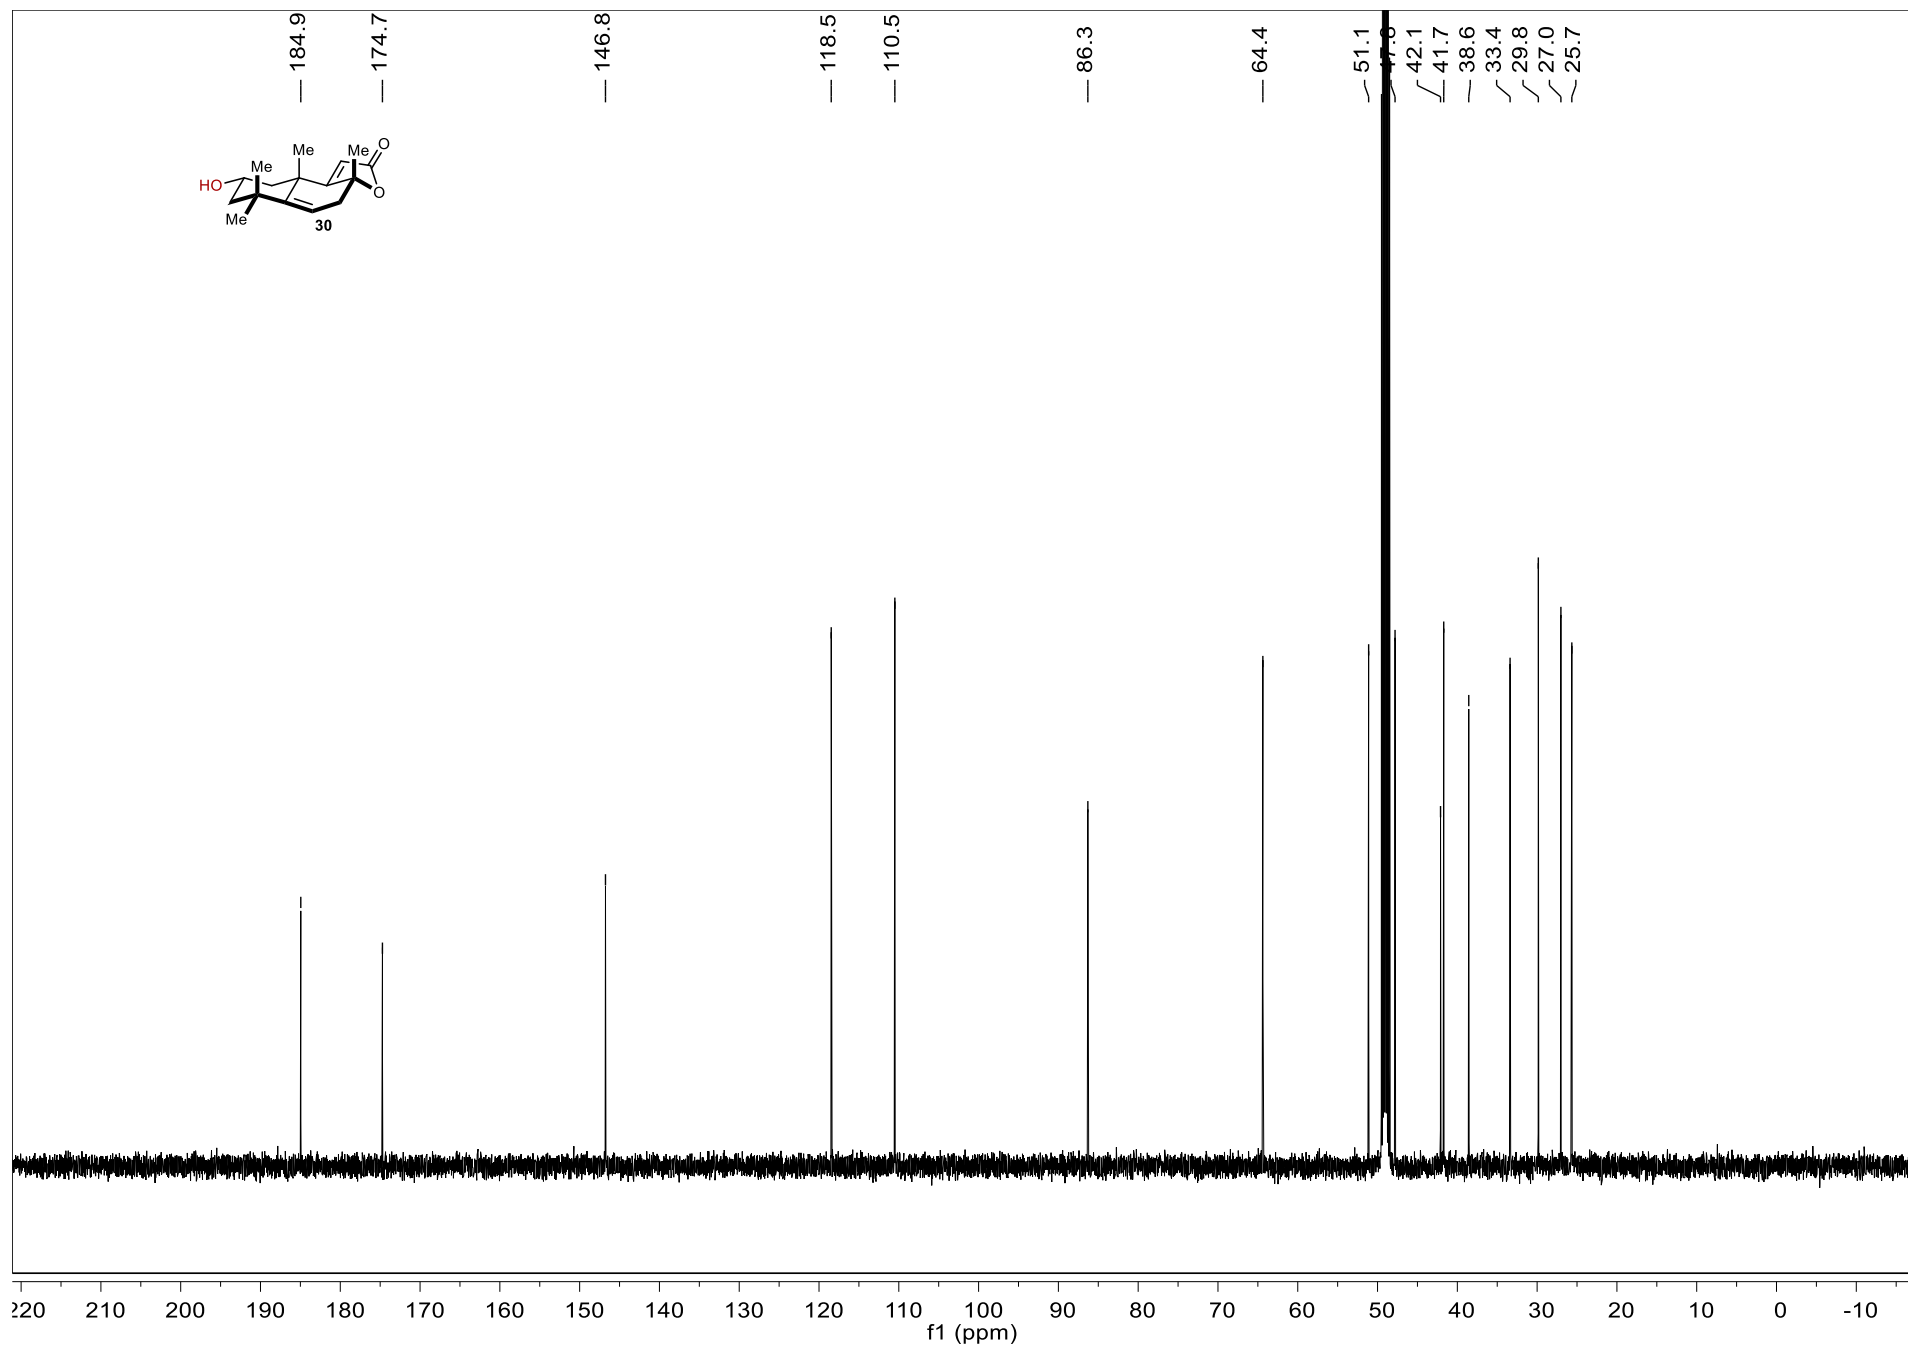

**<sup>1</sup>H NMR Spectrum of compound 31 (500 MHz, Methanol-*d*<sub>4</sub>)**

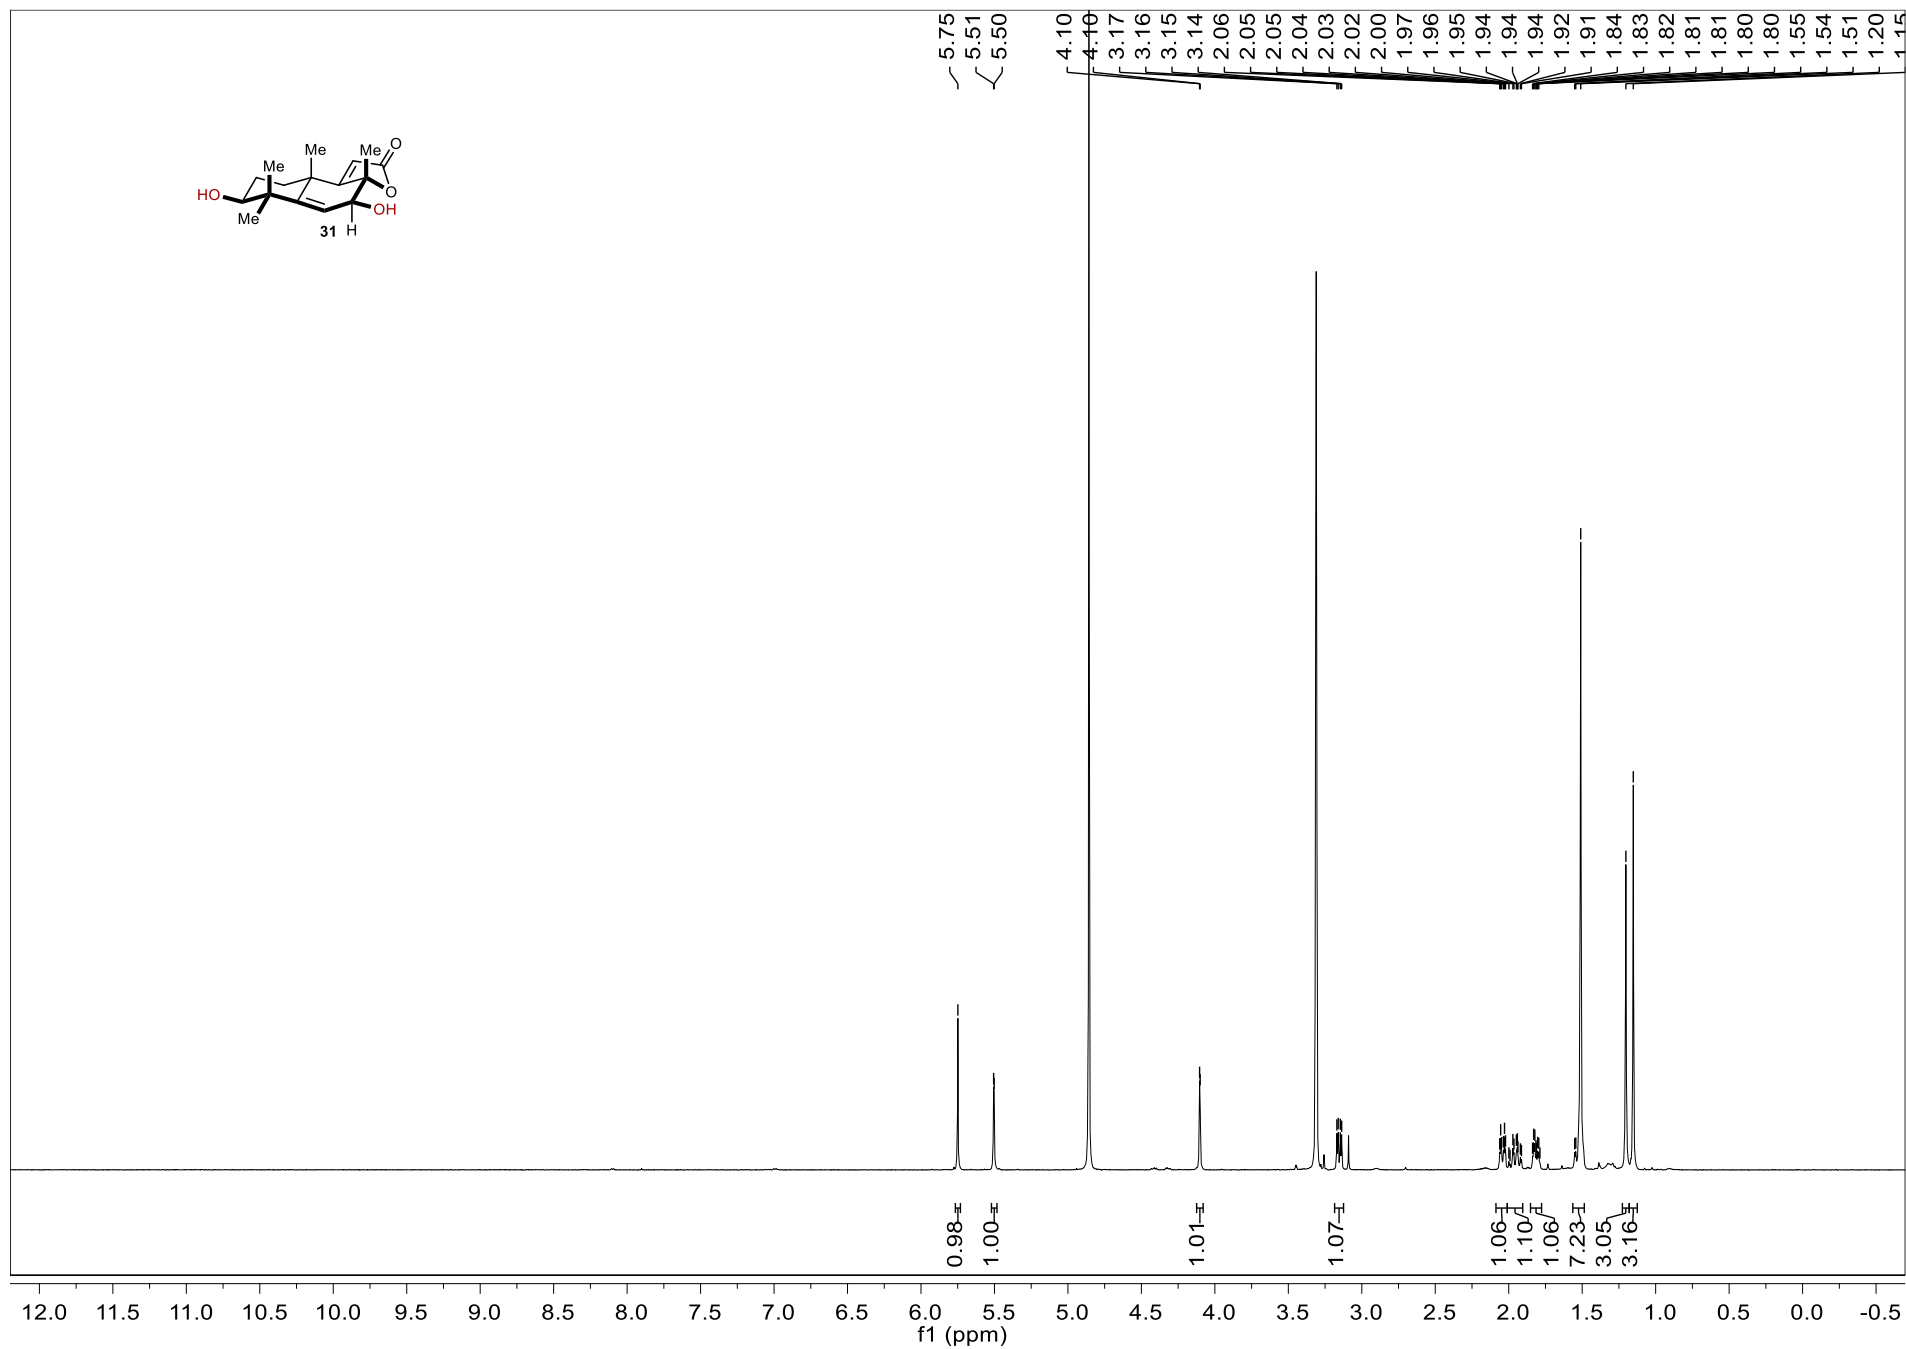

**<sup>13</sup>C NMR Spectrum of compound 31 (126 MHz, Methanol-*d*<sub>4</sub>)**

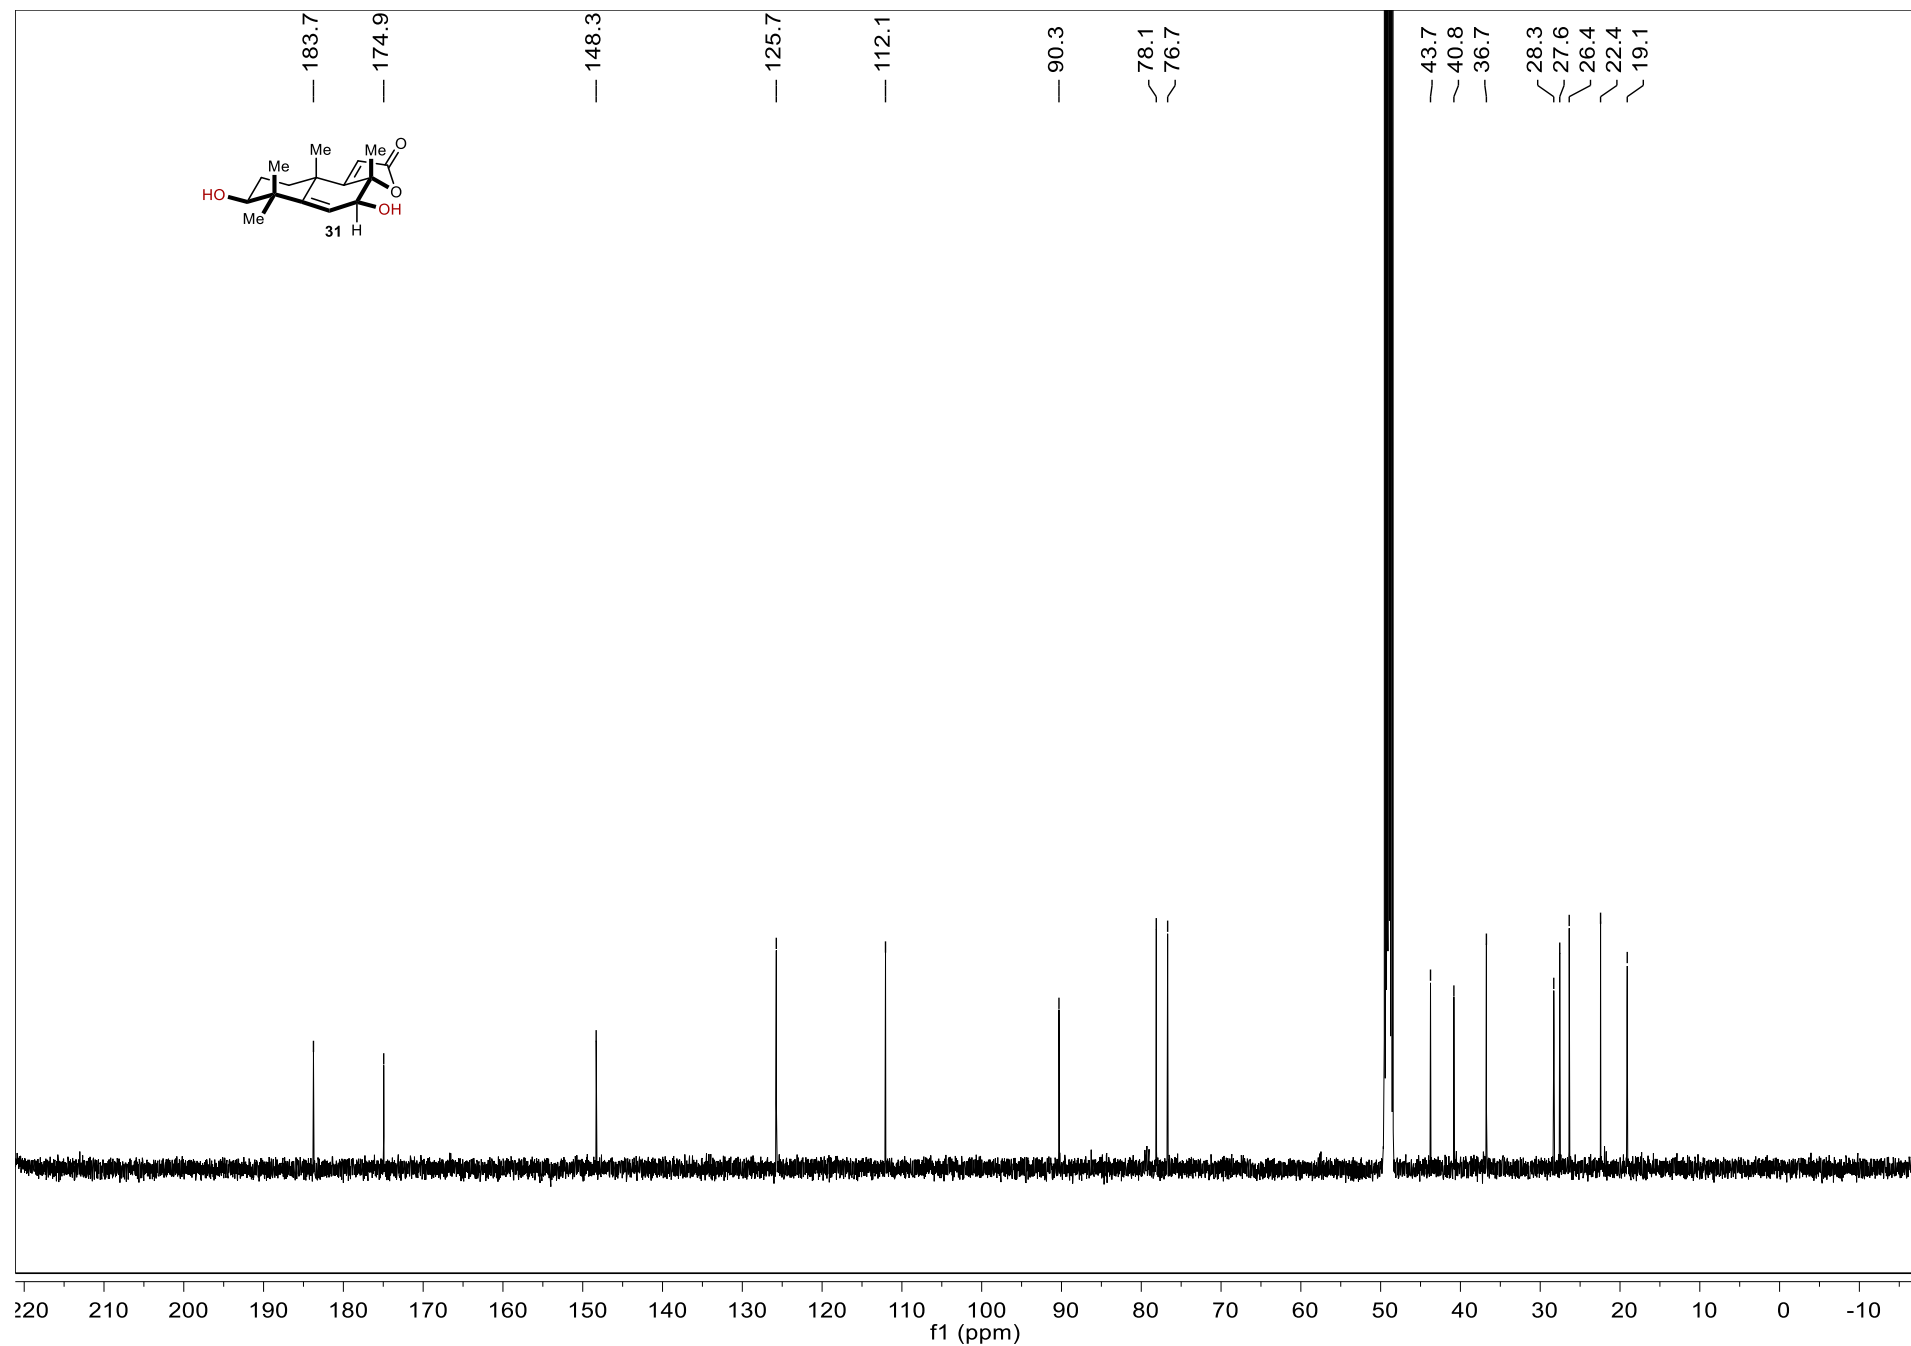



**<sup>1</sup>H NMR Spectrum of compound S6 (500 MHz, Methanol-d<sub>4</sub>)**

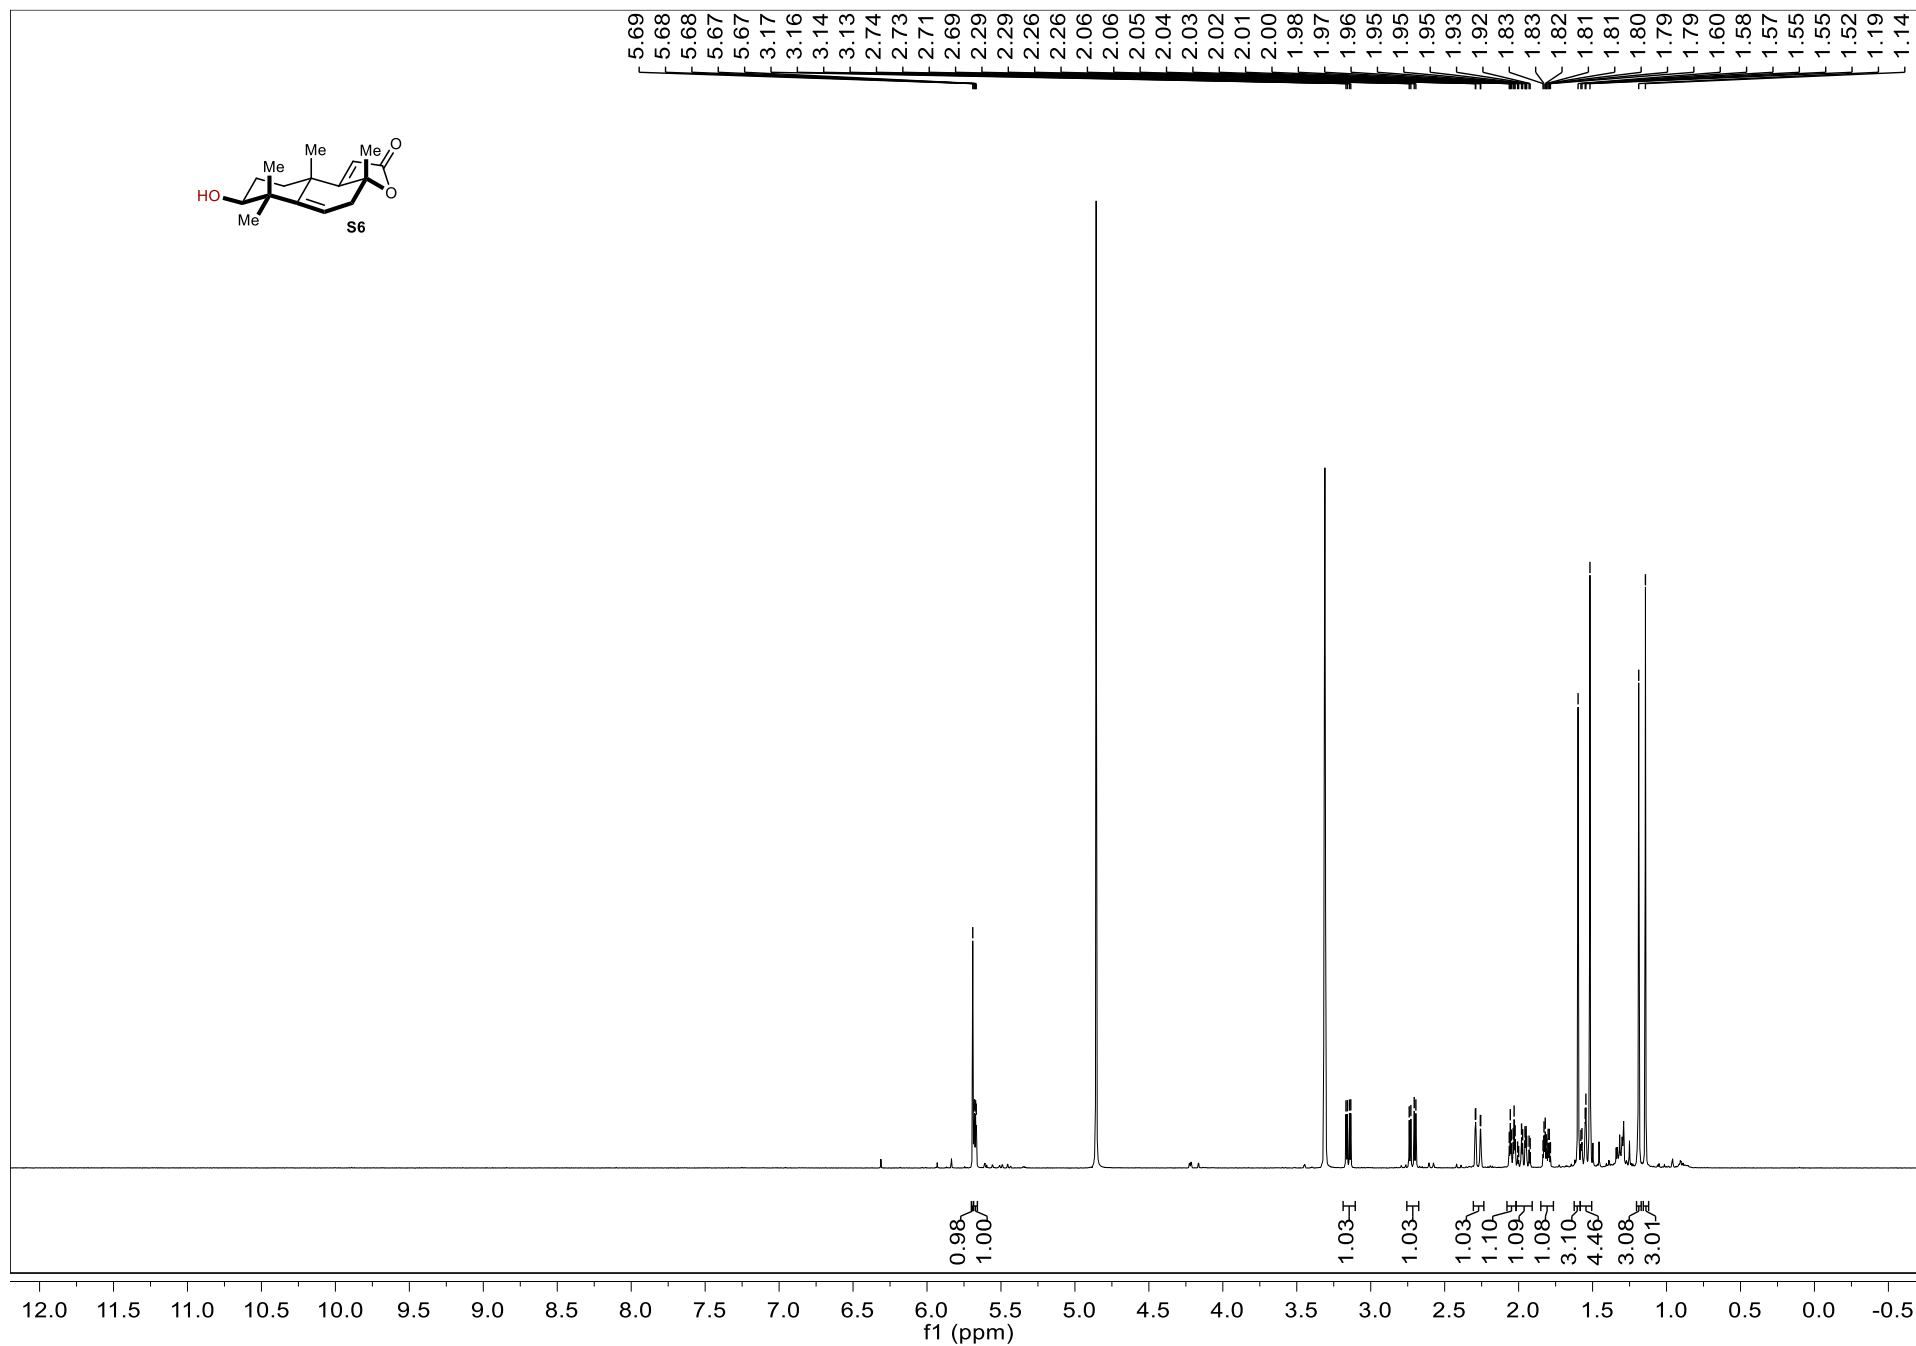

**<sup>13</sup>C NMR Spectrum of compound S6 (126 MHz, Methanol-d<sub>4</sub>)**

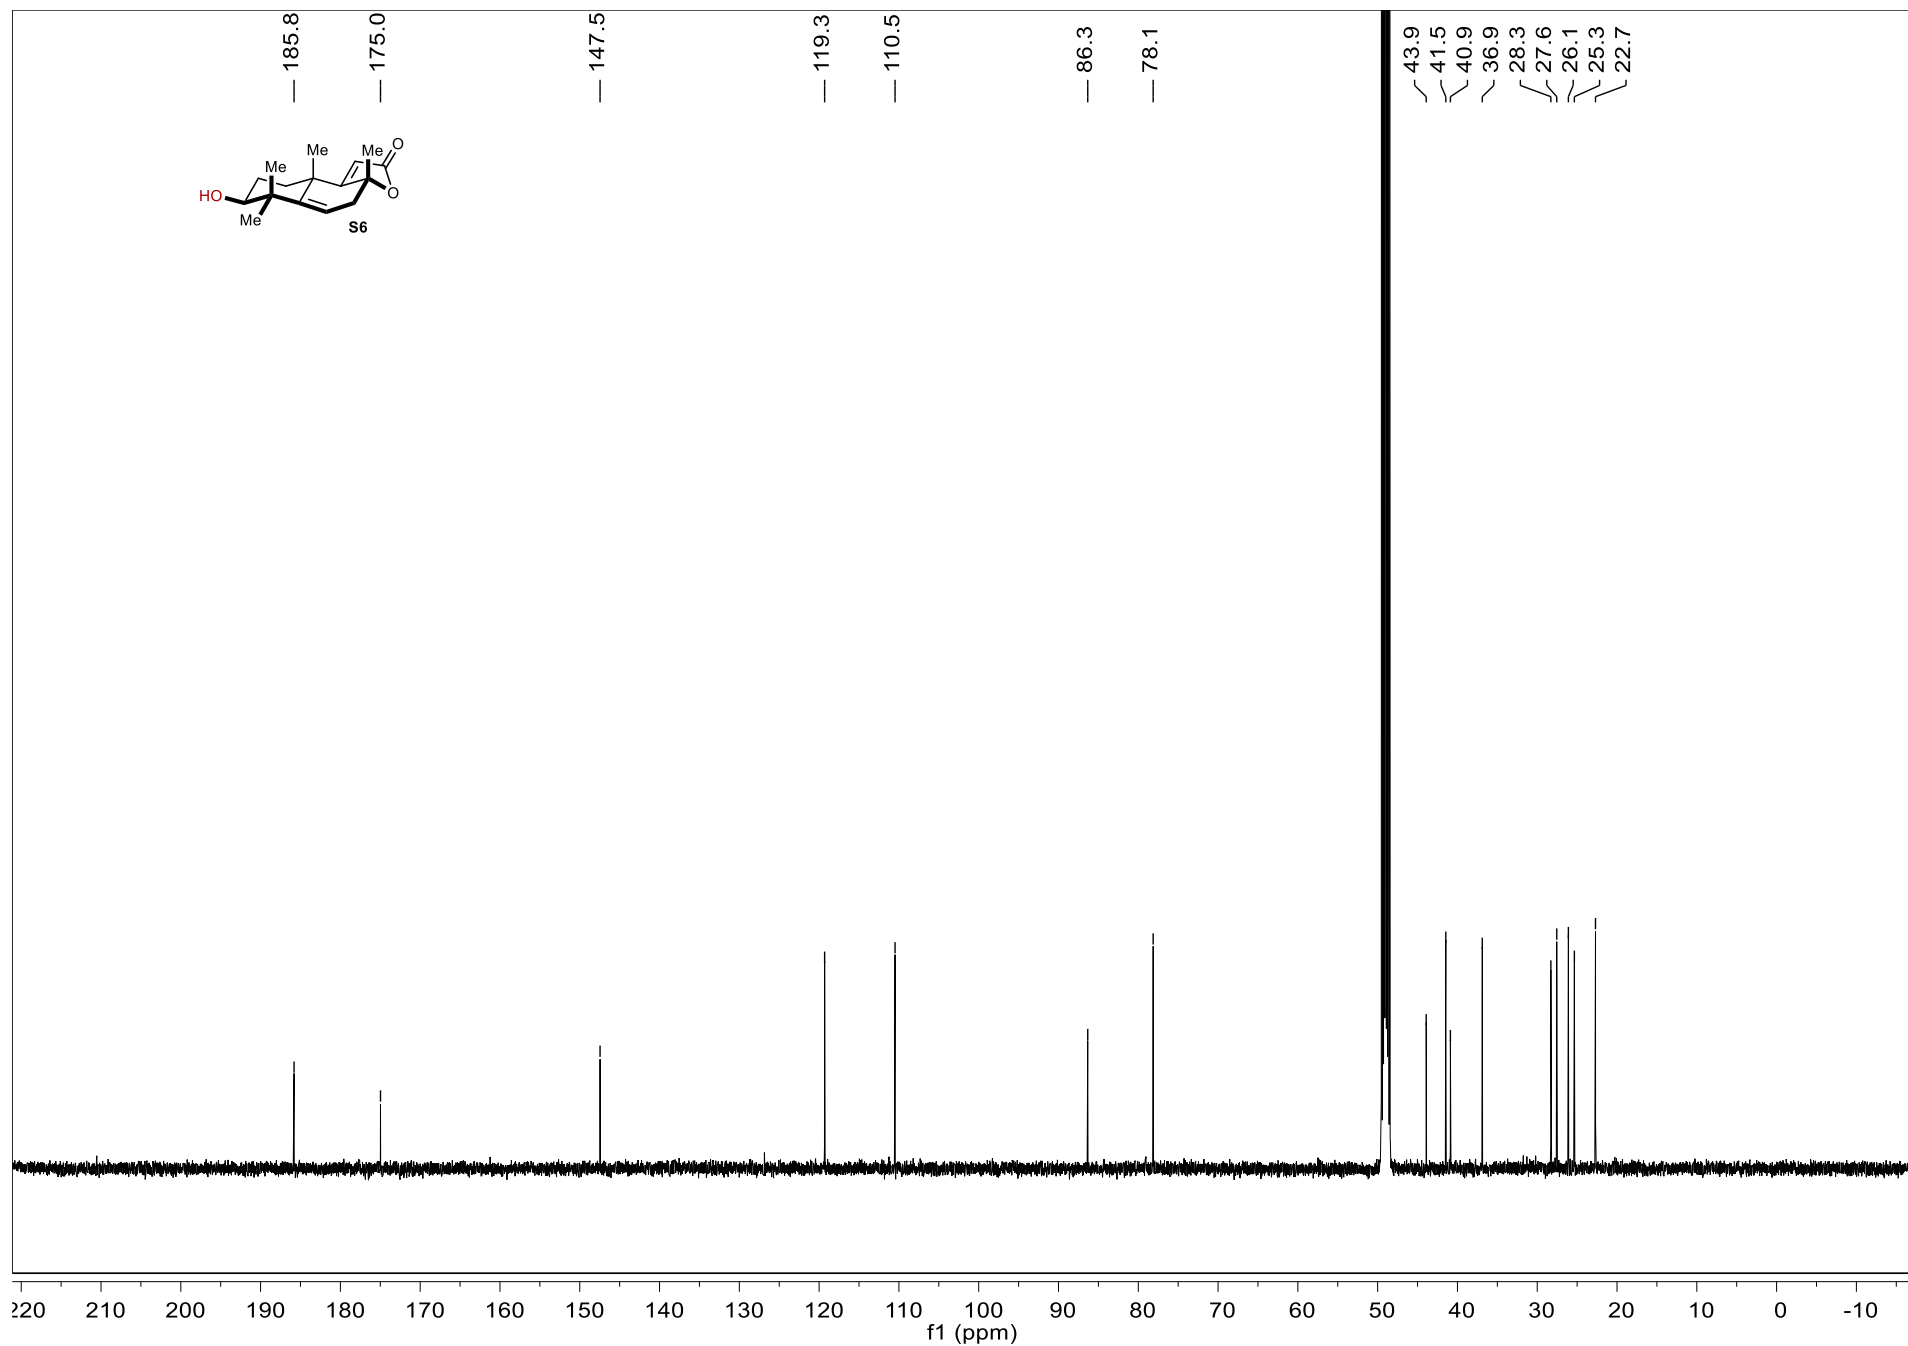

**$^1\text{H}$  NMR Spectrum of compound 32 (500 MHz,  $\text{CDCl}_3$ )**

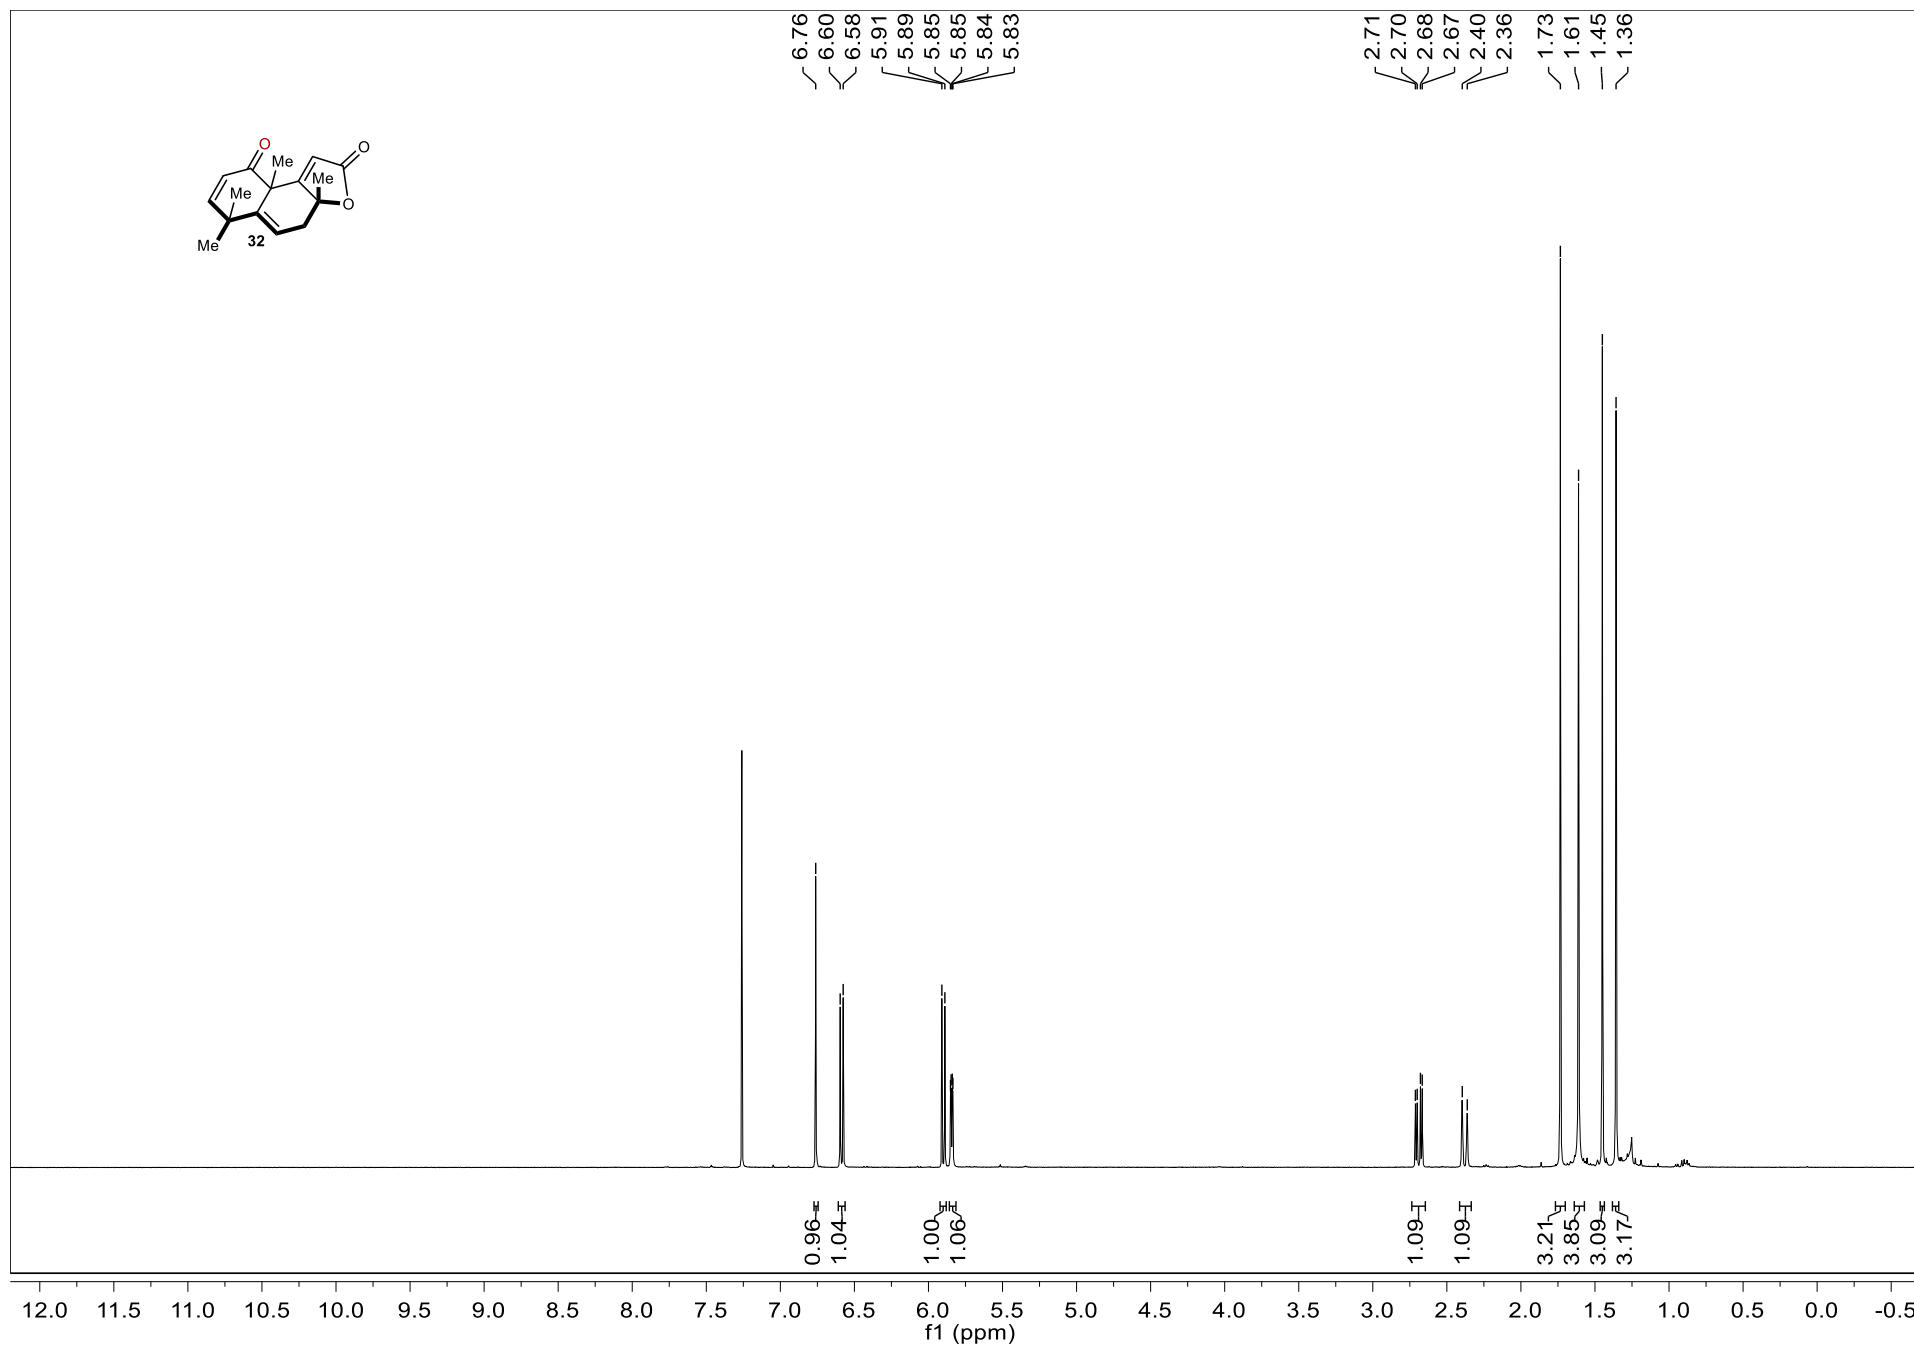

**$^{13}\text{C}$  NMR Spectrum of compound 32 (126 MHz,  $\text{CDCl}_3$ )**

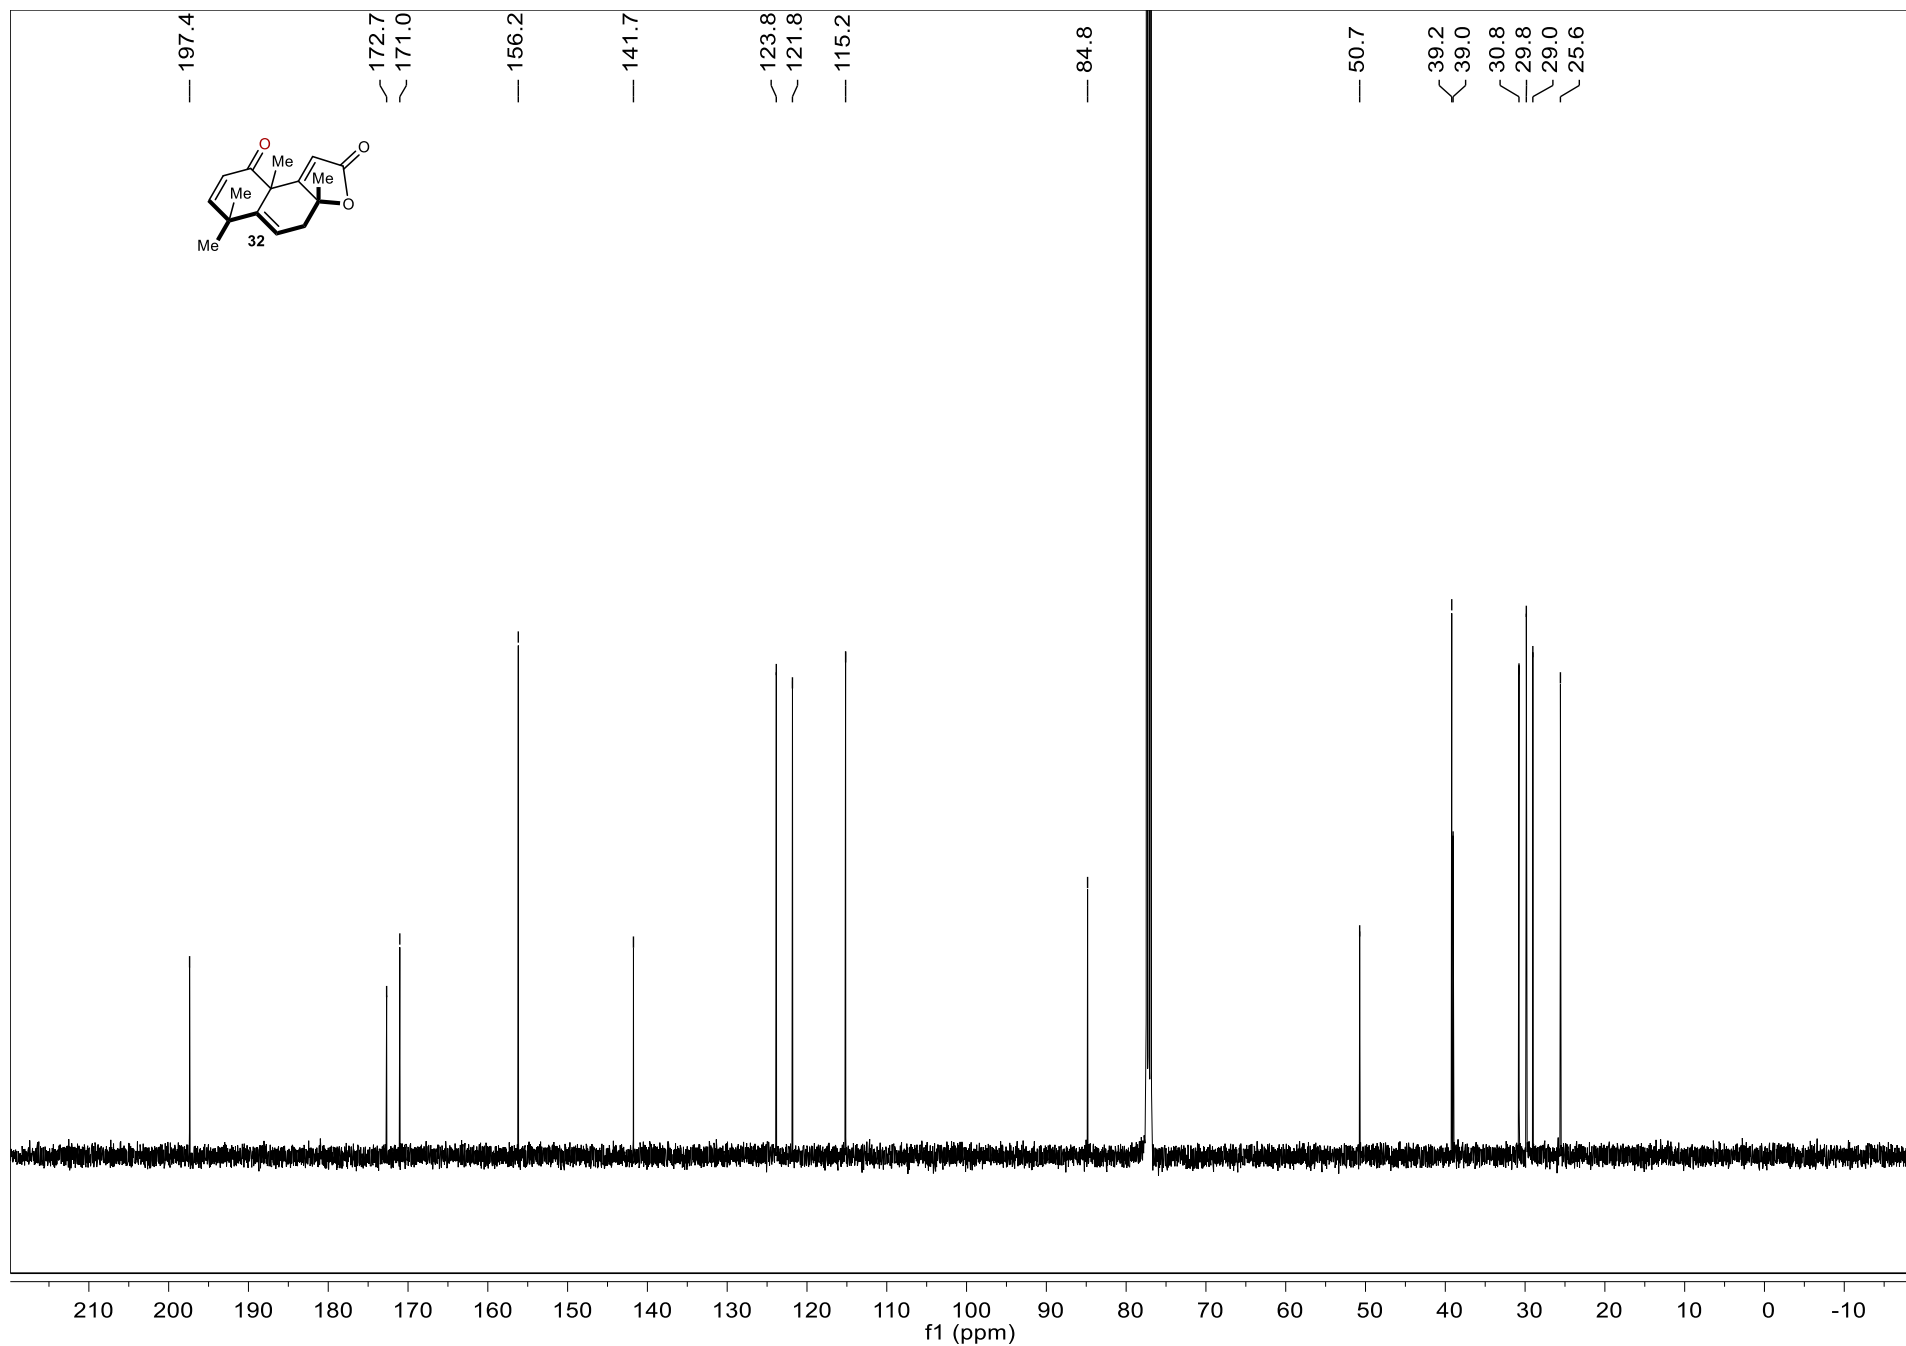

**<sup>1</sup>H NMR Spectrum of compound 33 (500 MHz, CDCl<sub>3</sub>)**

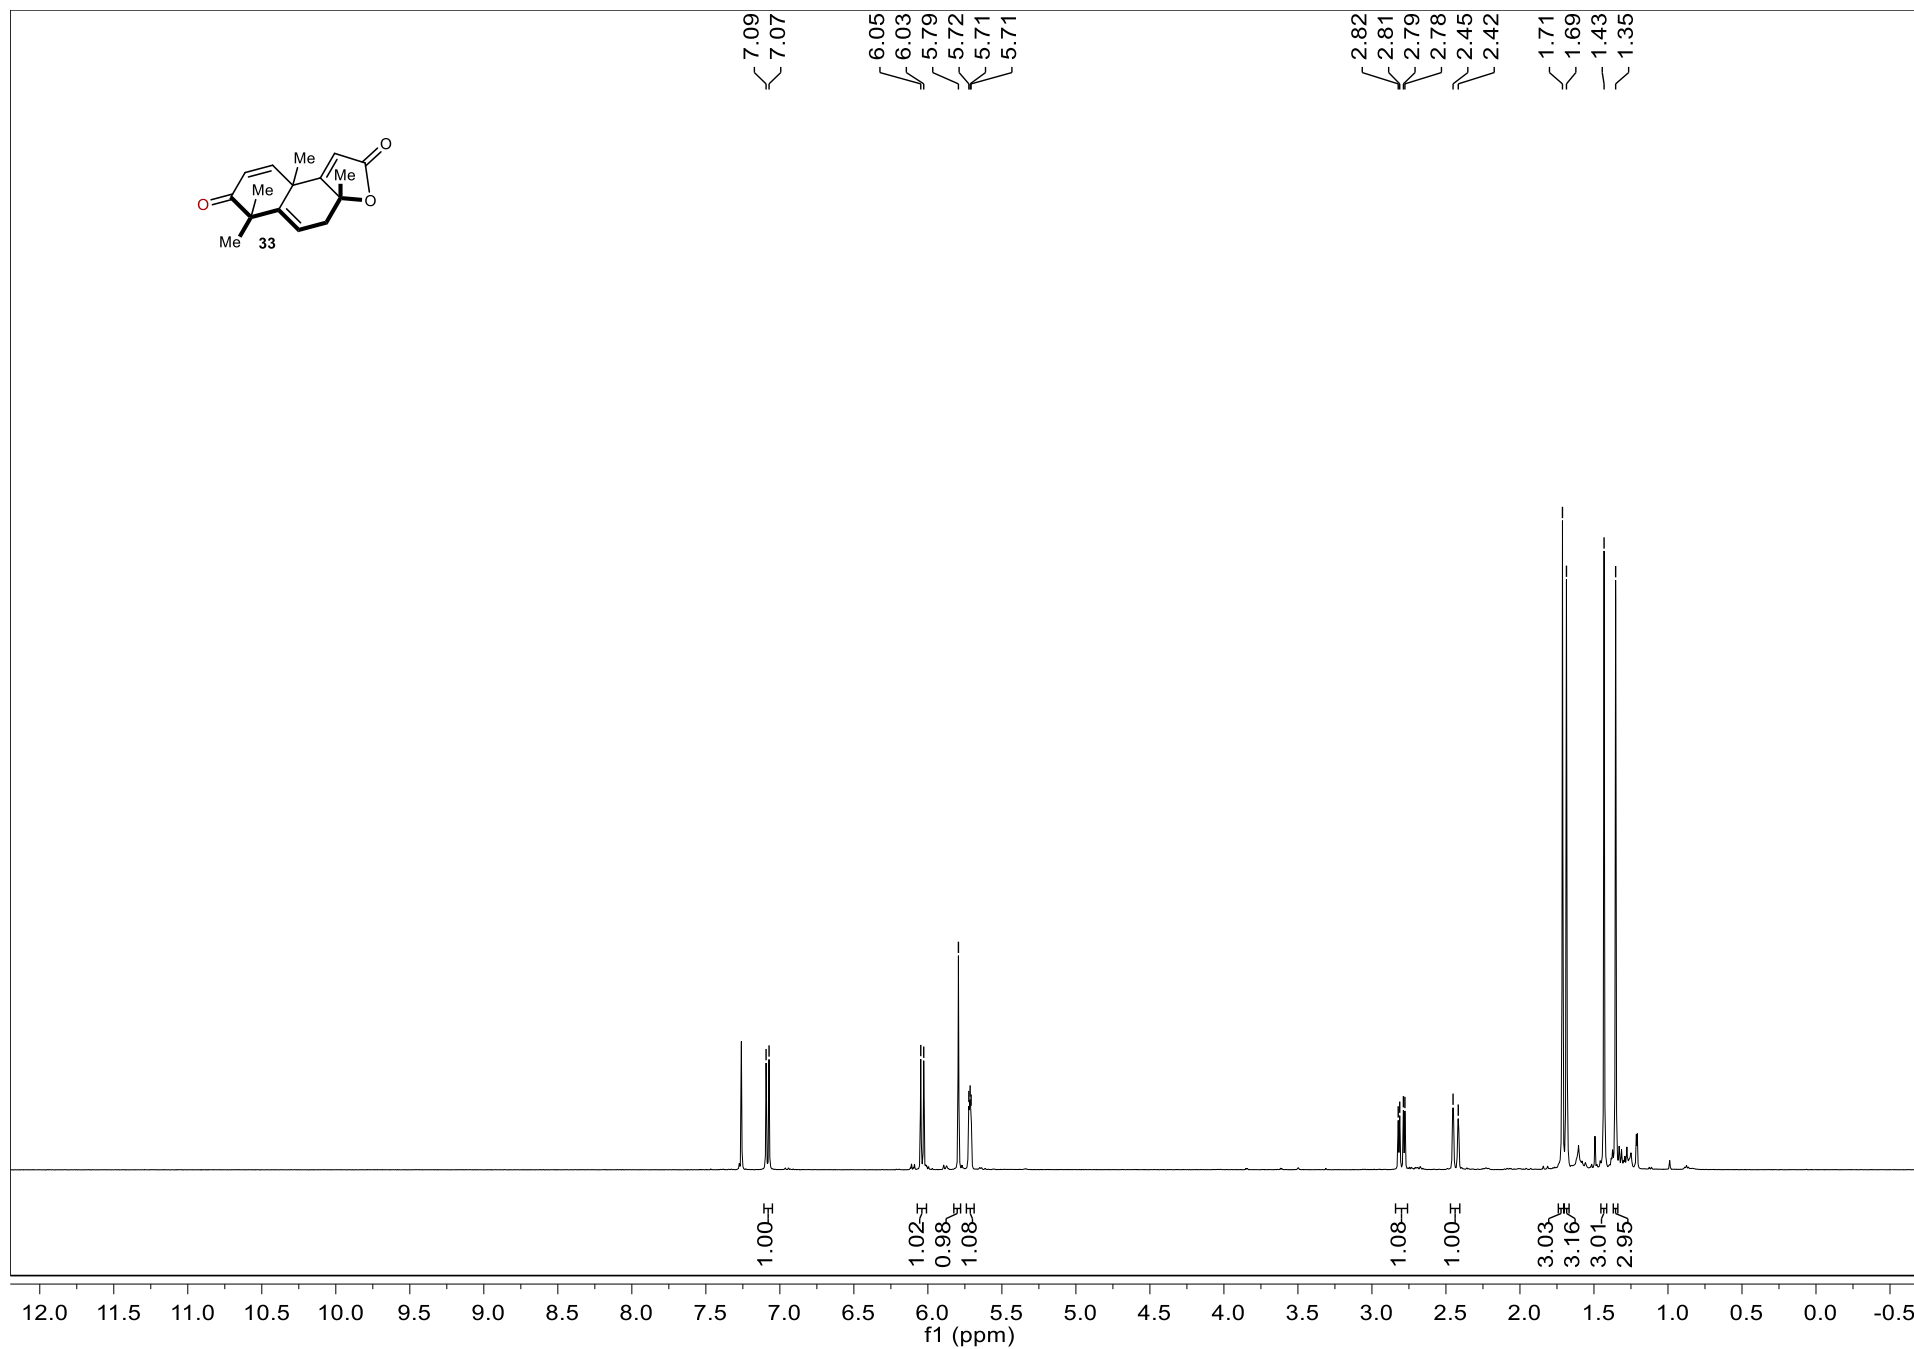

**$^{13}\text{C}$  NMR Spectrum of compound 33 (126 MHz,  $\text{CDCl}_3$ )**

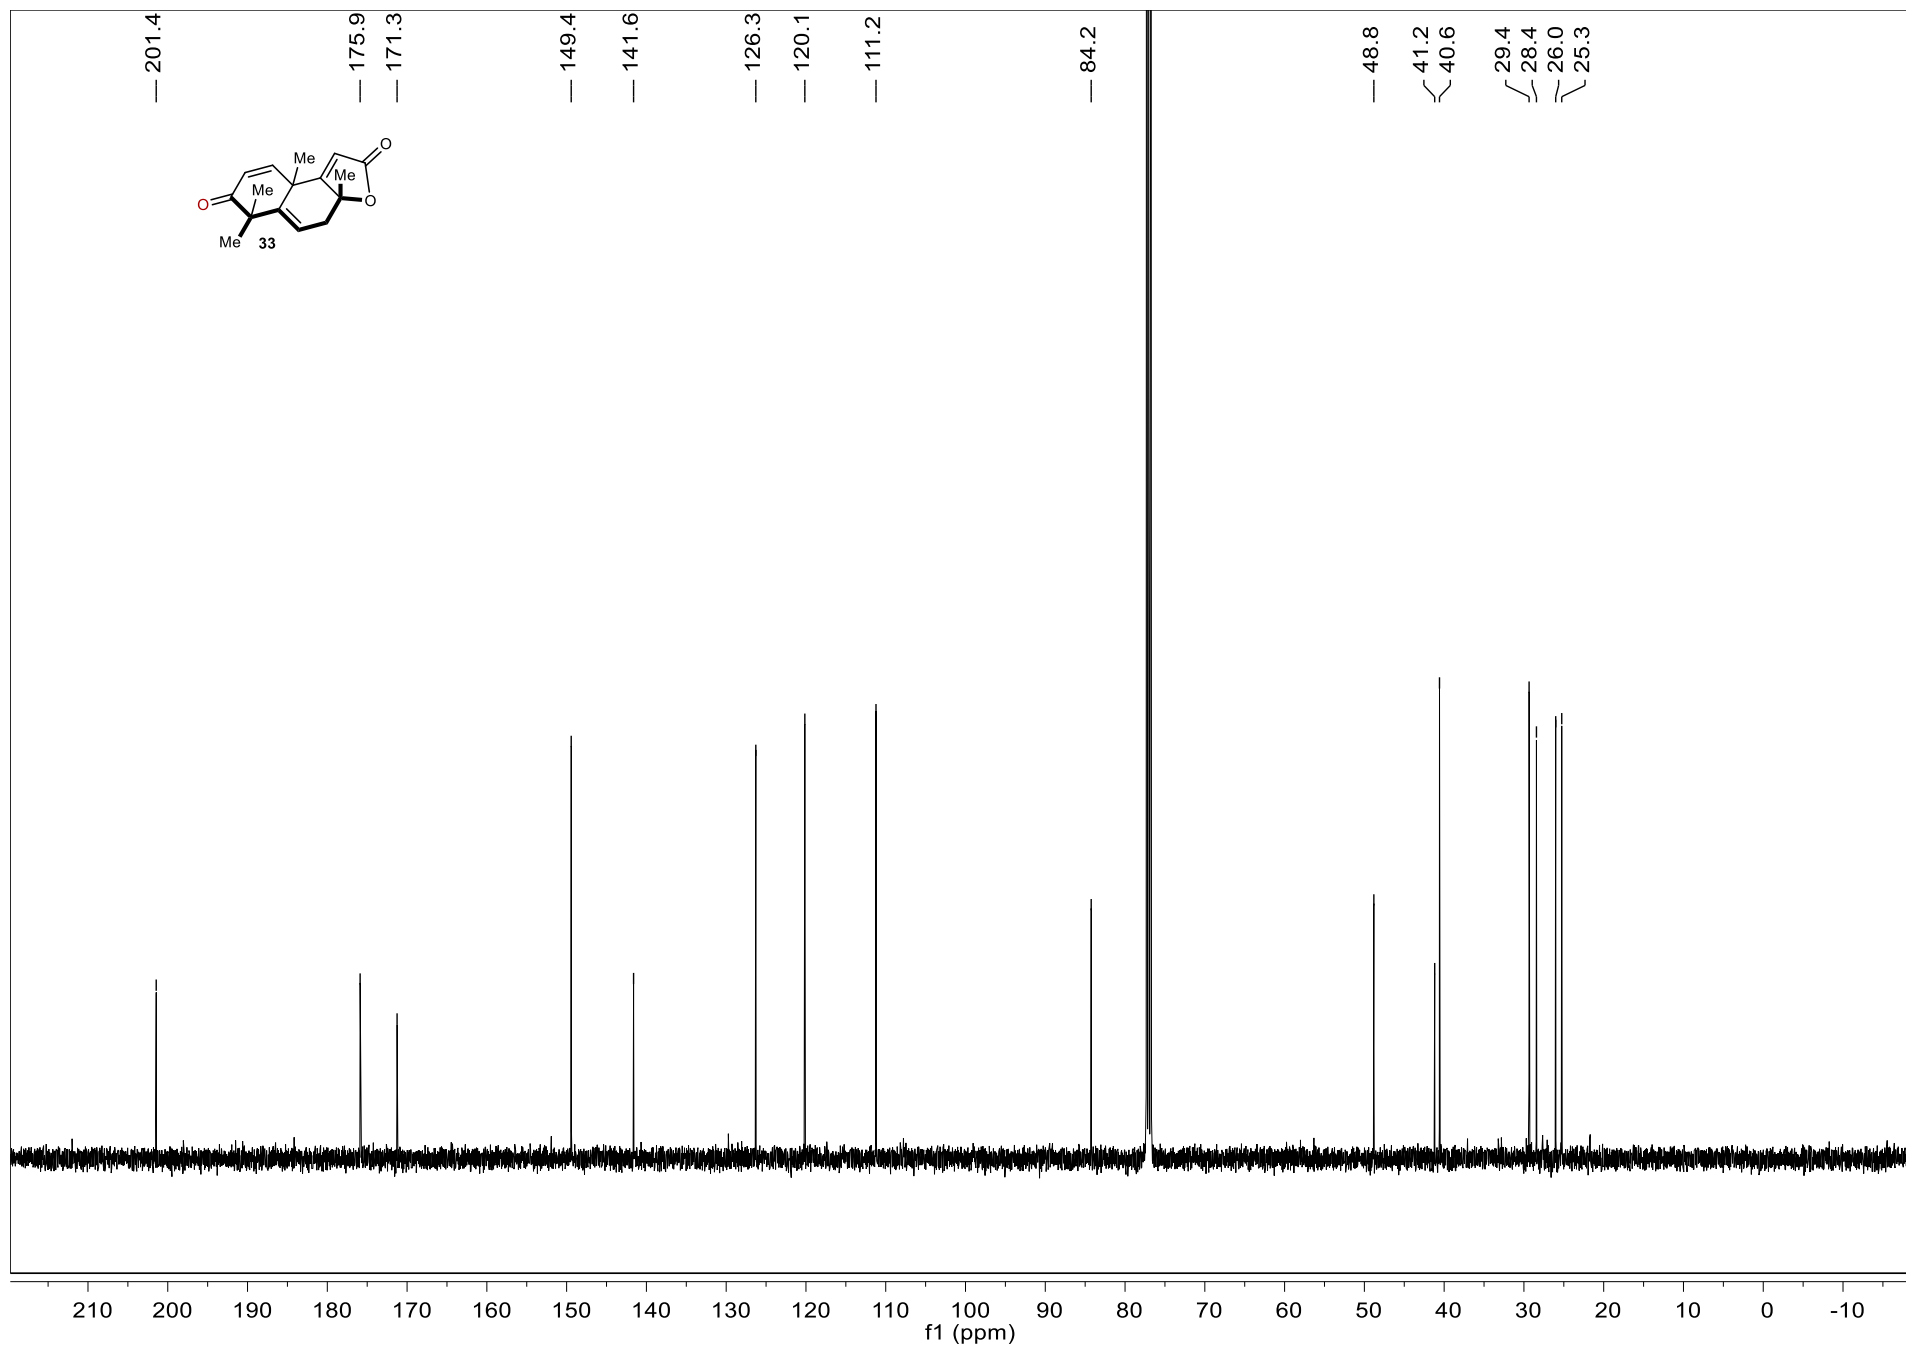

**$^1\text{H}$  NMR Spectrum of compound 34 (500 MHz,  $\text{CDCl}_3$ )**

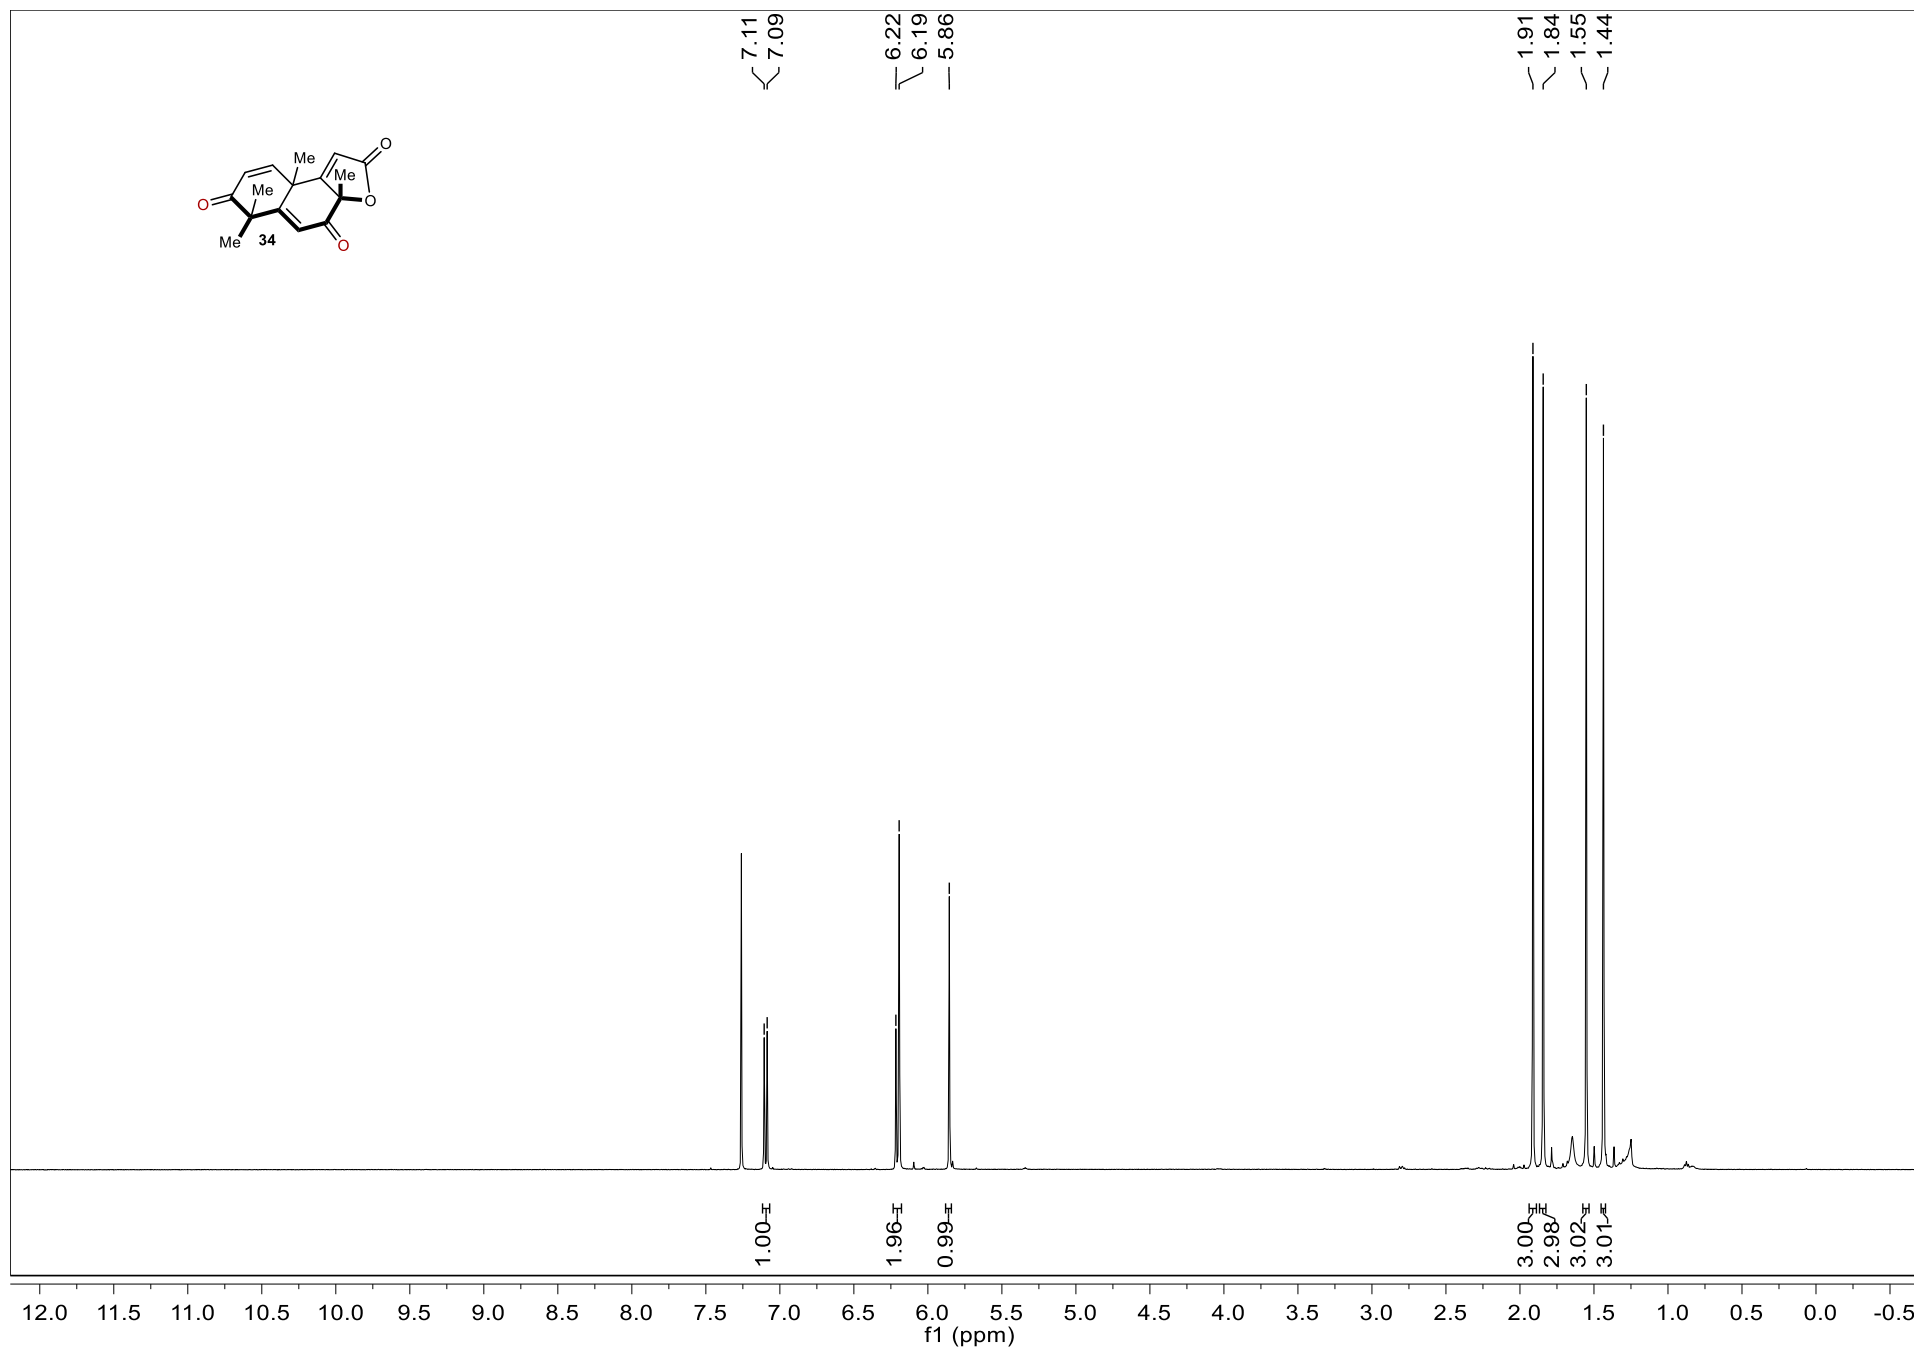

**$^{13}\text{C}$  NMR Spectrum of compound 34 (126 MHz,  $\text{CDCl}_3$ )**

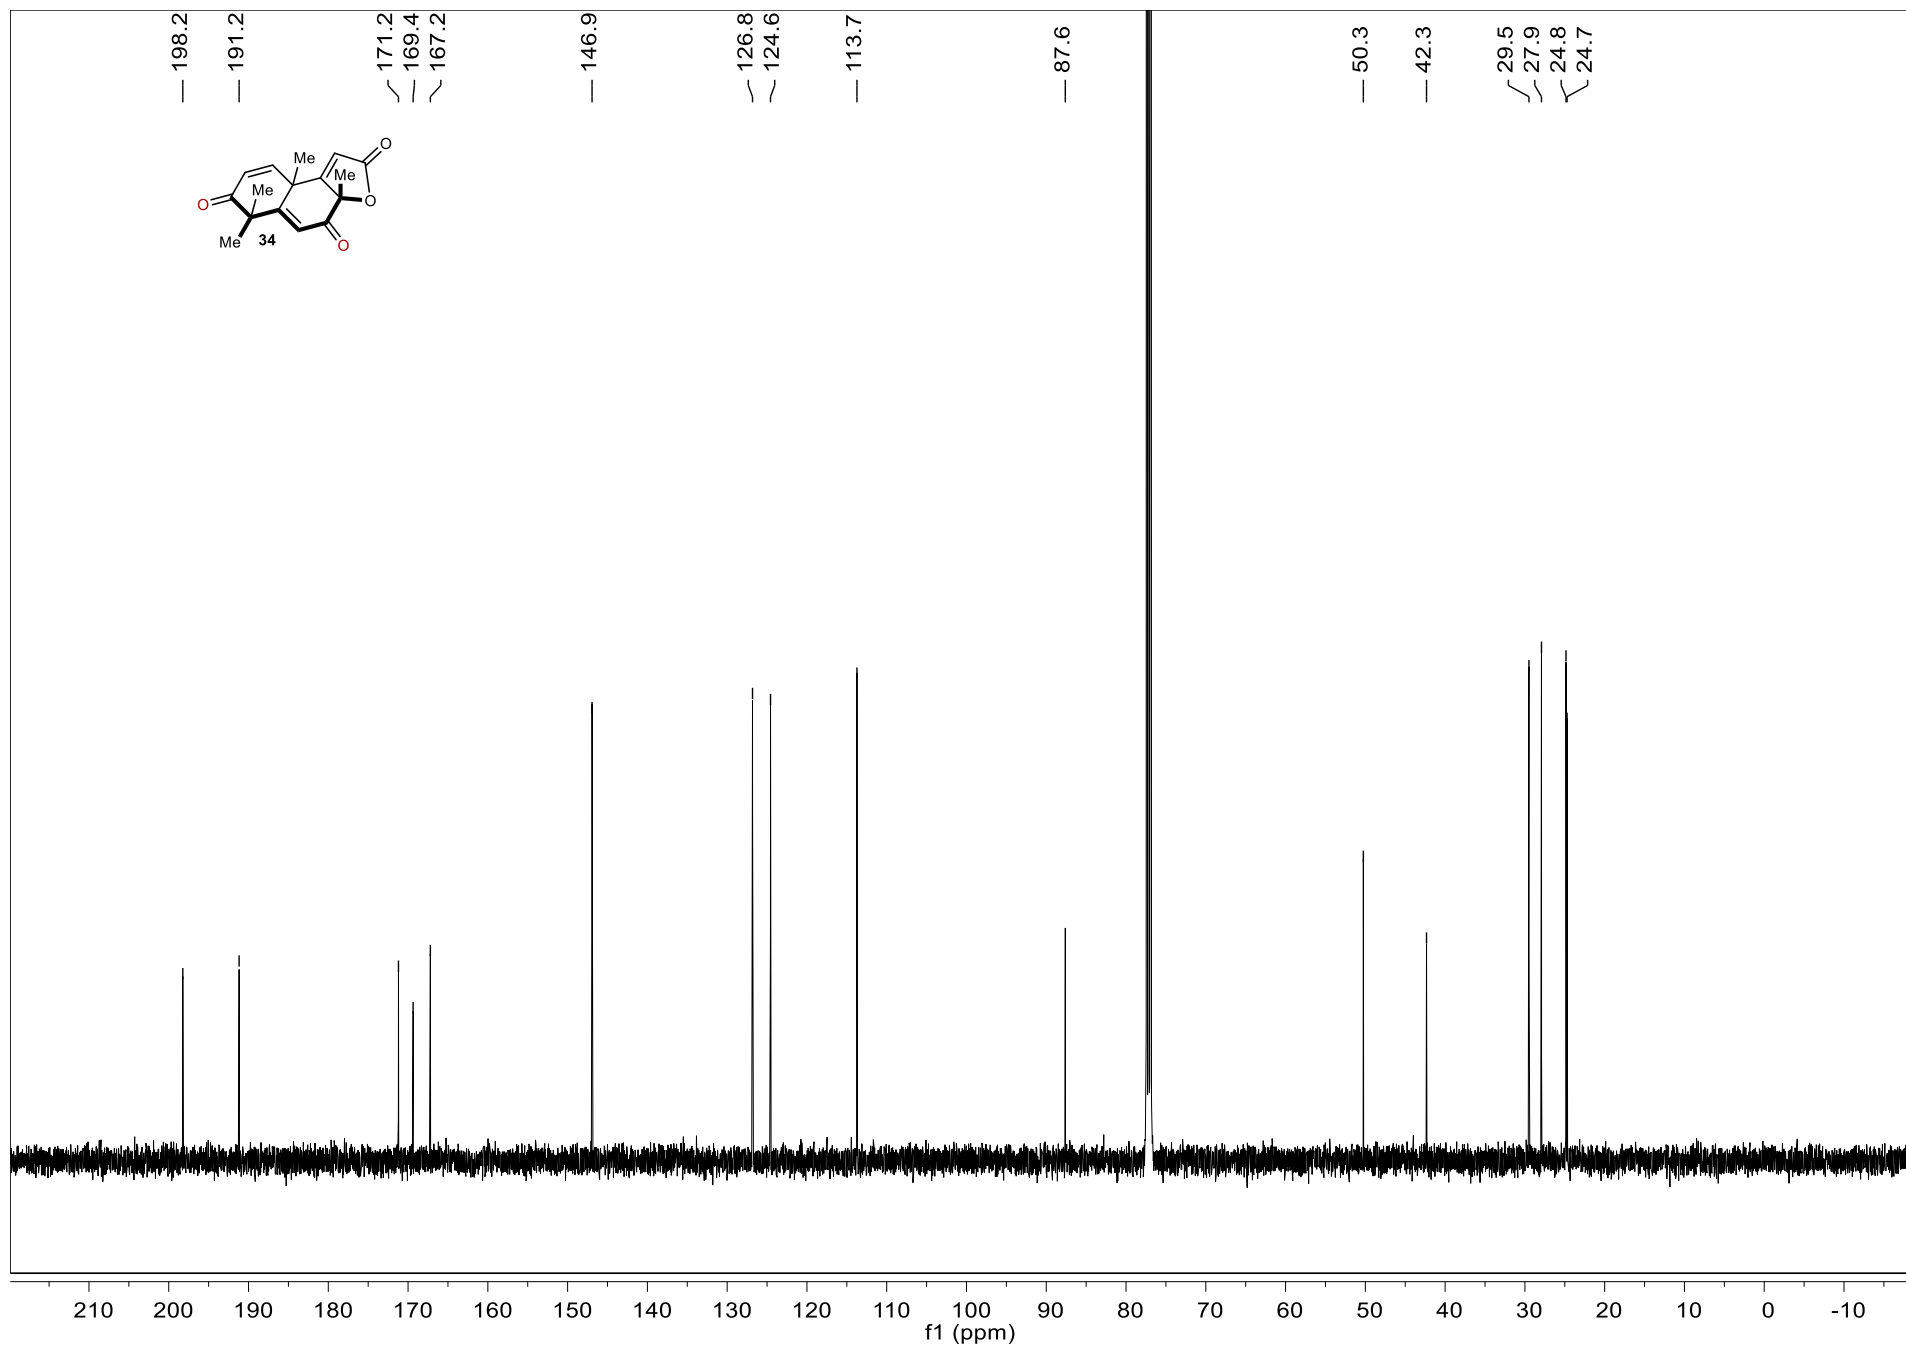



**<sup>1</sup>H NMR Spectrum of 35 (500 MHz, Acetone-*d*<sub>6</sub>)**

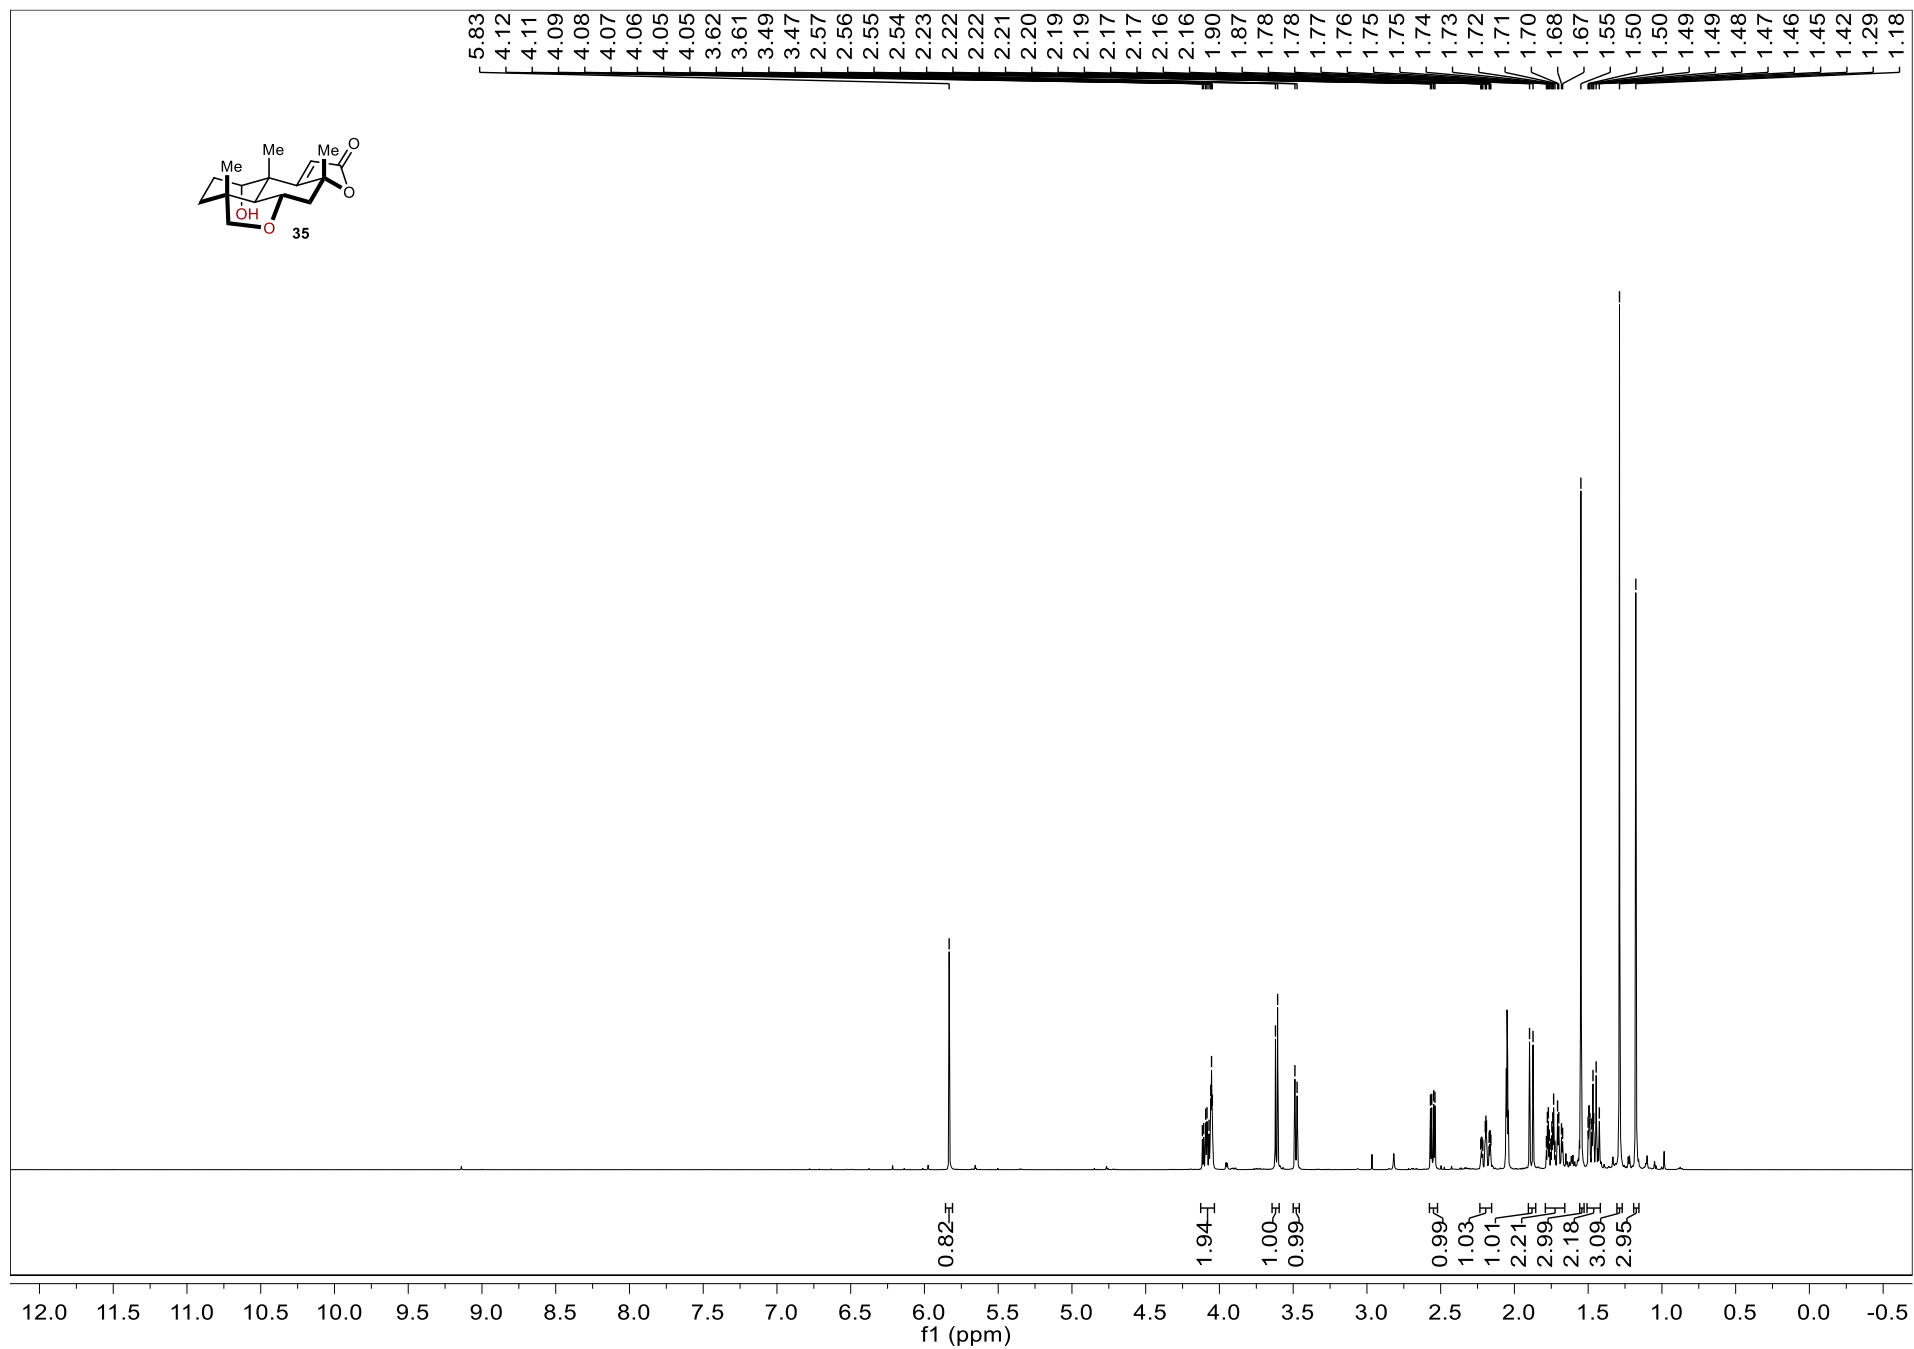

**$^{13}\text{C}$  NMR Spectrum of 35 (126 MHz, Acetone- $d_6$ )**

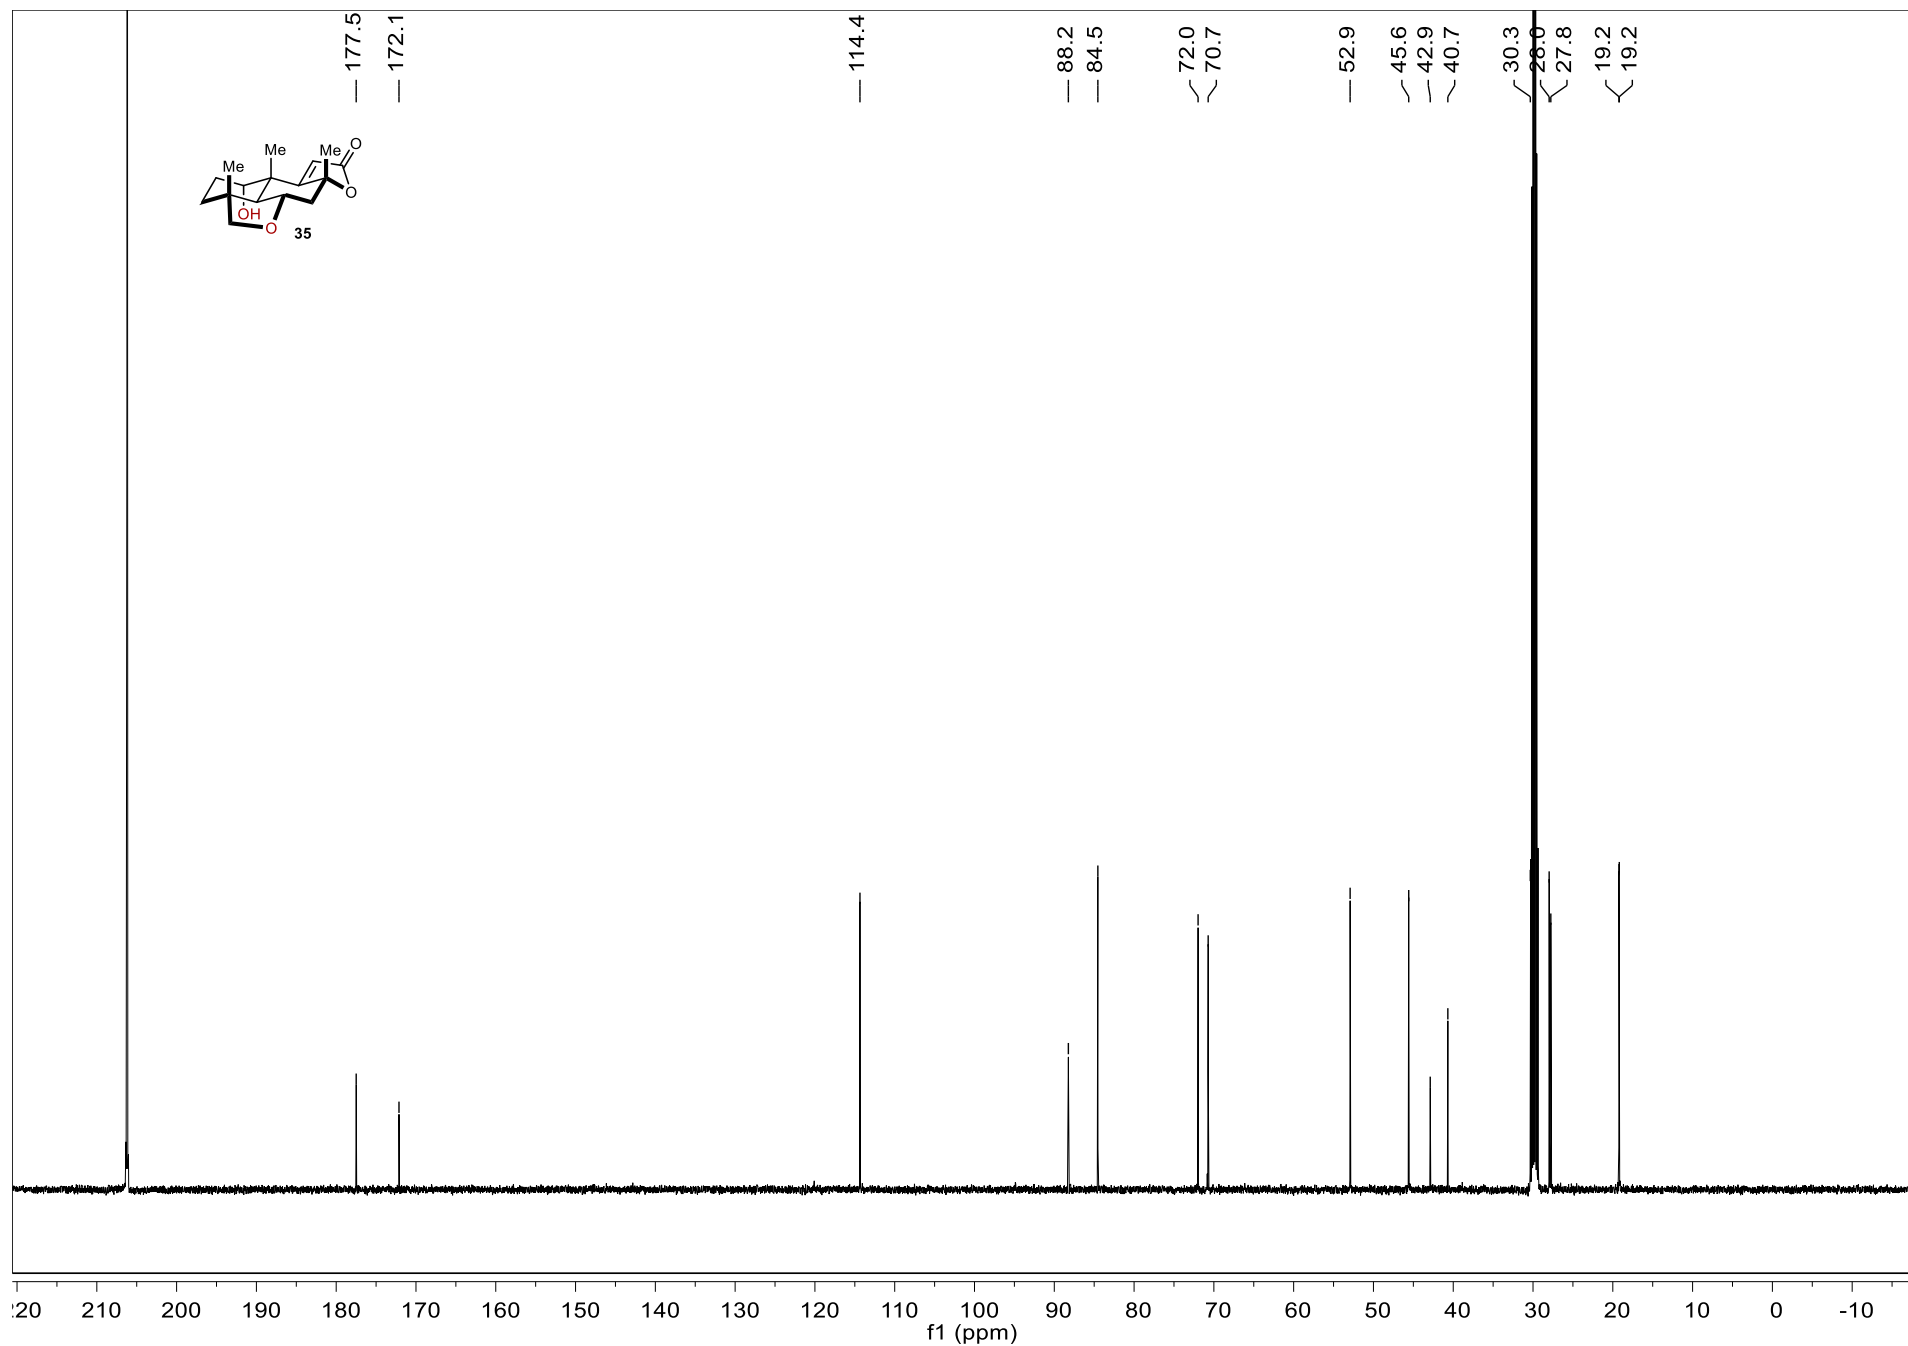

**<sup>1</sup>H NMR Spectrum of compound 36 (500 MHz, Methanol-*d*<sub>4</sub>)**

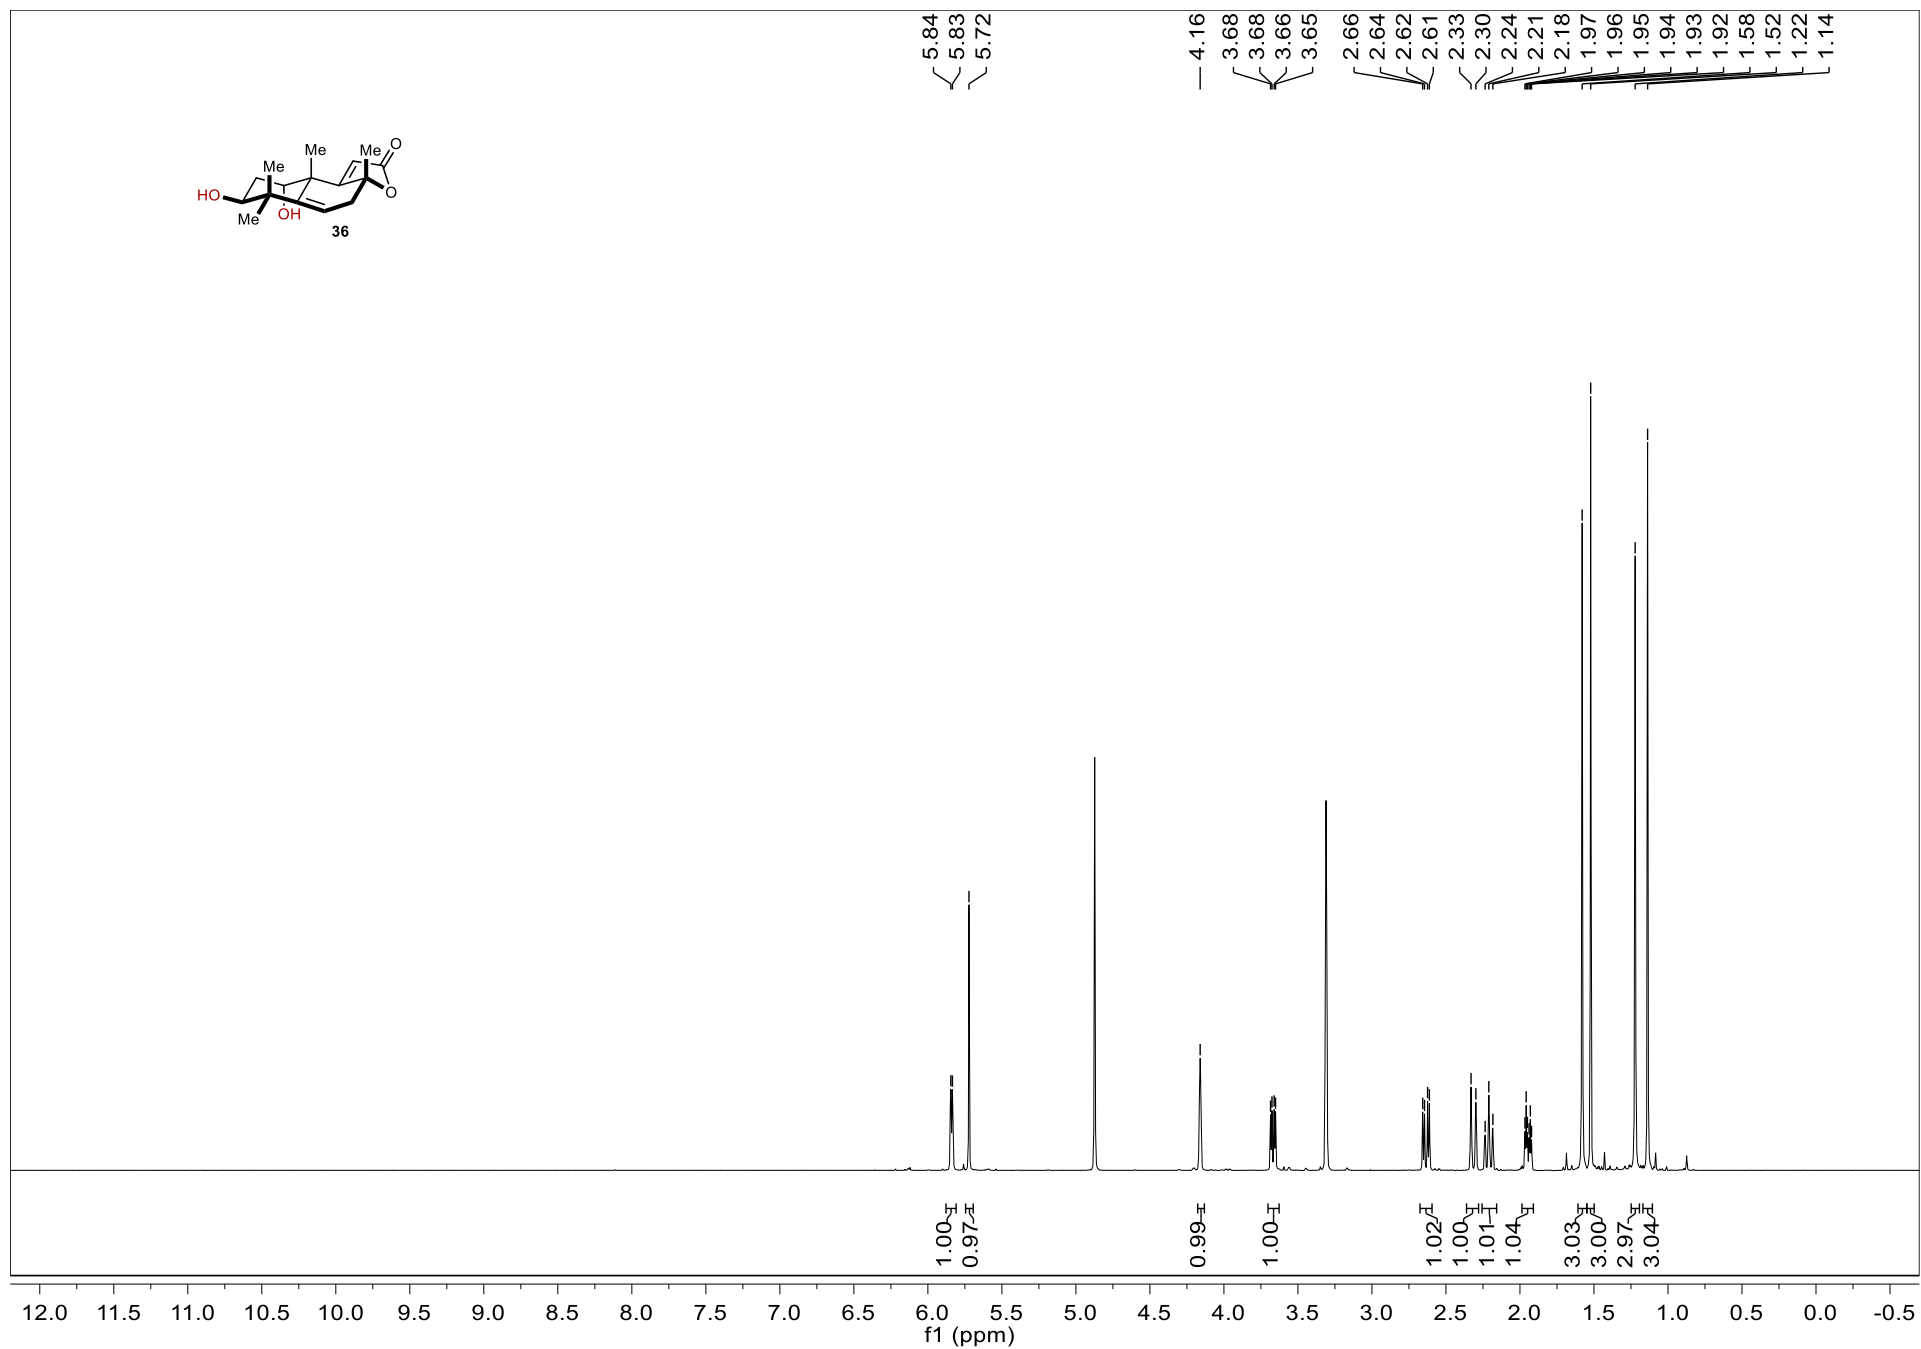

**$^{13}\text{C}$  NMR Spectrum of compound 36 (126 MHz, Methanol- $d_4$ )**

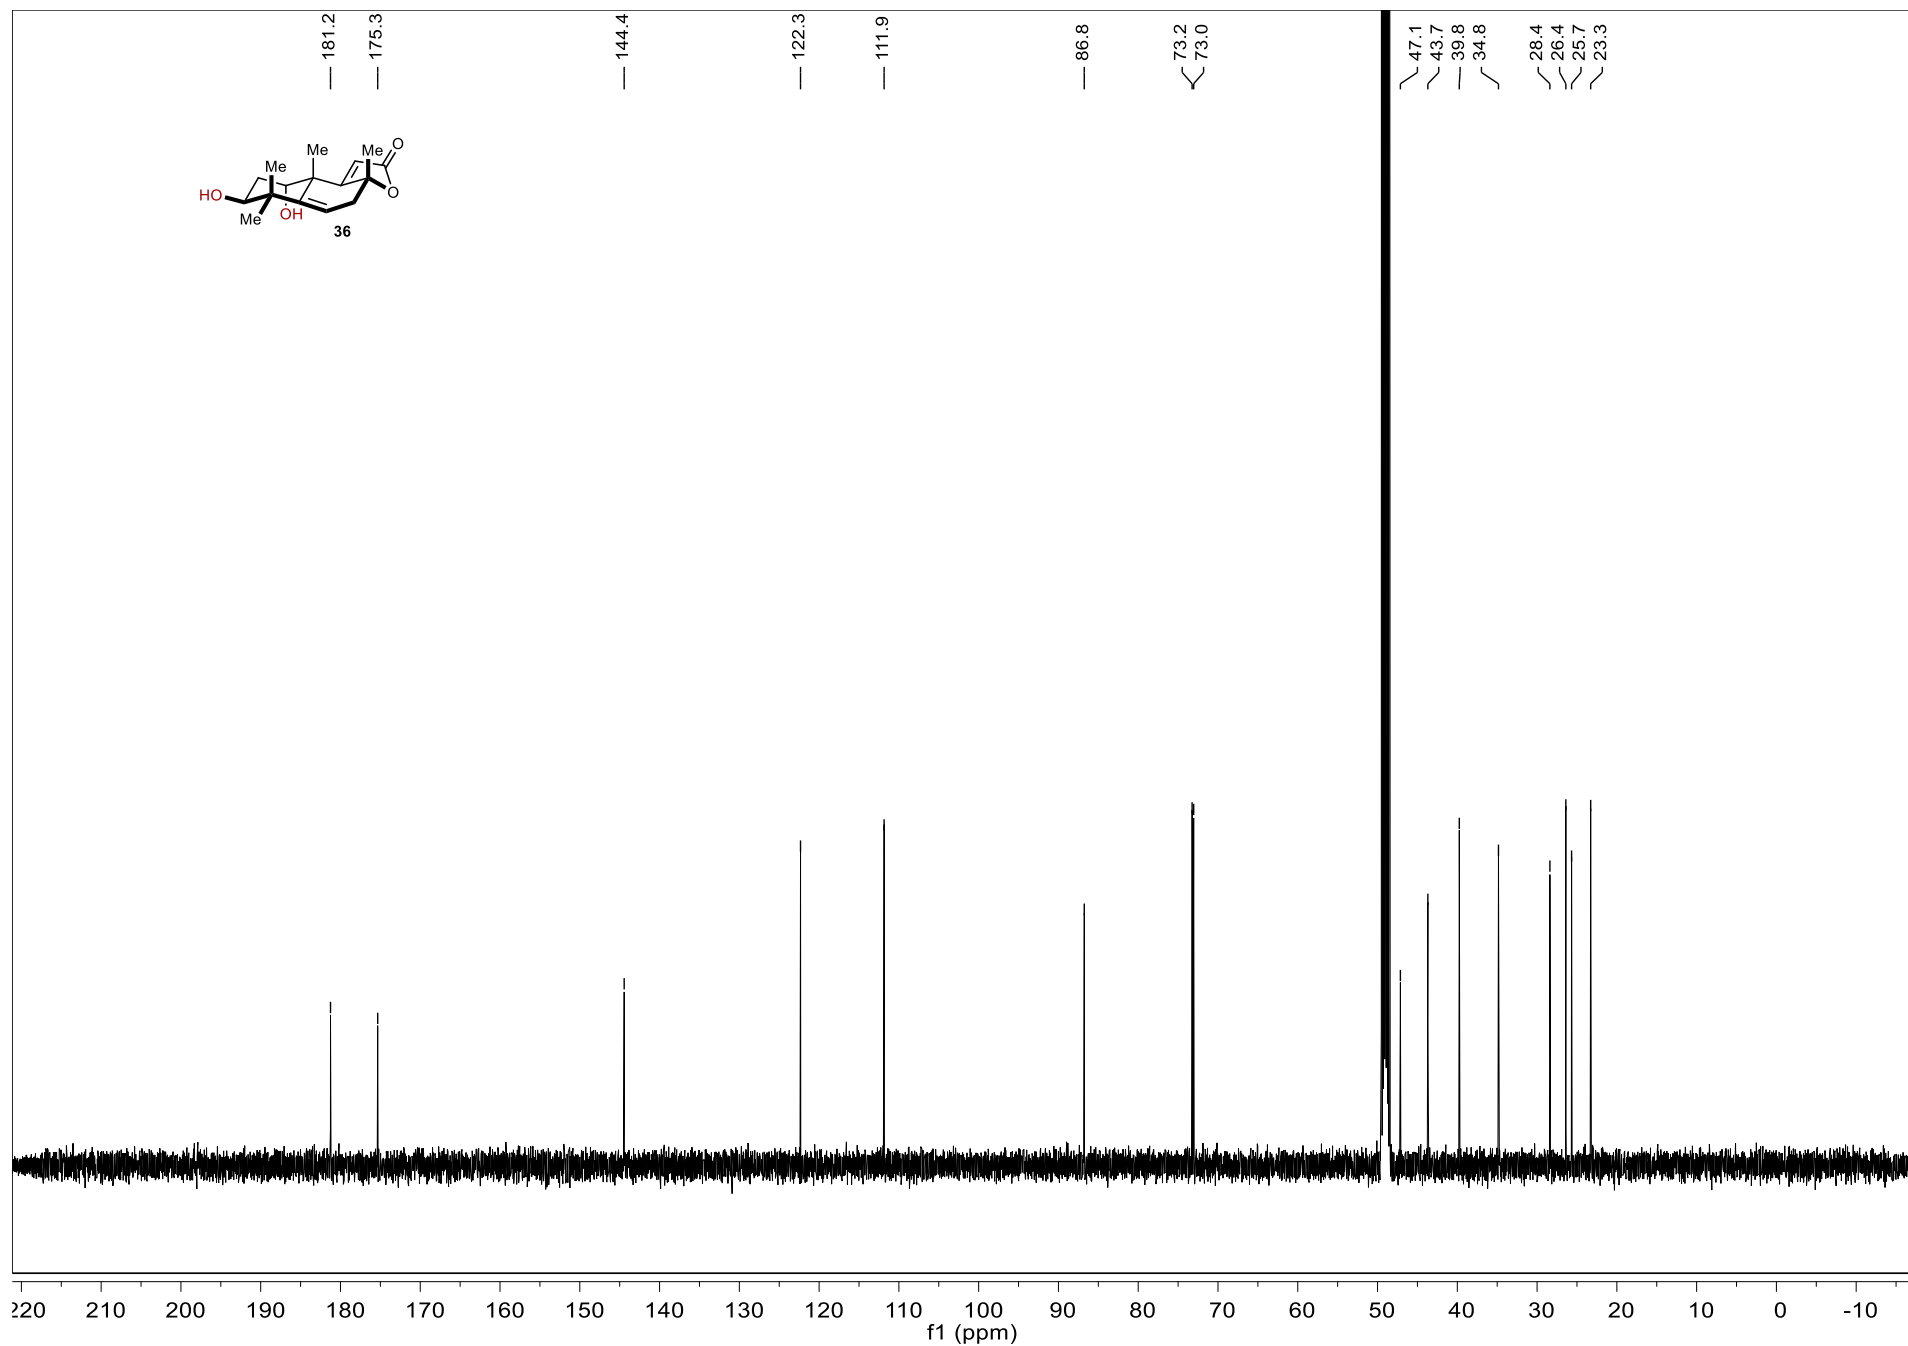

**$^1\text{H}$  NMR Spectrum of compound 37 (500 MHz, Methanol- $d_4$ :  $\text{CDCl}_3$  = 3: 2)**

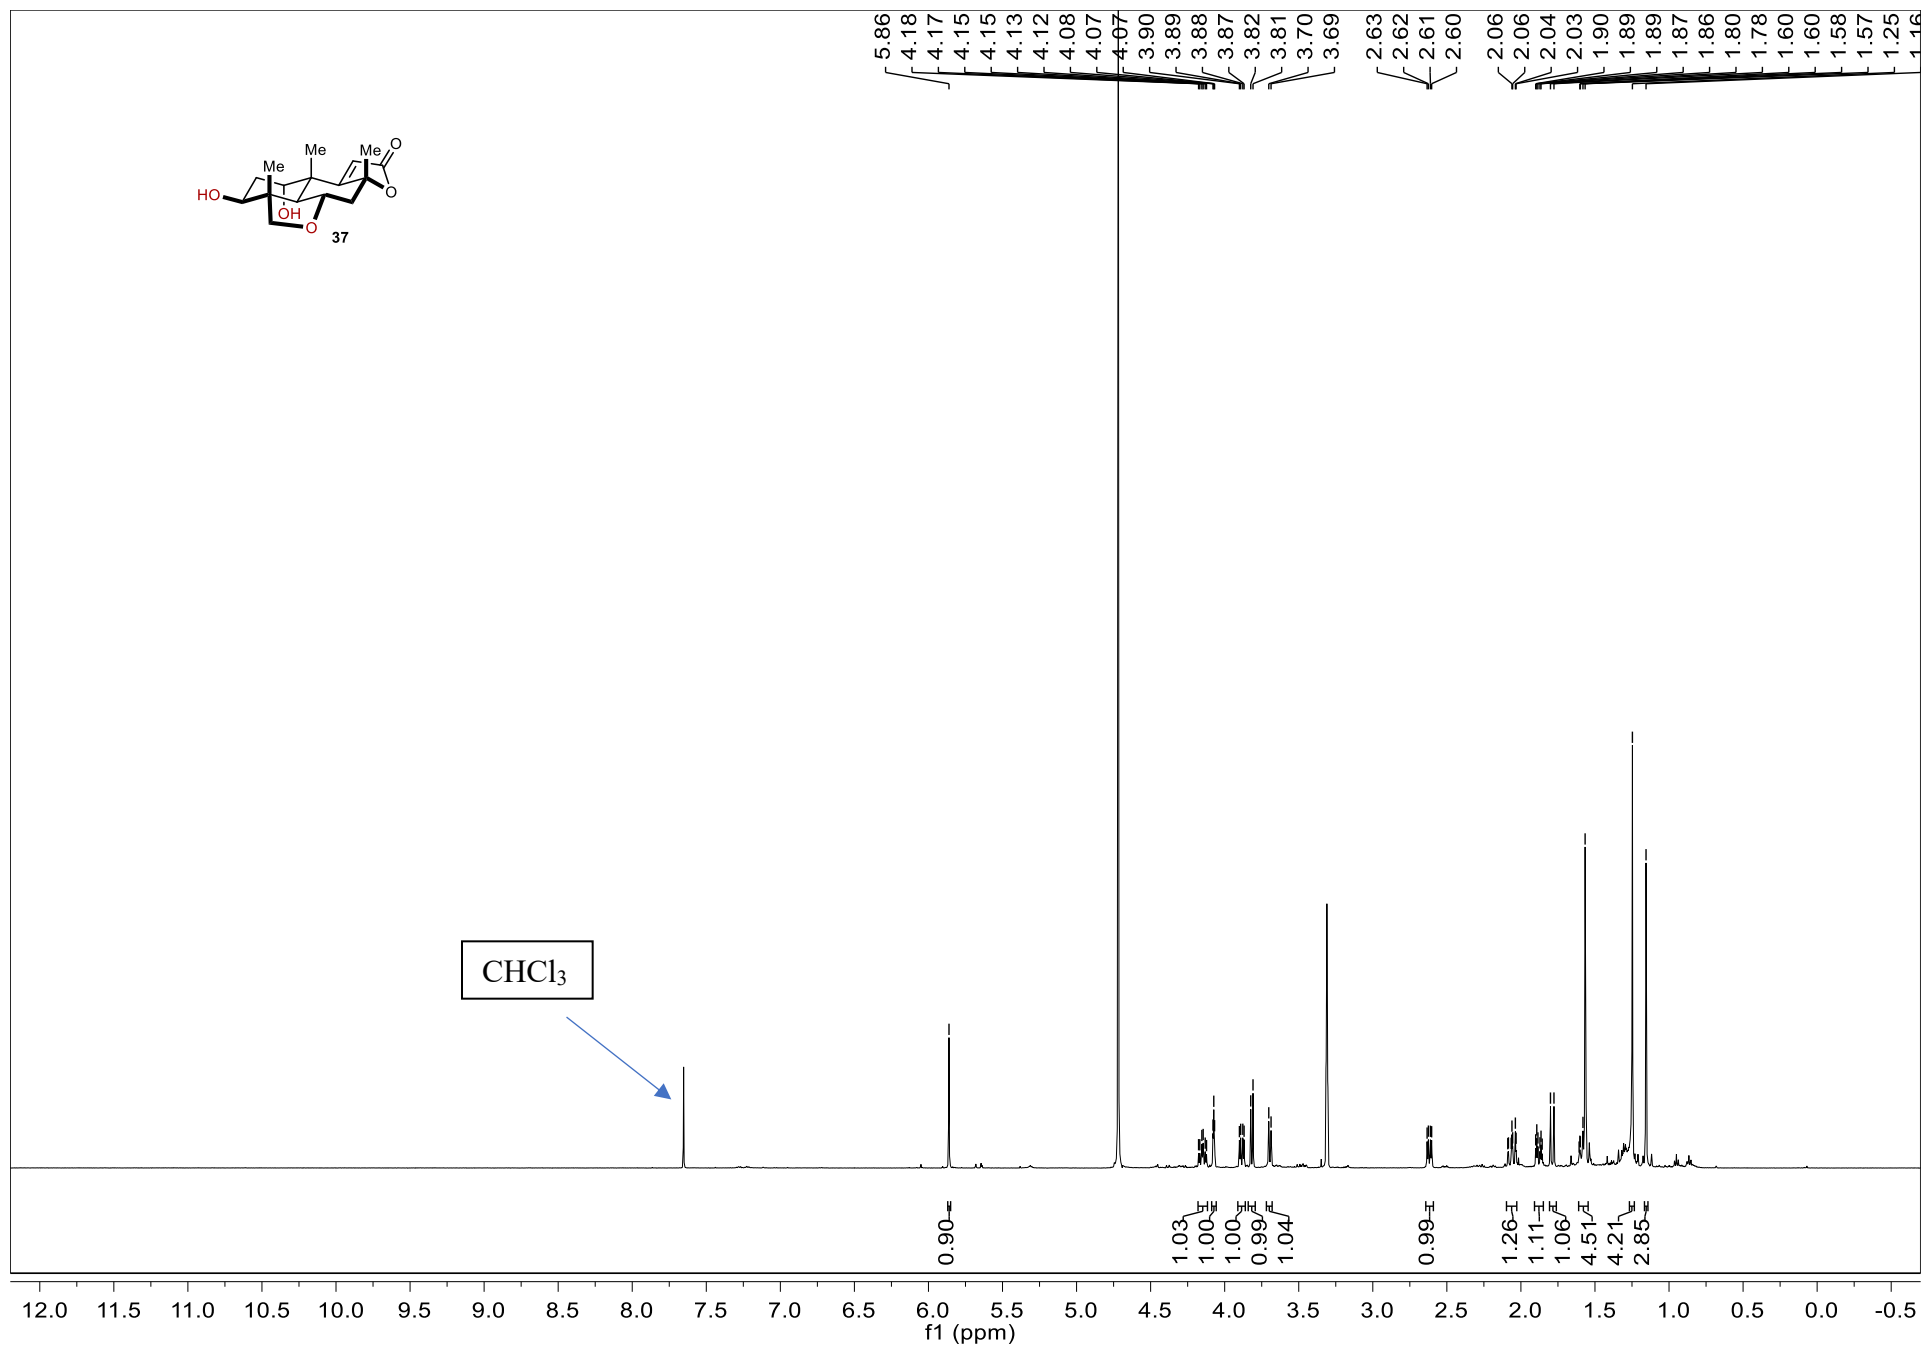

**$^{13}\text{C}$  NMR Spectrum of compound 37 (126 MHz, Methanol- $d_4$ :  $\text{CDCl}_3$  = 3: 2)**

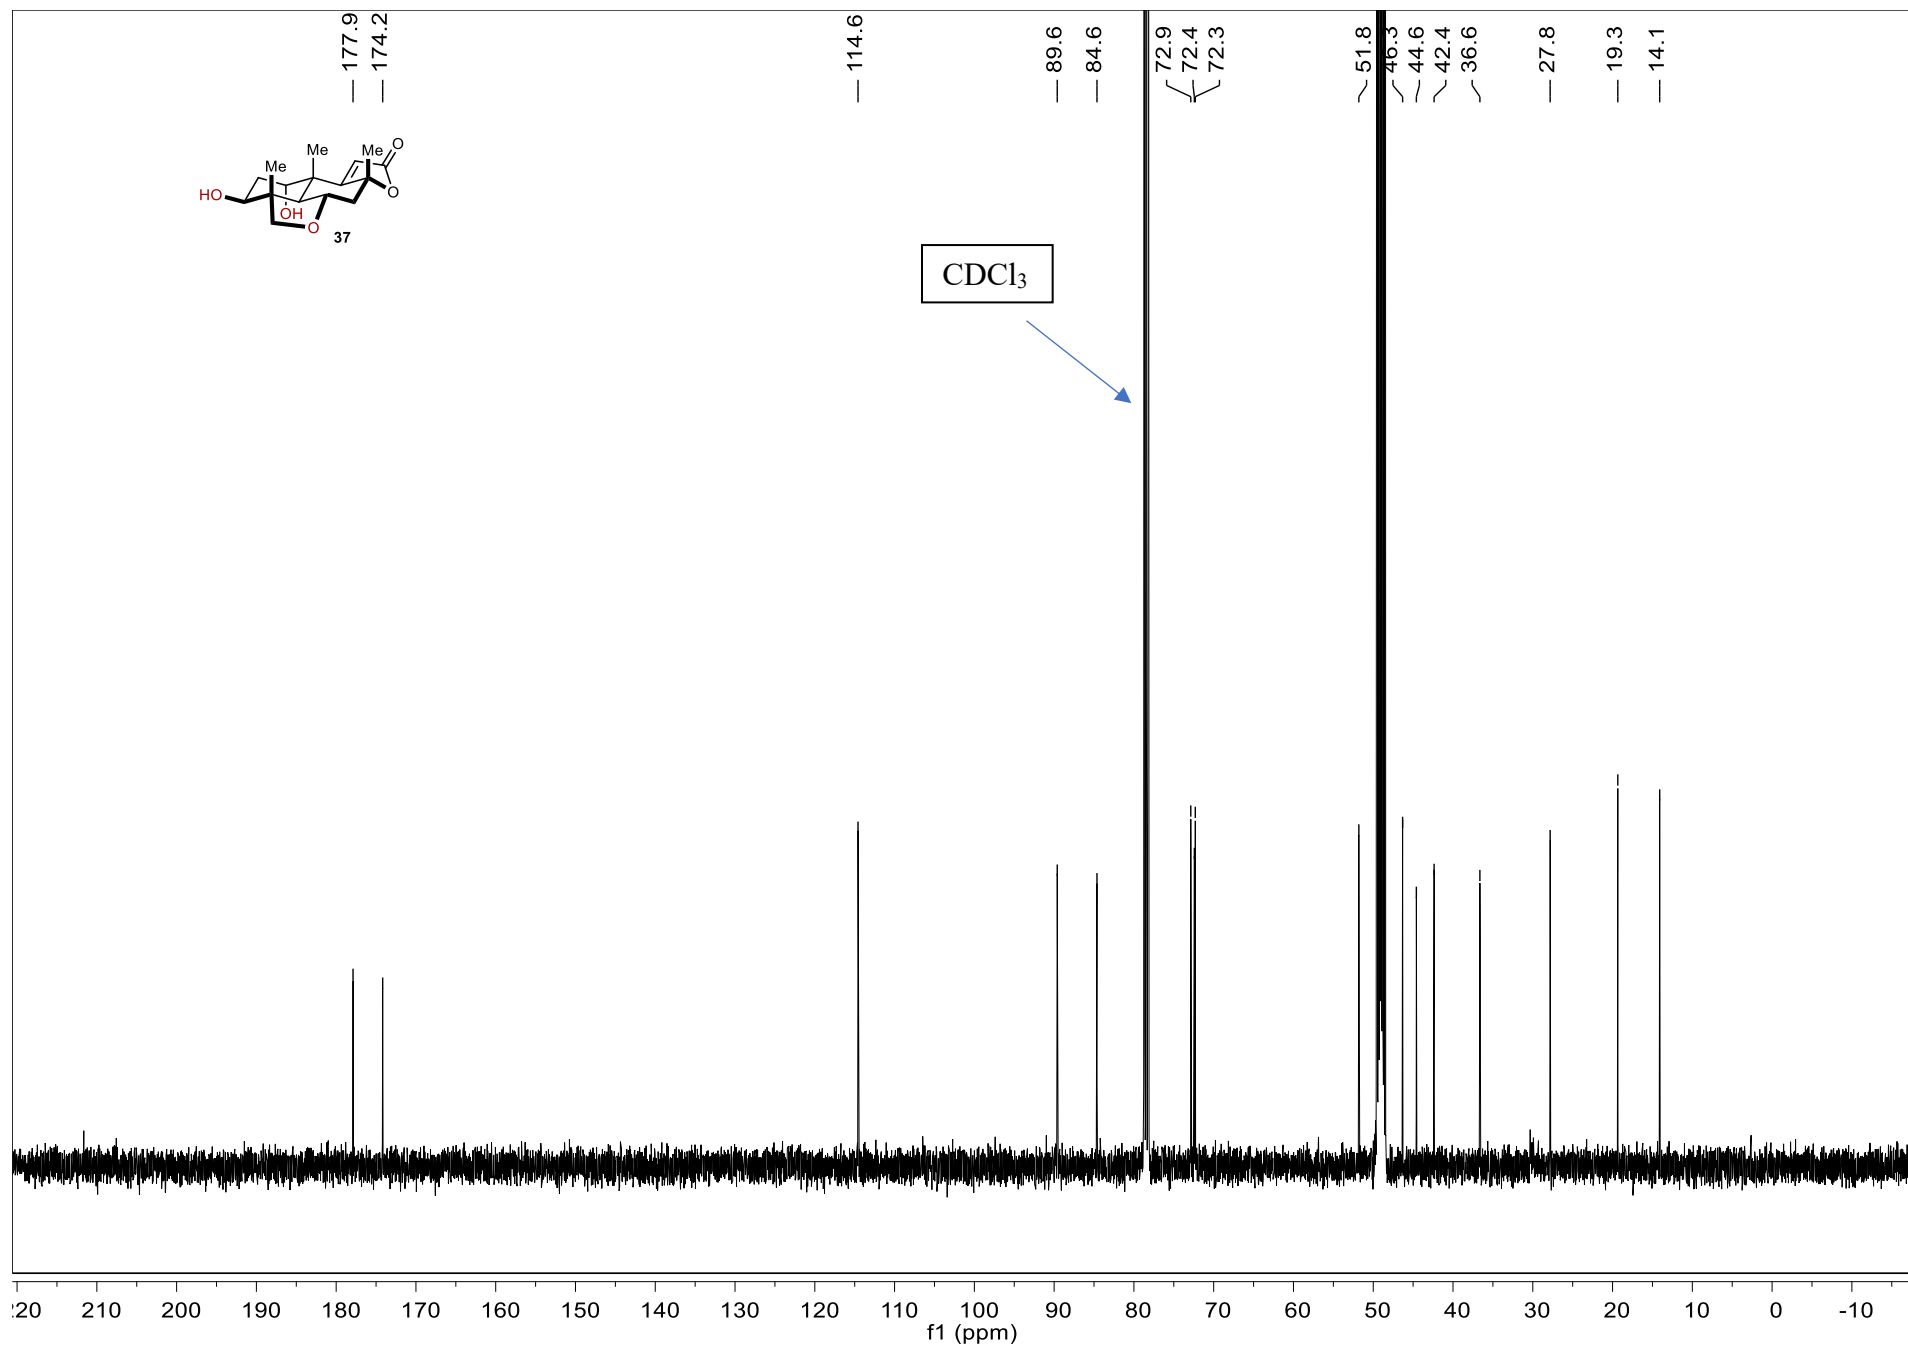

**<sup>1</sup>H NMR Spectrum of compound 38 (500 MHz, Methanol-*d*<sub>4</sub>)**

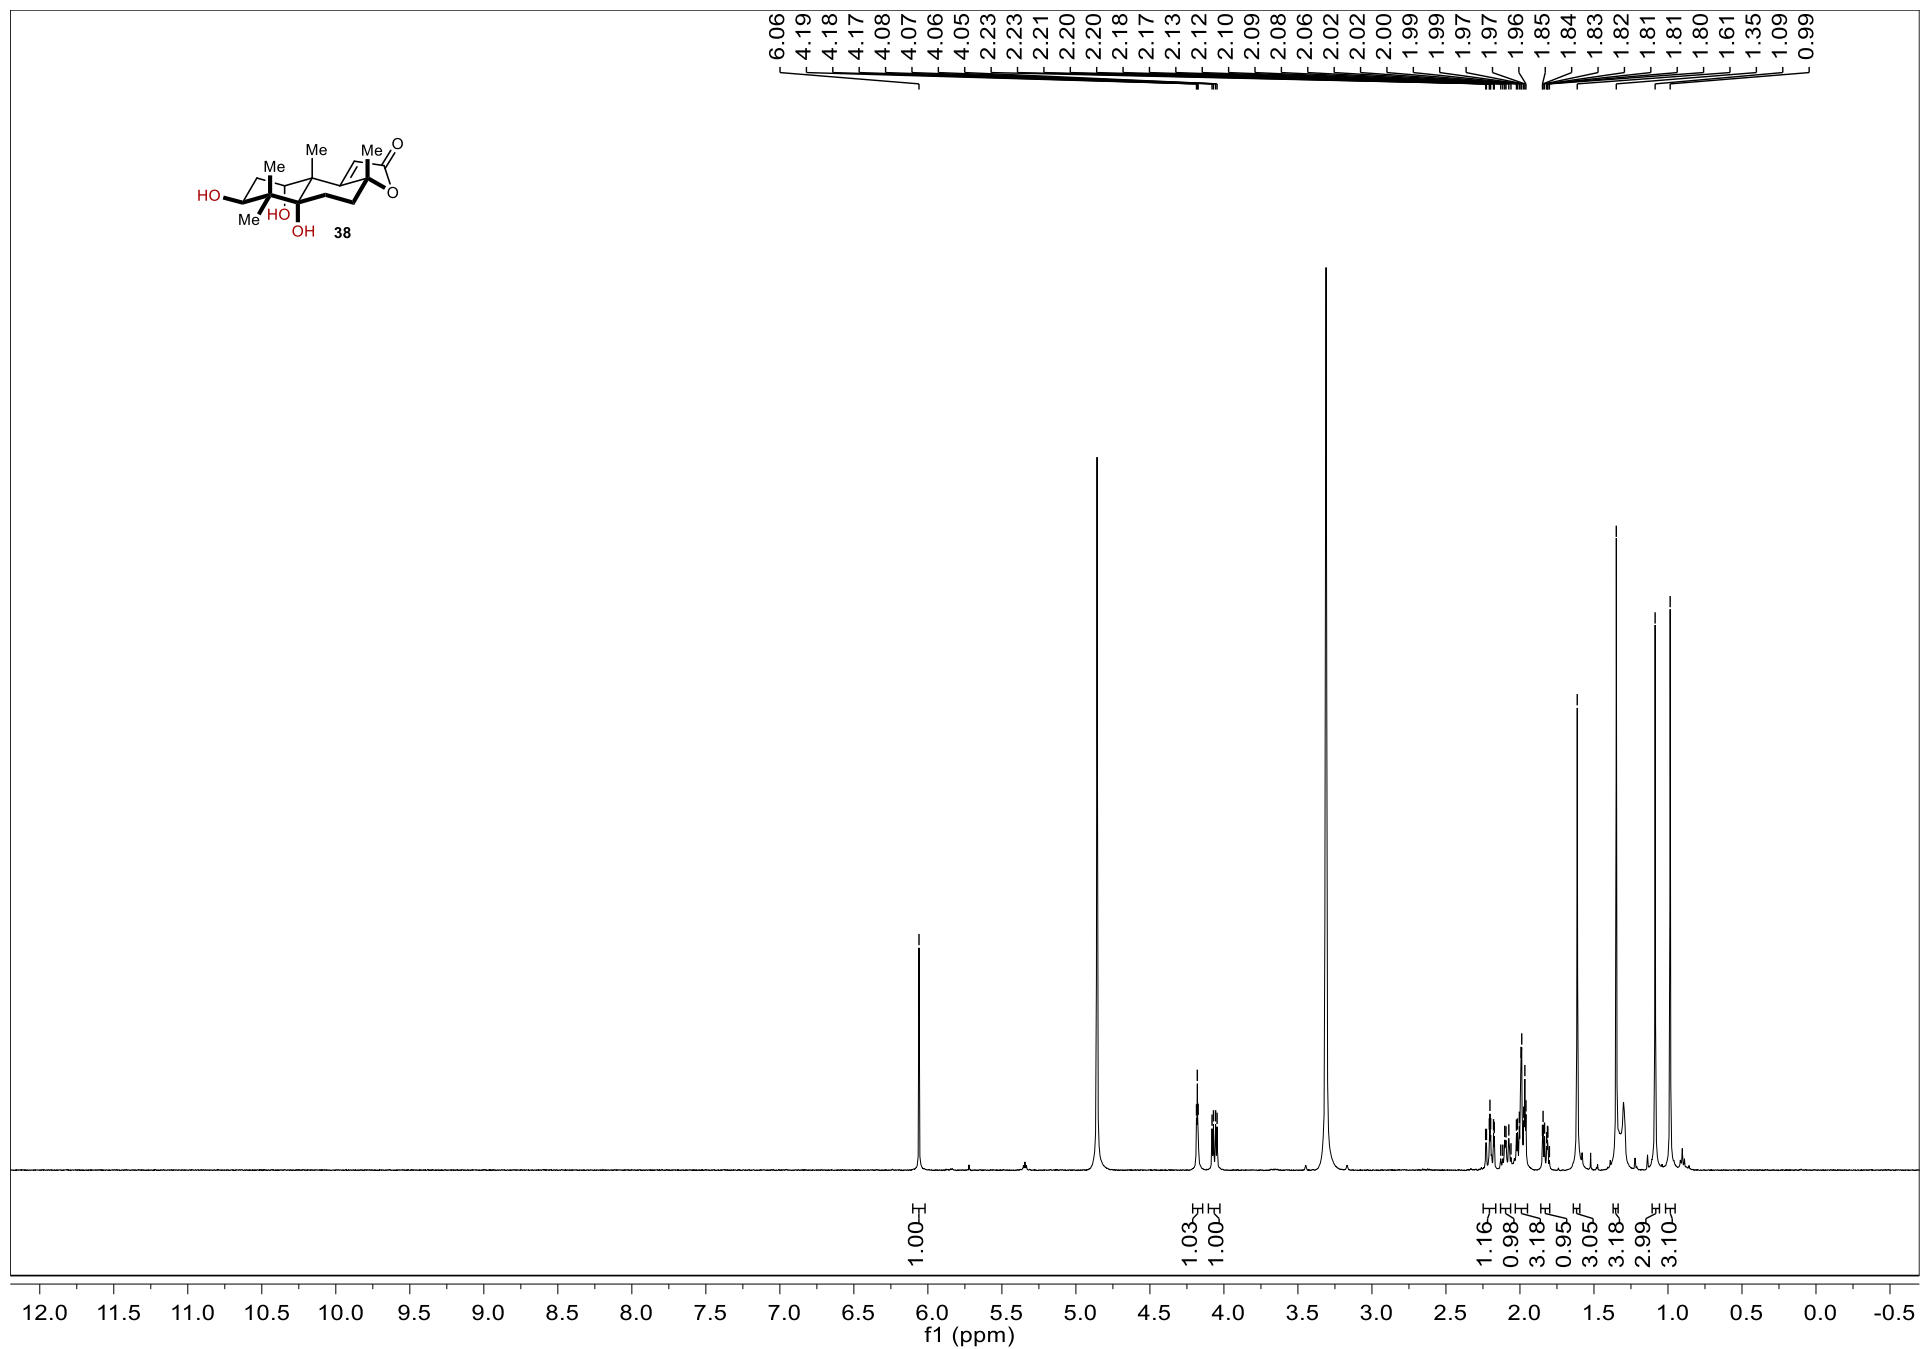

**$^{13}\text{C}$  NMR Spectrum of compound 38 (126 MHz, Methanol- $d_4$ )**

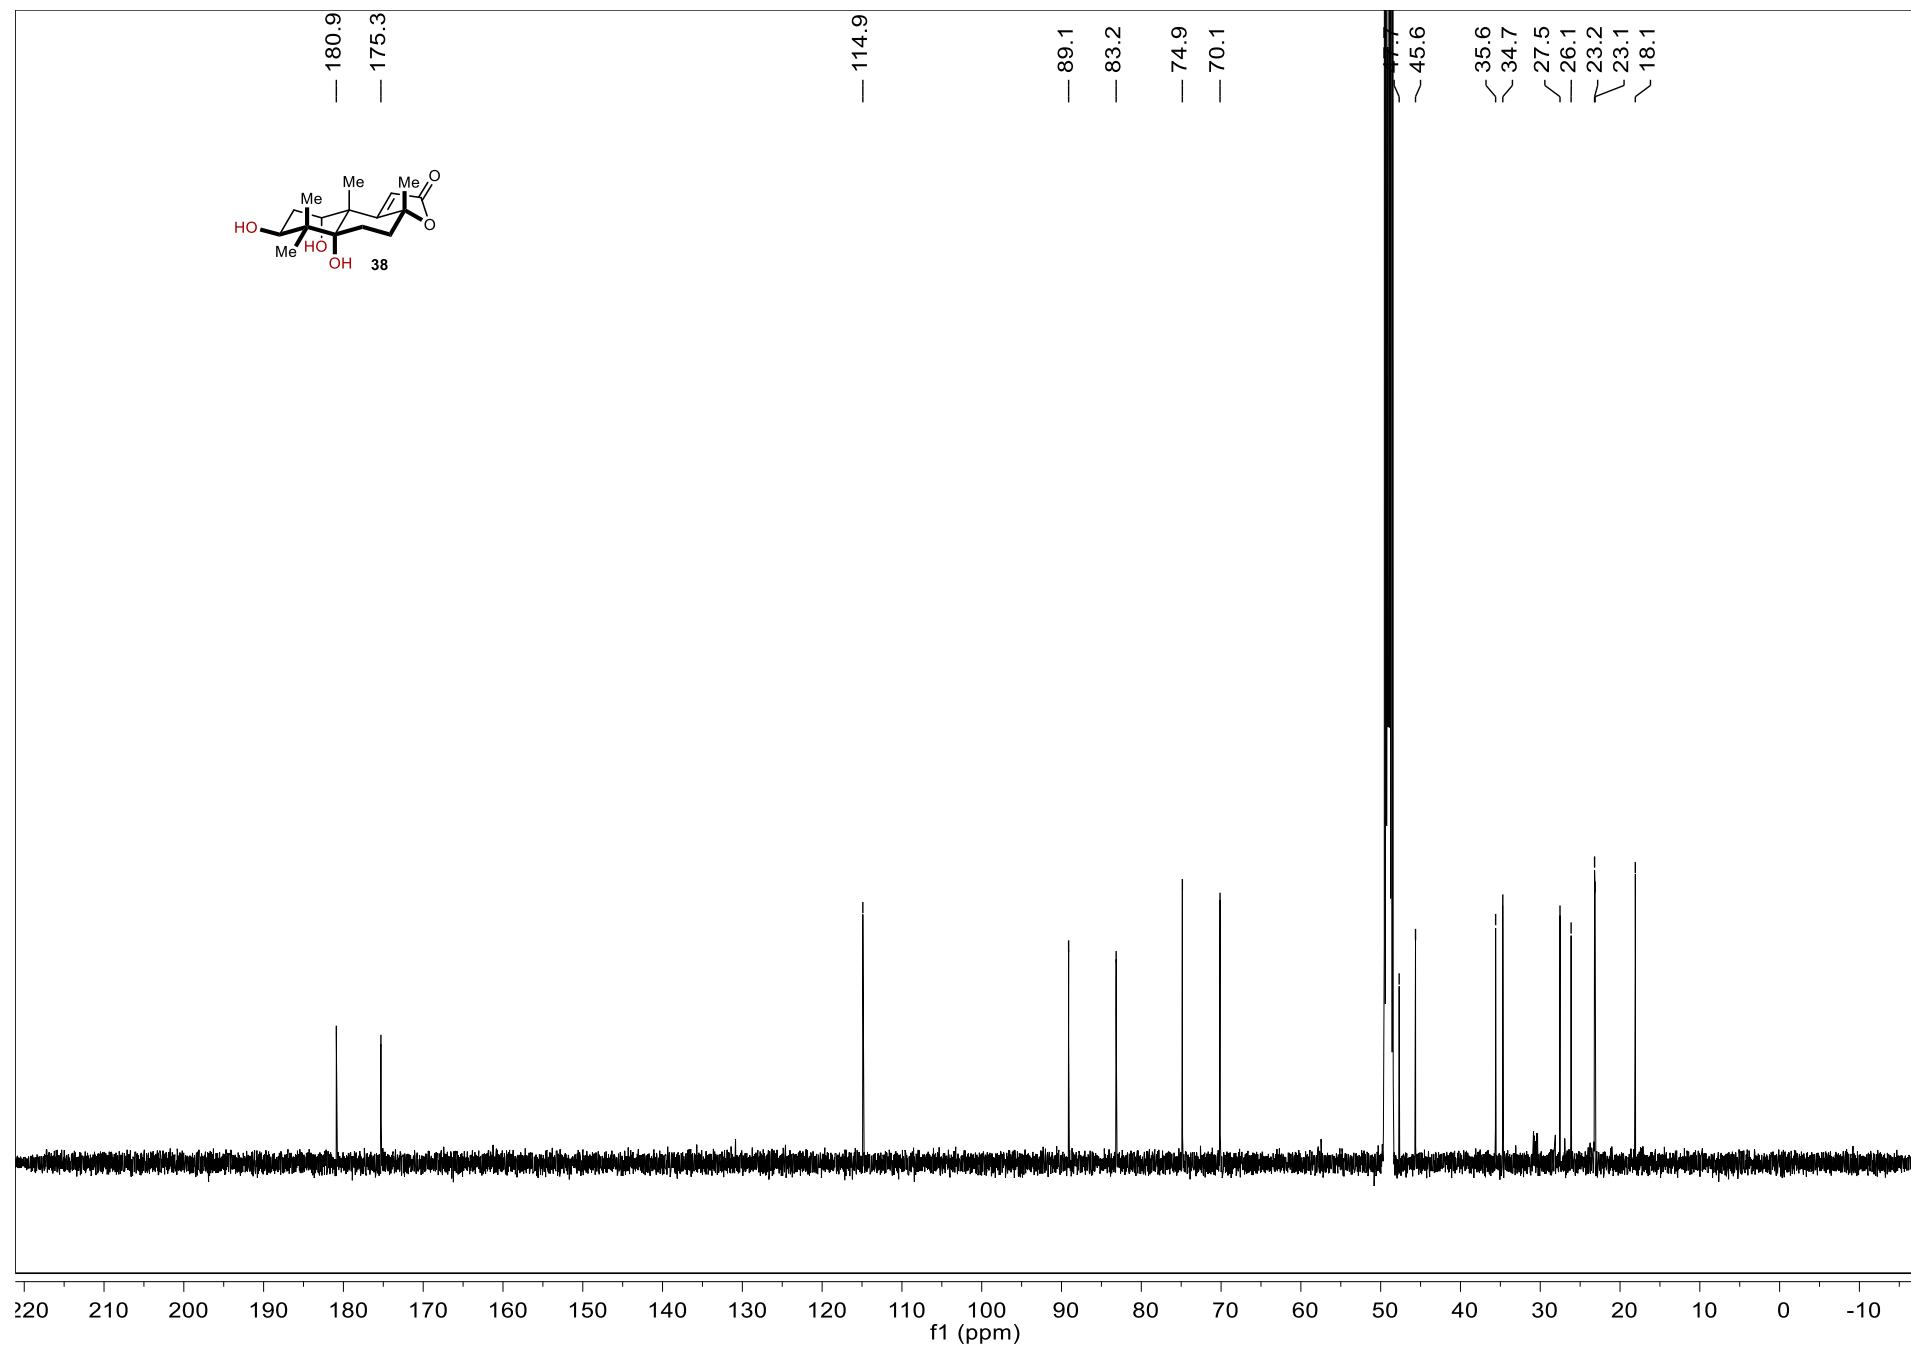



**$^1\text{H}$  NMR Spectrum of compound 39 (500 MHz,  $\text{CDCl}_3$ )**

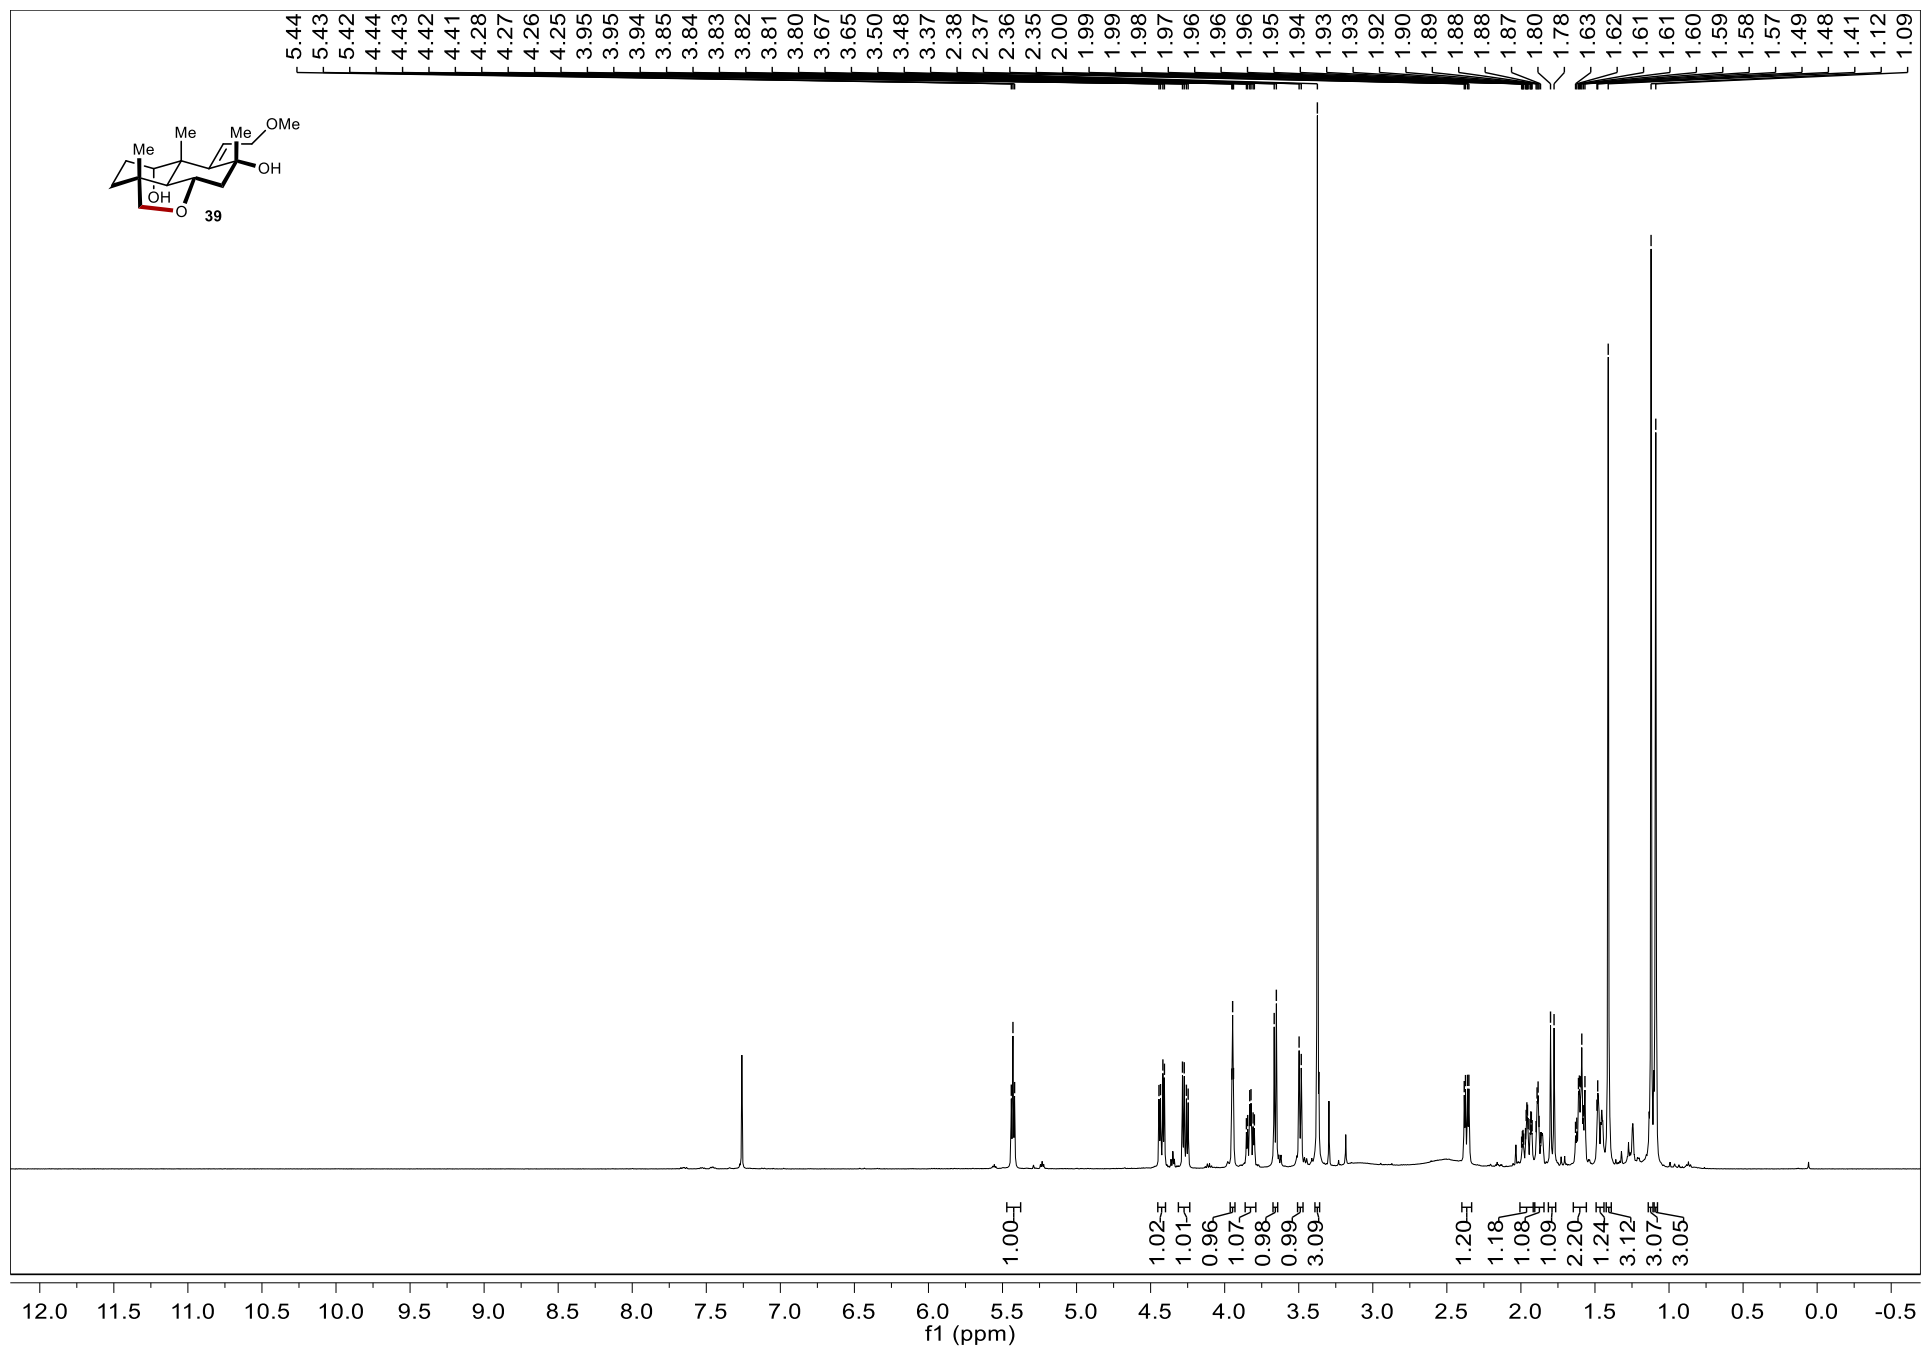

**$^{13}\text{C}$  NMR Spectrum of compound 39 (126 MHz,  $\text{CDCl}_3$ )**

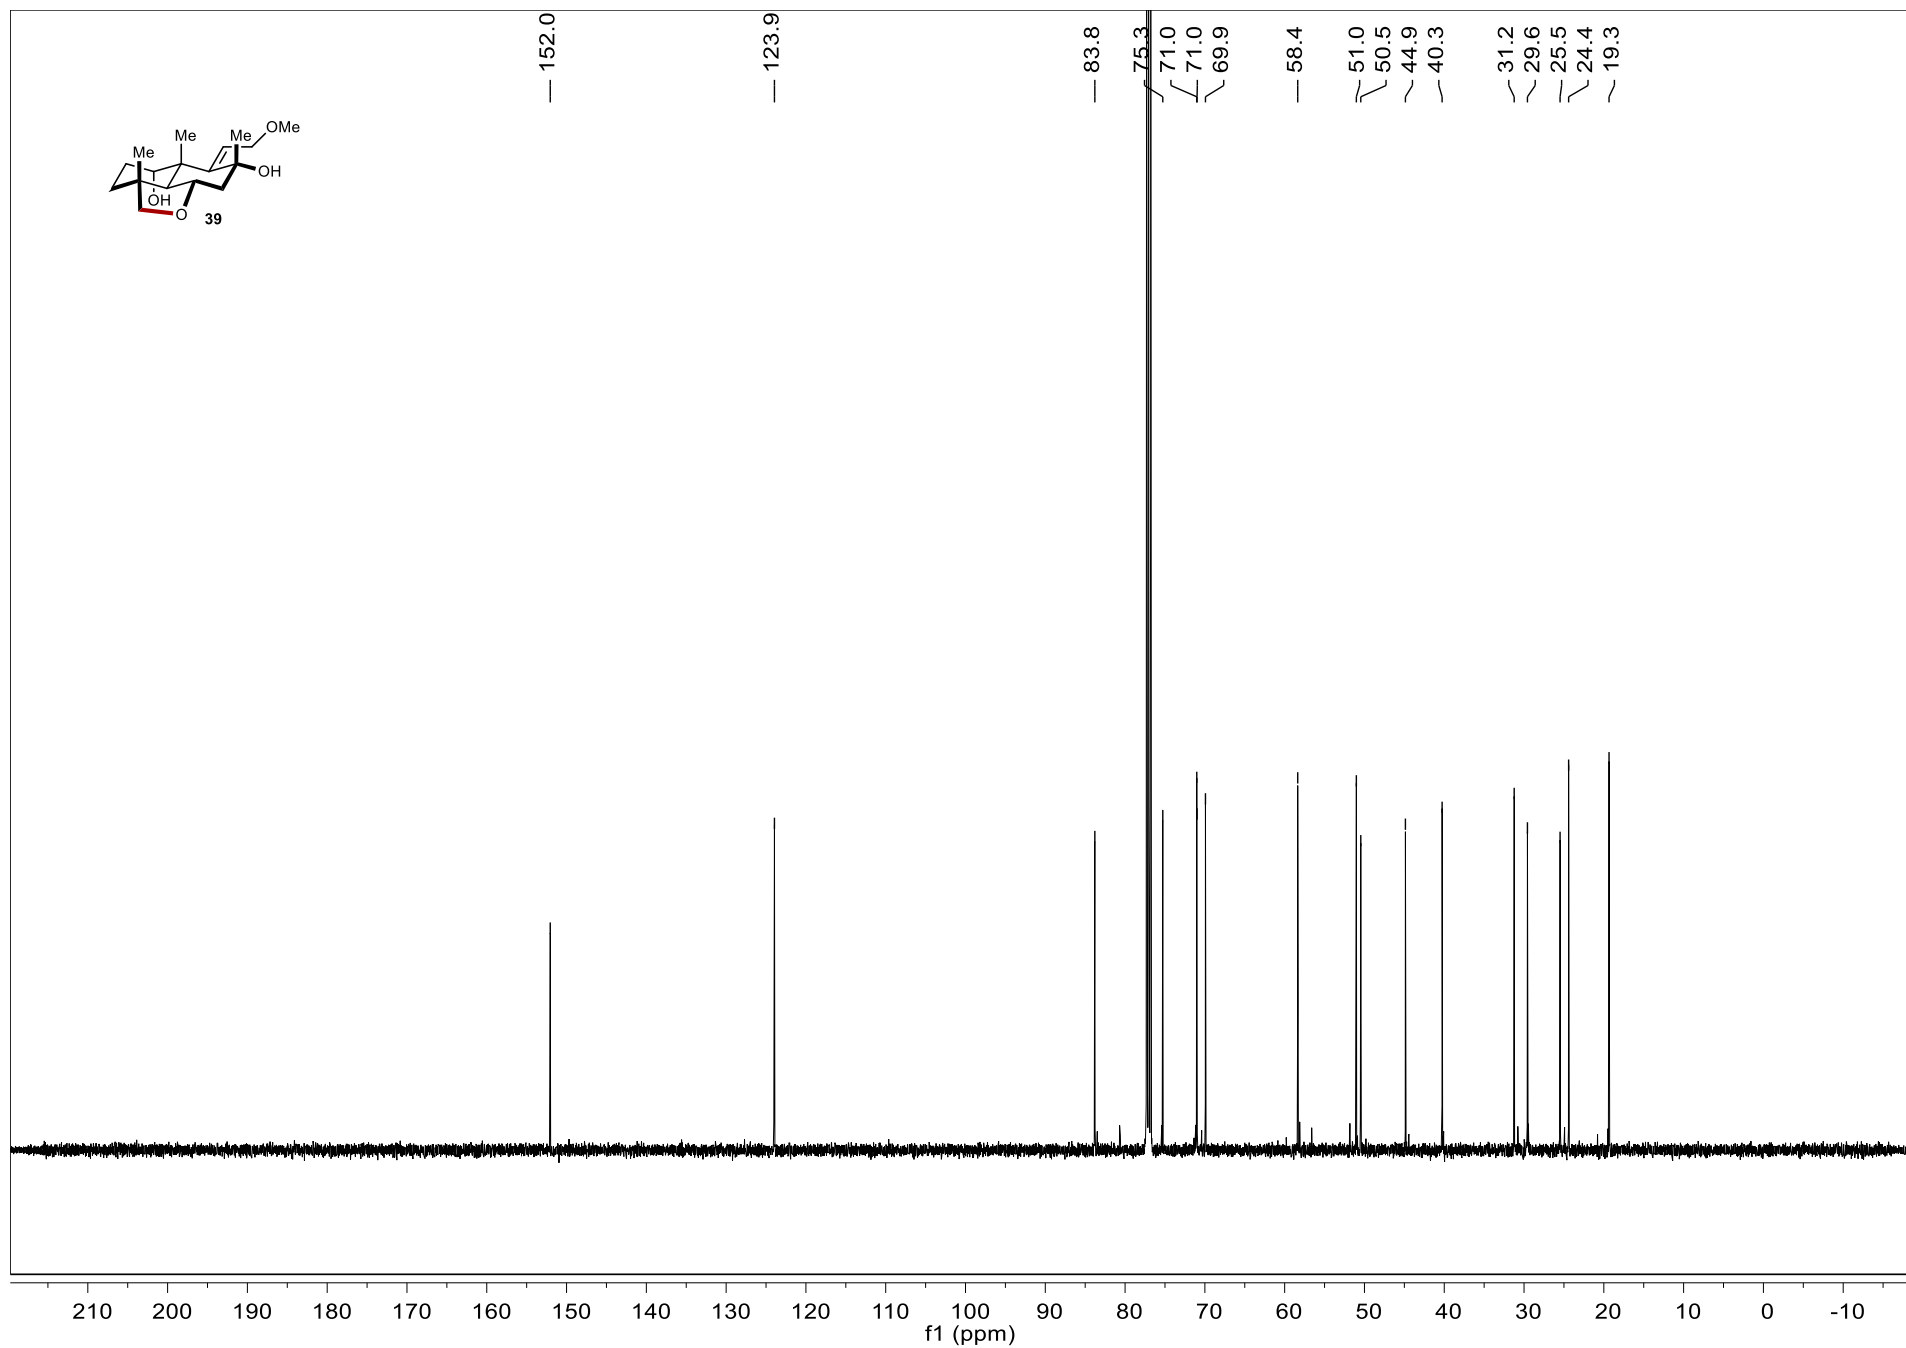

**$^1\text{H}$  NMR Spectrum of compound 40 (500 MHz,  $\text{CDCl}_3$ )**

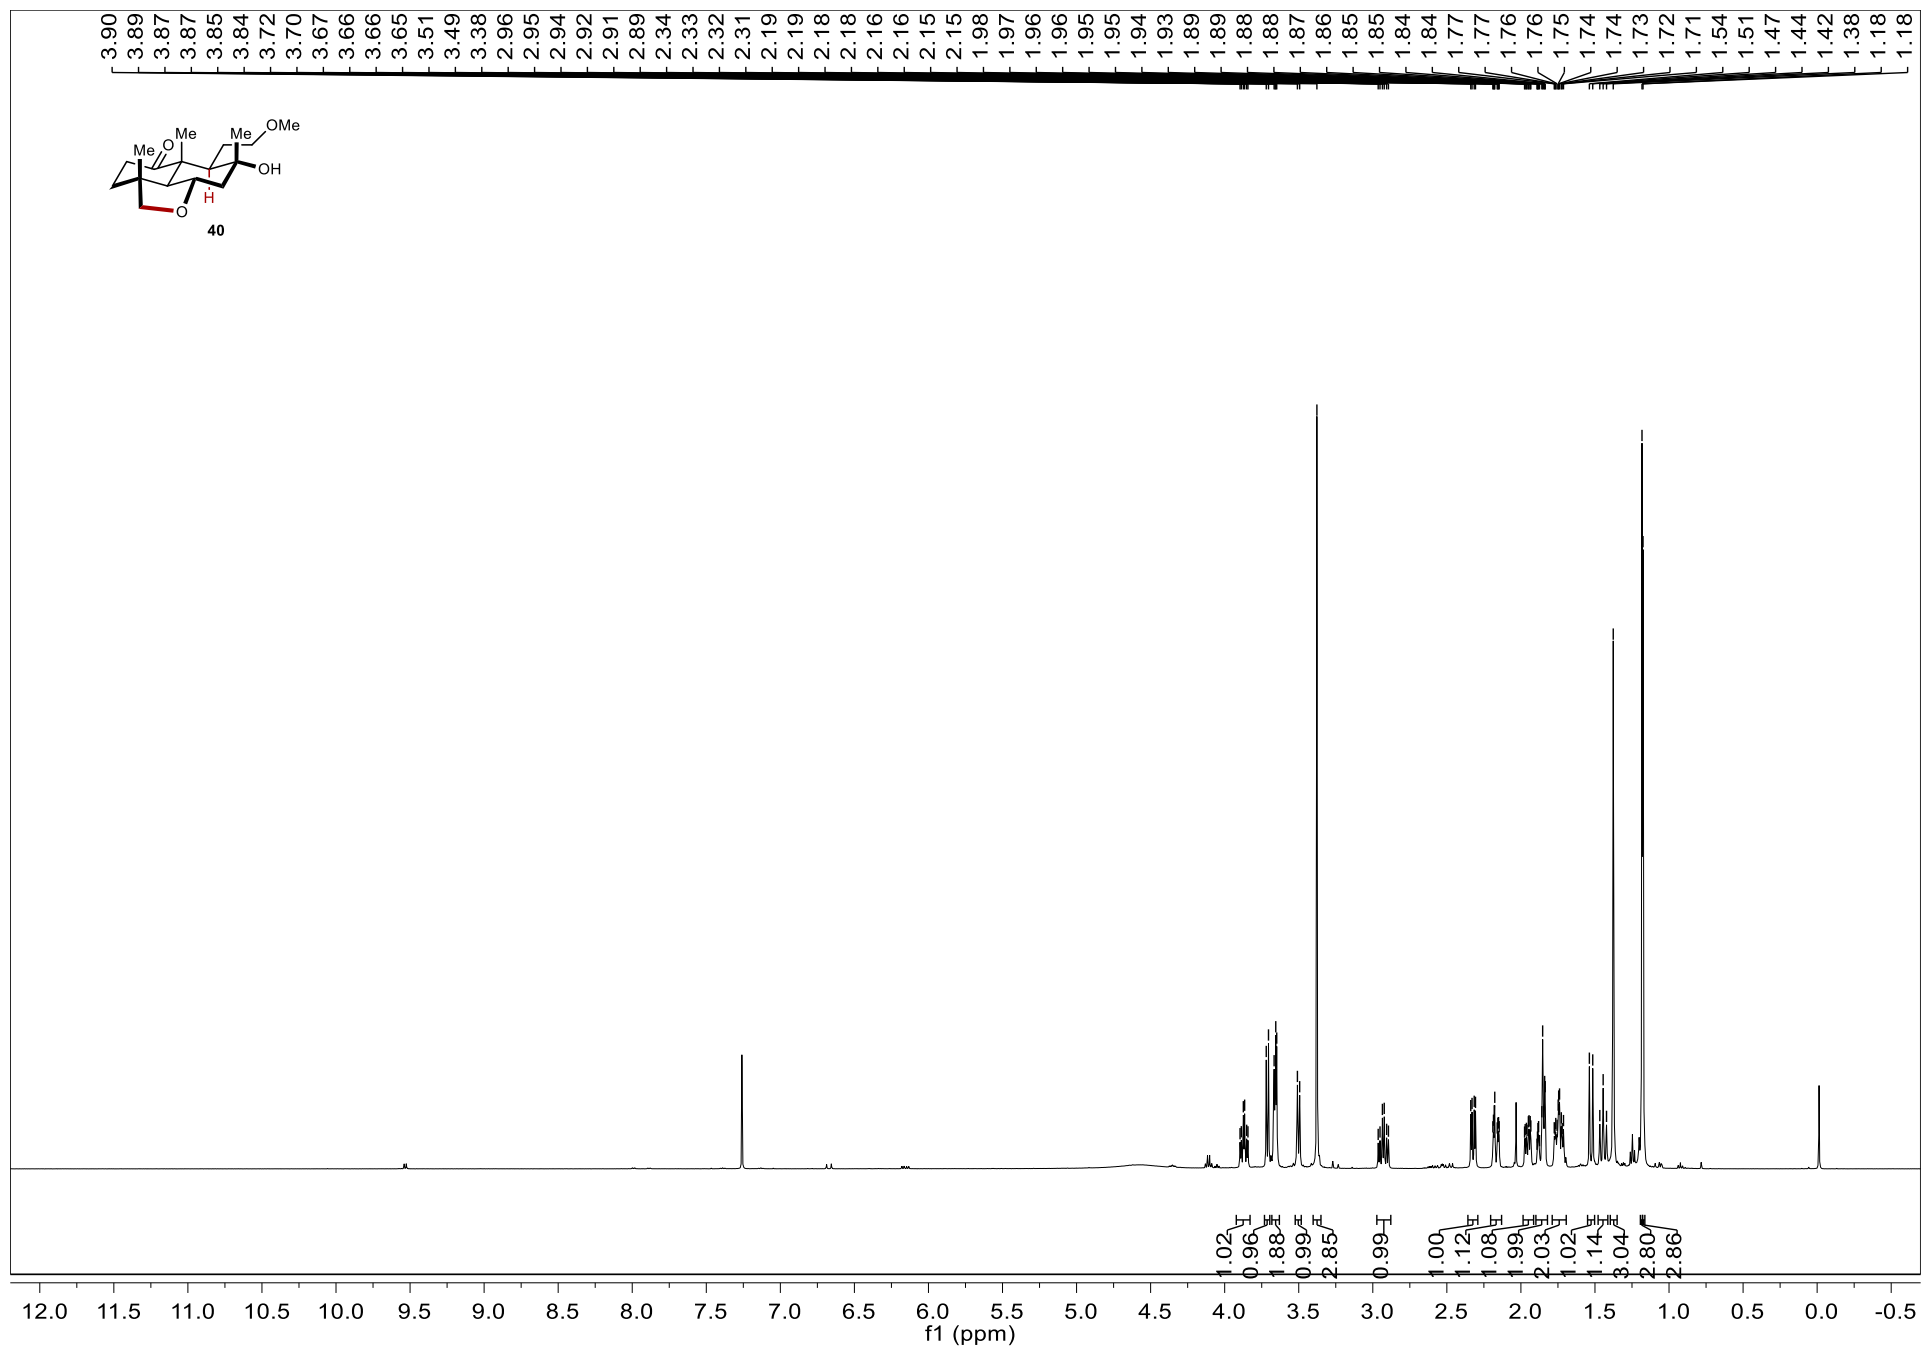

**$^{13}\text{C}$  NMR Spectrum of compound 40 (126 MHz,  $\text{CDCl}_3$ )**

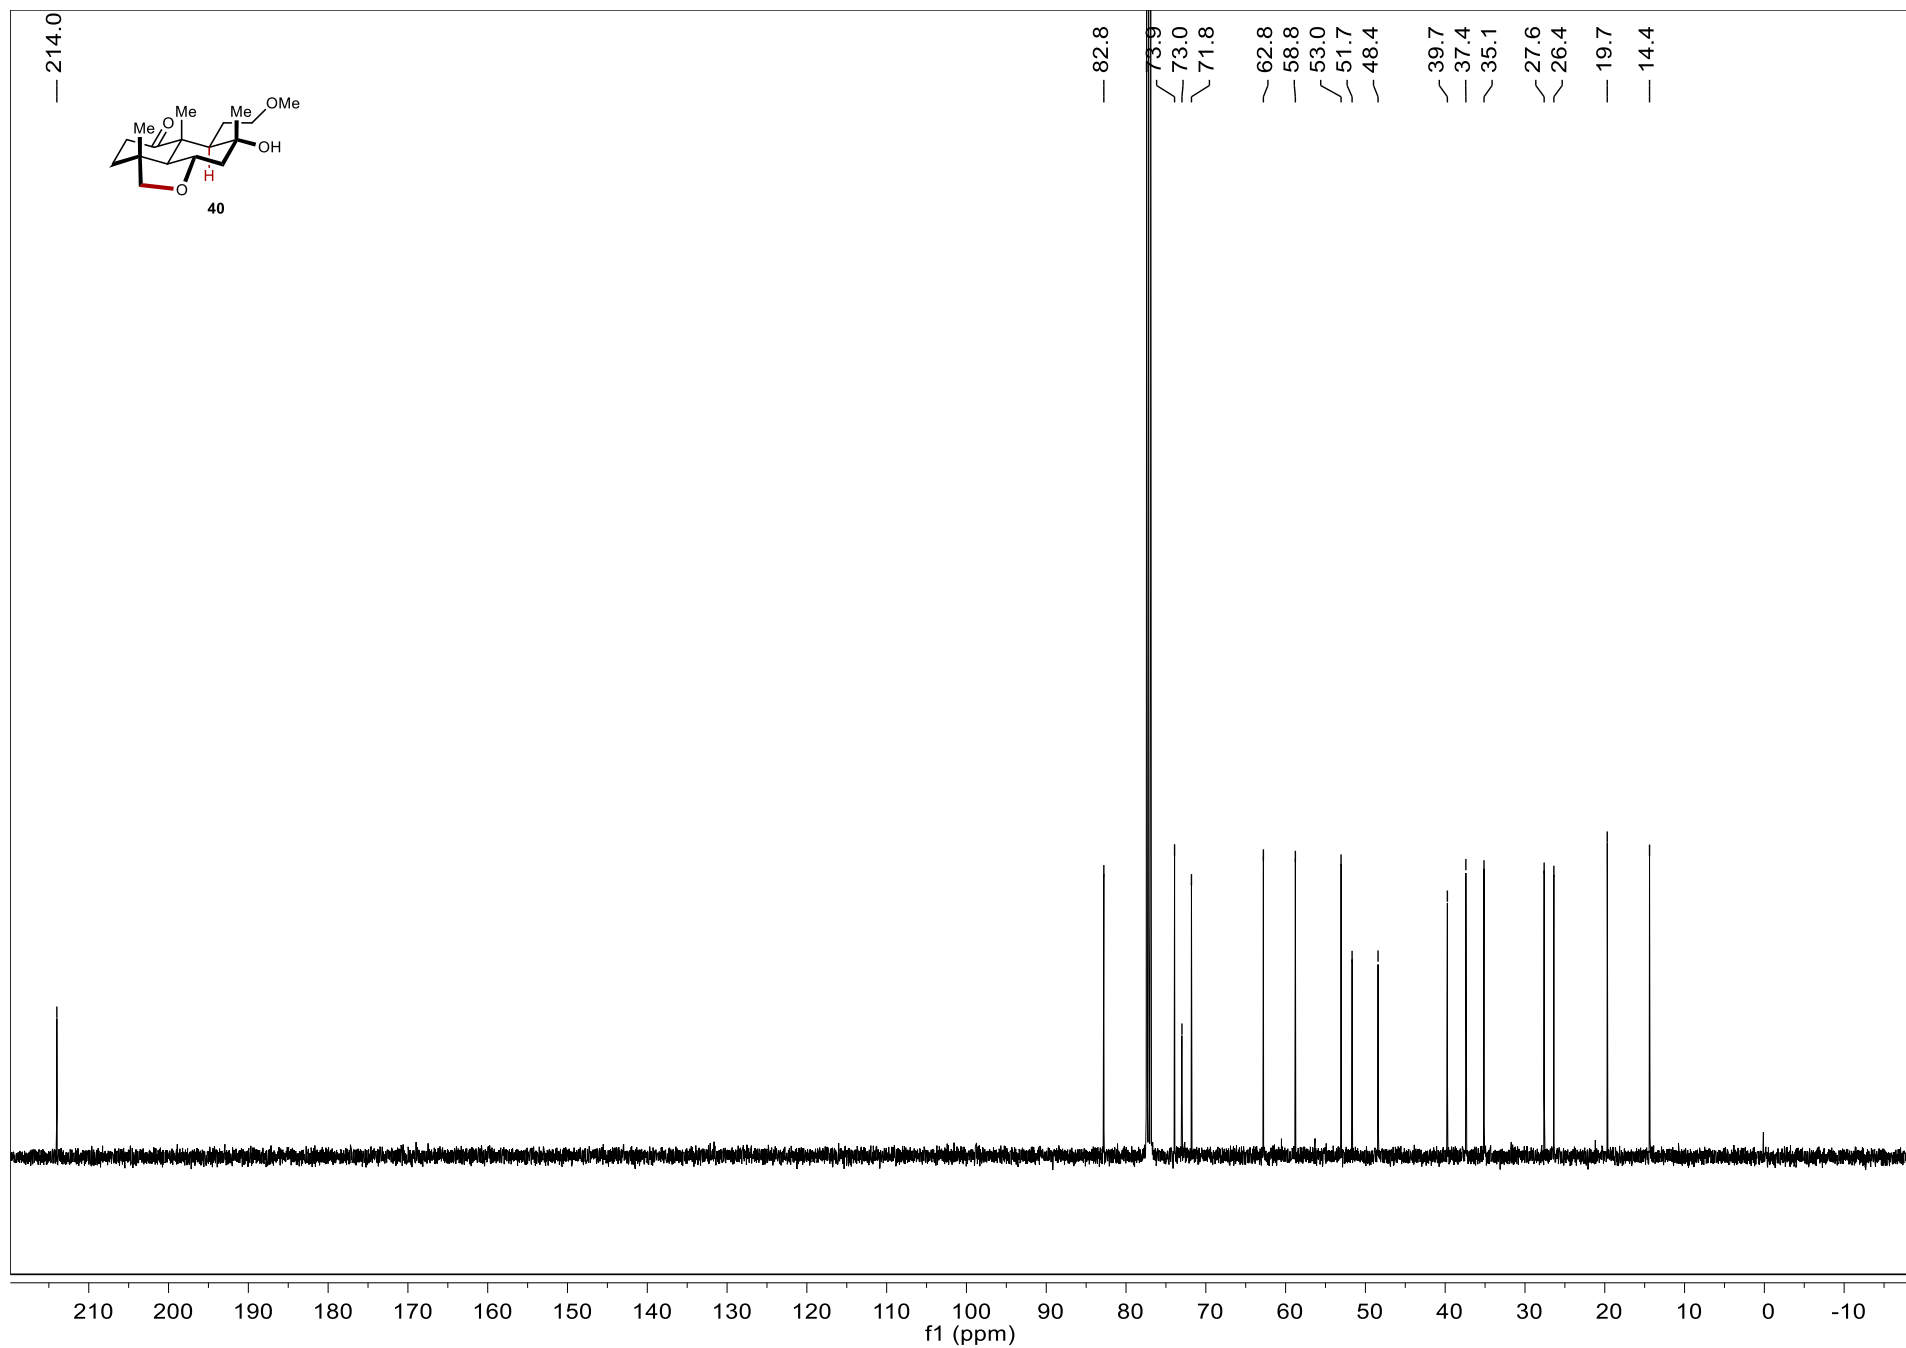

**$^1\text{H}$  NMR Spectrum of compound 41 (500 MHz,  $\text{CDCl}_3$ )**

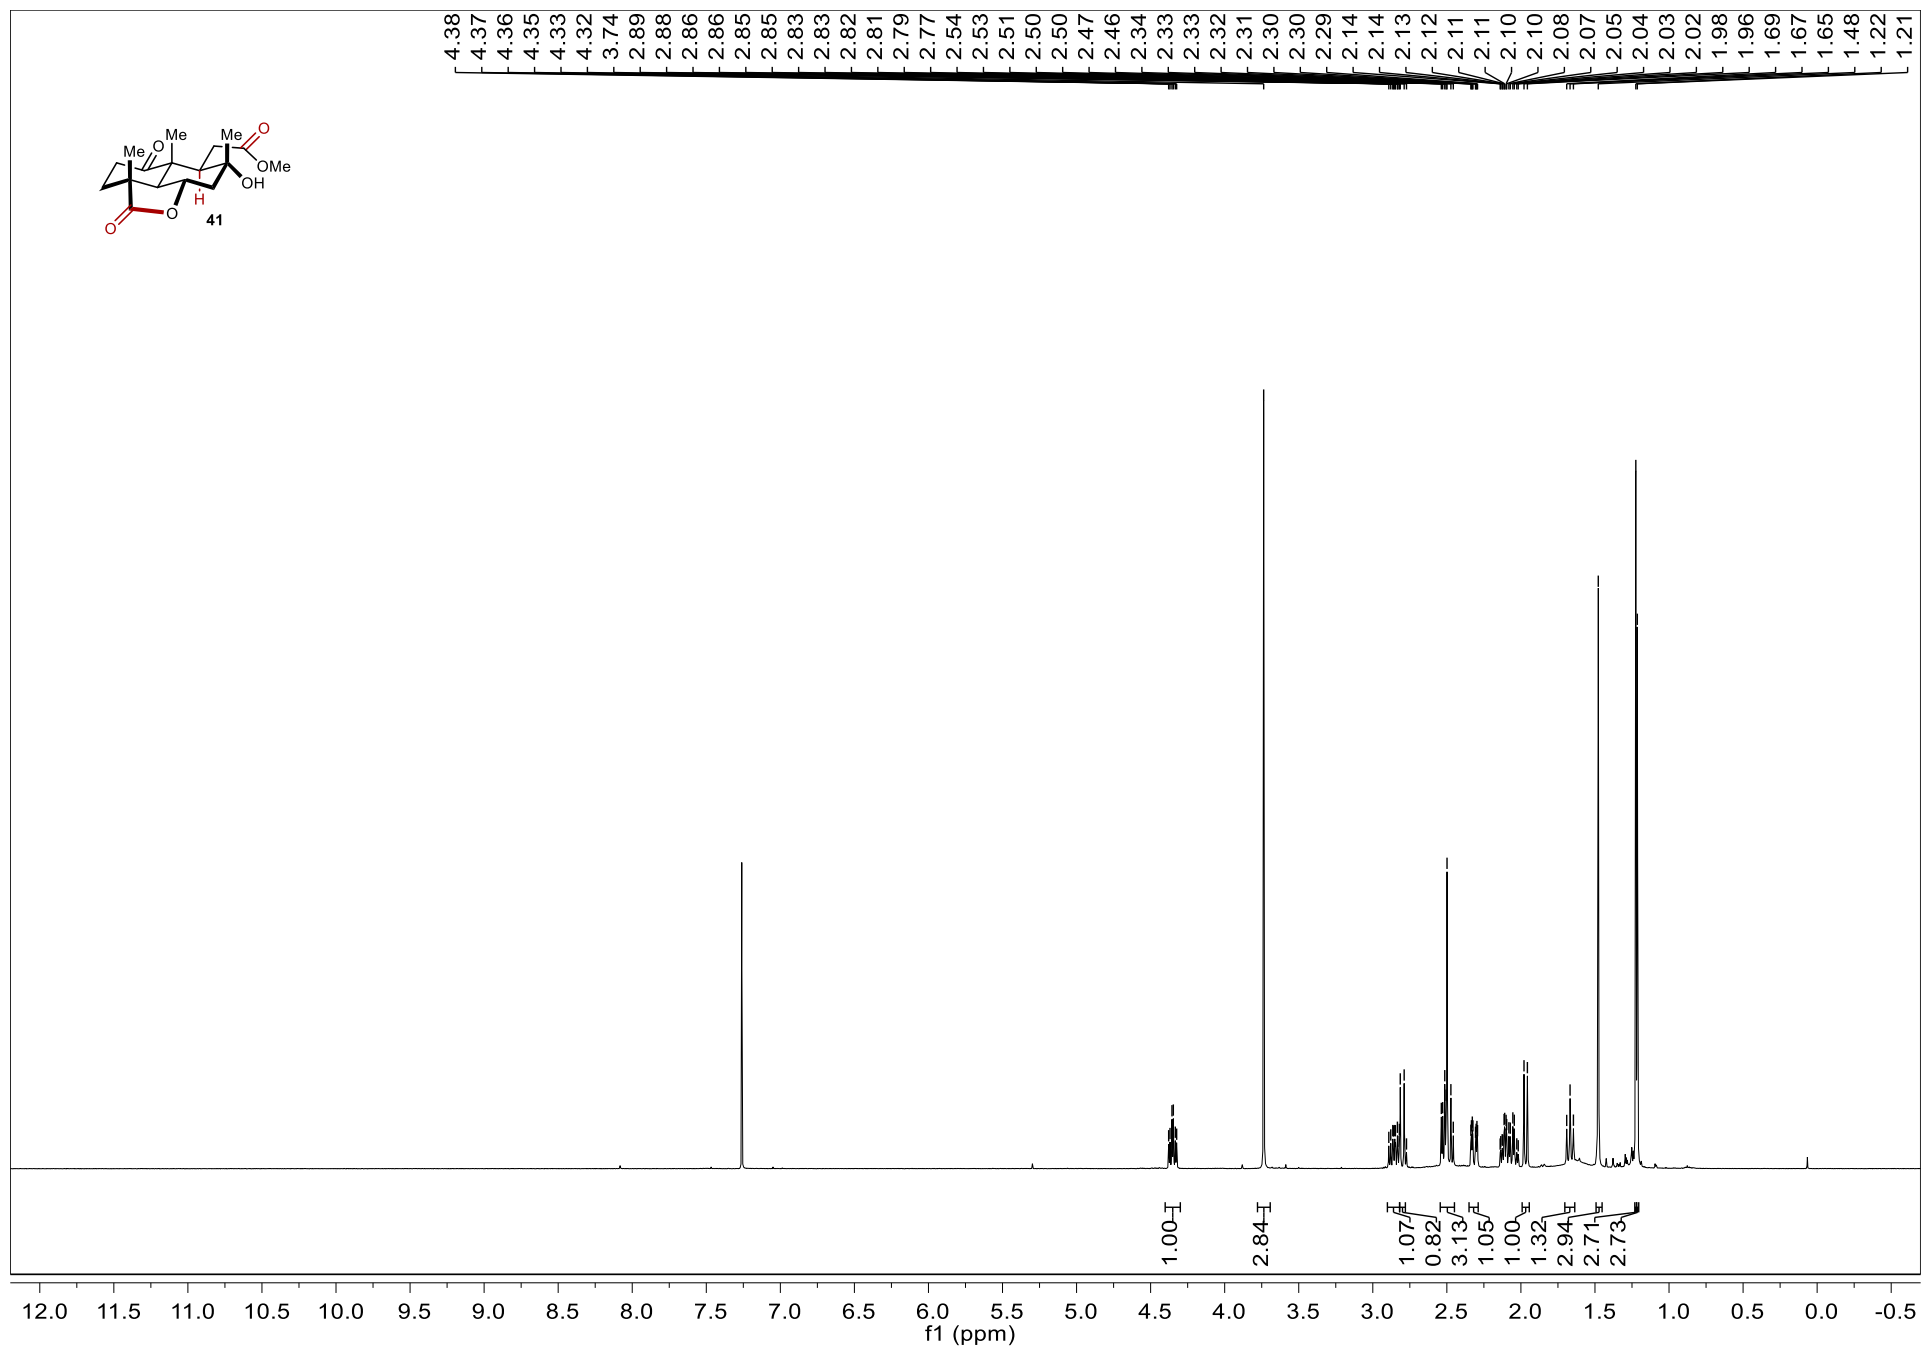

**$^{13}\text{C}$  NMR Spectrum of compound 41 (126 MHz,  $\text{CDCl}_3$ )**

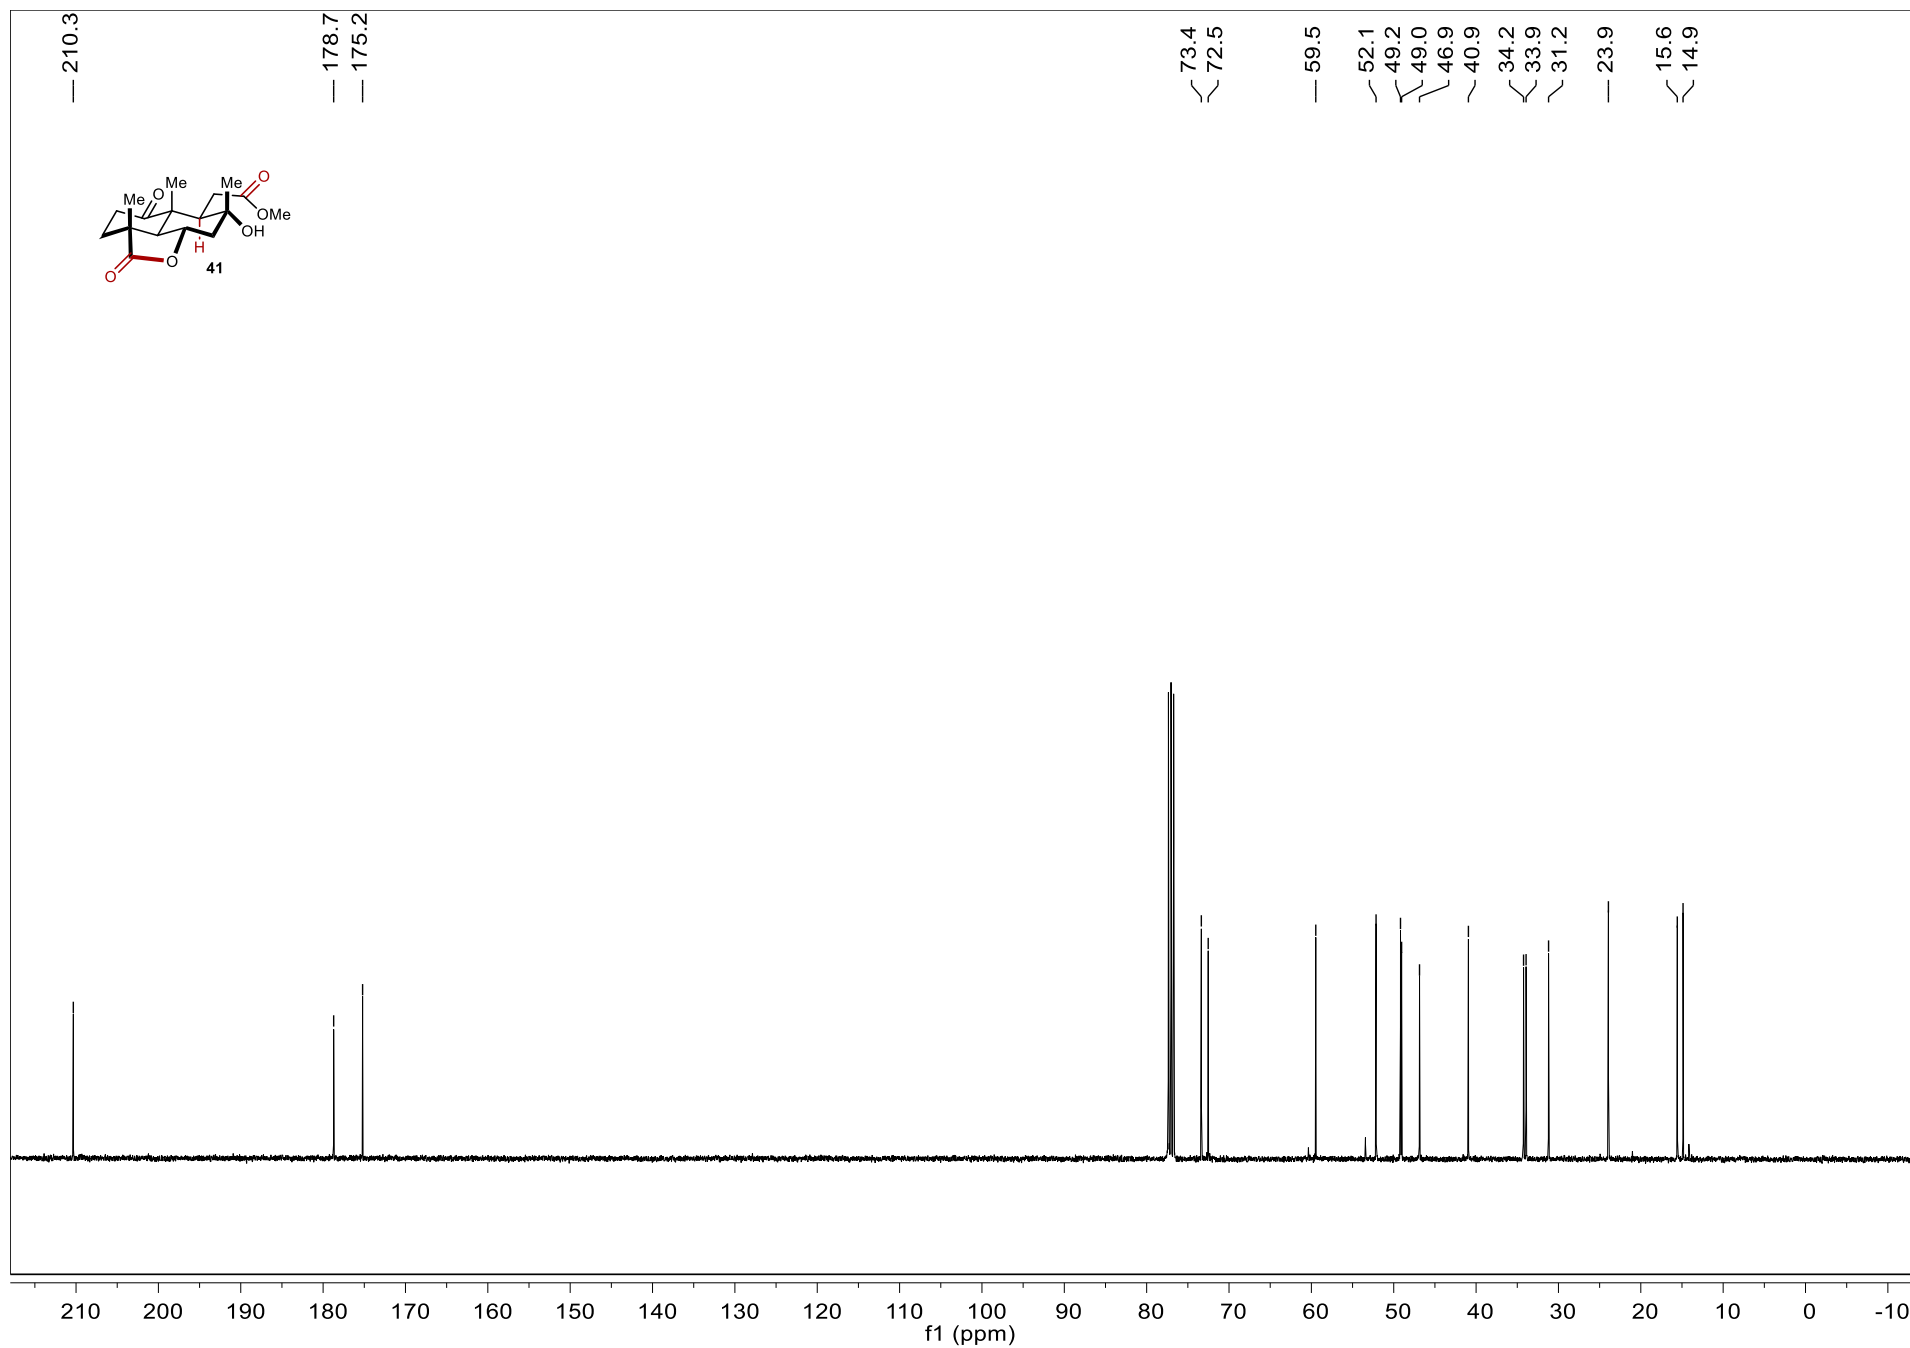

**<sup>1</sup>H NMR Spectrum of compound S7 (500 MHz, CDCl<sub>3</sub>)**

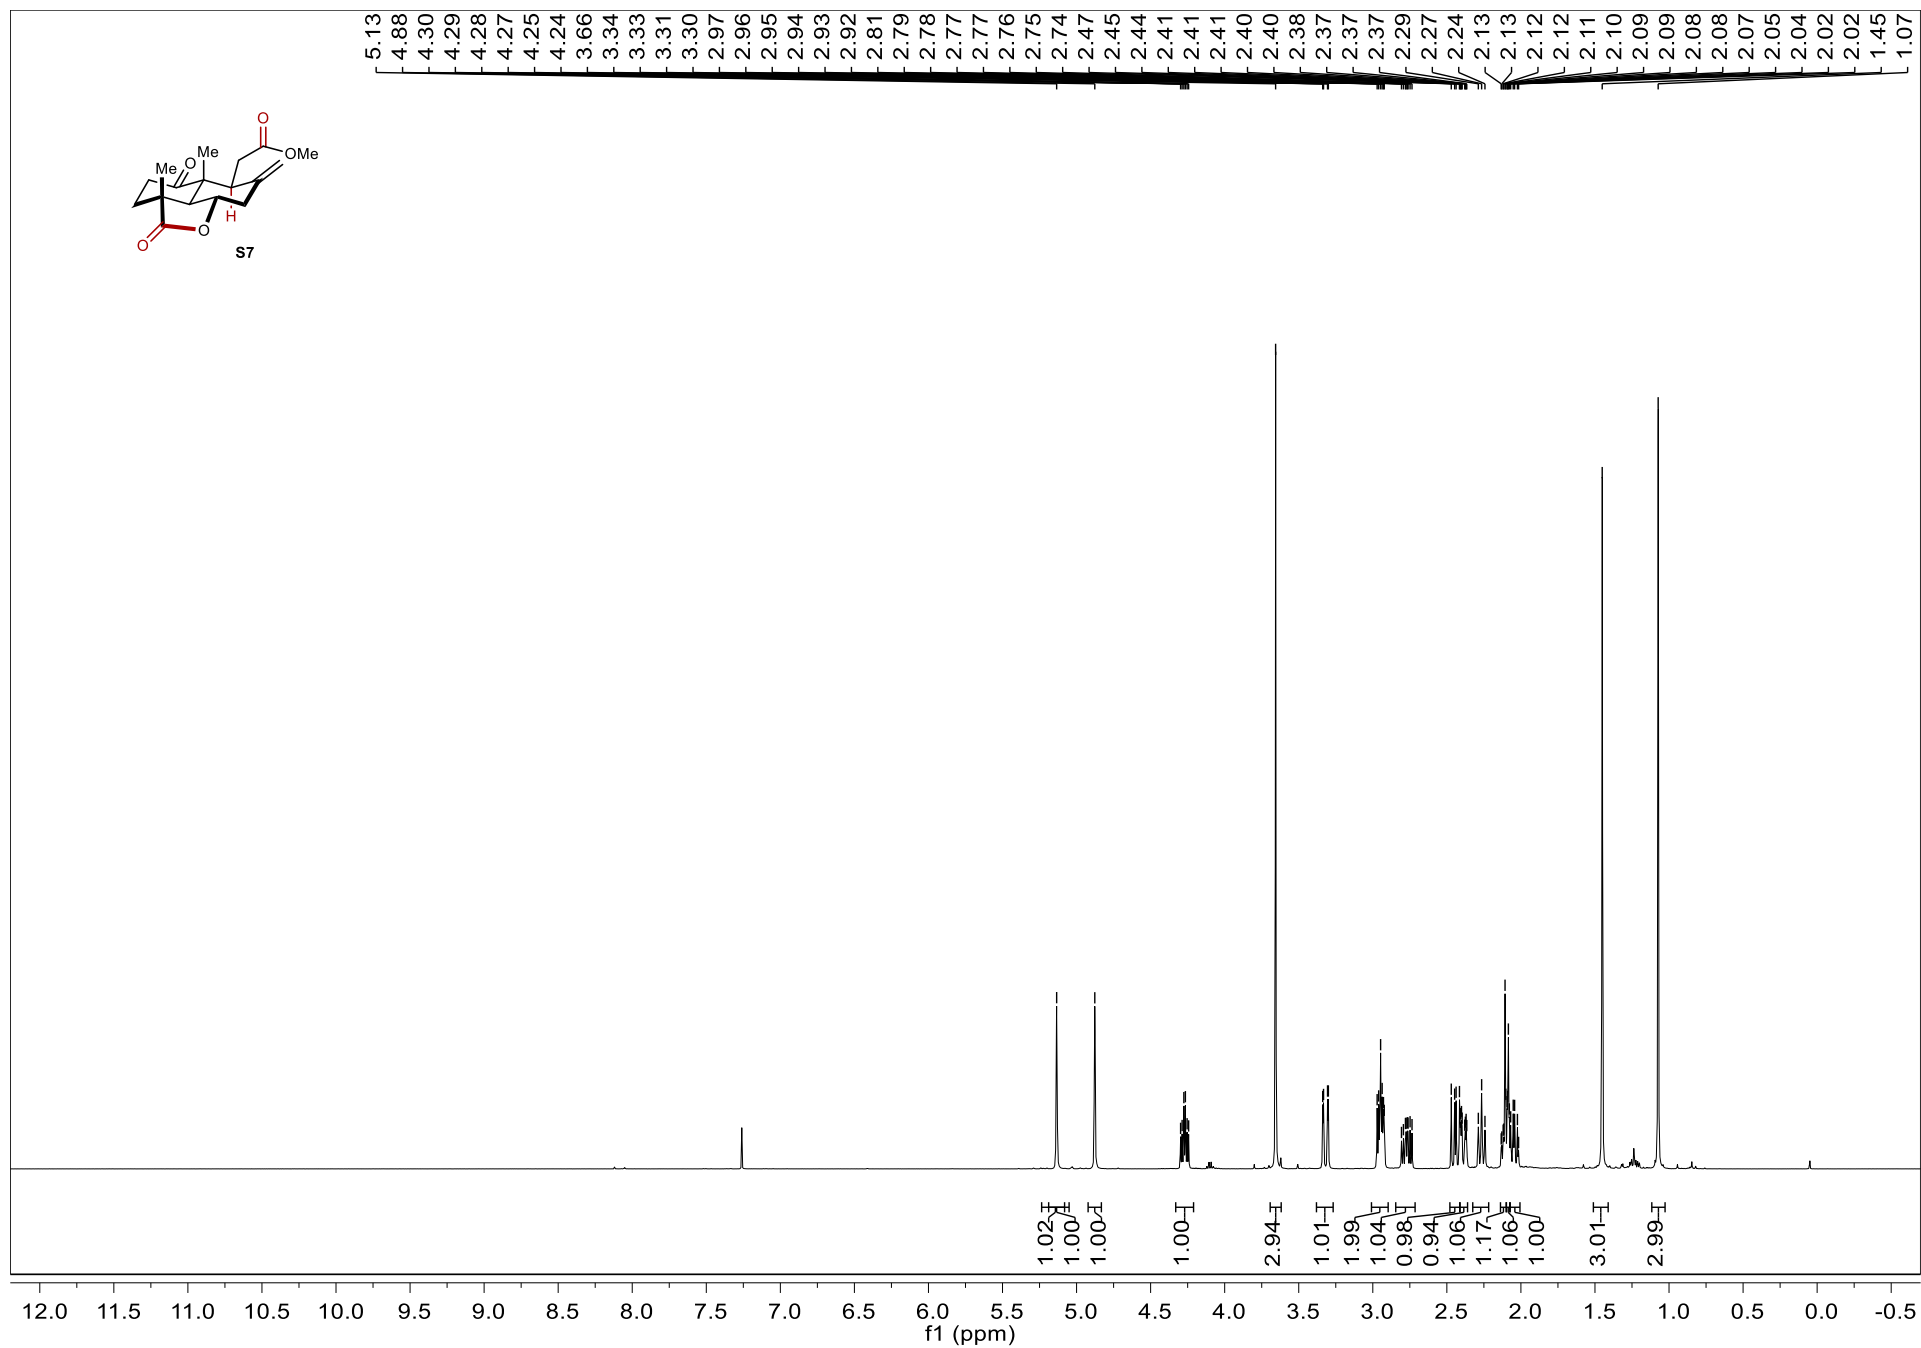

**<sup>13</sup>C NMR Spectrum of compound S7 (126 MHz, CDCl<sub>3</sub>)**

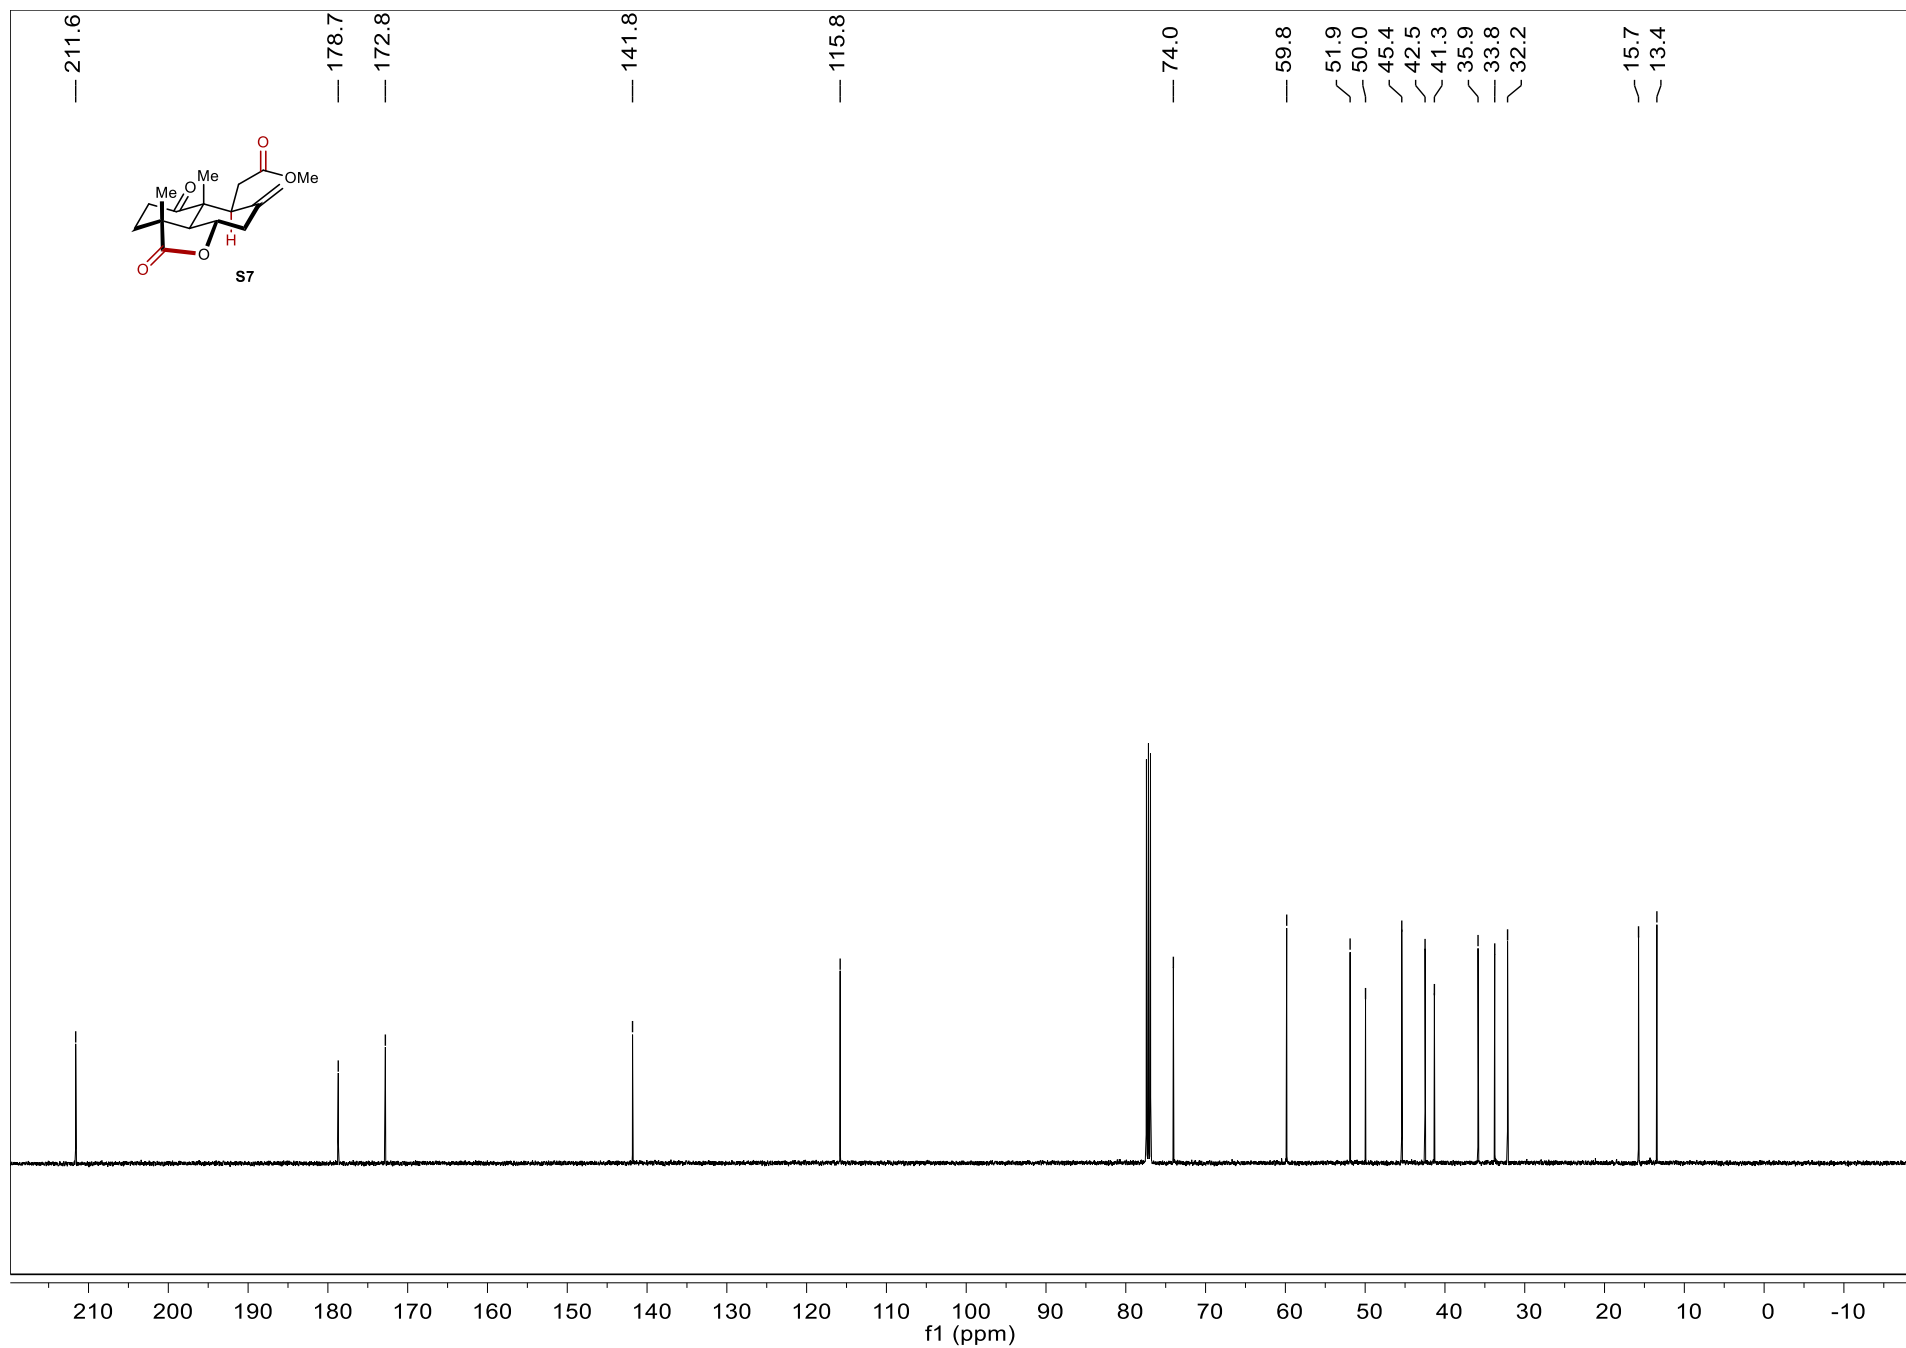



<sup>1</sup>H NMR Spectrum of compound 42 (500 MHz, CDCl<sub>3</sub>)

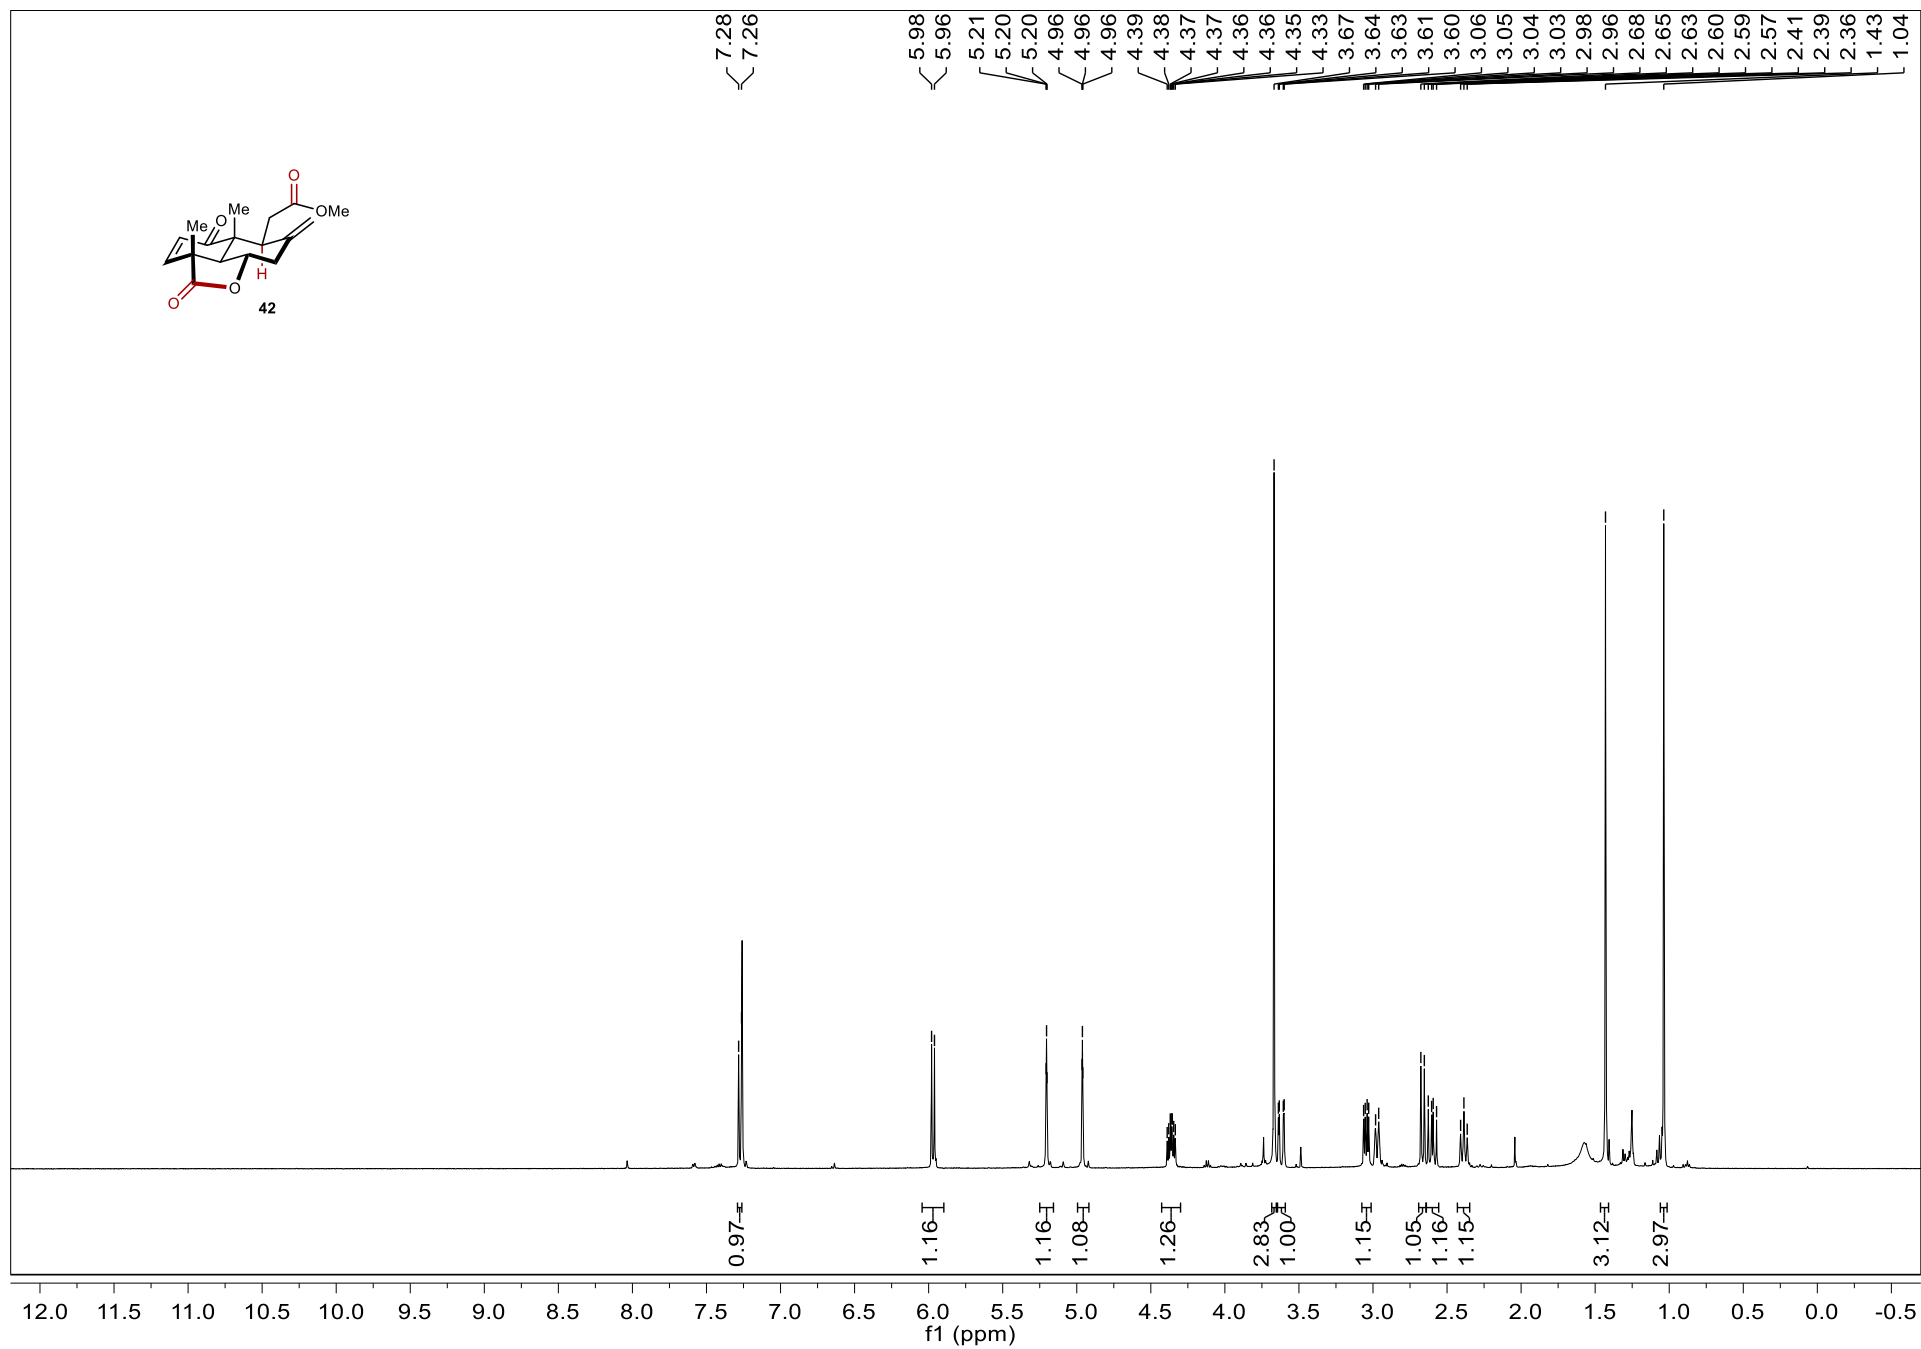

**$^{13}\text{C}$  NMR Spectrum of compound 42 (126 MHz,  $\text{CDCl}_3$ )**

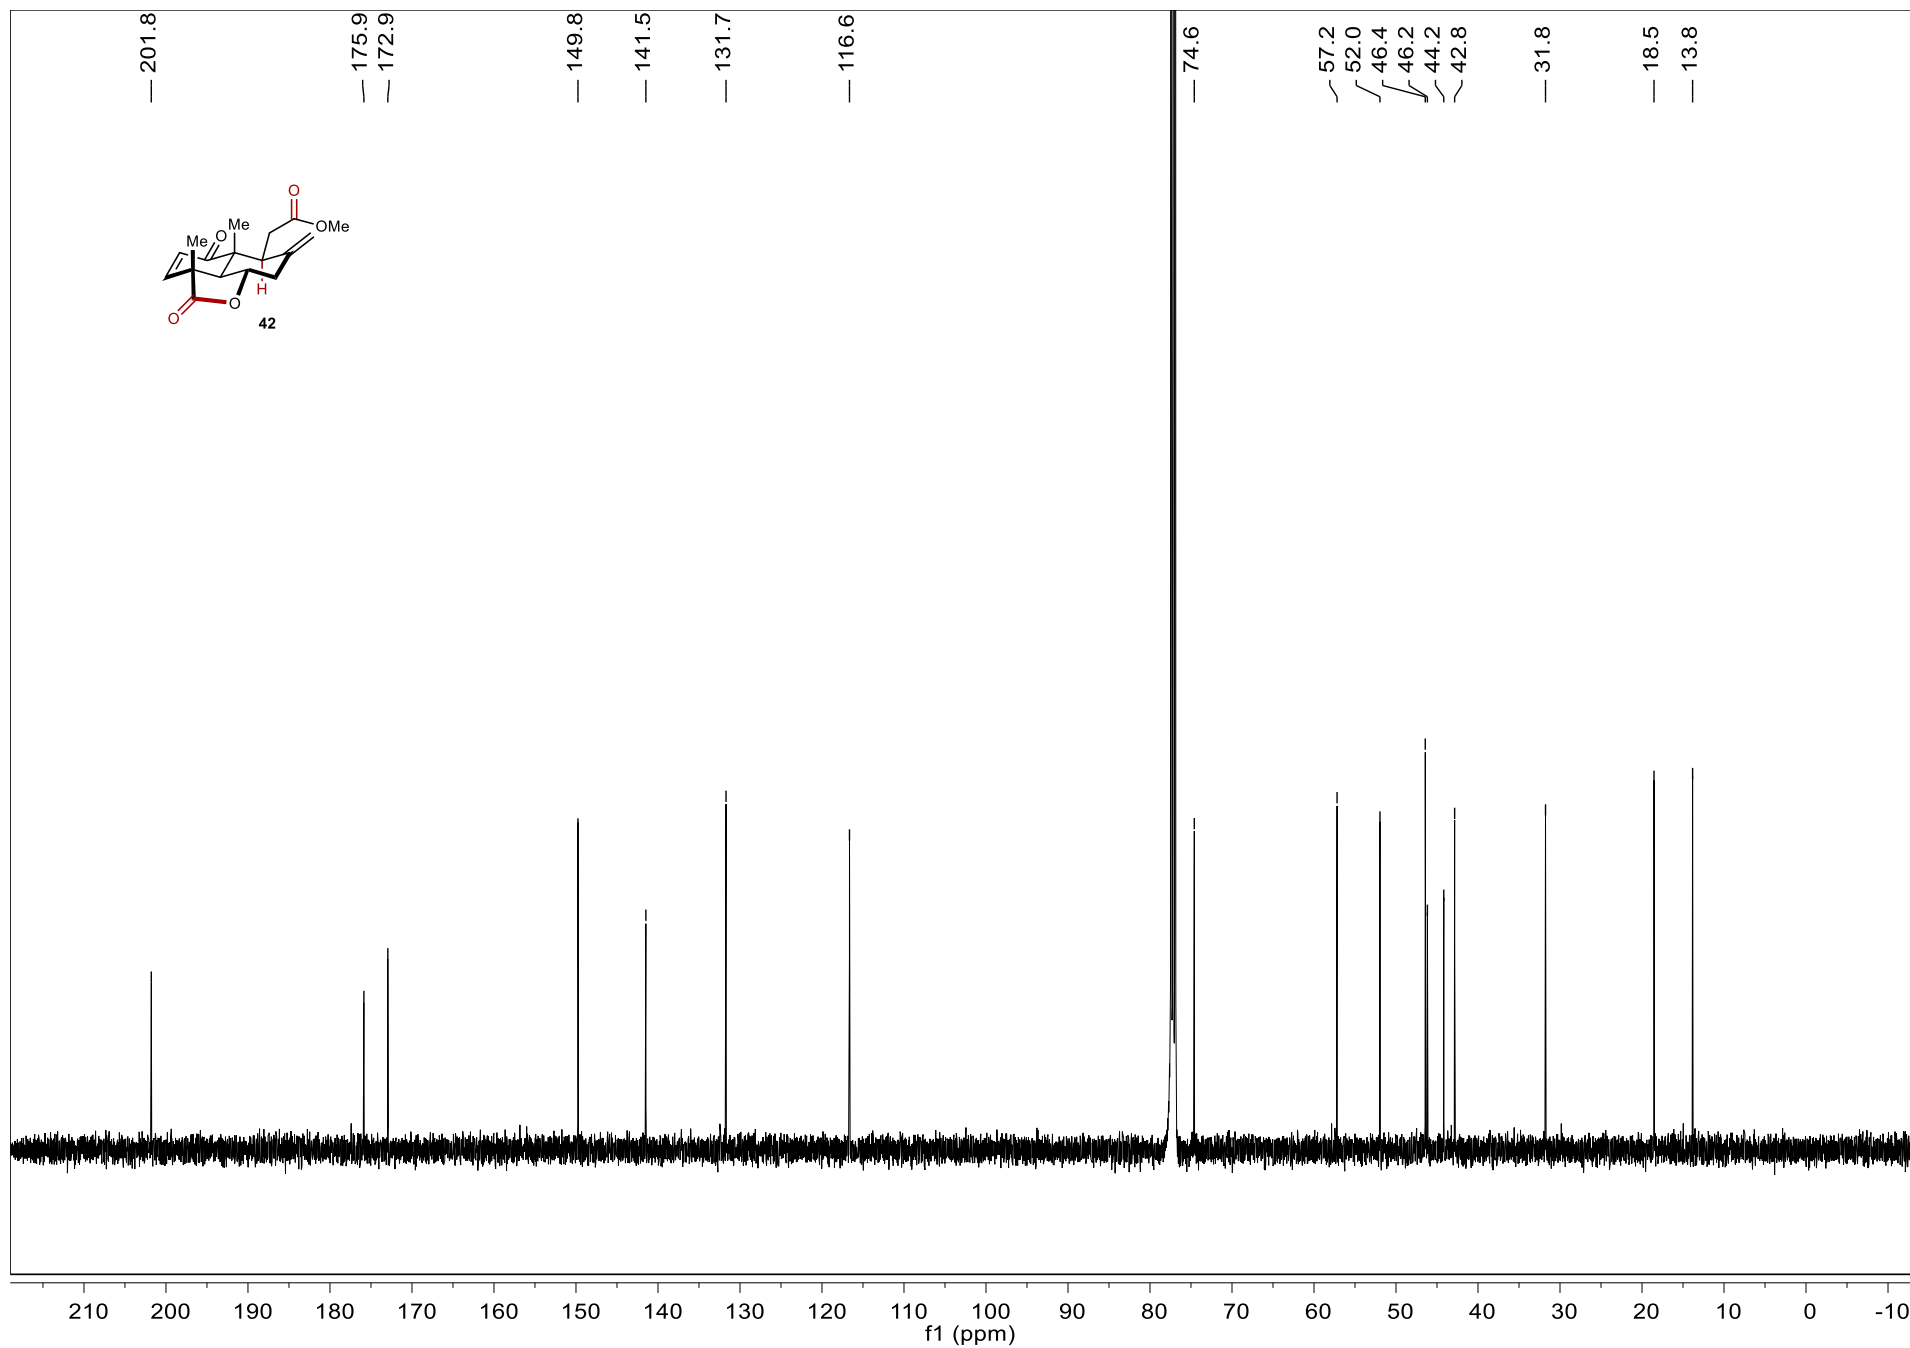

<sup>1</sup>H NMR Spectrum of compound 43 (600 MHz, CDCl<sub>3</sub>)

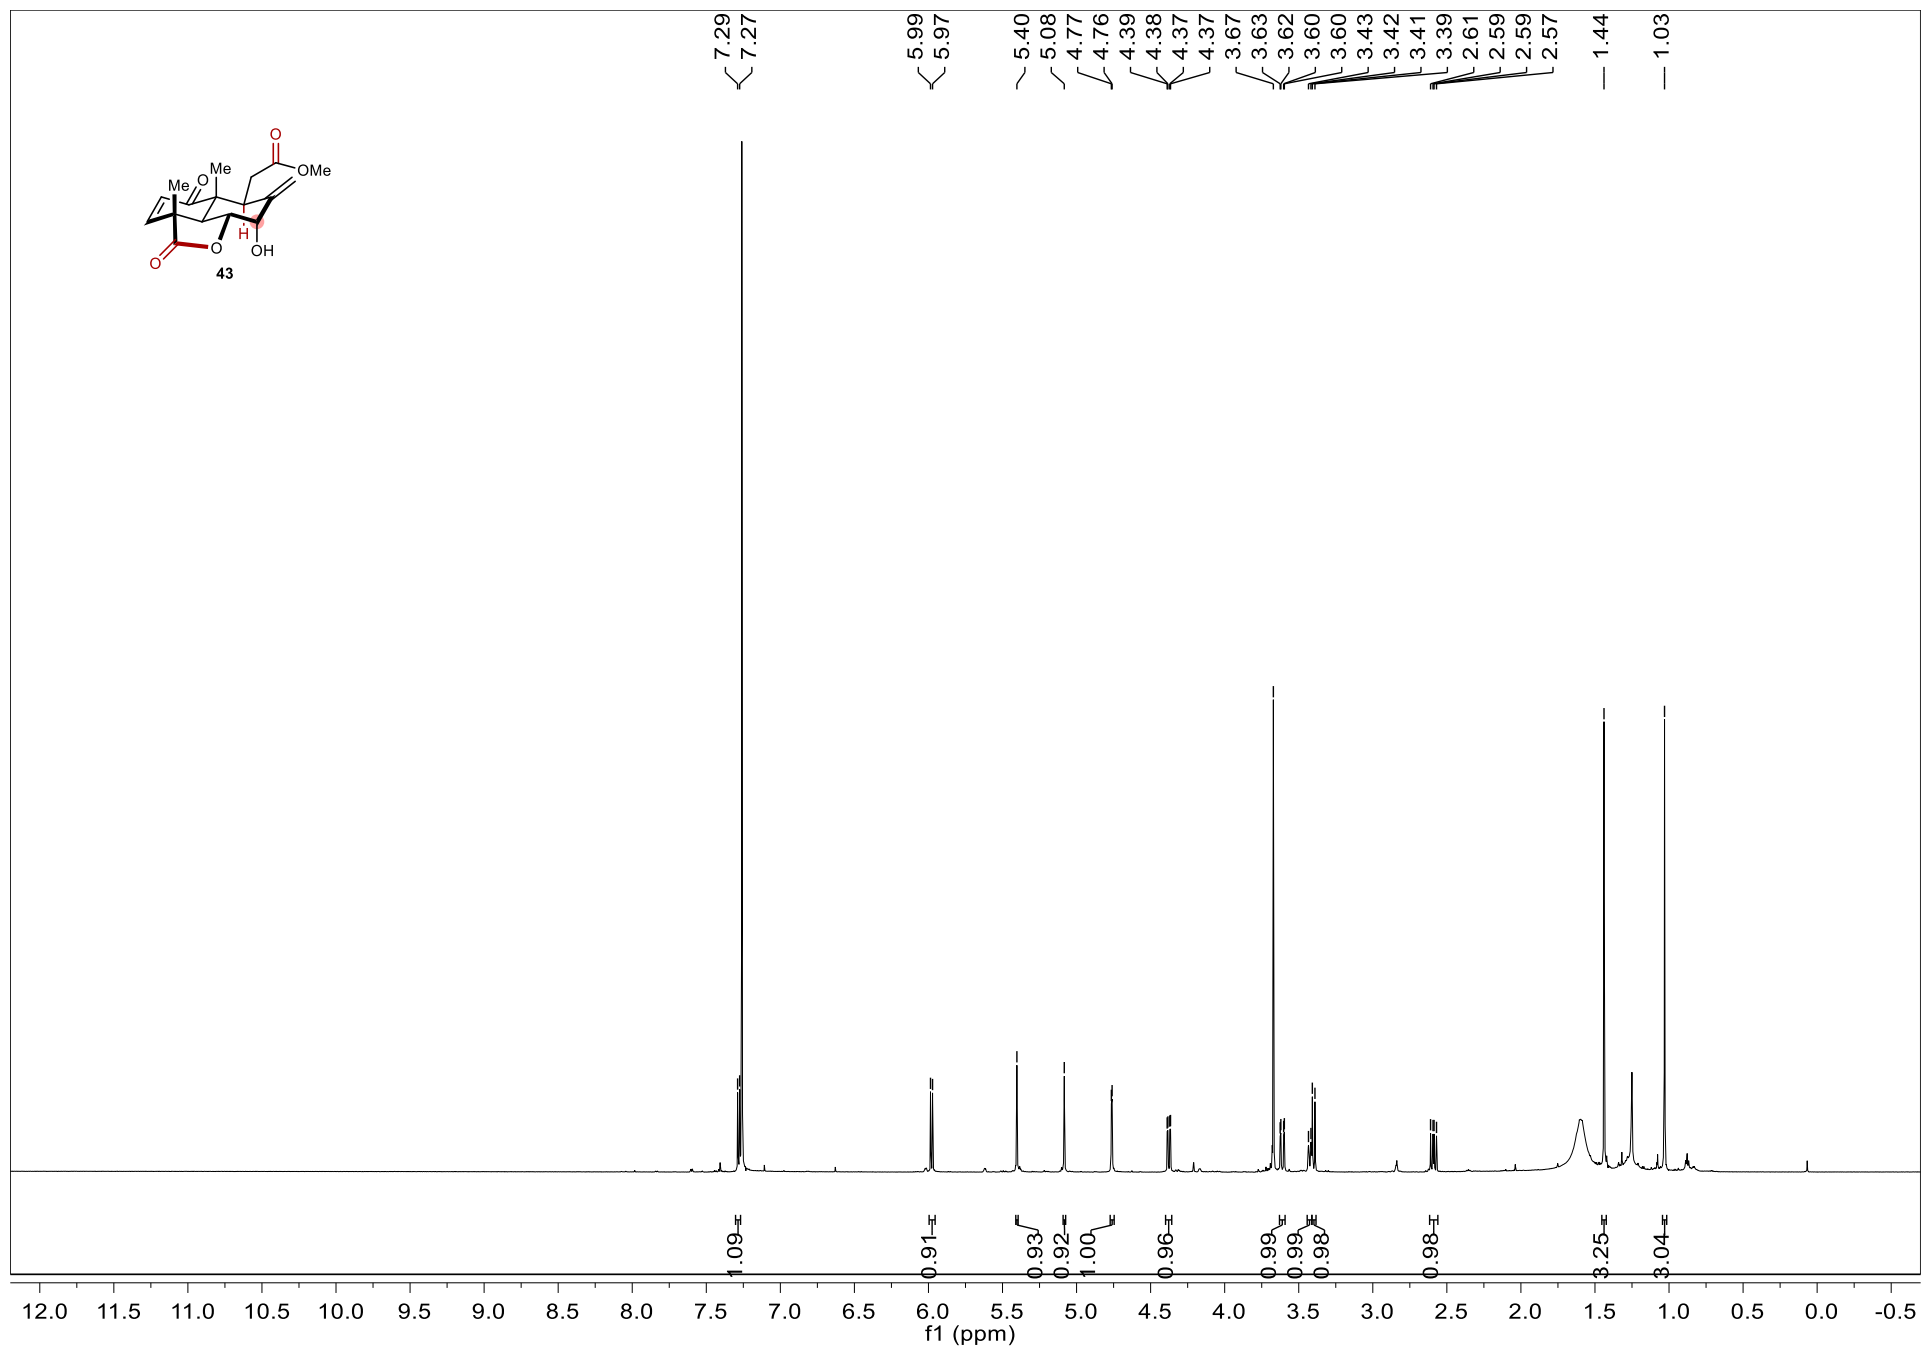

**$^{13}\text{C}$  NMR Spectrum of compound 43 (151 MHz,  $\text{CDCl}_3$ )**

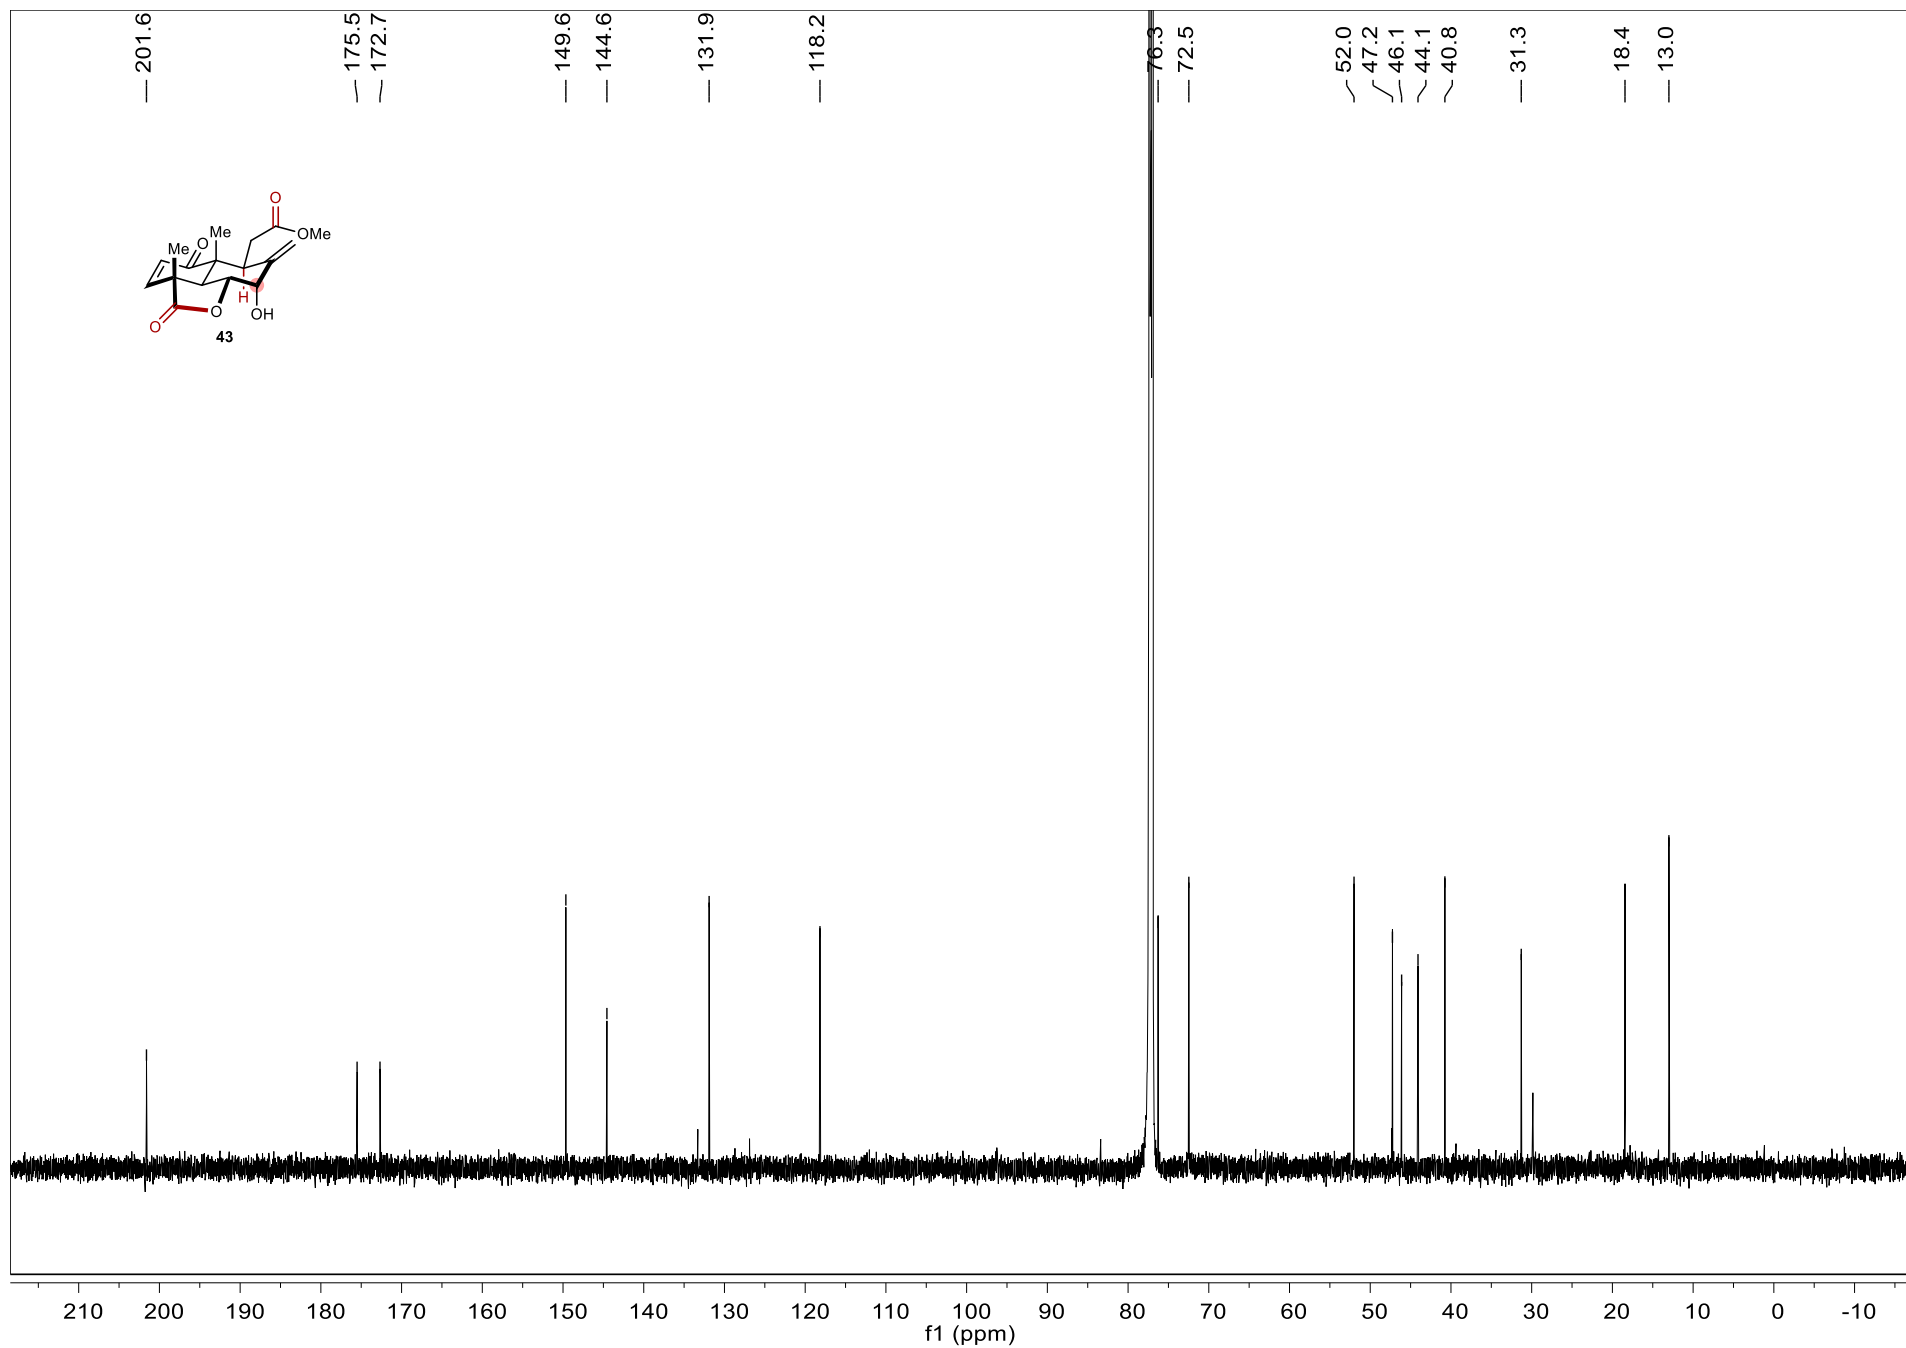

<sup>1</sup>H NMR Spectrum of compound S8 (500 MHz, CDCl<sub>3</sub>)

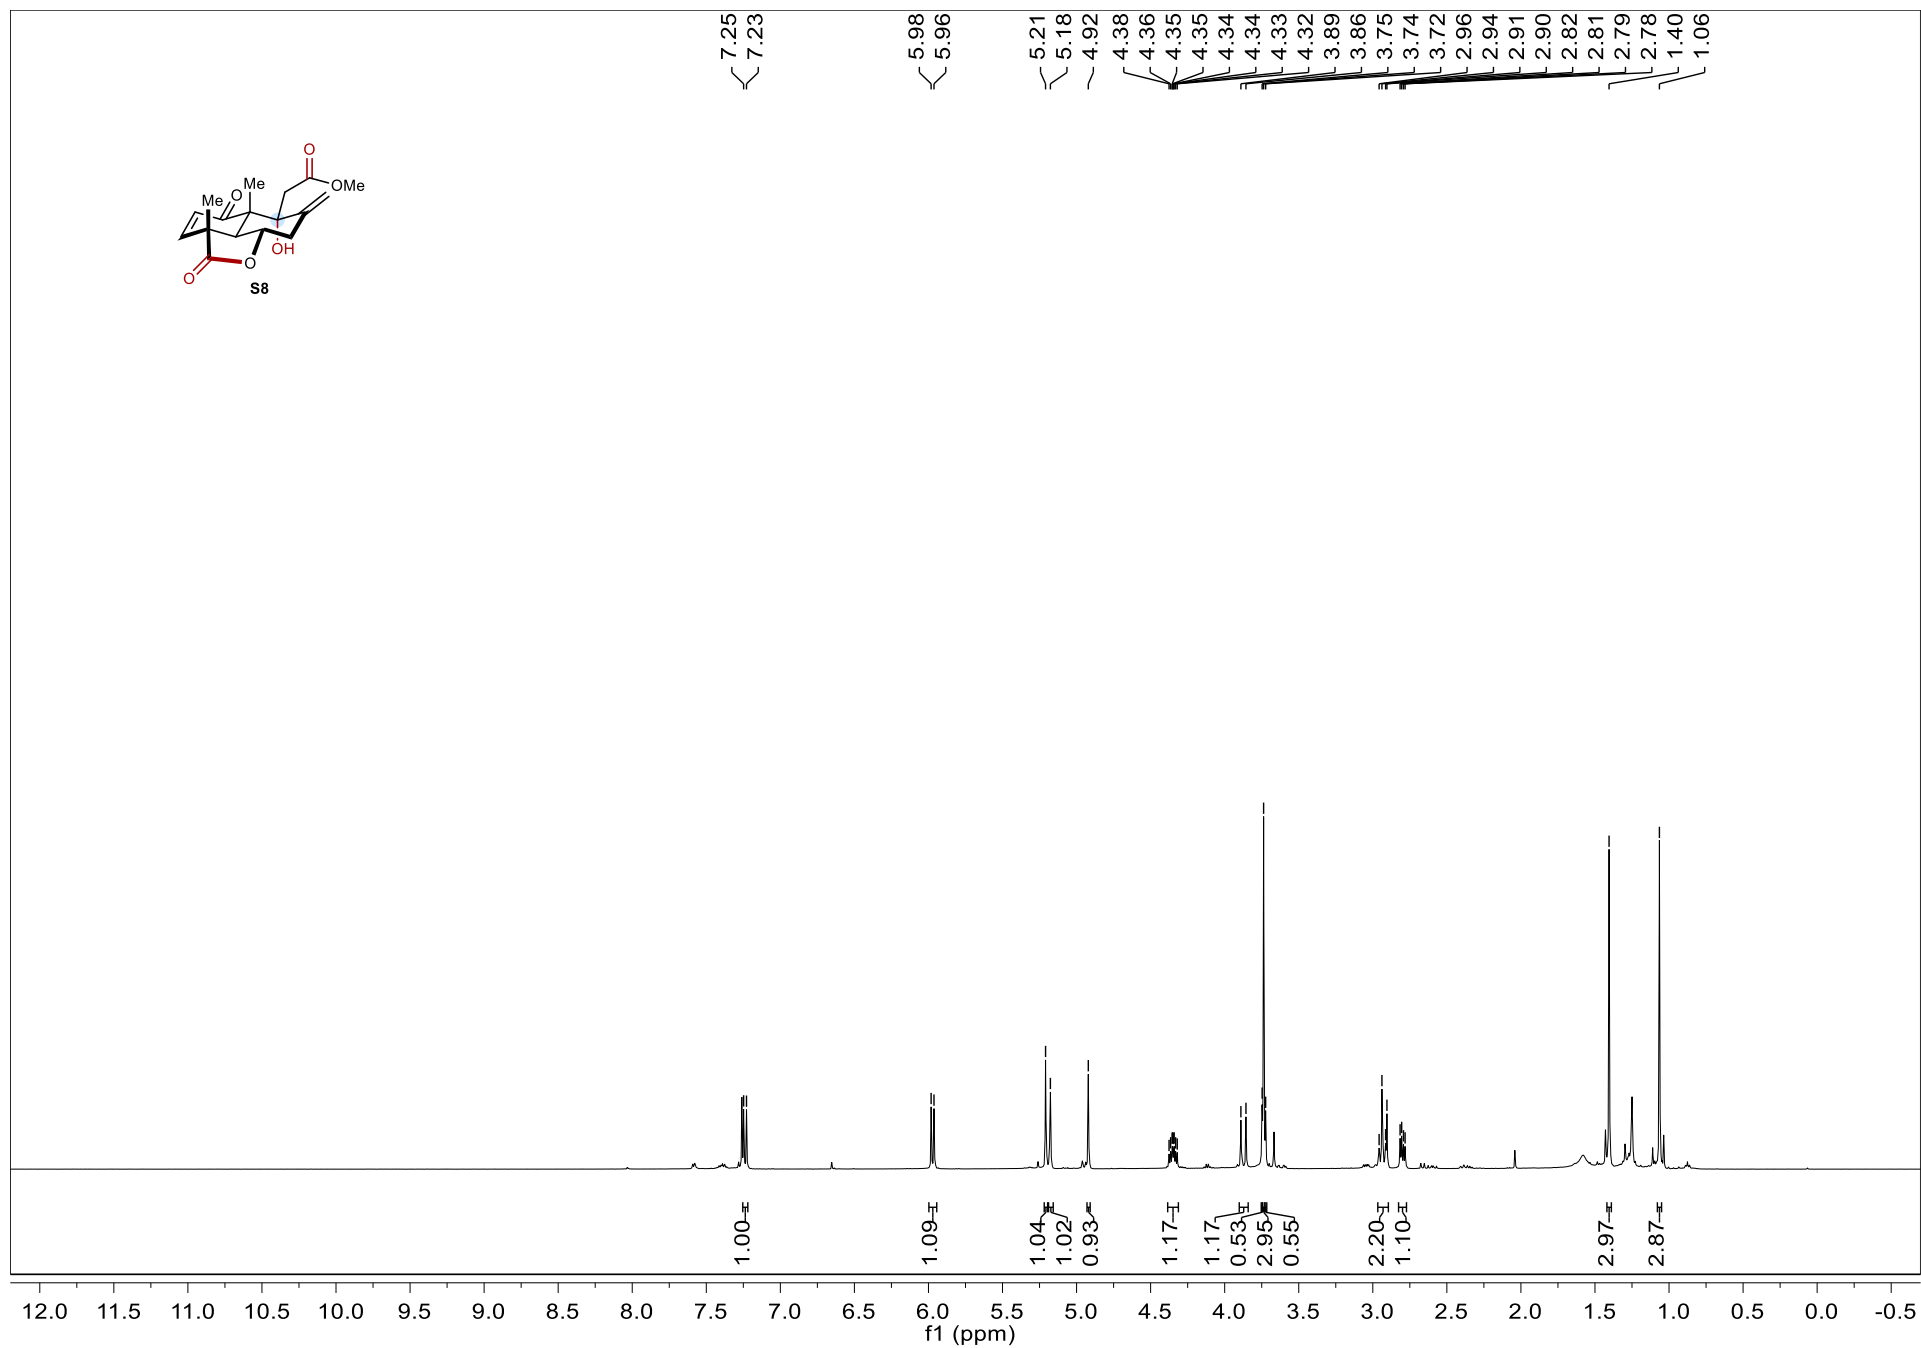

**$^{13}\text{C}$  NMR Spectrum of compound S8 (126 MHz,  $\text{CDCl}_3$ )**

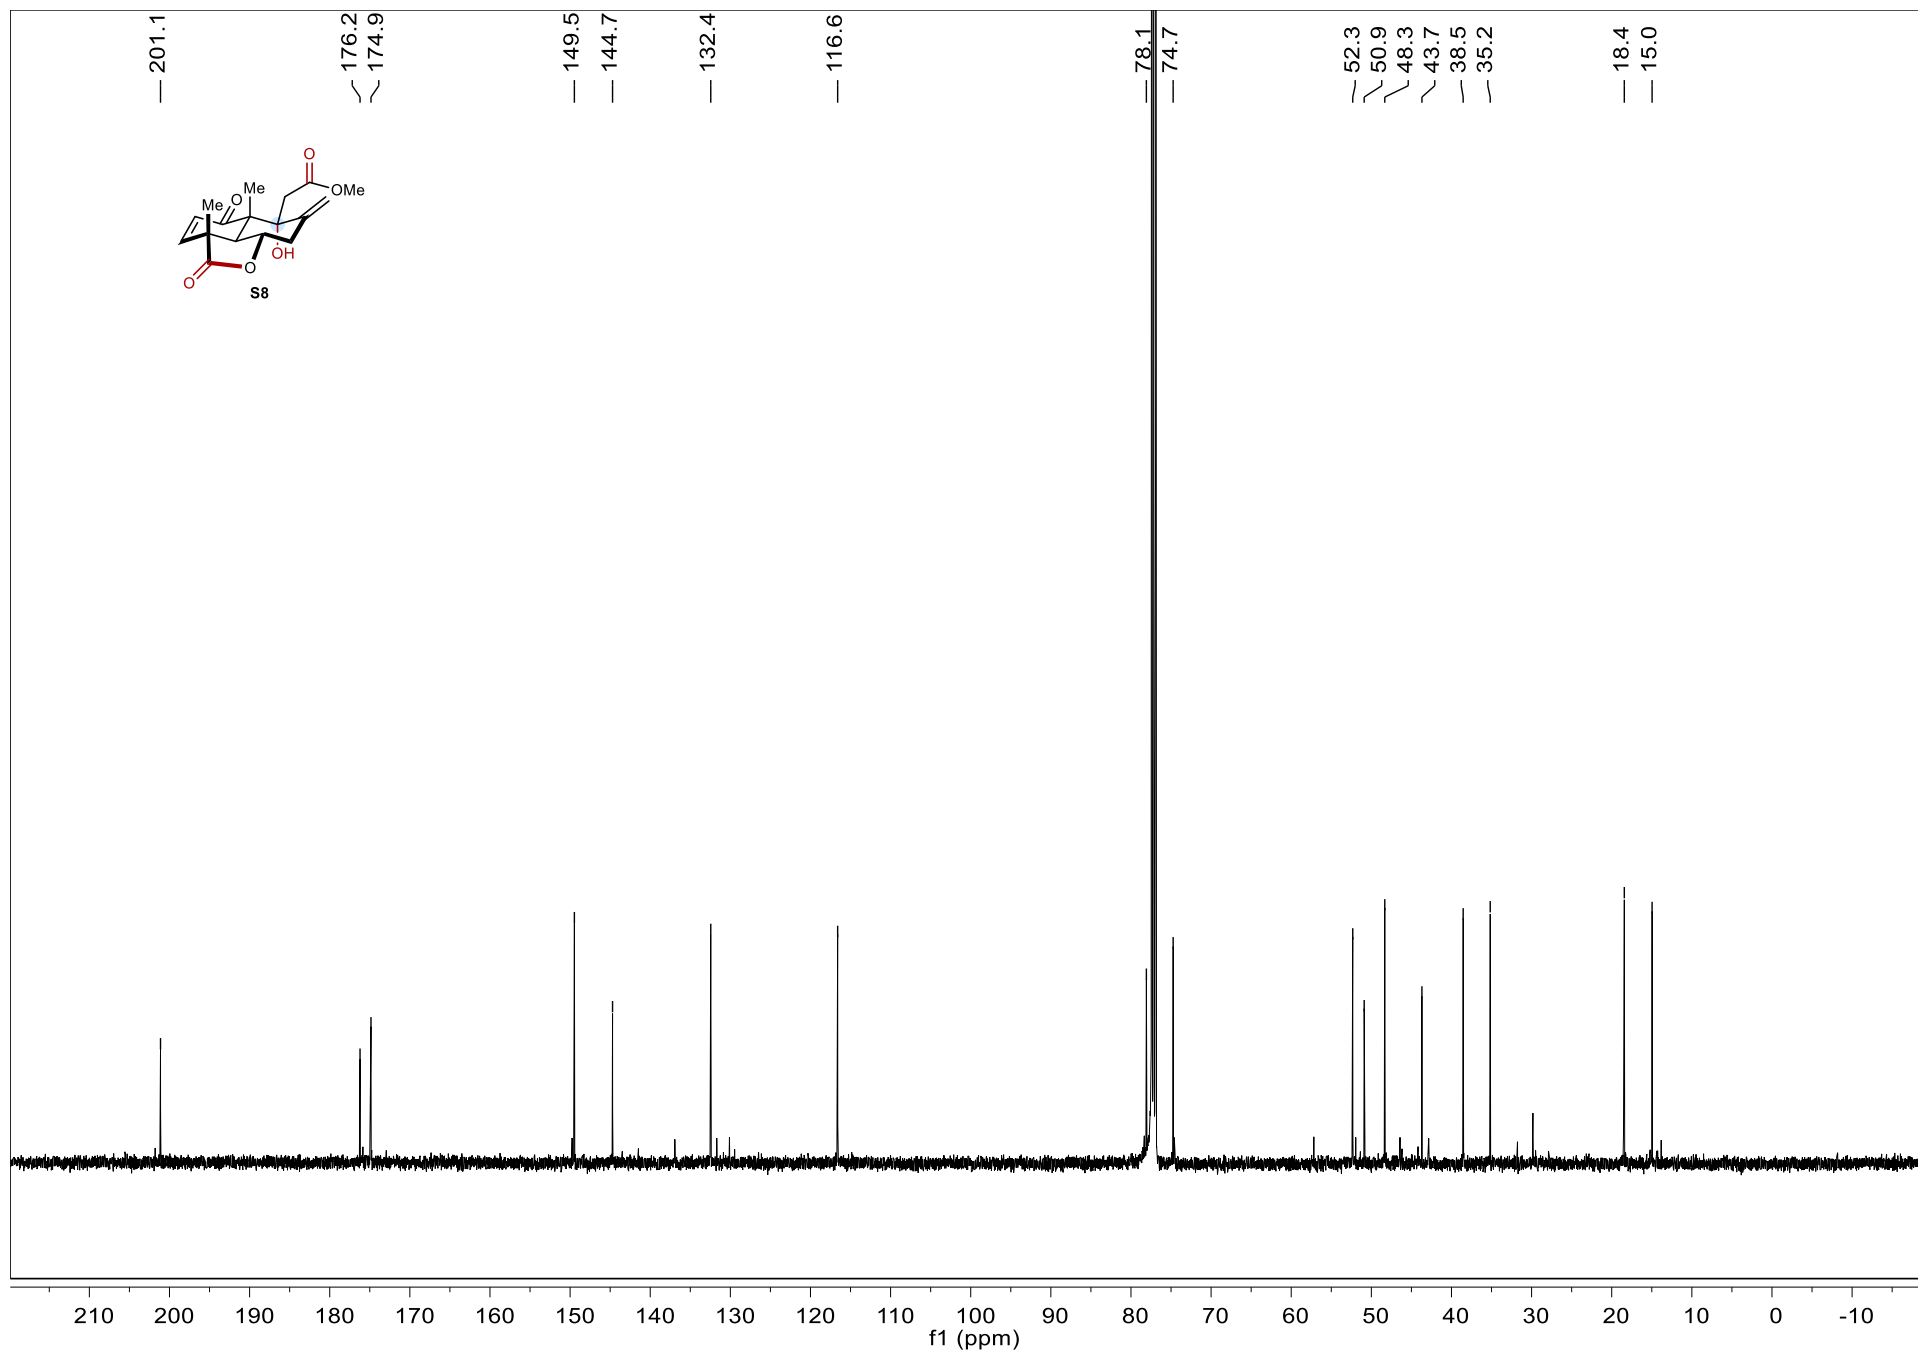

**$^1\text{H}$ - $^1\text{H}$  COSY Spectrum of compound S8 (500 MHz,  $\text{CDCl}_3$ )**

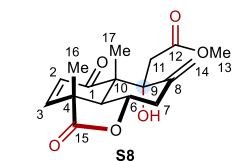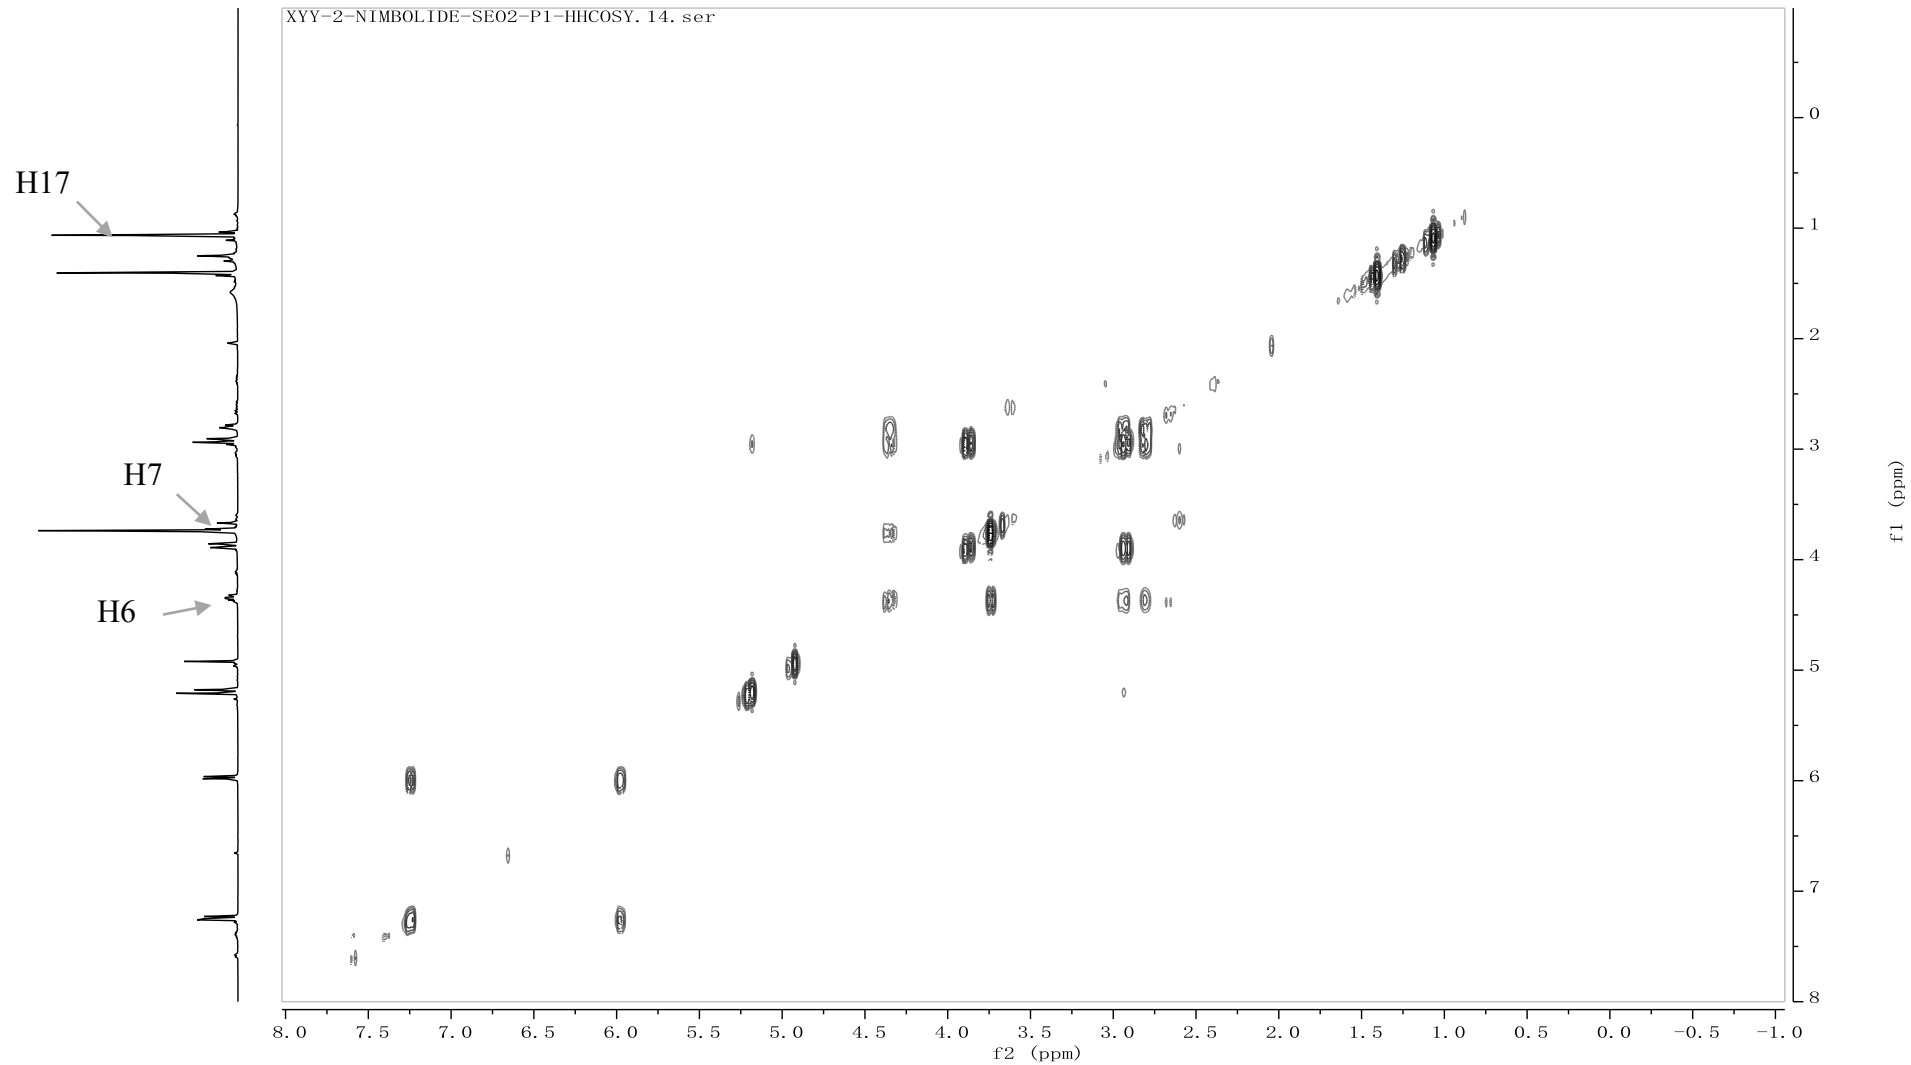

# HSQC Spectrum of compound S8 (500 MHz, CDCl<sub>3</sub>)

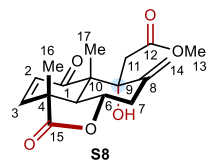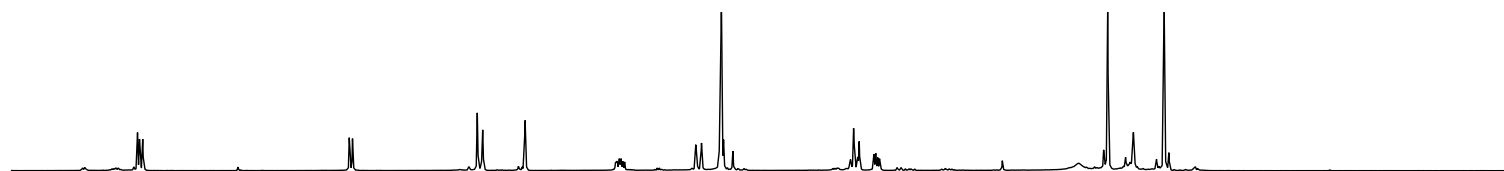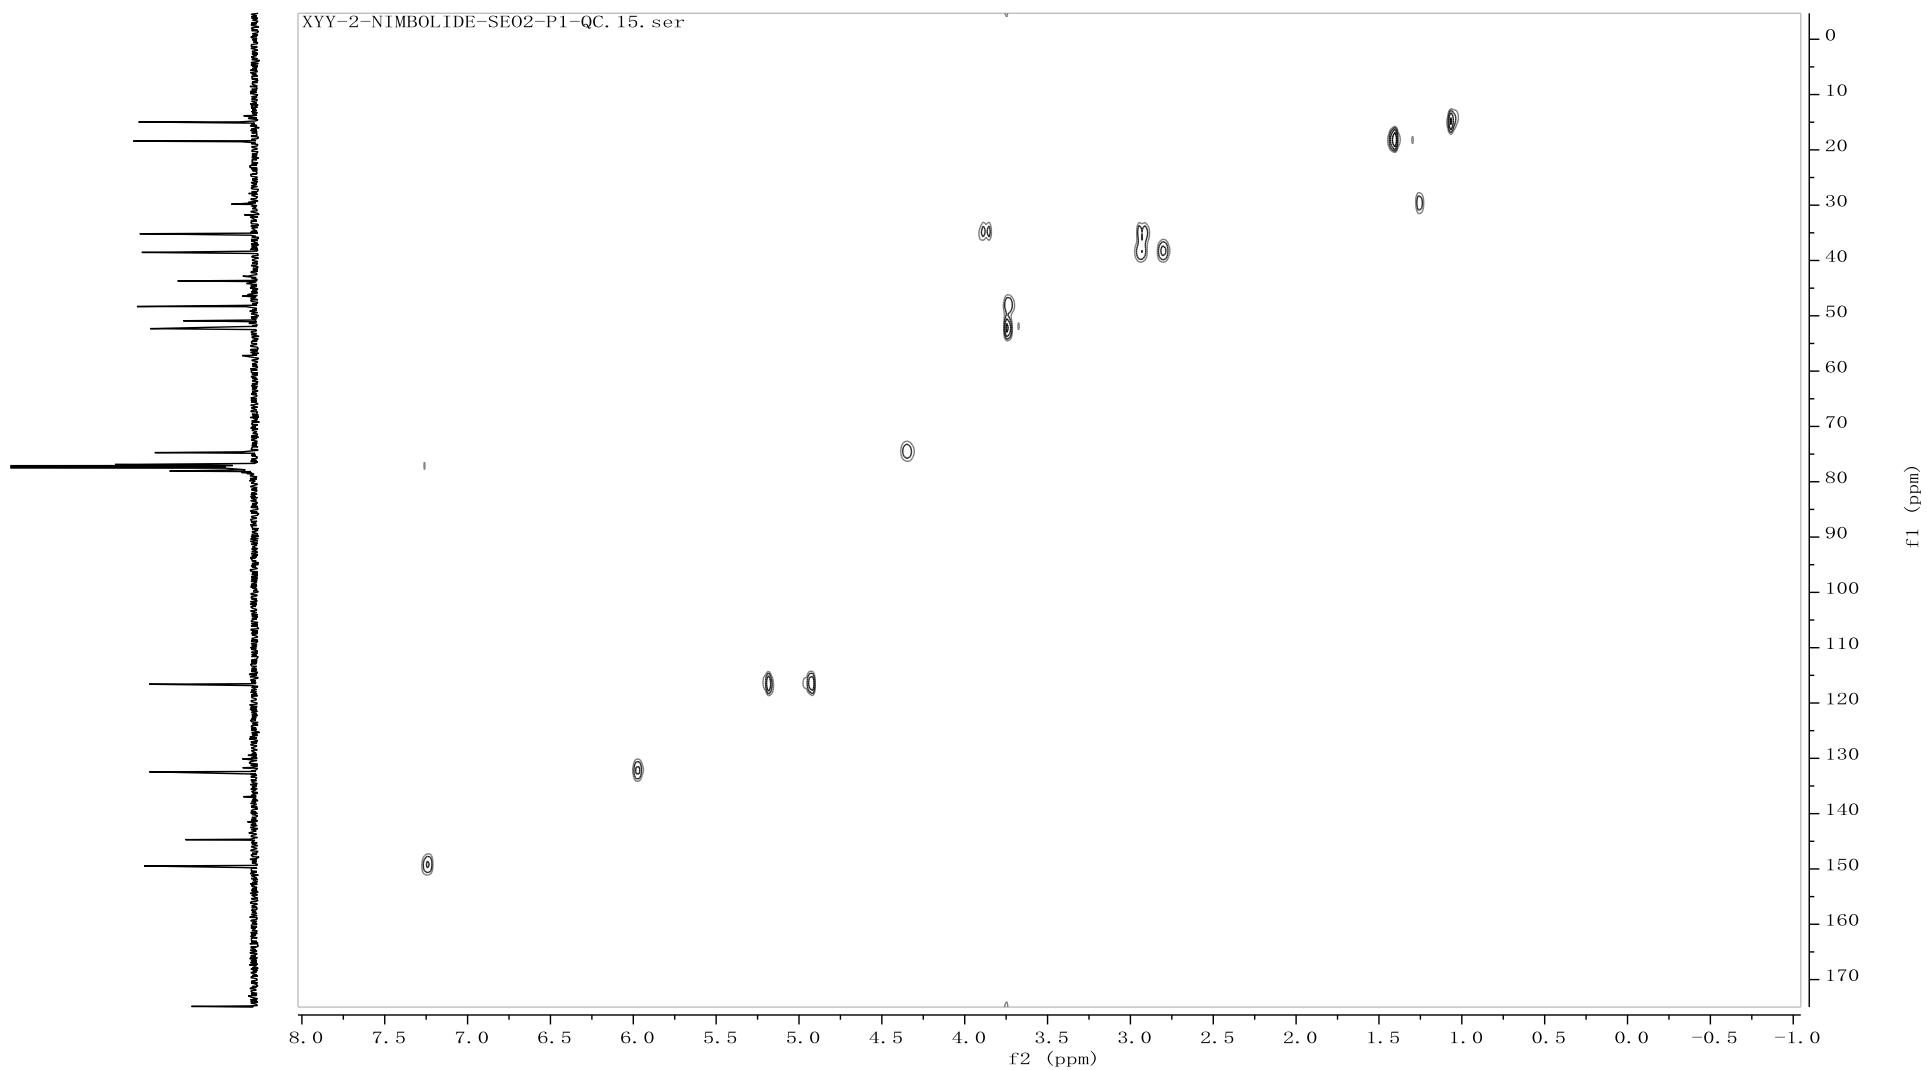



# HMBC Spectrum of compound S8 (500 MHz, CDCl<sub>3</sub>)

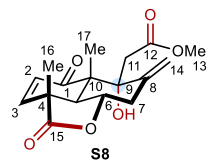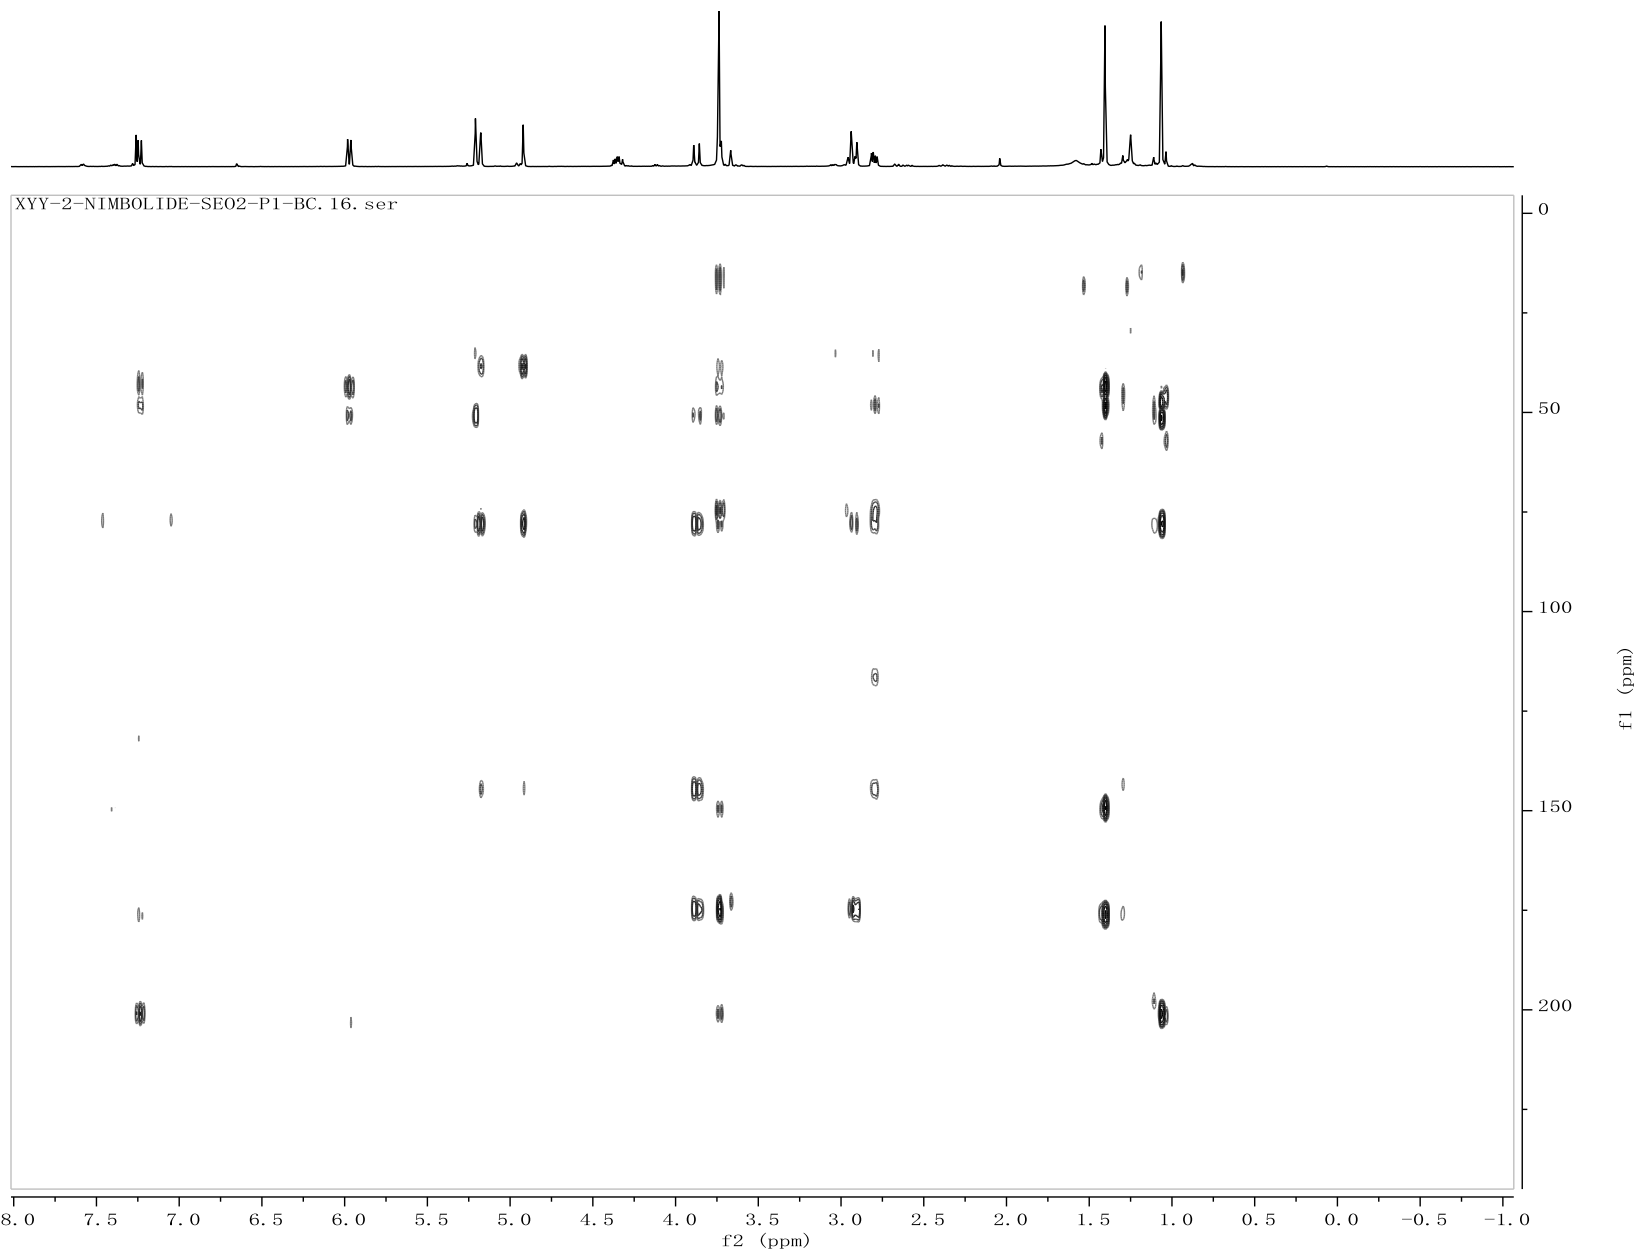

# NOESY Spectrum of compound S8 (500 MHz, CDCl<sub>3</sub>)

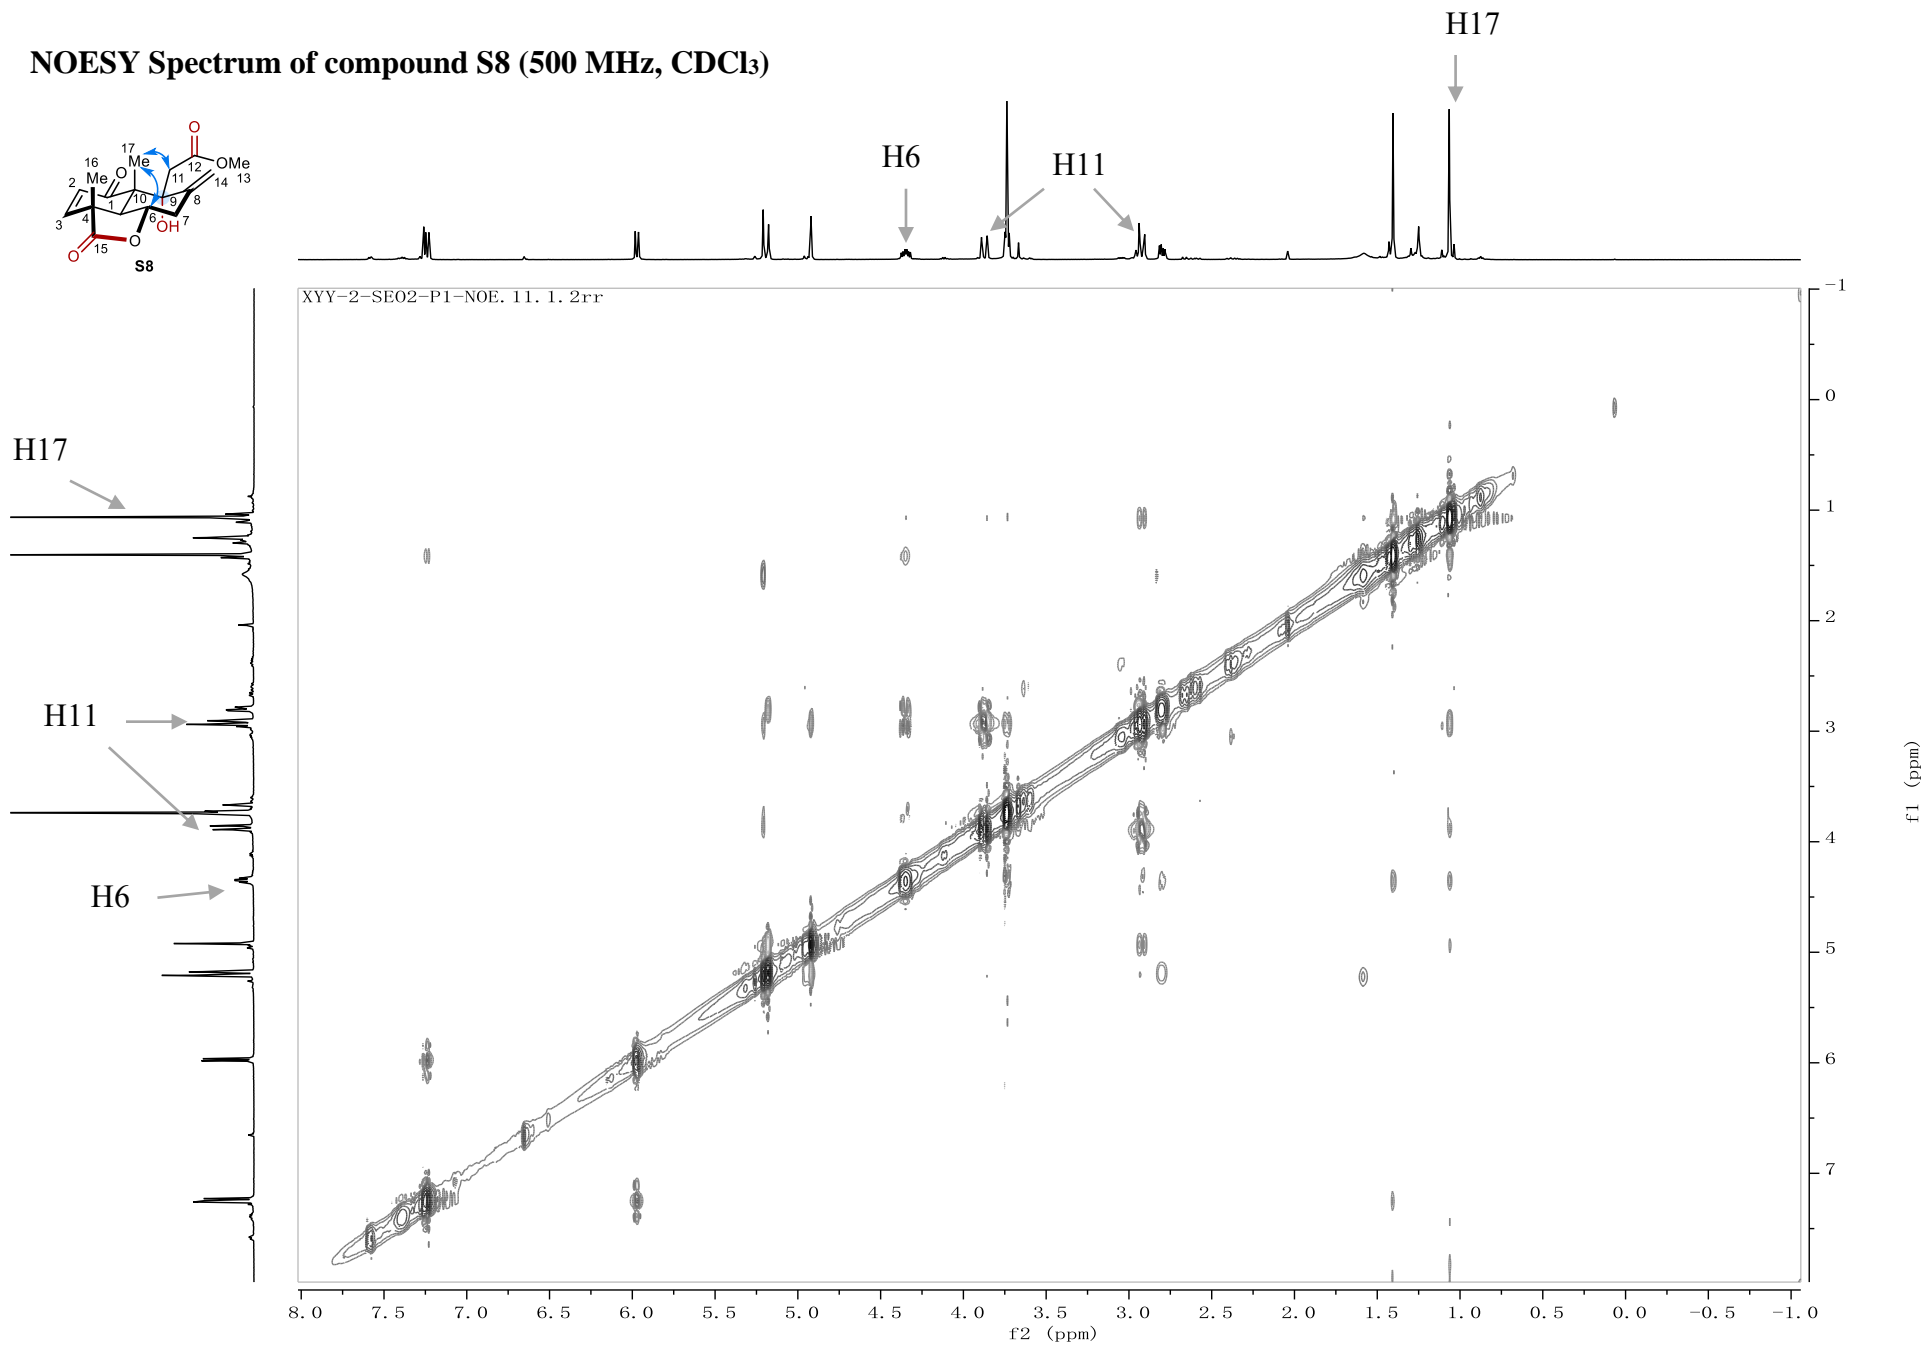

Supplement: Supplementary file 1 [file 289114e1b0b2cfd4a36bcd58.pdf]
